# Supplementary material
Source: PubMed Central journal article supplement (PMC153722)
Supplement: plntcell_15_5_1143__1.pdf [file plntcell_15_5_1143__1.pdf]

| ID | Genbank Accession | gene name                                                   | Organism | promoter length | CDS start | TSS  | TATA box | total length | Link                                                                                                                                                                                                                                                          | Notes |
|----|-------------------|-------------------------------------------------------------|----------|-----------------|-----------|------|----------|--------------|---------------------------------------------------------------------------------------------------------------------------------------------------------------------------------------------------------------------------------------------------------------|-------|
| 1  | A14628            | chlorophyll a/b binding protein (cab48.1)                   | Zea mays | 1077            | 1077      |      |          | 1095         | <a href="http://www.ncbi.nlm.nih.gov/80/entrez/query.fcgi?cmd=Retrieve&amp;db=nucleotide&amp;list_uids=490036&amp;dopt=GenBank">http://www.ncbi.nlm.nih.gov/80/entrez/query.fcgi?cmd=Retrieve&amp;db=nucleotide&amp;list_uids=490036&amp;dopt=GenBank</a>     |       |
| 2  | A23631            | stamen-specific promoter from patent WO 9213957A            | Zea mays | 1180            | 1180      |      |          | 2784         | <a href="http://www.ncbi.nlm.nih.gov/80/entrez/query.fcgi?cmd=Retrieve&amp;db=nucleotide&amp;list_uids=829239&amp;dopt=GenBank">http://www.ncbi.nlm.nih.gov/80/entrez/query.fcgi?cmd=Retrieve&amp;db=nucleotide&amp;list_uids=829239&amp;dopt=GenBank</a>     |       |
| 3  | A44432            | tubulinA promoter, SEQ ID 1 from patent EP0652286           | Zea mays | 1529            | 1529      |      |          | 1529         | <a href="http://www.ncbi.nlm.nih.gov/80/entrez/query.fcgi?cmd=Retrieve&amp;db=nucleotide&amp;list_uids=2299258&amp;dopt=GenBank">http://www.ncbi.nlm.nih.gov/80/entrez/query.fcgi?cmd=Retrieve&amp;db=nucleotide&amp;list_uids=2299258&amp;dopt=GenBank</a>   |       |
| 4  | A44433            | tubulinA promoter, SEQ ID 2 from patent EP0652286           | Zea mays | 1765            | 1765      |      |          | 1765         | <a href="http://www.ncbi.nlm.nih.gov/80/entrez/query.fcgi?cmd=Retrieve&amp;db=nucleotide&amp;list_uids=2299259&amp;dopt=GenBank">http://www.ncbi.nlm.nih.gov/80/entrez/query.fcgi?cmd=Retrieve&amp;db=nucleotide&amp;list_uids=2299259&amp;dopt=GenBank</a>   |       |
| 5  | A44434            | tubulinA promoter, SEQ ID 3 from patent EP0652286           | Zea mays | 1179            | 1179      |      |          | 1179         | <a href="http://www.ncbi.nlm.nih.gov/80/entrez/query.fcgi?cmd=Retrieve&amp;db=nucleotide&amp;list_uids=2299260&amp;dopt=GenBank">http://www.ncbi.nlm.nih.gov/80/entrez/query.fcgi?cmd=Retrieve&amp;db=nucleotide&amp;list_uids=2299260&amp;dopt=GenBank</a>   |       |
| 15 | AB001386          | ferredoxin VI                                               | Zea mays | 1063            | 1581      | 1063 |          | 2351         | <a href="http://www.ncbi.nlm.nih.gov/80/entrez/query.fcgi?cmd=Retrieve&amp;db=nucleotide&amp;list_uids=1863998&amp;dopt=GenBank">http://www.ncbi.nlm.nih.gov/80/entrez/query.fcgi?cmd=Retrieve&amp;db=nucleotide&amp;list_uids=1863998&amp;dopt=GenBank</a>   |       |
| 16 | AB001387          | ferredoxin III                                              | Zea mays | 966             | 4186      | 966  |          | 5179         | <a href="http://www.ncbi.nlm.nih.gov/80/entrez/query.fcgi?cmd=Retrieve&amp;db=nucleotide&amp;list_uids=1864000&amp;dopt=GenBank">http://www.ncbi.nlm.nih.gov/80/entrez/query.fcgi?cmd=Retrieve&amp;db=nucleotide&amp;list_uids=1864000&amp;dopt=GenBank</a>   |       |
| 17 | AB031011          | response regulator1                                         | Zea mays | 3493            | 3493      |      | 3378     | 4584         | <a href="http://www.ncbi.nlm.nih.gov/80/entrez/query.fcgi?cmd=Retrieve&amp;db=nucleotide&amp;list_uids=6009894&amp;dopt=GenBank">http://www.ncbi.nlm.nih.gov/80/entrez/query.fcgi?cmd=Retrieve&amp;db=nucleotide&amp;list_uids=6009894&amp;dopt=GenBank</a>   |       |
| 18 | AB031012          | response regulator2                                         | Zea mays | 3000            | 3000      |      | 2842     | 3846         | <a href="http://www.ncbi.nlm.nih.gov/80/entrez/query.fcgi?cmd=Retrieve&amp;db=nucleotide&amp;list_uids=6009896&amp;dopt=GenBank">http://www.ncbi.nlm.nih.gov/80/entrez/query.fcgi?cmd=Retrieve&amp;db=nucleotide&amp;list_uids=6009896&amp;dopt=GenBank</a>   |       |
| 20 | AF007786          | cystathionine gamma-synthase                                | Zea mays | 807             | 807       |      |          | 6969         | <a href="http://www.ncbi.nlm.nih.gov/80/entrez/query.fcgi?cmd=Retrieve&amp;db=nucleotide&amp;list_uids=2198852&amp;dopt=GenBank">http://www.ncbi.nlm.nih.gov/80/entrez/query.fcgi?cmd=Retrieve&amp;db=nucleotide&amp;list_uids=2198852&amp;dopt=GenBank</a>   |       |
| 21 | AF015268          | pericarp color 1, P1                                        | Zea mays | 631             | 668       | 631  |          | 1900         | <a href="http://www.ncbi.nlm.nih.gov/80/entrez/query.fcgi?cmd=Retrieve&amp;db=nucleotide&amp;list_uids=2343272&amp;dopt=GenBank">http://www.ncbi.nlm.nih.gov/80/entrez/query.fcgi?cmd=Retrieve&amp;db=nucleotide&amp;list_uids=2343272&amp;dopt=GenBank</a>   |       |
| 22 | AF030385          | nitrate-induced NOI gene                                    | Zea mays | 1476            | 1630      | 1476 |          | 5278         | <a href="http://www.ncbi.nlm.nih.gov/80/entrez/query.fcgi?cmd=Retrieve&amp;db=nucleotide&amp;list_uids=2642212&amp;dopt=GenBank">http://www.ncbi.nlm.nih.gov/80/entrez/query.fcgi?cmd=Retrieve&amp;db=nucleotide&amp;list_uids=2642212&amp;dopt=GenBank</a>   |       |
| 23 | AF030882          | sugary1 starch debranching enzyme                           | Zea mays | 1884            | 1971      | 1884 |          | 11779        | <a href="http://www.ncbi.nlm.nih.gov/80/entrez/query.fcgi?cmd=Retrieve&amp;db=nucleotide&amp;list_uids=2623247&amp;dopt=GenBank">http://www.ncbi.nlm.nih.gov/80/entrez/query.fcgi?cmd=Retrieve&amp;db=nucleotide&amp;list_uids=2623247&amp;dopt=GenBank</a>   |       |
| 25 | AF036891          | starch synthase I                                           | Zea mays | 602             | 602       |      |          | 2991         | <a href="http://www.ncbi.nlm.nih.gov/80/entrez/query.fcgi?cmd=Retrieve&amp;db=nucleotide&amp;list_uids=2828011&amp;dopt=GenBank">http://www.ncbi.nlm.nih.gov/80/entrez/query.fcgi?cmd=Retrieve&amp;db=nucleotide&amp;list_uids=2828011&amp;dopt=GenBank</a>   |       |
| 26 | AF037031          | peroxidase H                                                | Zea mays | 551             | 551       |      | 481      | 743          | <a href="http://www.ncbi.nlm.nih.gov/80/entrez/query.fcgi?cmd=Retrieve&amp;db=nucleotide&amp;list_uids=3925226&amp;dopt=GenBank">http://www.ncbi.nlm.nih.gov/80/entrez/query.fcgi?cmd=Retrieve&amp;db=nucleotide&amp;list_uids=3925226&amp;dopt=GenBank</a>   |       |
| 27 | AF037032          | peroxidase J                                                | Zea mays | 888             | 888       |      | 746      | 1065         | <a href="http://www.ncbi.nlm.nih.gov/80/entrez/query.fcgi?cmd=Retrieve&amp;db=nucleotide&amp;list_uids=3925228&amp;dopt=GenBank">http://www.ncbi.nlm.nih.gov/80/entrez/query.fcgi?cmd=Retrieve&amp;db=nucleotide&amp;list_uids=3925228&amp;dopt=GenBank</a>   |       |
| 28 | AF037035          | peroxidase K                                                | Zea mays | 1434            | 1434      |      | 1293     | 1629         | <a href="http://www.ncbi.nlm.nih.gov/80/entrez/query.fcgi?cmd=Retrieve&amp;db=nucleotide&amp;list_uids=3925234&amp;dopt=GenBank">http://www.ncbi.nlm.nih.gov/80/entrez/query.fcgi?cmd=Retrieve&amp;db=nucleotide&amp;list_uids=3925234&amp;dopt=GenBank</a>   |       |
| 31 | AF043346          | cell wall invertase INCW3                                   | Zea mays | 2123            | 2242      | 2123 | 2123     | 6997         | <a href="http://www.ncbi.nlm.nih.gov/80/entrez/query.fcgi?cmd=Retrieve&amp;db=nucleotide&amp;list_uids=4105122&amp;dopt=GenBank">http://www.ncbi.nlm.nih.gov/80/entrez/query.fcgi?cmd=Retrieve&amp;db=nucleotide&amp;list_uids=4105122&amp;dopt=GenBank</a>   |       |
| 32 | AF043347          | cell wall invertase INCW4                                   | Zea mays | 2050            | 2349      | 2050 | 2050     | 5535         | <a href="http://www.ncbi.nlm.nih.gov/80/entrez/query.fcgi?cmd=Retrieve&amp;db=nucleotide&amp;list_uids=4105124&amp;dopt=GenBank">http://www.ncbi.nlm.nih.gov/80/entrez/query.fcgi?cmd=Retrieve&amp;db=nucleotide&amp;list_uids=4105124&amp;dopt=GenBank</a>   |       |
| 33 | AF044603          | cytokinin oxidase (cxk1)                                    | Zea mays | 1497            | 1497      |      |          | 6733         | <a href="http://www.ncbi.nlm.nih.gov/80/entrez/query.fcgi?cmd=Retrieve&amp;db=nucleotide&amp;list_uids=3341977&amp;dopt=GenBank">http://www.ncbi.nlm.nih.gov/80/entrez/query.fcgi?cmd=Retrieve&amp;db=nucleotide&amp;list_uids=3341977&amp;dopt=GenBank</a>   |       |
| 35 | AF055898          | alanine aminotransferase                                    | Zea mays | 1034            | 1102      | 1034 | 969      | 6176         | <a href="http://www.ncbi.nlm.nih.gov/80/entrez/query.fcgi?cmd=Retrieve&amp;db=nucleotide&amp;list_uids=3694806&amp;dopt=GenBank">http://www.ncbi.nlm.nih.gov/80/entrez/query.fcgi?cmd=Retrieve&amp;db=nucleotide&amp;list_uids=3694806&amp;dopt=GenBank</a>   |       |
| 36 | AF063403          | putative cytosine-5 DNA methyltransferase ZMET1             | Zea mays | 1854            | 1854      | 1854 |          | 7955         | <a href="http://www.ncbi.nlm.nih.gov/80/entrez/query.fcgi?cmd=Retrieve&amp;db=nucleotide&amp;list_uids=3132824&amp;dopt=GenBank">http://www.ncbi.nlm.nih.gov/80/entrez/query.fcgi?cmd=Retrieve&amp;db=nucleotide&amp;list_uids=3132824&amp;dopt=GenBank</a>   |       |
| 38 | AF068119          | beta-amylase2                                               | Zea mays | 1647            | 1647      |      | 1539     | 5154         | <a href="http://www.ncbi.nlm.nih.gov/80/entrez/query.fcgi?cmd=Retrieve&amp;db=nucleotide&amp;list_uids=4321977&amp;dopt=GenBank">http://www.ncbi.nlm.nih.gov/80/entrez/query.fcgi?cmd=Retrieve&amp;db=nucleotide&amp;list_uids=4321977&amp;dopt=GenBank</a>   |       |
| 39 | AF073775          | replication origin activator2                               | Zea mays | 3260            | 3361      | 3260 |          | 4566         | <a href="http://www.ncbi.nlm.nih.gov/80/entrez/query.fcgi?cmd=Retrieve&amp;db=nucleotide&amp;list_uids=4558459&amp;dopt=GenBank">http://www.ncbi.nlm.nih.gov/80/entrez/query.fcgi?cmd=Retrieve&amp;db=nucleotide&amp;list_uids=4558459&amp;dopt=GenBank</a>   |       |
| 41 | AF090447          | 22-kDa zein                                                 | Zea mays | 1256            | 1256      | 1256 |          | 3000         | <a href="http://www.ncbi.nlm.nih.gov/80/entrez/query.fcgi?cmd=Retrieve&amp;db=nucleotide&amp;list_uids=1360608&amp;dopt=GenBank">http://www.ncbi.nlm.nih.gov/80/entrez/query.fcgi?cmd=Retrieve&amp;db=nucleotide&amp;list_uids=1360608&amp;dopt=GenBank</a>   |       |
| 42 | AF100769          | receptor-like kinase Zm2ARK                                 | Zea mays | 901             | 901       |      |          | 2748         | <a href="http://www.ncbi.nlm.nih.gov/80/entrez/query.fcgi?cmd=Retrieve&amp;db=nucleotide&amp;list_uids=5669669&amp;dopt=GenBank">http://www.ncbi.nlm.nih.gov/80/entrez/query.fcgi?cmd=Retrieve&amp;db=nucleotide&amp;list_uids=5669669&amp;dopt=GenBank</a>   |       |
| 43 | AF135456          | R1-Lcm1, anthocyanin regulatory gene                        | Zea mays | 1764            | 2145      |      | 1764     | 2166         | <a href="http://www.ncbi.nlm.nih.gov/80/entrez/query.fcgi?cmd=Retrieve&amp;db=nucleotide&amp;list_uids=5882209&amp;dopt=GenBank">http://www.ncbi.nlm.nih.gov/80/entrez/query.fcgi?cmd=Retrieve&amp;db=nucleotide&amp;list_uids=5882209&amp;dopt=GenBank</a>   |       |
| 44 | AF135457          | R1-Lcm2, anthocyanin regulatory gene                        | Zea mays | 2149            | 2149      |      |          | 2170         | <a href="http://www.ncbi.nlm.nih.gov/80/entrez/query.fcgi?cmd=Retrieve&amp;db=nucleotide&amp;list_uids=5882211&amp;dopt=GenBank">http://www.ncbi.nlm.nih.gov/80/entrez/query.fcgi?cmd=Retrieve&amp;db=nucleotide&amp;list_uids=5882211&amp;dopt=GenBank</a>   |       |
| 45 | AF135458          | R1-scm, anthocyanin regulatory gene                         | Zea mays | 1449            | 1449      |      |          | 1470         | <a href="http://www.ncbi.nlm.nih.gov/80/entrez/query.fcgi?cmd=Retrieve&amp;db=nucleotide&amp;list_uids=5882213&amp;dopt=GenBank">http://www.ncbi.nlm.nih.gov/80/entrez/query.fcgi?cmd=Retrieve&amp;db=nucleotide&amp;list_uids=5882213&amp;dopt=GenBank</a>   |       |
| 46 | AF141939          | nitrate reductase                                           | Zea mays | 451             |           |      |          | 451          | <a href="http://www.ncbi.nlm.nih.gov/80/entrez/query.fcgi?cmd=Retrieve&amp;db=nucleotide&amp;list_uids=4894987&amp;dopt=GenBank">http://www.ncbi.nlm.nih.gov/80/entrez/query.fcgi?cmd=Retrieve&amp;db=nucleotide&amp;list_uids=4894987&amp;dopt=GenBank</a>   |       |
| 47 | AF149016          | tapetum-specific endoxylanase                               | Zea mays | 2305            | 2305      |      |          | 3711         | <a href="http://www.ncbi.nlm.nih.gov/80/entrez/query.fcgi?cmd=Retrieve&amp;db=nucleotide&amp;list_uids=7920154&amp;dopt=GenBank">http://www.ncbi.nlm.nih.gov/80/entrez/query.fcgi?cmd=Retrieve&amp;db=nucleotide&amp;list_uids=7920154&amp;dopt=GenBank</a>   |       |
| 48 | AF153448          | nitrate reductase1                                          | Zea mays | 2845            | 2953      | 2845 | 2811     | 8043         | <a href="http://www.ncbi.nlm.nih.gov/80/entrez/query.fcgi?cmd=Retrieve&amp;db=nucleotide&amp;list_uids=5020384&amp;dopt=GenBank">http://www.ncbi.nlm.nih.gov/80/entrez/query.fcgi?cmd=Retrieve&amp;db=nucleotide&amp;list_uids=5020384&amp;dopt=GenBank</a>   |       |
| 49 | AF159297          | Pex2 pollen extensin-like protein                           | Zea mays | 410             | 410       |      |          | 4498         | <a href="http://www.ncbi.nlm.nih.gov/80/entrez/query.fcgi?cmd=Retrieve&amp;db=nucleotide&amp;list_uids=5917665&amp;dopt=GenBank">http://www.ncbi.nlm.nih.gov/80/entrez/query.fcgi?cmd=Retrieve&amp;db=nucleotide&amp;list_uids=5917665&amp;dopt=GenBank</a>   |       |
| 50 | AF166527          | Luminidependens                                             | Zea mays | 580             | 724       | 580  |          | 10304        | <a href="http://www.ncbi.nlm.nih.gov/80/entrez/query.fcgi?cmd=Retrieve&amp;db=nucleotide&amp;list_uids=5805318&amp;dopt=GenBank">http://www.ncbi.nlm.nih.gov/80/entrez/query.fcgi?cmd=Retrieve&amp;db=nucleotide&amp;list_uids=5805318&amp;dopt=GenBank</a>   |       |
| 51 | AF209212          | Pericarp color1, P1-r allele                                | Zea mays | 6401            |           |      | 6401     | 6403         | <a href="http://www.ncbi.nlm.nih.gov/80/entrez/query.fcgi?cmd=Retrieve&amp;db=nucleotide&amp;list_uids=10086251&amp;dopt=GenBank">http://www.ncbi.nlm.nih.gov/80/entrez/query.fcgi?cmd=Retrieve&amp;db=nucleotide&amp;list_uids=10086251&amp;dopt=GenBank</a> |       |
| 52 | AF210616          | Pericarp color2, P2                                         | Zea mays | 4710            | 4710      |      |          | 12634        | <a href="http://www.ncbi.nlm.nih.gov/80/entrez/query.fcgi?cmd=Retrieve&amp;db=nucleotide&amp;list_uids=11526772&amp;dopt=GenBank">http://www.ncbi.nlm.nih.gov/80/entrez/query.fcgi?cmd=Retrieve&amp;db=nucleotide&amp;list_uids=11526772&amp;dopt=GenBank</a> |       |
| 53 | AF215823          | sterility                                                   | Zea mays | 3120            | 3373      |      | 3120     | 17380        | <a href="http://www.ncbi.nlm.nih.gov/80/entrez/query.fcgi?cmd=Retrieve&amp;db=nucleotide&amp;list_uids=12004293&amp;dopt=GenBank">http://www.ncbi.nlm.nih.gov/80/entrez/query.fcgi?cmd=Retrieve&amp;db=nucleotide&amp;list_uids=12004293&amp;dopt=GenBank</a> |       |
| 54 | AF225411          | exoglucanase precursor exg1                                 | Zea mays | 683             | 683       |      |          | 4193         | <a href="http://www.ncbi.nlm.nih.gov/80/entrez/query.fcgi?cmd=Retrieve&amp;db=nucleotide&amp;list_uids=8809763&amp;dopt=GenBank">http://www.ncbi.nlm.nih.gov/80/entrez/query.fcgi?cmd=Retrieve&amp;db=nucleotide&amp;list_uids=8809763&amp;dopt=GenBank</a>   |       |
| 55 | AF228486          | starch branching enzyme IIa                                 | Zea mays | 3853            | 3853      |      |          | 4668         | <a href="http://www.ncbi.nlm.nih.gov/80/entrez/query.fcgi?cmd=Retrieve&amp;db=nucleotide&amp;list_uids=7677354&amp;dopt=GenBank">http://www.ncbi.nlm.nih.gov/80/entrez/query.fcgi?cmd=Retrieve&amp;db=nucleotide&amp;list_uids=7677354&amp;dopt=GenBank</a>   |       |
| 56 | AF243041          | receptor-like protein kinase PRK1                           | Zea mays | 567             | 567       |      |          | 3416         | <a href="http://www.ncbi.nlm.nih.gov/80/entrez/query.fcgi?cmd=Retrieve&amp;db=nucleotide&amp;list_uids=13506811&amp;dopt=GenBank">http://www.ncbi.nlm.nih.gov/80/entrez/query.fcgi?cmd=Retrieve&amp;db=nucleotide&amp;list_uids=13506811&amp;dopt=GenBank</a> |       |
| 57 | AF250191          | calmodulin binding protein                                  | Zea mays | 1087            | 1087      |      |          | 4944         | <a href="http://www.ncbi.nlm.nih.gov/80/entrez/query.fcgi?cmd=Retrieve&amp;db=nucleotide&amp;list_uids=10086259&amp;dopt=GenBank">http://www.ncbi.nlm.nih.gov/80/entrez/query.fcgi?cmd=Retrieve&amp;db=nucleotide&amp;list_uids=10086259&amp;dopt=GenBank</a> |       |
| 58 | AF264877          | elongation factor TuM                                       | Zea mays | 1001            | 1001      |      |          | 5993         | <a href="http://www.ncbi.nlm.nih.gov/80/entrez/query.fcgi?cmd=Retrieve&amp;db=nucleotide&amp;list_uids=11181615&amp;dopt=GenBank">http://www.ncbi.nlm.nih.gov/80/entrez/query.fcgi?cmd=Retrieve&amp;db=nucleotide&amp;list_uids=11181615&amp;dopt=GenBank</a> |       |
| 59 | AF271383          | indole glycerol-3-phosphate lyase/tryptophan synthaseA-like | Zea mays | 248             | 248       |      |          | 6644         | <a href="http://www.ncbi.nlm.nih.gov/80/entrez/query.fcgi?cmd=Retrieve&amp;db=nucleotide&amp;list_uids=11993324&amp;dopt=GenBank">http://www.ncbi.nlm.nih.gov/80/entrez/query.fcgi?cmd=Retrieve&amp;db=nucleotide&amp;list_uids=11993324&amp;dopt=GenBank</a> |       |
| 60 | AF271636          | lysine ketoglutarate reductase/saccharopine dehydrogenase   | Zea mays | 4027            | 4027      |      |          | 15146        | <a href="http://www.ncbi.nlm.nih.gov/80/entrez/query.fcgi?cmd=Retrieve&amp;db=nucleotide&amp;list_uids=10716964&amp;dopt=GenBank">http://www.ncbi.nlm.nih.gov/80/entrez/query.fcgi?cmd=Retrieve&amp;db=nucleotide&amp;list_uids=10716964&amp;dopt=GenBank</a> |       |
| 61 | AF289237          | calcium/calmodulin dependent protein kinase MCK2            | Zea mays | 906             | 906       |      |          | 7359         | <a href="http://www.ncbi.nlm.nih.gov/80/entrez/query.fcgi?cmd=Retrieve&amp;db=nucleotide&amp;list_uids=9658872&amp;dopt=GenBank">http://www.ncbi.nlm.nih.gov/80/entrez/query.fcgi?cmd=Retrieve&amp;db=nucleotide&amp;list_uids=9658872&amp;dopt=GenBank</a>   |       |
| 64 | AF298118          | differentiation                                             | Zea mays | 1097            | 1097      |      |          | 5168         | <a href="http://www.ncbi.nlm.nih.gov/80/entrez/query.fcgi?cmd=Retrieve&amp;db=nucleotide&amp;list_uids=11177539&amp;dopt=GenBank">http://www.ncbi.nlm.nih.gov/80/entrez/query.fcgi?cmd=Retrieve&amp;db=nucleotide&amp;list_uids=11177539&amp;dopt=GenBank</a> |       |
| 65 | AF315587          | biosynthesis, PI-0 allele                                   | Zea mays | 702             | 702       |      |          | 1891         | <a href="http://www.ncbi.nlm.nih.gov/80/entrez/query.fcgi?cmd=Retrieve&amp;db=nucleotide&amp;list_uids=11229034&amp;dopt=GenBank">http://www.ncbi.nlm.nih.gov/80/entrez/query.fcgi?cmd=Retrieve&amp;db=nucleotide&amp;list_uids=11229034&amp;dopt=GenBank</a> |       |
| 67 | AF334959          | Brittle2 ADP-glucose pyrophosphorylase subunit              | Zea mays | 877             | 901       | 877  | 843      | 6695         | <a href="http://www.ncbi.nlm.nih.gov/80/entrez/query.fcgi?cmd=Retrieve&amp;db=nucleotide&amp;list_uids=14582765&amp;dopt=GenBank">http://www.ncbi.nlm.nih.gov/80/entrez/query.fcgi?cmd=Retrieve&amp;db=nucleotide&amp;list_uids=14582765&amp;dopt=GenBank</a> |       |
| 68 | AF334960          | leaf ADP-glucose pyrophosphorylase small subunit            | Zea mays | 2431            | 2431      |      |          | 6930         | <a href="http://www.ncbi.nlm.nih.gov/80/entrez/query.fcgi?cmd=Retrieve&amp;db=nucleotide&amp;list_uids=14582767&amp;dopt=GenBank">http://www.ncbi.nlm.nih.gov/80/entrez/query.fcgi?cmd=Retrieve&amp;db=nucleotide&amp;list_uids=14582767&amp;dopt=GenBank</a> |       |
| 70 | AF348319          | terminal ear1                                               | Zea mays | 3216            | 3240      |      | 3216     | 8038         | <a href="http://www.ncbi.nlm.nih.gov/80/entrez/query.fcgi?cmd=Retrieve&amp;db=nucleotide&amp;list_uids=13540359&amp;dopt=GenBank">http://www.ncbi.nlm.nih.gov/80/entrez/query.fcgi?cmd=Retrieve&amp;db=nucleotide&amp;list_uids=13540359&amp;dopt=GenBank</a> |       |
| 71 | AF350331          | Mutator transposase protein mudrA1                          | Zea mays | 450             | 450       |      |          | 557          | <a href="http://www.ncbi.nlm.nih.gov/80/entrez/query.fcgi?cmd=Retrieve&amp;db=nucleotide&amp;list_uids=14009772&amp;dopt=GenBank">http://www.ncbi.nlm.nih.gov/80/entrez/query.fcgi?cmd=Retrieve&amp;db=nucleotide&amp;list_uids=14009772&amp;dopt=GenBank</a> |       |
| 72 | AF350337          | Mutator transposase protein mudrA7                          | Zea mays | 461             | 461       |      |          | 568          | <a href="http://www.ncbi.nlm.nih.gov/80/entrez/query.fcgi?cmd=Retrieve&amp;db=nucleotide&amp;list_uids=14009784&amp;dopt=GenBank">http://www.ncbi.nlm.nih.gov/80/entrez/query.fcgi?cmd=Retrieve&amp;db=nucleotide&amp;list_uids=14009784&amp;dopt=GenBank</a> |       |
| 73 | AF350340          | Mutator transposase protein hMURB1                          | Zea mays | 458             | 458       |      |          | 1179         | <a href="http://www.ncbi.nlm.nih.gov/80/entrez/query.fcgi?cmd=Retrieve&amp;db=nucleotide&amp;list_uids=14009788&amp;dopt=GenBank">http://www.ncbi.nlm.nih.gov/80/entrez/query.fcgi?cmd=Retrieve&amp;db=nucleotide&amp;list_uids=14009788&amp;dopt=GenBank</a> |       |
| 74 | AF350360          | Mutator transposase protein hMURB21                         | Zea mays | 467             | 467       |      |          | 1188         | <a href="http://www.ncbi.nlm.nih.gov/80/entrez/query.fcgi?cmd=Retrieve&amp;db=nucleotide&amp;list_uids=14009828&amp;dopt=GenBank">http://www.ncbi.nlm.nih.gov/80/entrez/query.fcgi?cmd=Retrieve&amp;db=nucleotide&amp;list_uids=14009828&amp;dopt=GenBank</a> |       |
| 75 | AF360356          | male fertility protein Ms45                                 | Zea mays | 1392            | 1392      |      |          | 3343         | <a href="http://www.ncbi.nlm.nih.gov/80/entrez/query.fcgi?cmd=Retrieve&amp;db=nucleotide&amp;list_uids=1402875&amp;dopt=GenBank">http://www.ncbi.nlm.nih.gov/80/entrez/query.fcgi?cmd=Retrieve&amp;db=nucleotide&amp;list_uids=1402875&amp;dopt=GenBank</a>   |       |
| 76 | AF366294          | male fertility gene ms-b57                                  | Zea mays | 269             |           |      | 269      | 322          | <a href="http://www.ncbi.nlm.nih.gov/80/entrez/query.fcgi?cmd=Retrieve&amp;db=nucleotide&amp;list_uids=14030552&amp;dopt=GenBank">http://www.ncbi.nlm.nih.gov/80/entrez/query.fcgi?cmd=Retrieve&amp;db=nucleotide&amp;list_uids=14030552&amp;dopt=GenBank</a> |       |
| 77 | AF366296          | sb200                                                       | Zea mays | 1006            |           |      | 1006     | 1091         | <a href="http://www.ncbi.nlm.nih.gov/80/entrez/query.fcgi?cmd=Retrieve&amp;db=nucleotide&amp;list_uids=14030555&amp;dopt=GenBank">http://www.ncbi.nlm.nih.gov/80/entrez/query.fcgi?cmd=Retrieve&amp;db=nucleotide&amp;list_uids=14030555&amp;dopt=GenBank</a> |       |

|     |          |                                                              |          |      |      |      |      |      |                                                                                                                                                                                                                                                         |  |
|-----|----------|--------------------------------------------------------------|----------|------|------|------|------|------|---------------------------------------------------------------------------------------------------------------------------------------------------------------------------------------------------------------------------------------------------------|--|
| 78  | AF37732  | teosinte branched1, B73 allele                               | Zea mays | 1803 | 1803 | 1803 | 1803 | 2754 | <a href="http://www.ncbi.nlm.nih.gov/entrez/query.fcgi?cmd=Retrieve&amp;db=nucleotide&amp;list_uids=14326324&amp;dopt=GenBank">http://www.ncbi.nlm.nih.gov/entrez/query.fcgi?cmd=Retrieve&amp;db=nucleotide&amp;list_uids=14326324&amp;dopt=GenBank</a> |  |
| 80  | AF391808 | MAP kinase kinase mapkk1, promoter from 3943 to 7823         | Zea mays | 3880 | 7823 |      |      | 6000 | <a href="http://www.ncbi.nlm.nih.gov/entrez/query.fcgi?cmd=Retrieve&amp;db=nucleotide&amp;list_uids=17082476&amp;dopt=GenBank">http://www.ncbi.nlm.nih.gov/entrez/query.fcgi?cmd=Retrieve&amp;db=nucleotide&amp;list_uids=17082476&amp;dopt=GenBank</a> |  |
| 92  | AR135323 | rs324 root-specific promoter, SEQ ID1 from patent US 6194636 | Zea mays | 1609 |      |      |      | 1609 | <a href="http://www.ncbi.nlm.nih.gov/entrez/query.fcgi?cmd=Retrieve&amp;db=nucleotide&amp;list_uids=14124228&amp;dopt=GenBank">http://www.ncbi.nlm.nih.gov/entrez/query.fcgi?cmd=Retrieve&amp;db=nucleotide&amp;list_uids=14124228&amp;dopt=GenBank</a> |  |
| 94  | AR141098 | 0073474                                                      | Zea mays | 2584 |      |      |      | 2584 | <a href="http://www.ncbi.nlm.nih.gov/entrez/query.fcgi?cmd=Retrieve&amp;db=nucleotide&amp;list_uids=14483593&amp;dopt=GenBank">http://www.ncbi.nlm.nih.gov/entrez/query.fcgi?cmd=Retrieve&amp;db=nucleotide&amp;list_uids=14483593&amp;dopt=GenBank</a> |  |
| 97  | AR145493 | lethal leaf spot1 promoter, SEQ ID 3 from patent US 6211437  | Zea mays | 4015 |      |      |      | 4015 | <a href="http://www.ncbi.nlm.nih.gov/entrez/query.fcgi?cmd=Retrieve&amp;db=nucleotide&amp;list_uids=15107360&amp;dopt=GenBank">http://www.ncbi.nlm.nih.gov/entrez/query.fcgi?cmd=Retrieve&amp;db=nucleotide&amp;list_uids=15107360&amp;dopt=GenBank</a> |  |
| 102 | AX018975 | patent WO 9942587                                            | Zea mays | 1890 |      |      |      | 1890 | <a href="http://www.ncbi.nlm.nih.gov/entrez/query.fcgi?cmd=Retrieve&amp;db=nucleotide&amp;list_uids=10043070&amp;dopt=GenBank">http://www.ncbi.nlm.nih.gov/entrez/query.fcgi?cmd=Retrieve&amp;db=nucleotide&amp;list_uids=10043070&amp;dopt=GenBank</a> |  |
| 152 | AX041008 | patent WO 0065037                                            | Zea mays | 2782 |      |      | 2782 | 7789 | <a href="http://www.ncbi.nlm.nih.gov/entrez/query.fcgi?cmd=Retrieve&amp;db=nucleotide&amp;list_uids=11340604&amp;dopt=GenBank">http://www.ncbi.nlm.nih.gov/entrez/query.fcgi?cmd=Retrieve&amp;db=nucleotide&amp;list_uids=11340604&amp;dopt=GenBank</a> |  |
| 163 | AX046673 | tapetum-specific promoter Mac2 from patent WO 0068403        | Zea mays | 1250 | 1250 |      |      | 1321 | <a href="http://www.ncbi.nlm.nih.gov/entrez/query.fcgi?cmd=Retrieve&amp;db=nucleotide&amp;list_uids=11876236&amp;dopt=GenBank">http://www.ncbi.nlm.nih.gov/entrez/query.fcgi?cmd=Retrieve&amp;db=nucleotide&amp;list_uids=11876236&amp;dopt=GenBank</a> |  |
| 166 | AX046682 | tapetum-specific promoter Mac20 from patent WO 0068403       | Zea mays | 621  | 621  |      |      | 1133 | <a href="http://www.ncbi.nlm.nih.gov/entrez/query.fcgi?cmd=Retrieve&amp;db=nucleotide&amp;list_uids=11876243&amp;dopt=GenBank">http://www.ncbi.nlm.nih.gov/entrez/query.fcgi?cmd=Retrieve&amp;db=nucleotide&amp;list_uids=11876243&amp;dopt=GenBank</a> |  |
| 203 | AX085359 | patent WO 0112799                                            | Zea mays | 1813 |      |      | 1813 | 5031 | <a href="http://www.ncbi.nlm.nih.gov/entrez/query.fcgi?cmd=Retrieve&amp;db=nucleotide&amp;list_uids=13275414&amp;dopt=GenBank">http://www.ncbi.nlm.nih.gov/entrez/query.fcgi?cmd=Retrieve&amp;db=nucleotide&amp;list_uids=13275414&amp;dopt=GenBank</a> |  |
| 204 | AX085557 | Dull1-like starch-synthase from patent WO 0112826            | Zea mays | 442  | 442  |      |      | 4121 | <a href="http://www.ncbi.nlm.nih.gov/entrez/query.fcgi?cmd=Retrieve&amp;db=nucleotide&amp;list_uids=13275593&amp;dopt=GenBank">http://www.ncbi.nlm.nih.gov/entrez/query.fcgi?cmd=Retrieve&amp;db=nucleotide&amp;list_uids=13275593&amp;dopt=GenBank</a> |  |
| 205 | AX090091 | from patent WO 0116307                                       | Zea mays | 654  |      |      |      | 654  | <a href="http://www.ncbi.nlm.nih.gov/entrez/query.fcgi?cmd=Retrieve&amp;db=nucleotide&amp;list_uids=13444052&amp;dopt=GenBank">http://www.ncbi.nlm.nih.gov/entrez/query.fcgi?cmd=Retrieve&amp;db=nucleotide&amp;list_uids=13444052&amp;dopt=GenBank</a> |  |
| 206 | AX090092 | from patent WO 0116307                                       | Zea mays | 277  |      |      |      | 277  | <a href="http://www.ncbi.nlm.nih.gov/entrez/query.fcgi?cmd=Retrieve&amp;db=nucleotide&amp;list_uids=13444053&amp;dopt=GenBank">http://www.ncbi.nlm.nih.gov/entrez/query.fcgi?cmd=Retrieve&amp;db=nucleotide&amp;list_uids=13444053&amp;dopt=GenBank</a> |  |
| 207 | AX090093 | from patent WO 0116307                                       | Zea mays | 476  |      |      |      | 476  | <a href="http://www.ncbi.nlm.nih.gov/entrez/query.fcgi?cmd=Retrieve&amp;db=nucleotide&amp;list_uids=13444054&amp;dopt=GenBank">http://www.ncbi.nlm.nih.gov/entrez/query.fcgi?cmd=Retrieve&amp;db=nucleotide&amp;list_uids=13444054&amp;dopt=GenBank</a> |  |
| 208 | AX090094 | from patent WO 0116307                                       | Zea mays | 344  |      |      |      | 344  | <a href="http://www.ncbi.nlm.nih.gov/entrez/query.fcgi?cmd=Retrieve&amp;db=nucleotide&amp;list_uids=13444055&amp;dopt=GenBank">http://www.ncbi.nlm.nih.gov/entrez/query.fcgi?cmd=Retrieve&amp;db=nucleotide&amp;list_uids=13444055&amp;dopt=GenBank</a> |  |
| 209 | AX090095 | from patent WO 0116307                                       | Zea mays | 547  |      |      |      | 547  | <a href="http://www.ncbi.nlm.nih.gov/entrez/query.fcgi?cmd=Retrieve&amp;db=nucleotide&amp;list_uids=13444056&amp;dopt=GenBank">http://www.ncbi.nlm.nih.gov/entrez/query.fcgi?cmd=Retrieve&amp;db=nucleotide&amp;list_uids=13444056&amp;dopt=GenBank</a> |  |
| 210 | AX090096 | patent WO 0116307                                            | Zea mays | 856  |      |      |      | 856  | <a href="http://www.ncbi.nlm.nih.gov/entrez/query.fcgi?cmd=Retrieve&amp;db=nucleotide&amp;list_uids=13444057&amp;dopt=GenBank">http://www.ncbi.nlm.nih.gov/entrez/query.fcgi?cmd=Retrieve&amp;db=nucleotide&amp;list_uids=13444057&amp;dopt=GenBank</a> |  |
| 211 | AX090097 | patent WO 0116307                                            | Zea mays | 1137 |      |      |      | 1137 | <a href="http://www.ncbi.nlm.nih.gov/entrez/query.fcgi?cmd=Retrieve&amp;db=nucleotide&amp;list_uids=13444058&amp;dopt=GenBank">http://www.ncbi.nlm.nih.gov/entrez/query.fcgi?cmd=Retrieve&amp;db=nucleotide&amp;list_uids=13444058&amp;dopt=GenBank</a> |  |
| 212 | AX090098 | 0116307                                                      | Zea mays | 753  |      |      |      | 753  | <a href="http://www.ncbi.nlm.nih.gov/entrez/query.fcgi?cmd=Retrieve&amp;db=nucleotide&amp;list_uids=13444059&amp;dopt=GenBank">http://www.ncbi.nlm.nih.gov/entrez/query.fcgi?cmd=Retrieve&amp;db=nucleotide&amp;list_uids=13444059&amp;dopt=GenBank</a> |  |
| 213 | AX090099 | from patent WO 0116307                                       | Zea mays | 684  |      |      |      | 684  | <a href="http://www.ncbi.nlm.nih.gov/entrez/query.fcgi?cmd=Retrieve&amp;db=nucleotide&amp;list_uids=13444060&amp;dopt=GenBank">http://www.ncbi.nlm.nih.gov/entrez/query.fcgi?cmd=Retrieve&amp;db=nucleotide&amp;list_uids=13444060&amp;dopt=GenBank</a> |  |
| 214 | AX090100 | from patent WO 0116307                                       | Zea mays | 1025 |      |      |      | 1025 | <a href="http://www.ncbi.nlm.nih.gov/entrez/query.fcgi?cmd=Retrieve&amp;db=nucleotide&amp;list_uids=13444061&amp;dopt=GenBank">http://www.ncbi.nlm.nih.gov/entrez/query.fcgi?cmd=Retrieve&amp;db=nucleotide&amp;list_uids=13444061&amp;dopt=GenBank</a> |  |
| 215 | AX090101 | 0116307                                                      | Zea mays | 910  |      |      |      | 910  | <a href="http://www.ncbi.nlm.nih.gov/entrez/query.fcgi?cmd=Retrieve&amp;db=nucleotide&amp;list_uids=13444062&amp;dopt=GenBank">http://www.ncbi.nlm.nih.gov/entrez/query.fcgi?cmd=Retrieve&amp;db=nucleotide&amp;list_uids=13444062&amp;dopt=GenBank</a> |  |
| 216 | AX090102 | from patent WO 0116307                                       | Zea mays | 734  |      |      |      | 734  | <a href="http://www.ncbi.nlm.nih.gov/entrez/query.fcgi?cmd=Retrieve&amp;db=nucleotide&amp;list_uids=13444063&amp;dopt=GenBank">http://www.ncbi.nlm.nih.gov/entrez/query.fcgi?cmd=Retrieve&amp;db=nucleotide&amp;list_uids=13444063&amp;dopt=GenBank</a> |  |
| 217 | AX090103 | from patent WO 0116307                                       | Zea mays | 1129 |      |      |      | 1129 | <a href="http://www.ncbi.nlm.nih.gov/entrez/query.fcgi?cmd=Retrieve&amp;db=nucleotide&amp;list_uids=13444064&amp;dopt=GenBank">http://www.ncbi.nlm.nih.gov/entrez/query.fcgi?cmd=Retrieve&amp;db=nucleotide&amp;list_uids=13444064&amp;dopt=GenBank</a> |  |
| 218 | AX090104 | from patent WO 0116307                                       | Zea mays | 571  |      |      |      | 571  | <a href="http://www.ncbi.nlm.nih.gov/entrez/query.fcgi?cmd=Retrieve&amp;db=nucleotide&amp;list_uids=13444065&amp;dopt=GenBank">http://www.ncbi.nlm.nih.gov/entrez/query.fcgi?cmd=Retrieve&amp;db=nucleotide&amp;list_uids=13444065&amp;dopt=GenBank</a> |  |
| 219 | AX090105 | from patent WO 0116307                                       | Zea mays | 579  |      |      |      | 579  | <a href="http://www.ncbi.nlm.nih.gov/entrez/query.fcgi?cmd=Retrieve&amp;db=nucleotide&amp;list_uids=13444066&amp;dopt=GenBank">http://www.ncbi.nlm.nih.gov/entrez/query.fcgi?cmd=Retrieve&amp;db=nucleotide&amp;list_uids=13444066&amp;dopt=GenBank</a> |  |
| 220 | AX090106 | from patent WO 0116307                                       | Zea mays | 193  |      |      |      | 193  | <a href="http://www.ncbi.nlm.nih.gov/entrez/query.fcgi?cmd=Retrieve&amp;db=nucleotide&amp;list_uids=13444067&amp;dopt=GenBank">http://www.ncbi.nlm.nih.gov/entrez/query.fcgi?cmd=Retrieve&amp;db=nucleotide&amp;list_uids=13444067&amp;dopt=GenBank</a> |  |
| 262 | AX090482 | patent WO 016325                                             | Zea mays | 4735 |      |      |      | 4735 | <a href="http://www.ncbi.nlm.nih.gov/entrez/query.fcgi?cmd=Retrieve&amp;db=nucleotide&amp;list_uids=13444303&amp;dopt=GenBank">http://www.ncbi.nlm.nih.gov/entrez/query.fcgi?cmd=Retrieve&amp;db=nucleotide&amp;list_uids=13444303&amp;dopt=GenBank</a> |  |
| 294 | AX111994 | seed-specific promoter, Esr                                  | Zea mays | 265  |      |      |      | 265  | <a href="http://www.ncbi.nlm.nih.gov/entrez/query.fcgi?cmd=Retrieve&amp;db=nucleotide&amp;list_uids=13938902&amp;dopt=GenBank">http://www.ncbi.nlm.nih.gov/entrez/query.fcgi?cmd=Retrieve&amp;db=nucleotide&amp;list_uids=13938902&amp;dopt=GenBank</a> |  |
| 298 | AX151105 | 0138518                                                      | Zea mays | 2253 |      |      |      | 2253 | <a href="http://www.ncbi.nlm.nih.gov/entrez/query.fcgi?cmd=Retrieve&amp;db=nucleotide&amp;list_uids=14533370&amp;dopt=GenBank">http://www.ncbi.nlm.nih.gov/entrez/query.fcgi?cmd=Retrieve&amp;db=nucleotide&amp;list_uids=14533370&amp;dopt=GenBank</a> |  |
| 301 | D45408   | elongation factor-1 alpha                                    | Zea mays | 611  | 611  |      |      | 3062 | <a href="http://www.ncbi.nlm.nih.gov/entrez/query.fcgi?cmd=Retrieve&amp;db=nucleotide&amp;list_uids=644492&amp;dopt=GenBank">http://www.ncbi.nlm.nih.gov/entrez/query.fcgi?cmd=Retrieve&amp;db=nucleotide&amp;list_uids=644492&amp;dopt=GenBank</a>     |  |
| 302 | D63342   | cysteine protease inhibitor                                  | Zea mays | 601  | 601  |      | 334  | 2204 | <a href="http://www.ncbi.nlm.nih.gov/entrez/query.fcgi?cmd=Retrieve&amp;db=nucleotide&amp;list_uids=14981328&amp;dopt=GenBank">http://www.ncbi.nlm.nih.gov/entrez/query.fcgi?cmd=Retrieve&amp;db=nucleotide&amp;list_uids=14981328&amp;dopt=GenBank</a> |  |
| 303 | D63954   | fatty acid desaturase7                                       | Zea mays | 2178 | 2178 |      | 1977 | 4970 | <a href="http://www.ncbi.nlm.nih.gov/entrez/query.fcgi?cmd=Retrieve&amp;db=nucleotide&amp;list_uids=2446997&amp;dopt=GenBank">http://www.ncbi.nlm.nih.gov/entrez/query.fcgi?cmd=Retrieve&amp;db=nucleotide&amp;list_uids=2446997&amp;dopt=GenBank</a>   |  |
| 304 | D63956   | low temperature bZIP transcription factor, gmlip15           | Zea mays | 2273 | 2798 | 2273 | 2198 | 3794 | <a href="http://www.ncbi.nlm.nih.gov/entrez/query.fcgi?cmd=Retrieve&amp;db=nucleotide&amp;list_uids=14289166&amp;dopt=GenBank">http://www.ncbi.nlm.nih.gov/entrez/query.fcgi?cmd=Retrieve&amp;db=nucleotide&amp;list_uids=14289166&amp;dopt=GenBank</a> |  |
| 305 | E17154   | phosphoenolpyruvate carboxylase                              | Zea mays | 1297 | 1297 |      |      | 6781 | <a href="http://www.ncbi.nlm.nih.gov/entrez/query.fcgi?cmd=Retrieve&amp;db=nucleotide&amp;list_uids=5711837&amp;dopt=GenBank">http://www.ncbi.nlm.nih.gov/entrez/query.fcgi?cmd=Retrieve&amp;db=nucleotide&amp;list_uids=5711837&amp;dopt=GenBank</a>   |  |
| 307 | L05934   | catalase3                                                    | Zea mays | 2582 | 2602 | 2582 |      | 6041 | <a href="http://www.ncbi.nlm.nih.gov/entrez/query.fcgi?cmd=Retrieve&amp;db=nucleotide&amp;list_uids=168436&amp;dopt=GenBank">http://www.ncbi.nlm.nih.gov/entrez/query.fcgi?cmd=Retrieve&amp;db=nucleotide&amp;list_uids=168436&amp;dopt=GenBank</a>     |  |
| 308 | L19494   | biosynthesis                                                 | Zea mays | 759  | 812  | 759  |      | 4439 | <a href="http://www.ncbi.nlm.nih.gov/entrez/query.fcgi?cmd=Retrieve&amp;db=nucleotide&amp;list_uids=309567&amp;dopt=GenBank">http://www.ncbi.nlm.nih.gov/entrez/query.fcgi?cmd=Retrieve&amp;db=nucleotide&amp;list_uids=309567&amp;dopt=GenBank</a>     |  |
| 309 | L19495   | biosynthesis                                                 | Zea mays | 1858 | 1858 |      |      | 7040 | <a href="http://www.ncbi.nlm.nih.gov/entrez/query.fcgi?cmd=Retrieve&amp;db=nucleotide&amp;list_uids=309569&amp;dopt=GenBank">http://www.ncbi.nlm.nih.gov/entrez/query.fcgi?cmd=Retrieve&amp;db=nucleotide&amp;list_uids=309569&amp;dopt=GenBank</a>     |  |
| 310 | L27484   | calcium-dependent protein kinase CDPK                        | Zea mays | 1481 | 1736 | 1481 |      | 4130 | <a href="http://www.ncbi.nlm.nih.gov/entrez/query.fcgi?cmd=Retrieve&amp;db=nucleotide&amp;list_uids=639721&amp;dopt=GenBank">http://www.ncbi.nlm.nih.gov/entrez/query.fcgi?cmd=Retrieve&amp;db=nucleotide&amp;list_uids=639721&amp;dopt=GenBank</a>     |  |
| 311 | L29418   | sucrose synthase1                                            | Zea mays | 1153 | 2836 | 1153 |      | 8648 | <a href="http://www.ncbi.nlm.nih.gov/entrez/query.fcgi?cmd=Retrieve&amp;db=nucleotide&amp;list_uids=459894&amp;dopt=GenBank">http://www.ncbi.nlm.nih.gov/entrez/query.fcgi?cmd=Retrieve&amp;db=nucleotide&amp;list_uids=459894&amp;dopt=GenBank</a>     |  |
| 312 | L29505   | high sulfur zein                                             | Zea mays | 812  | 812  |      |      | 2123 | <a href="http://www.ncbi.nlm.nih.gov/entrez/query.fcgi?cmd=Retrieve&amp;db=nucleotide&amp;list_uids=463151&amp;dopt=GenBank">http://www.ncbi.nlm.nih.gov/entrez/query.fcgi?cmd=Retrieve&amp;db=nucleotide&amp;list_uids=463151&amp;dopt=GenBank</a>     |  |
| 313 | L32898   | sucrose synthase1                                            | Zea mays | 1013 | 1955 | 1013 | 987  | 2151 | <a href="http://www.ncbi.nlm.nih.gov/entrez/query.fcgi?cmd=Retrieve&amp;db=nucleotide&amp;list_uids=1100216&amp;dopt=GenBank">http://www.ncbi.nlm.nih.gov/entrez/query.fcgi?cmd=Retrieve&amp;db=nucleotide&amp;list_uids=1100216&amp;dopt=GenBank</a>   |  |
| 314 | L33244   | sucrose synthase 2 (Sus2)                                    | Zea mays | 1002 | 1945 | 1002 | 962  | 7341 | <a href="http://www.ncbi.nlm.nih.gov/entrez/query.fcgi?cmd=Retrieve&amp;db=nucleotide&amp;list_uids=533251&amp;dopt=GenBank">http://www.ncbi.nlm.nih.gov/entrez/query.fcgi?cmd=Retrieve&amp;db=nucleotide&amp;list_uids=533251&amp;dopt=GenBank</a>     |  |
| 315 | L44133   | Roughsheath1 homeobox-domain transcription factor            | Zea mays | 92   | 247  | 92   | 50   | 1636 | <a href="http://www.ncbi.nlm.nih.gov/entrez/query.fcgi?cmd=Retrieve&amp;db=nucleotide&amp;list_uids=1008878&amp;dopt=GenBank">http://www.ncbi.nlm.nih.gov/entrez/query.fcgi?cmd=Retrieve&amp;db=nucleotide&amp;list_uids=1008878&amp;dopt=GenBank</a>   |  |
| 316 | M13370   | histone H4 C14                                               | Zea mays | 472  | 472  |      |      | 1135 | <a href="http://www.ncbi.nlm.nih.gov/entrez/query.fcgi?cmd=Retrieve&amp;db=nucleotide&amp;list_uids=168500&amp;dopt=GenBank">http://www.ncbi.nlm.nih.gov/entrez/query.fcgi?cmd=Retrieve&amp;db=nucleotide&amp;list_uids=168500&amp;dopt=GenBank</a>     |  |
| 317 | M13377   | histone H4 C7                                                | Zea mays | 350  | 350  |      |      | 868  | <a href="http://www.ncbi.nlm.nih.gov/entrez/query.fcgi?cmd=Retrieve&amp;db=nucleotide&amp;list_uids=168502&amp;dopt=GenBank">http://www.ncbi.nlm.nih.gov/entrez/query.fcgi?cmd=Retrieve&amp;db=nucleotide&amp;list_uids=168502&amp;dopt=GenBank</a>     |  |
| 318 | M13378   | histone H4 C2                                                | Zea mays | 422  | 422  |      |      | 1001 | <a href="http://www.ncbi.nlm.nih.gov/entrez/query.fcgi?cmd=Retrieve&amp;db=nucleotide&amp;list_uids=168494&amp;dopt=GenBank">http://www.ncbi.nlm.nih.gov/entrez/query.fcgi?cmd=Retrieve&amp;db=nucleotide&amp;list_uids=168494&amp;dopt=GenBank</a>     |  |
| 319 | M13379   | histone H4 C4                                                | Zea mays | 526  | 526  |      |      | 1264 | <a href="http://www.ncbi.nlm.nih.gov/entrez/query.fcgi?cmd=Retrieve&amp;db=nucleotide&amp;list_uids=168496&amp;dopt=GenBank">http://www.ncbi.nlm.nih.gov/entrez/query.fcgi?cmd=Retrieve&amp;db=nucleotide&amp;list_uids=168496&amp;dopt=GenBank</a>     |  |
| 320 | M16066   | glutein2                                                     | Zea mays | 524  | 596  | 524  |      | 1857 | <a href="http://www.ncbi.nlm.nih.gov/entrez/query.fcgi?cmd=Retrieve&amp;db=nucleotide&amp;list_uids=168484&amp;dopt=GenBank">http://www.ncbi.nlm.nih.gov/entrez/query.fcgi?cmd=Retrieve&amp;db=nucleotide&amp;list_uids=168484&amp;dopt=GenBank</a>     |  |
| 322 | M23537   | 10-kDa zein                                                  | Zea mays | 1082 | 1137 | 1082 | 1044 | 2562 | <a href="http://www.ncbi.nlm.nih.gov/entrez/query.fcgi?cmd=Retrieve&amp;db=nucleotide&amp;list_uids=340933&amp;dopt=GenBank">http://www.ncbi.nlm.nih.gov/entrez/query.fcgi?cmd=Retrieve&amp;db=nucleotide&amp;list_uids=340933&amp;dopt=GenBank</a>     |  |
| 324 | M36658   | histone H4 C3                                                | Zea mays | 460  | 546  | 460  |      | 1177 | <a href="http://www.ncbi.nlm.nih.gov/entrez/query.fcgi?cmd=Retrieve&amp;db=nucleotide&amp;list_uids=168492&amp;dopt=GenBank">http://www.ncbi.nlm.nih.gov/entrez/query.fcgi?cmd=Retrieve&amp;db=nucleotide&amp;list_uids=168492&amp;dopt=GenBank</a>     |  |
| 325 | M36659   | histone H4 C13                                               | Zea mays | 258  | 338  | 258  |      | 949  | <a href="http://www.ncbi.nlm.nih.gov/entrez/query.fcgi?cmd=Retrieve&amp;db=nucleotide&amp;list_uids=168498&amp;dopt=GenBank">http://www.ncbi.nlm.nih.gov/entrez/query.fcgi?cmd=Retrieve&amp;db=nucleotide&amp;list_uids=168498&amp;dopt=GenBank</a>     |  |
| 326 | M37153   | C1 myb-homolog, regulatory gene for anthocyanin biosynthesis | Zea mays | 1078 | 1078 |      | 1061 | 4059 | <a href="http://www.ncbi.nlm.nih.gov/entrez/query.fcgi?cmd=Retrieve&amp;db=nucleotide&amp;list_uids=168514&amp;dopt=GenBank">http://www.ncbi.nlm.nih.gov/entrez/query.fcgi?cmd=Retrieve&amp;db=nucleotide&amp;list_uids=168514&amp;dopt=GenBank</a>     |  |
| 327 | M58655   | C4 orthophosphate dikinase (PPDK)                            | Zea mays | 1732 | 1732 |      |      | 1987 | <a href="http://www.ncbi.nlm.nih.gov/entrez/query.fcgi?cmd=Retrieve&amp;db=nucleotide&amp;list_uids=168583&amp;dopt=GenBank">http://www.ncbi.nlm.nih.gov/entrez/query.fcgi?cmd=Retrieve&amp;db=nucleotide&amp;list_uids=168583&amp;dopt=GenBank</a>     |  |
| 328 | M60171   | alpha 3-tubulin                                              | Zea mays | 1177 | 1177 |      |      | 4397 | <a href="http://www.ncbi.nlm.nih.gov/entrez/query.fcgi?cmd=Retrieve&amp;db=nucleotide&amp;list_uids=485376&amp;dopt=GenBank">http://www.ncbi.nlm.nih.gov/entrez/query.fcgi?cmd=Retrieve&amp;db=nucleotide&amp;list_uids=485376&amp;dopt=GenBank</a>     |  |
| 329 | M68937   | ubiquitin fusion protein UBF9                                | Zea mays | 827  | 907  | 827  | 783  | 1624 | <a href="http://www.ncbi.nlm.nih.gov/entrez/query.fcgi?cmd=Retrieve&amp;db=nucleotide&amp;list_uids=168650&amp;dopt=GenBank">http://www.ncbi.nlm.nih.gov/entrez/query.fcgi?cmd=Retrieve&amp;db=nucleotide&amp;list_uids=168650&amp;dopt=GenBank</a>     |  |
| 330 | M81603   | shrunken-2, ADP-glucose pyrophosphorylase large subunit      | Zea mays | 1021 | 1545 | 1021 |      | 7320 | <a href="http://www.ncbi.nlm.nih.gov/entrez/query.fcgi?cmd=Retrieve&amp;db=nucleotide&amp;list_uids=168654&amp;dopt=GenBank">http://www.ncbi.nlm.nih.gov/entrez/query.fcgi?cmd=Retrieve&amp;db=nucleotide&amp;list_uids=168654&amp;dopt=GenBank</a>     |  |
| 331 | M87020   | chlorophyll a/b binding protein (cab-m1)                     | Zea mays | 1027 | 1027 |      |      | 1057 | <a href="http://www.ncbi.nlm.nih.gov/entrez/query.fcgi?cmd=Retrieve&amp;db=nucleotide&amp;list_uids=168438&amp;dopt=GenBank">http://www.ncbi.nlm.nih.gov/entrez/query.fcgi?cmd=Retrieve&amp;db=nucleotide&amp;list_uids=168438&amp;dopt=GenBank</a>     |  |
| 332 | S42508   | ribulose bis-phosphate carboxylase small subunit (rbcS Zm1)  | Zea mays | 626  | 626  |      |      | 655  | <a href="http://www.ncbi.nlm.nih.gov/entrez/query.fcgi?cmd=Retrieve&amp;db=nucleotide&amp;list_uids=253496&amp;dopt=GenBank">http://www.ncbi.nlm.nih.gov/entrez/query.fcgi?cmd=Retrieve&amp;db=nucleotide&amp;list_uids=253496&amp;dopt=GenBank</a>     |  |

|     |        |                                                             |          |      |      |      |      |     |      |                                                                                                                                                                                                                                                       |
|-----|--------|-------------------------------------------------------------|----------|------|------|------|------|-----|------|-------------------------------------------------------------------------------------------------------------------------------------------------------------------------------------------------------------------------------------------------------|
| 333 | S42568 | ribulose bis-phosphate carboxylase small subunit (rbcS Zm3) | Zea mays | 512  | 512  |      |      |     | 541  | <a href="http://www.ncbi.nlm.nih.gov/entrez/query.fcgi?cmd=Retrieve&amp;db=nucleotide&amp;list_uids=253497&amp;dopt=GenBank">http://www.ncbi.nlm.nih.gov/entrez/query.fcgi?cmd=Retrieve&amp;db=nucleotide&amp;list_uids=253497&amp;dopt=GenBank</a>   |
| 334 | S46964 | cytosolic orthophosphate dikinase, CypdkZm1                 | Zea mays | 719  | 719  |      |      |     | 974  | <a href="http://www.ncbi.nlm.nih.gov/entrez/query.fcgi?cmd=Retrieve&amp;db=nucleotide&amp;list_uids=257803&amp;dopt=GenBank">http://www.ncbi.nlm.nih.gov/entrez/query.fcgi?cmd=Retrieve&amp;db=nucleotide&amp;list_uids=257803&amp;dopt=GenBank</a>   |
| 336 | S46966 | cytosolic orthophosphate dikinase, CypdkZm1                 | Zea mays | 519  | 519  |      |      |     | 895  | <a href="http://www.ncbi.nlm.nih.gov/entrez/query.fcgi?cmd=Retrieve&amp;db=nucleotide&amp;list_uids=257807&amp;dopt=GenBank">http://www.ncbi.nlm.nih.gov/entrez/query.fcgi?cmd=Retrieve&amp;db=nucleotide&amp;list_uids=257807&amp;dopt=GenBank</a>   |
| 337 | S46967 | cytosolic orthophosphate dikinase, CypdkZm2                 | Zea mays | 502  | 502  |      |      |     | 871  | <a href="http://www.ncbi.nlm.nih.gov/entrez/query.fcgi?cmd=Retrieve&amp;db=nucleotide&amp;list_uids=257809&amp;dopt=GenBank">http://www.ncbi.nlm.nih.gov/entrez/query.fcgi?cmd=Retrieve&amp;db=nucleotide&amp;list_uids=257809&amp;dopt=GenBank</a>   |
| 338 | S59778 | heat shock protein 18-1                                     | Zea mays | 301  | 301  |      |      |     | 303  | <a href="http://www.ncbi.nlm.nih.gov/entrez/query.fcgi?cmd=Retrieve&amp;db=nucleotide&amp;list_uids=300080&amp;dopt=GenBank">http://www.ncbi.nlm.nih.gov/entrez/query.fcgi?cmd=Retrieve&amp;db=nucleotide&amp;list_uids=300080&amp;dopt=GenBank</a>   |
| 339 | S59779 | heat shock protein 18-3                                     | Zea mays | 301  | 301  |      |      |     | 303  | <a href="http://www.ncbi.nlm.nih.gov/entrez/query.fcgi?cmd=Retrieve&amp;db=nucleotide&amp;list_uids=300081&amp;dopt=GenBank">http://www.ncbi.nlm.nih.gov/entrez/query.fcgi?cmd=Retrieve&amp;db=nucleotide&amp;list_uids=300081&amp;dopt=GenBank</a>   |
| 340 | S59780 | heat shock protein 82                                       | Zea mays | 685  | 685  |      |      |     | 3468 | <a href="http://www.ncbi.nlm.nih.gov/entrez/query.fcgi?cmd=Retrieve&amp;db=nucleotide&amp;list_uids=300082&amp;dopt=GenBank">http://www.ncbi.nlm.nih.gov/entrez/query.fcgi?cmd=Retrieve&amp;db=nucleotide&amp;list_uids=300082&amp;dopt=GenBank</a>   |
| 341 | S60262 | phosphoenolpyruvate carboxylase Zm1                         | Zea mays | 634  | 634  |      |      |     | 813  | <a href="http://www.ncbi.nlm.nih.gov/entrez/query.fcgi?cmd=Retrieve&amp;db=nucleotide&amp;list_uids=303288&amp;dopt=GenBank">http://www.ncbi.nlm.nih.gov/entrez/query.fcgi?cmd=Retrieve&amp;db=nucleotide&amp;list_uids=303288&amp;dopt=GenBank</a>   |
| 342 | S60264 | phosphoenolpyruvate carboxylase Zm3B                        | Zea mays | 238  | 238  |      |      |     | 370  | <a href="http://www.ncbi.nlm.nih.gov/entrez/query.fcgi?cmd=Retrieve&amp;db=nucleotide&amp;list_uids=303290&amp;dopt=GenBank">http://www.ncbi.nlm.nih.gov/entrez/query.fcgi?cmd=Retrieve&amp;db=nucleotide&amp;list_uids=303290&amp;dopt=GenBank</a>   |
| 344 | S77135 | general regulatory factor 14-3-3 protein GF14-12            | Zea mays | 805  |      | 805  |      |     | 825  | <a href="http://www.ncbi.nlm.nih.gov/entrez/query.fcgi?cmd=Retrieve&amp;db=nucleotide&amp;list_uids=99841&amp;dopt=GenBank">http://www.ncbi.nlm.nih.gov/entrez/query.fcgi?cmd=Retrieve&amp;db=nucleotide&amp;list_uids=99841&amp;dopt=GenBank</a>     |
| 345 | U09989 | proton ATPase Mha1                                          | Zea mays | 1446 | 1446 |      |      |     | 9285 | <a href="http://www.ncbi.nlm.nih.gov/entrez/query.fcgi?cmd=Retrieve&amp;db=nucleotide&amp;list_uids=507770&amp;dopt=GenBank">http://www.ncbi.nlm.nih.gov/entrez/query.fcgi?cmd=Retrieve&amp;db=nucleotide&amp;list_uids=507770&amp;dopt=GenBank</a>   |
| 346 | U13701 | oleosin 16-kD, L3                                           | Zea mays | 503  | 503  |      |      |     | 1470 | <a href="http://www.ncbi.nlm.nih.gov/entrez/query.fcgi?cmd=Retrieve&amp;db=nucleotide&amp;list_uids=687244&amp;dopt=GenBank">http://www.ncbi.nlm.nih.gov/entrez/query.fcgi?cmd=Retrieve&amp;db=nucleotide&amp;list_uids=687244&amp;dopt=GenBank</a>   |
| 347 | U13702 | oleosin 17-kD                                               | Zea mays | 451  | 451  |      |      |     | 1911 | <a href="http://www.ncbi.nlm.nih.gov/entrez/query.fcgi?cmd=Retrieve&amp;db=nucleotide&amp;list_uids=687246&amp;dopt=GenBank">http://www.ncbi.nlm.nih.gov/entrez/query.fcgi?cmd=Retrieve&amp;db=nucleotide&amp;list_uids=687246&amp;dopt=GenBank</a>   |
| 348 | U14599 | Bronze-2 glutathione-S-transferase                          | Zea mays | 637  | 719  | 637  |      |     | 1696 | <a href="http://www.ncbi.nlm.nih.gov/entrez/query.fcgi?cmd=Retrieve&amp;db=nucleotide&amp;list_uids=549989&amp;dopt=GenBank">http://www.ncbi.nlm.nih.gov/entrez/query.fcgi?cmd=Retrieve&amp;db=nucleotide&amp;list_uids=549989&amp;dopt=GenBank</a>   |
| 349 | U20450 | nitrate reductase                                           | Zea mays | 1318 | 1318 |      | 1181 |     | 4985 | <a href="http://www.ncbi.nlm.nih.gov/entrez/query.fcgi?cmd=Retrieve&amp;db=nucleotide&amp;list_uids=676849&amp;dopt=GenBank">http://www.ncbi.nlm.nih.gov/entrez/query.fcgi?cmd=Retrieve&amp;db=nucleotide&amp;list_uids=676849&amp;dopt=GenBank</a>   |
| 351 | U31541 | high methionine zein dzs18                                  | Zea mays | 744  | 744  |      |      |     | 1676 | <a href="http://www.ncbi.nlm.nih.gov/entrez/query.fcgi?cmd=Retrieve&amp;db=nucleotide&amp;list_uids=984524&amp;dopt=GenBank">http://www.ncbi.nlm.nih.gov/entrez/query.fcgi?cmd=Retrieve&amp;db=nucleotide&amp;list_uids=984524&amp;dopt=GenBank</a>   |
| 352 | U32636 | phytoene synthase Y1                                        | Zea mays | 1921 | 1934 | 1921 |      |     | 5995 | <a href="http://www.ncbi.nlm.nih.gov/entrez/query.fcgi?cmd=Retrieve&amp;db=nucleotide&amp;list_uids=109866&amp;dopt=GenBank">http://www.ncbi.nlm.nih.gov/entrez/query.fcgi?cmd=Retrieve&amp;db=nucleotide&amp;list_uids=109866&amp;dopt=GenBank</a>   |
| 353 | U34726 | superoxide dismutase 4                                      | Zea mays | 2221 | 2221 |      |      |     | 3039 | <a href="http://www.ncbi.nlm.nih.gov/entrez/query.fcgi?cmd=Retrieve&amp;db=nucleotide&amp;list_uids=1574937&amp;dopt=GenBank">http://www.ncbi.nlm.nih.gov/entrez/query.fcgi?cmd=Retrieve&amp;db=nucleotide&amp;list_uids=1574937&amp;dopt=GenBank</a> |
| 354 | J05212 | oleosin, 18-kD L2                                           | Zea mays | 1390 | 1487 | 1390 |      |     | 3101 | <a href="http://www.ncbi.nlm.nih.gov/entrez/query.fcgi?cmd=Retrieve&amp;db=nucleotide&amp;list_uids=168508&amp;dopt=GenBank">http://www.ncbi.nlm.nih.gov/entrez/query.fcgi?cmd=Retrieve&amp;db=nucleotide&amp;list_uids=168508&amp;dopt=GenBank</a>   |
| 355 | U45858 | glyceraldehyde-3-phosphate dehydrogenase gpc2               | Zea mays | 429  | 505  | 429  |      |     | 4590 | <a href="http://www.ncbi.nlm.nih.gov/entrez/query.fcgi?cmd=Retrieve&amp;db=nucleotide&amp;list_uids=1185553&amp;dopt=GenBank">http://www.ncbi.nlm.nih.gov/entrez/query.fcgi?cmd=Retrieve&amp;db=nucleotide&amp;list_uids=1185553&amp;dopt=GenBank</a> |
| 356 | M35388 | histone H3                                                  | Zea mays | 3119 | 3188 | 3119 |      |     | 4627 | <a href="http://www.ncbi.nlm.nih.gov/entrez/query.fcgi?cmd=Retrieve&amp;db=nucleotide&amp;list_uids=168505&amp;dopt=GenBank">http://www.ncbi.nlm.nih.gov/entrez/query.fcgi?cmd=Retrieve&amp;db=nucleotide&amp;list_uids=168505&amp;dopt=GenBank</a>   |
| 357 | U57899 | biosynthesis                                                | Zea mays | 231  | 320  | 231  |      |     | 8291 | <a href="http://www.ncbi.nlm.nih.gov/entrez/query.fcgi?cmd=Retrieve&amp;db=nucleotide&amp;list_uids=1420923&amp;dopt=GenBank">http://www.ncbi.nlm.nih.gov/entrez/query.fcgi?cmd=Retrieve&amp;db=nucleotide&amp;list_uids=1420923&amp;dopt=GenBank</a> |
| 361 | X02382 | sucrose synthase                                            | Zea mays | 1142 | 2227 | 1142 | 1113 |     | 6922 | <a href="http://www.ncbi.nlm.nih.gov/entrez/query.fcgi?cmd=Retrieve&amp;db=nucleotide&amp;list_uids=22487&amp;dopt=GenBank">http://www.ncbi.nlm.nih.gov/entrez/query.fcgi?cmd=Retrieve&amp;db=nucleotide&amp;list_uids=22487&amp;dopt=GenBank</a>     |
| 362 | X03714 | heat shock protein 70                                       | Zea mays | 164  | 271  | 164  | 130  |     | 858  | <a href="http://www.ncbi.nlm.nih.gov/entrez/query.fcgi?cmd=Retrieve&amp;db=nucleotide&amp;list_uids=22344&amp;dopt=GenBank">http://www.ncbi.nlm.nih.gov/entrez/query.fcgi?cmd=Retrieve&amp;db=nucleotide&amp;list_uids=22344&amp;dopt=GenBank</a>     |
| 363 | X03935 | waxy1 granule-bound starch synthase                         | Zea mays | 901  | 1233 | 901  | 867  |     | 4800 | <a href="http://www.ncbi.nlm.nih.gov/entrez/query.fcgi?cmd=Retrieve&amp;db=nucleotide&amp;list_uids=22509&amp;dopt=GenBank">http://www.ncbi.nlm.nih.gov/entrez/query.fcgi?cmd=Retrieve&amp;db=nucleotide&amp;list_uids=22509&amp;dopt=GenBank</a>     |
| 365 | X12872 | fructose bis-phosphate aldolase                             | Zea mays | 801  | 875  | 801  | 770  |     | 3324 | <a href="http://www.ncbi.nlm.nih.gov/entrez/query.fcgi?cmd=Retrieve&amp;db=nucleotide&amp;list_uids=22144&amp;dopt=GenBank">http://www.ncbi.nlm.nih.gov/entrez/query.fcgi?cmd=Retrieve&amp;db=nucleotide&amp;list_uids=22144&amp;dopt=GenBank</a>     |
| 366 | X14579 | C4 phosphoenolpyruvate carboxylase                          | Zea mays | 1016 | 1086 | 1016 | 986  |     | 1108 | <a href="http://www.ncbi.nlm.nih.gov/entrez/query.fcgi?cmd=Retrieve&amp;db=nucleotide&amp;list_uids=22391&amp;dopt=GenBank">http://www.ncbi.nlm.nih.gov/entrez/query.fcgi?cmd=Retrieve&amp;db=nucleotide&amp;list_uids=22391&amp;dopt=GenBank</a>     |
| 367 | X14580 | C4 phosphoenolpyruvate carboxylase                          | Zea mays | 1093 | 1175 | 1093 |      |     | 1185 | <a href="http://www.ncbi.nlm.nih.gov/entrez/query.fcgi?cmd=Retrieve&amp;db=nucleotide&amp;list_uids=22392&amp;dopt=GenBank">http://www.ncbi.nlm.nih.gov/entrez/query.fcgi?cmd=Retrieve&amp;db=nucleotide&amp;list_uids=22392&amp;dopt=GenBank</a>     |
| 368 | X14581 | C4 phosphoenolpyruvate carboxylase                          | Zea mays | 1090 | 1172 | 1090 |      |     | 1182 | <a href="http://www.ncbi.nlm.nih.gov/entrez/query.fcgi?cmd=Retrieve&amp;db=nucleotide&amp;list_uids=22390&amp;dopt=GenBank">http://www.ncbi.nlm.nih.gov/entrez/query.fcgi?cmd=Retrieve&amp;db=nucleotide&amp;list_uids=22390&amp;dopt=GenBank</a>     |
| 369 | X14927 | orthophosphate dikinase PPKD1                               | Zea mays | 805  | 1017 | 805  |      |     | 1272 | <a href="http://www.ncbi.nlm.nih.gov/entrez/query.fcgi?cmd=Retrieve&amp;db=nucleotide&amp;list_uids=22449&amp;dopt=GenBank">http://www.ncbi.nlm.nih.gov/entrez/query.fcgi?cmd=Retrieve&amp;db=nucleotide&amp;list_uids=22449&amp;dopt=GenBank</a>     |
| 370 | X15239 | phosphoenolpyruvate carboxylase PEPC1                       | Zea mays | 664  | 745  | 664  | 635  |     | 6151 | <a href="http://www.ncbi.nlm.nih.gov/entrez/query.fcgi?cmd=Retrieve&amp;db=nucleotide&amp;list_uids=22407&amp;dopt=GenBank">http://www.ncbi.nlm.nih.gov/entrez/query.fcgi?cmd=Retrieve&amp;db=nucleotide&amp;list_uids=22407&amp;dopt=GenBank</a>     |
| 371 | X15544 | opaque2                                                     | Zea mays | 1549 | 1549 |      |      |     | 4761 | <a href="http://www.ncbi.nlm.nih.gov/entrez/query.fcgi?cmd=Retrieve&amp;db=nucleotide&amp;list_uids=22387&amp;dopt=GenBank">http://www.ncbi.nlm.nih.gov/entrez/query.fcgi?cmd=Retrieve&amp;db=nucleotide&amp;list_uids=22387&amp;dopt=GenBank</a>     |
| 372 | X15704 | alpha-tubulin                                               | Zea mays | 1644 | 1763 | 1644 | 1611 |     | 9244 | <a href="http://www.ncbi.nlm.nih.gov/entrez/query.fcgi?cmd=Retrieve&amp;db=nucleotide&amp;list_uids=602605&amp;dopt=GenBank">http://www.ncbi.nlm.nih.gov/entrez/query.fcgi?cmd=Retrieve&amp;db=nucleotide&amp;list_uids=602605&amp;dopt=GenBank</a>   |
| 373 | X15712 | adenine nucleotide translocator ANT-G2                      | Zea mays | 571  | 571  |      |      |     | 2098 | <a href="http://www.ncbi.nlm.nih.gov/entrez/query.fcgi?cmd=Retrieve&amp;db=nucleotide&amp;list_uids=22167&amp;dopt=GenBank">http://www.ncbi.nlm.nih.gov/entrez/query.fcgi?cmd=Retrieve&amp;db=nucleotide&amp;list_uids=22167&amp;dopt=GenBank</a>     |
| 374 | X15994 | rab17                                                       | Zea mays | 559  | 654  | 559  | 529  |     | 1986 | <a href="http://www.ncbi.nlm.nih.gov/entrez/query.fcgi?cmd=Retrieve&amp;db=nucleotide&amp;list_uids=22461&amp;dopt=GenBank">http://www.ncbi.nlm.nih.gov/entrez/query.fcgi?cmd=Retrieve&amp;db=nucleotide&amp;list_uids=22461&amp;dopt=GenBank</a>     |
| 375 | X52878 | beta 1-tubulin                                              | Zea mays | 421  | 551  | 421  | 407  |     | 2461 | <a href="http://www.ncbi.nlm.nih.gov/entrez/query.fcgi?cmd=Retrieve&amp;db=nucleotide&amp;list_uids=22180&amp;dopt=GenBank">http://www.ncbi.nlm.nih.gov/entrez/query.fcgi?cmd=Retrieve&amp;db=nucleotide&amp;list_uids=22180&amp;dopt=GenBank</a>     |
| 376 | X05068 | NADPH-dependent reductase for anthocyanin biosynthesis, A1  | Zea mays | 1758 | 1843 | 1758 | 1729 |     | 4467 | <a href="http://www.ncbi.nlm.nih.gov/entrez/query.fcgi?cmd=Retrieve&amp;db=nucleotide&amp;list_uids=22102&amp;dopt=GenBank">http://www.ncbi.nlm.nih.gov/entrez/query.fcgi?cmd=Retrieve&amp;db=nucleotide&amp;list_uids=22102&amp;dopt=GenBank</a>     |
| 377 | X56737 | auxin binding protein                                       | Zea mays | 837  | 883  | 837  | 512  |     | 5337 | <a href="http://www.ncbi.nlm.nih.gov/entrez/query.fcgi?cmd=Retrieve&amp;db=nucleotide&amp;list_uids=22174&amp;dopt=GenBank">http://www.ncbi.nlm.nih.gov/entrez/query.fcgi?cmd=Retrieve&amp;db=nucleotide&amp;list_uids=22174&amp;dopt=GenBank</a>     |
| 378 | X59138 | rab28                                                       | Zea mays | 494  | 494  |      | 352  |     | 1846 | <a href="http://www.ncbi.nlm.nih.gov/entrez/query.fcgi?cmd=Retrieve&amp;db=nucleotide&amp;list_uids=22459&amp;dopt=GenBank">http://www.ncbi.nlm.nih.gov/entrez/query.fcgi?cmd=Retrieve&amp;db=nucleotide&amp;list_uids=22459&amp;dopt=GenBank</a>     |
| 379 | X59546 | pyruvate decarboxylase                                      | Zea mays | 1415 | 1415 |      | 1261 |     | 4040 | <a href="http://www.ncbi.nlm.nih.gov/entrez/query.fcgi?cmd=Retrieve&amp;db=nucleotide&amp;list_uids=22394&amp;dopt=GenBank">http://www.ncbi.nlm.nih.gov/entrez/query.fcgi?cmd=Retrieve&amp;db=nucleotide&amp;list_uids=22394&amp;dopt=GenBank</a>     |
| 380 | X60135 | catalase1                                                   | Zea mays | 2302 | 2486 | 2302 |      |     | 6933 | <a href="http://www.ncbi.nlm.nih.gov/entrez/query.fcgi?cmd=Retrieve&amp;db=nucleotide&amp;list_uids=311238&amp;dopt=GenBank">http://www.ncbi.nlm.nih.gov/entrez/query.fcgi?cmd=Retrieve&amp;db=nucleotide&amp;list_uids=311238&amp;dopt=GenBank</a>   |
| 381 | X60205 | chalcone synthase, C2                                       | Zea mays | 618  | 855  | 618  | 583  |     | 3829 | <a href="http://www.ncbi.nlm.nih.gov/entrez/query.fcgi?cmd=Retrieve&amp;db=nucleotide&amp;list_uids=22217&amp;dopt=GenBank">http://www.ncbi.nlm.nih.gov/entrez/query.fcgi?cmd=Retrieve&amp;db=nucleotide&amp;list_uids=22217&amp;dopt=GenBank</a>     |
| 382 | X63134 | hydroxyproline-rich glycoprotein                            | Zea mays | 507  |      |      | 507  | 395 | 1954 | <a href="http://www.ncbi.nlm.nih.gov/entrez/query.fcgi?cmd=Retrieve&amp;db=nucleotide&amp;list_uids=22332&amp;dopt=GenBank">http://www.ncbi.nlm.nih.gov/entrez/query.fcgi?cmd=Retrieve&amp;db=nucleotide&amp;list_uids=22332&amp;dopt=GenBank</a>     |
| 383 | X63553 | acetohydroxyacid synthase AHAS 108                          | Zea mays | 666  | 666  |      |      |     | 2664 | <a href="http://www.ncbi.nlm.nih.gov/entrez/query.fcgi?cmd=Retrieve&amp;db=nucleotide&amp;list_uids=22138&amp;dopt=GenBank">http://www.ncbi.nlm.nih.gov/entrez/query.fcgi?cmd=Retrieve&amp;db=nucleotide&amp;list_uids=22138&amp;dopt=GenBank</a>     |
| 384 | X63554 | acetohydroxyacid synthase AHAS 109                          | Zea mays | 608  | 608  |      |      |     | 2544 | <a href="http://www.ncbi.nlm.nih.gov/entrez/query.fcgi?cmd=Retrieve&amp;db=nucleotide&amp;list_uids=22140&amp;dopt=GenBank">http://www.ncbi.nlm.nih.gov/entrez/query.fcgi?cmd=Retrieve&amp;db=nucleotide&amp;list_uids=22140&amp;dopt=GenBank</a>     |
| 385 | X63869 | phosphoenolpyruvate carboxylase Zm2A                        | Zea mays | 446  | 446  |      |      |     | 601  | <a href="http://www.ncbi.nlm.nih.gov/entrez/query.fcgi?cmd=Retrieve&amp;db=nucleotide&amp;list_uids=22409&amp;dopt=GenBank">http://www.ncbi.nlm.nih.gov/entrez/query.fcgi?cmd=Retrieve&amp;db=nucleotide&amp;list_uids=22409&amp;dopt=GenBank</a>     |
| 386 | X65844 | polygalacturonase (PG6)                                     | Zea mays | 509  | 509  |      |      |     | 2213 | <a href="http://www.ncbi.nlm.nih.gov/entrez/query.fcgi?cmd=Retrieve&amp;db=nucleotide&amp;list_uids=288373&amp;dopt=GenBank">http://www.ncbi.nlm.nih.gov/entrez/query.fcgi?cmd=Retrieve&amp;db=nucleotide&amp;list_uids=288373&amp;dopt=GenBank</a>   |
| 387 | X65845 | polygalacturonase (PG14)                                    | Zea mays | 697  | 697  |      |      |     | 2407 | <a href="http://www.ncbi.nlm.nih.gov/entrez/query.fcgi?cmd=Retrieve&amp;db=nucleotide&amp;list_uids=288366&amp;dopt=GenBank">http://www.ncbi.nlm.nih.gov/entrez/query.fcgi?cmd=Retrieve&amp;db=nucleotide&amp;list_uids=288366&amp;dopt=GenBank</a>   |
| 389 | Z54358 | catalase2                                                   | Zea mays | 1630 |      | 1630 | 1586 |     | 3662 | <a href="http://www.ncbi.nlm.nih.gov/entrez/query.fcgi?cmd=Retrieve&amp;db=nucleotide&amp;list_uids=153696&amp;dopt=GenBank">http://www.ncbi.nlm.nih.gov/entrez/query.fcgi?cmd=Retrieve&amp;db=nucleotide&amp;list_uids=153696&amp;dopt=GenBank</a>   |
| 390 | X66422 | polygalacturonase                                           | Zea mays | 1213 | 1213 |      |      |     | 3726 | <a href="http://www.ncbi.nlm.nih.gov/entrez/query.fcgi?cmd=Retrieve&amp;db=nucleotide&amp;list_uids=28861&amp;dopt=GenBank">http://www.ncbi.nlm.nih.gov/entrez/query.fcgi?cmd=Retrieve&amp;db=nucleotide&amp;list_uids=28861&amp;dopt=GenBank</a>     |
| 391 | X66692 | polygalacturonase                                           | Zea mays | 2683 | 2871 | 2683 | 2648 |     | 3788 | <a href="http://www.ncbi.nlm.nih.gov/entrez/query.fcgi?cmd=Retrieve&amp;db=nucleotide&amp;list_uids=287829&amp;dopt=GenBank">http://www.ncbi.nlm.nih.gov/entrez/query.fcgi?cmd=Retrieve&amp;db=nucleotide&amp;list_uids=287829&amp;dopt=GenBank</a>   |
| 392 | X67733 | receptor-like protein kinase PK1                            | Zea mays | 1727 | 1727 |      | 1552 |     | 4487 | <a href="http://www.ncbi.nlm.nih.gov/entrez/query.fcgi?cmd=Retrieve&amp;db=nucleotide&amp;list_uids=22435&amp;dopt=GenBank">http://www.ncbi.nlm.nih.gov/entrez/query.fcgi?cmd=Retrieve&amp;db=nucleotide&amp;list_uids=22435&amp;dopt=GenBank</a>     |
| 393 | X68678 | cyclophilin                                                 | Zea mays | 847  | 1062 | 847  | 773  |     | 2598 | <a href="http://www.ncbi.nlm.nih.gov/entrez/query.fcgi?cmd=Retrieve&amp;db=nucleotide&amp;list_uids=629147&amp;dopt=GenBank">http://www.ncbi.nlm.nih.gov/entrez/query.fcgi?cmd=Retrieve&amp;db=nucleotide&amp;list_uids=629147&amp;dopt=GenBank</a>   |
| 394 | X69961 | histone H2B                                                 | Zea mays | 965  | 965  |      |      |     | 2361 | <a href="http://www.ncbi.nlm.nih.gov/entrez/query.fcgi?cmd=Retrieve&amp;db=nucleotide&amp;list_uids=577818&amp;dopt=GenBank">http://www.ncbi.nlm.nih.gov/entrez/query.fcgi?cmd=Retrieve&amp;db=nucleotide&amp;list_uids=577818&amp;dopt=GenBank</a>   |
| 395 | X76713 | tryptophan synthaseA                                        | Zea mays | 1726 | 1839 | 1726 |      |     | 4796 | <a href="http://www.ncbi.nlm.nih.gov/entrez/query.fcgi?cmd=Retrieve&amp;db=nucleotide&amp;list_uids=440170&amp;dopt=GenBank">http://www.ncbi.nlm.nih.gov/entrez/query.fcgi?cmd=Retrieve&amp;db=nucleotide&amp;list_uids=440170&amp;dopt=GenBank</a>   |
| 396 | X78337 | pathogenesis-related protein PRms                           | Zea mays | 737  |      | 737  | 705  |     | 789  | <a href="http://www.ncbi.nlm.nih.gov/entrez/query.fcgi?cmd=Retrieve&amp;db=nucleotide&amp;list_uids=619576&amp;dopt=GenBank">http://www.ncbi.nlm.nih.gov/entrez/query.fcgi?cmd=Retrieve&amp;db=nucleotide&amp;list_uids=619576&amp;dopt=GenBank</a>   |
| 399 | X78988 | proteinase inhibitor                                        | Zea mays | 691  | 895  | 691  | 668  |     | 1262 | <a href="http://www.ncbi.nlm.nih.gov/entrez/query.fcgi?cmd=Retrieve&amp;db=nucleotide&amp;list_uids=9909975&amp;dopt=GenBank">http://www.ncbi.nlm.nih.gov/entrez/query.fcgi?cmd=Retrieve&amp;db=nucleotide&amp;list_uids=9909975&amp;dopt=GenBank</a> |
| 401 | X80206 | ZAG2                                                        | Zea mays | 2133 | 2133 |      |      |     | 7071 | <a href="http://www.ncbi.nlm.nih.gov/entrez/query.fcgi?cmd=Retrieve&amp;db=nucleotide&amp;list_uids=940880&amp;dopt=GenBank">http://www.ncbi.nlm.nih.gov/entrez/query.fcgi?cmd=Retrieve&amp;db=nucleotide&amp;list_uids=940880&amp;dopt=GenBank</a>   |
| 402 | X81199 | ZMM1                                                        | Zea mays | 2198 | 2198 |      | 714  |     | 5537 | <a href="http://www.ncbi.nlm.nih.gov/entrez/query.fcgi?cmd=Retrieve&amp;db=nucleotide&amp;list_uids=854644&amp;dopt=GenBank">http://www.ncbi.nlm.nih.gov/entrez/query.fcgi?cmd=Retrieve&amp;db=nucleotide&amp;list_uids=854644&amp;dopt=GenBank</a>   |

|     |          |                                                          |          |      |      |      |      |       |                                                                                                                                                                                                                                                         |
|-----|----------|----------------------------------------------------------|----------|------|------|------|------|-------|---------------------------------------------------------------------------------------------------------------------------------------------------------------------------------------------------------------------------------------------------------|
| 403 | X81828   | cytochrome P-450 cyp71c1                                 | Zea mays | 2133 | 2133 |      | 2018 | 4352  | <a href="http://www.ncbi.nlm.nih.gov/entrez/query.fcgi?cmd=Retrieve&amp;db=nucleotide&amp;list_uids=550433&amp;dopt=GenBank">http://www.ncbi.nlm.nih.gov/entrez/query.fcgi?cmd=Retrieve&amp;db=nucleotide&amp;list_uids=550433&amp;dopt=GenBank</a>     |
| 404 | X83076   | ferritin1                                                | Zea mays | 976  | 976  |      | 842  | 3294  | <a href="http://www.ncbi.nlm.nih.gov/entrez/query.fcgi?cmd=Retrieve&amp;db=nucleotide&amp;list_uids=1103629&amp;dopt=GenBank">http://www.ncbi.nlm.nih.gov/entrez/query.fcgi?cmd=Retrieve&amp;db=nucleotide&amp;list_uids=1103629&amp;dopt=GenBank</a>   |
| 405 | X83077   | ferritin2                                                | Zea mays | 920  | 920  |      | 800  | 2902  | <a href="http://www.ncbi.nlm.nih.gov/entrez/query.fcgi?cmd=Retrieve&amp;db=nucleotide&amp;list_uids=1103629&amp;dopt=GenBank">http://www.ncbi.nlm.nih.gov/entrez/query.fcgi?cmd=Retrieve&amp;db=nucleotide&amp;list_uids=1103629&amp;dopt=GenBank</a>   |
| 406 | X84376   | histone H4                                               | Zea mays | 335  | 335  |      |      | 1029  | <a href="http://www.ncbi.nlm.nih.gov/entrez/query.fcgi?cmd=Retrieve&amp;db=nucleotide&amp;list_uids=886739&amp;dopt=GenBank">http://www.ncbi.nlm.nih.gov/entrez/query.fcgi?cmd=Retrieve&amp;db=nucleotide&amp;list_uids=886739&amp;dopt=GenBank</a>     |
| 407 | X84377   | histone H3                                               | Zea mays | 385  | 385  |      |      | 1119  | <a href="http://www.ncbi.nlm.nih.gov/entrez/query.fcgi?cmd=Retrieve&amp;db=nucleotide&amp;list_uids=886737&amp;dopt=GenBank">http://www.ncbi.nlm.nih.gov/entrez/query.fcgi?cmd=Retrieve&amp;db=nucleotide&amp;list_uids=886737&amp;dopt=GenBank</a>     |
| 408 | X88779   | glossy2 gene associated with epicuticular wax synthesis  | Zea mays | 1979 | 2152 | 1979 |      | 6343  | <a href="http://www.ncbi.nlm.nih.gov/entrez/query.fcgi?cmd=Retrieve&amp;db=nucleotide&amp;list_uids=949979&amp;dopt=GenBank">http://www.ncbi.nlm.nih.gov/entrez/query.fcgi?cmd=Retrieve&amp;db=nucleotide&amp;list_uids=949979&amp;dopt=GenBank</a>     |
| 409 | X90652   | TATA-binding protein1                                    | Zea mays | 1483 | 1667 | 1483 |      | 7497  | <a href="http://www.ncbi.nlm.nih.gov/entrez/query.fcgi?cmd=Retrieve&amp;db=nucleotide&amp;list_uids=945021&amp;dopt=GenBank">http://www.ncbi.nlm.nih.gov/entrez/query.fcgi?cmd=Retrieve&amp;db=nucleotide&amp;list_uids=945021&amp;dopt=GenBank</a>     |
| 410 | X91882   | MADS-box gene expressed in endosperm, ZEMa               | Zea mays | 1142 | 1352 | 1142 |      | 4475  | <a href="http://www.ncbi.nlm.nih.gov/entrez/query.fcgi?cmd=Retrieve&amp;db=nucleotide&amp;list_uids=1213276&amp;dopt=GenBank">http://www.ncbi.nlm.nih.gov/entrez/query.fcgi?cmd=Retrieve&amp;db=nucleotide&amp;list_uids=1213276&amp;dopt=GenBank</a>   |
| 411 | X91883   | MADS-box gene expressed in endosperm, ZEMb               | Zea mays | 1044 |      | 1044 |      | 2362  | <a href="http://www.ncbi.nlm.nih.gov/entrez/query.fcgi?cmd=Retrieve&amp;db=nucleotide&amp;list_uids=1213278&amp;dopt=GenBank">http://www.ncbi.nlm.nih.gov/entrez/query.fcgi?cmd=Retrieve&amp;db=nucleotide&amp;list_uids=1213278&amp;dopt=GenBank</a>   |
| 412 | X96758   | clathrin coat assembly protein                           | Zea mays | 155  | 155  |      |      | 887   | <a href="http://www.ncbi.nlm.nih.gov/entrez/query.fcgi?cmd=Retrieve&amp;db=nucleotide&amp;list_uids=2959357&amp;dopt=GenBank">http://www.ncbi.nlm.nih.gov/entrez/query.fcgi?cmd=Retrieve&amp;db=nucleotide&amp;list_uids=2959357&amp;dopt=GenBank</a>   |
| 413 | X97570   | defective kernel 34                                      | Zea mays | 876  | 876  |      |      | 5267  | <a href="http://www.ncbi.nlm.nih.gov/entrez/query.fcgi?cmd=Retrieve&amp;db=nucleotide&amp;list_uids=1628481&amp;dopt=GenBank">http://www.ncbi.nlm.nih.gov/entrez/query.fcgi?cmd=Retrieve&amp;db=nucleotide&amp;list_uids=1628481&amp;dopt=GenBank</a>   |
| 414 | Y11368   | cytochrome P-450 cyp71c4                                 | Zea mays | 2740 | 2910 | 2740 |      | 7466  | <a href="http://www.ncbi.nlm.nih.gov/entrez/query.fcgi?cmd=Retrieve&amp;db=nucleotide&amp;list_uids=1850902&amp;dopt=GenBank">http://www.ncbi.nlm.nih.gov/entrez/query.fcgi?cmd=Retrieve&amp;db=nucleotide&amp;list_uids=1850902&amp;dopt=GenBank</a>   |
| 415 | Y11403   | cytochrome P-450 cyp71c3                                 | Zea mays | 2171 | 2203 | 2171 |      | 5057  | <a href="http://www.ncbi.nlm.nih.gov/entrez/query.fcgi?cmd=Retrieve&amp;db=nucleotide&amp;list_uids=1870202&amp;dopt=GenBank">http://www.ncbi.nlm.nih.gov/entrez/query.fcgi?cmd=Retrieve&amp;db=nucleotide&amp;list_uids=1870202&amp;dopt=GenBank</a>   |
| 416 | Y11404   | cytochrome P-450 cyp71c2                                 | Zea mays | 380  | 380  |      |      | 3130  | <a href="http://www.ncbi.nlm.nih.gov/entrez/query.fcgi?cmd=Retrieve&amp;db=nucleotide&amp;list_uids=1870200&amp;dopt=GenBank">http://www.ncbi.nlm.nih.gov/entrez/query.fcgi?cmd=Retrieve&amp;db=nucleotide&amp;list_uids=1870200&amp;dopt=GenBank</a>   |
| 417 | Y11649   | protein kinase CK2 alpha subunit                         | Zea mays | 1663 | 1663 |      | 1041 | 7516  | <a href="http://www.ncbi.nlm.nih.gov/entrez/query.fcgi?cmd=Retrieve&amp;db=nucleotide&amp;list_uids=3821794&amp;dopt=GenBank">http://www.ncbi.nlm.nih.gov/entrez/query.fcgi?cmd=Retrieve&amp;db=nucleotide&amp;list_uids=3821794&amp;dopt=GenBank</a>   |
| 418 | Y13733   | cinnamyl alcohol dehydrogenase                           | Zea mays | 128  | 128  |      |      | 1516  | <a href="http://www.ncbi.nlm.nih.gov/entrez/query.fcgi?cmd=Retrieve&amp;db=nucleotide&amp;list_uids=2239257&amp;dopt=GenBank">http://www.ncbi.nlm.nih.gov/entrez/query.fcgi?cmd=Retrieve&amp;db=nucleotide&amp;list_uids=2239257&amp;dopt=GenBank</a>   |
| 419 | Z11754   | lactate dehydrogenase                                    | Zea mays | 1166 | 1166 |      |      | 2999  | <a href="http://www.ncbi.nlm.nih.gov/entrez/query.fcgi?cmd=Retrieve&amp;db=nucleotide&amp;list_uids=22352&amp;dopt=GenBank">http://www.ncbi.nlm.nih.gov/entrez/query.fcgi?cmd=Retrieve&amp;db=nucleotide&amp;list_uids=22352&amp;dopt=GenBank</a>       |
| 420 | Z22760   | Ferrodoxin-NADP reductase                                | Zea mays | 899  | 899  |      |      | 2278  | <a href="http://www.ncbi.nlm.nih.gov/entrez/query.fcgi?cmd=Retrieve&amp;db=nucleotide&amp;list_uids=396148&amp;dopt=GenBank">http://www.ncbi.nlm.nih.gov/entrez/query.fcgi?cmd=Retrieve&amp;db=nucleotide&amp;list_uids=396148&amp;dopt=GenBank</a>     |
| 421 | Z26824   | chalcone isomerase                                       | Zea mays | 693  | 693  |      | 601  | 1760  | <a href="http://www.ncbi.nlm.nih.gov/entrez/query.fcgi?cmd=Retrieve&amp;db=nucleotide&amp;list_uids=407028&amp;dopt=GenBank">http://www.ncbi.nlm.nih.gov/entrez/query.fcgi?cmd=Retrieve&amp;db=nucleotide&amp;list_uids=407028&amp;dopt=GenBank</a>     |
| 422 | Z33611   | phosphoglycerate mutase                                  | Zea mays | 881  | 881  |      |      | 1110  | <a href="http://www.ncbi.nlm.nih.gov/entrez/query.fcgi?cmd=Retrieve&amp;db=nucleotide&amp;list_uids=551287&amp;dopt=GenBank">http://www.ncbi.nlm.nih.gov/entrez/query.fcgi?cmd=Retrieve&amp;db=nucleotide&amp;list_uids=551287&amp;dopt=GenBank</a>     |
| 423 | AJ131374 | HMG protein c1                                           | Zea mays | 1180 | 1180 |      |      | 2929  | <a href="http://www.ncbi.nlm.nih.gov/entrez/query.fcgi?cmd=Retrieve&amp;db=nucleotide&amp;list_uids=5441503&amp;dopt=GenBank">http://www.ncbi.nlm.nih.gov/entrez/query.fcgi?cmd=Retrieve&amp;db=nucleotide&amp;list_uids=5441503&amp;dopt=GenBank</a>   |
| 424 | AJ131535 | hydroxyproline-rich glycoprotein                         | Zea mays | 2183 | 2183 |      | 2071 | 3735  | <a href="http://www.ncbi.nlm.nih.gov/entrez/query.fcgi?cmd=Retrieve&amp;db=nucleotide&amp;list_uids=4007864&amp;dopt=GenBank">http://www.ncbi.nlm.nih.gov/entrez/query.fcgi?cmd=Retrieve&amp;db=nucleotide&amp;list_uids=4007864&amp;dopt=GenBank</a>   |
| 425 | AJ132240 | elongation initiation factor-5 (eIF-5)                   | Zea mays | 1902 | 3545 | 1902 | 1645 | 6831  | <a href="http://www.ncbi.nlm.nih.gov/entrez/query.fcgi?cmd=Retrieve&amp;db=nucleotide&amp;list_uids=4160401&amp;dopt=GenBank">http://www.ncbi.nlm.nih.gov/entrez/query.fcgi?cmd=Retrieve&amp;db=nucleotide&amp;list_uids=4160401&amp;dopt=GenBank</a>   |
| 426 | AJ223470 | acidic phytase I                                         | Zea mays | 1934 | 2097 | 1934 |      | 4695  | <a href="http://www.ncbi.nlm.nih.gov/entrez/query.fcgi?cmd=Retrieve&amp;db=nucleotide&amp;list_uids=3955064&amp;dopt=GenBank">http://www.ncbi.nlm.nih.gov/entrez/query.fcgi?cmd=Retrieve&amp;db=nucleotide&amp;list_uids=3955064&amp;dopt=GenBank</a>   |
| 427 | AJ223471 | acidic phytase II                                        | Zea mays | 1161 | 1329 | 1161 |      | 2990  | <a href="http://www.ncbi.nlm.nih.gov/entrez/query.fcgi?cmd=Retrieve&amp;db=nucleotide&amp;list_uids=3955072&amp;dopt=GenBank">http://www.ncbi.nlm.nih.gov/entrez/query.fcgi?cmd=Retrieve&amp;db=nucleotide&amp;list_uids=3955072&amp;dopt=GenBank</a>   |
| 428 | AJ224847 | malic enzyme                                             | Zea mays | 501  | 501  | 501  | 170  | 5623  | <a href="http://www.ncbi.nlm.nih.gov/entrez/query.fcgi?cmd=Retrieve&amp;db=nucleotide&amp;list_uids=2950394&amp;dopt=GenBank">http://www.ncbi.nlm.nih.gov/entrez/query.fcgi?cmd=Retrieve&amp;db=nucleotide&amp;list_uids=2950394&amp;dopt=GenBank</a>   |
| 429 | AJ238785 | putative DNA mismatch repair gene, mus1                  | Zea mays | 902  | 982  | 902  |      | 10376 | <a href="http://www.ncbi.nlm.nih.gov/entrez/query.fcgi?cmd=Retrieve&amp;db=nucleotide&amp;list_uids=477557&amp;dopt=GenBank">http://www.ncbi.nlm.nih.gov/entrez/query.fcgi?cmd=Retrieve&amp;db=nucleotide&amp;list_uids=477557&amp;dopt=GenBank</a>     |
| 430 | AJ238786 | putative DNA mismatch repair gene, mus2                  | Zea mays | 284  | 284  | 284  |      | 11900 | <a href="http://www.ncbi.nlm.nih.gov/entrez/query.fcgi?cmd=Retrieve&amp;db=nucleotide&amp;list_uids=4775577&amp;dopt=GenBank">http://www.ncbi.nlm.nih.gov/entrez/query.fcgi?cmd=Retrieve&amp;db=nucleotide&amp;list_uids=4775577&amp;dopt=GenBank</a>   |
| 431 | AJ250985 | HD-ZipIV homeo domain OCL3                               | Zea mays | 493  | 493  |      |      | 3580  | <a href="http://www.ncbi.nlm.nih.gov/entrez/query.fcgi?cmd=Retrieve&amp;db=nucleotide&amp;list_uids=8920422&amp;dopt=GenBank">http://www.ncbi.nlm.nih.gov/entrez/query.fcgi?cmd=Retrieve&amp;db=nucleotide&amp;list_uids=8920422&amp;dopt=GenBank</a>   |
| 432 | AJ250986 | HD-ZipIV homeo domain OCL4                               | Zea mays | 705  | 705  |      |      | 4000  | <a href="http://www.ncbi.nlm.nih.gov/entrez/query.fcgi?cmd=Retrieve&amp;db=nucleotide&amp;list_uids=8920424&amp;dopt=GenBank">http://www.ncbi.nlm.nih.gov/entrez/query.fcgi?cmd=Retrieve&amp;db=nucleotide&amp;list_uids=8920424&amp;dopt=GenBank</a>   |
| 433 | AJ251018 | polyamine oxidase2                                       | Zea mays | 541  | 610  | 541  | 502  | 4344  | <a href="http://www.ncbi.nlm.nih.gov/entrez/query.fcgi?cmd=Retrieve&amp;db=nucleotide&amp;list_uids=9844864&amp;dopt=GenBank">http://www.ncbi.nlm.nih.gov/entrez/query.fcgi?cmd=Retrieve&amp;db=nucleotide&amp;list_uids=9844864&amp;dopt=GenBank</a>   |
| 434 | AJ251568 | polyamine oxidase1                                       | Zea mays | 488  | 557  | 488  | 449  | 4096  | <a href="http://www.ncbi.nlm.nih.gov/entrez/query.fcgi?cmd=Retrieve&amp;db=nucleotide&amp;list_uids=9843857&amp;dopt=GenBank">http://www.ncbi.nlm.nih.gov/entrez/query.fcgi?cmd=Retrieve&amp;db=nucleotide&amp;list_uids=9843857&amp;dopt=GenBank</a>   |
| 435 | AJ276022 | tapetum-specific MFS14                                   | Zea mays | 5905 | 6004 | 5905 |      | 6775  | <a href="http://www.ncbi.nlm.nih.gov/entrez/query.fcgi?cmd=Retrieve&amp;db=nucleotide&amp;list_uids=7209280&amp;dopt=GenBank">http://www.ncbi.nlm.nih.gov/entrez/query.fcgi?cmd=Retrieve&amp;db=nucleotide&amp;list_uids=7209280&amp;dopt=GenBank</a>   |
| 436 | AJ310145 | Vp1-interacting protein3                                 | Zea mays | 2610 | 2726 | 2610 |      | 6738  | <a href="http://www.ncbi.nlm.nih.gov/entrez/query.fcgi?cmd=Retrieve&amp;db=nucleotide&amp;list_uids=13446643&amp;dopt=GenBank">http://www.ncbi.nlm.nih.gov/entrez/query.fcgi?cmd=Retrieve&amp;db=nucleotide&amp;list_uids=13446643&amp;dopt=GenBank</a> |
| 437 | A32436   | 27                                                       | Zea mays | 3792 |      |      |      | 3792  | <a href="http://www.ncbi.nlm.nih.gov/entrez/query.fcgi?cmd=Retrieve&amp;db=nucleotide&amp;list_uids=1567429&amp;dopt=GenBank">http://www.ncbi.nlm.nih.gov/entrez/query.fcgi?cmd=Retrieve&amp;db=nucleotide&amp;list_uids=1567429&amp;dopt=GenBank</a>   |
| 438 | A94725   | histone H3C4, SEQ ID 3 from patent WO9934005             | Zea mays | 1565 |      |      |      | 1565  | <a href="http://www.ncbi.nlm.nih.gov/entrez/query.fcgi?cmd=Retrieve&amp;db=nucleotide&amp;list_uids=6778990&amp;dopt=GenBank">http://www.ncbi.nlm.nih.gov/entrez/query.fcgi?cmd=Retrieve&amp;db=nucleotide&amp;list_uids=6778990&amp;dopt=GenBank</a>   |
| 439 | AF072724 | starch branching enzyme 1, Sbe1                          | Zea mays | 2191 | 2218 | 2191 | 2163 | 8119  | <a href="http://www.ncbi.nlm.nih.gov/entrez/query.fcgi?cmd=Retrieve&amp;db=nucleotide&amp;list_uids=3309177&amp;dopt=GenBank">http://www.ncbi.nlm.nih.gov/entrez/query.fcgi?cmd=Retrieve&amp;db=nucleotide&amp;list_uids=3309177&amp;dopt=GenBank</a>   |
| 440 | AF072725 | starch branching enzyme IIa, amylose extender            | Zea mays | 2965 | 3065 | 2965 | 2933 | 23449 | <a href="http://www.ncbi.nlm.nih.gov/entrez/query.fcgi?cmd=Retrieve&amp;db=nucleotide&amp;list_uids=3511235&amp;dopt=GenBank">http://www.ncbi.nlm.nih.gov/entrez/query.fcgi?cmd=Retrieve&amp;db=nucleotide&amp;list_uids=3511235&amp;dopt=GenBank</a>   |
| 443 | AJ238507 | homeodomain protein hox1a                                | Zea mays | 3716 | 5802 | 3716 |      | 22927 | <a href="http://www.ncbi.nlm.nih.gov/entrez/query.fcgi?cmd=Retrieve&amp;db=nucleotide&amp;list_uids=5690094&amp;dopt=GenBank">http://www.ncbi.nlm.nih.gov/entrez/query.fcgi?cmd=Retrieve&amp;db=nucleotide&amp;list_uids=5690094&amp;dopt=GenBank</a>   |
| 447 | AR087528 | 59865174                                                 | Zea mays | 1997 |      |      |      | 1997  | <a href="http://www.ncbi.nlm.nih.gov/entrez/query.fcgi?cmd=Retrieve&amp;db=nucleotide&amp;list_uids=10014291&amp;dopt=GenBank">http://www.ncbi.nlm.nih.gov/entrez/query.fcgi?cmd=Retrieve&amp;db=nucleotide&amp;list_uids=10014291&amp;dopt=GenBank</a> |
| 448 | AR135325 | 6194636                                                  | Zea mays | 2640 |      |      |      | 2640  | <a href="http://www.ncbi.nlm.nih.gov/entrez/query.fcgi?cmd=Retrieve&amp;db=nucleotide&amp;list_uids=14124230&amp;dopt=GenBank">http://www.ncbi.nlm.nih.gov/entrez/query.fcgi?cmd=Retrieve&amp;db=nucleotide&amp;list_uids=14124230&amp;dopt=GenBank</a> |
| 449 | AR152390 | A3 promoter, SEQ ID 1 from patent US 6232526             | Zea mays | 2640 |      |      |      | 2640  | <a href="http://www.ncbi.nlm.nih.gov/entrez/query.fcgi?cmd=Retrieve&amp;db=nucleotide&amp;list_uids=15118440&amp;dopt=GenBank">http://www.ncbi.nlm.nih.gov/entrez/query.fcgi?cmd=Retrieve&amp;db=nucleotide&amp;list_uids=15118440&amp;dopt=GenBank</a> |
| 451 | AX100487 | seed preferred promoter, SEQ ID 1 from patent W00121783  | Zea mays | 1626 |      |      |      | 1626  | <a href="http://www.ncbi.nlm.nih.gov/entrez/query.fcgi?cmd=Retrieve&amp;db=nucleotide&amp;list_uids=13619501&amp;dopt=GenBank">http://www.ncbi.nlm.nih.gov/entrez/query.fcgi?cmd=Retrieve&amp;db=nucleotide&amp;list_uids=13619501&amp;dopt=GenBank</a> |
| 452 | AX151209 | patent W00140440                                         | Zea mays | 2069 |      |      |      | 2069  | <a href="http://www.ncbi.nlm.nih.gov/entrez/query.fcgi?cmd=Retrieve&amp;db=nucleotide&amp;list_uids=1453377&amp;dopt=GenBank">http://www.ncbi.nlm.nih.gov/entrez/query.fcgi?cmd=Retrieve&amp;db=nucleotide&amp;list_uids=1453377&amp;dopt=GenBank</a>   |
| 456 | AX282680 | W00168826                                                | Zea mays | 3848 |      |      |      | 3848  | <a href="http://www.ncbi.nlm.nih.gov/entrez/query.fcgi?cmd=Retrieve&amp;db=nucleotide&amp;list_uids=16609746&amp;dopt=GenBank">http://www.ncbi.nlm.nih.gov/entrez/query.fcgi?cmd=Retrieve&amp;db=nucleotide&amp;list_uids=16609746&amp;dopt=GenBank</a> |
| 457 | I24719   | pollen specific promoter, SEQ ID 1 from patent US5545546 | Zea mays | 2873 |      |      |      | 2873  | <a href="http://www.ncbi.nlm.nih.gov/entrez/query.fcgi?cmd=Retrieve&amp;db=nucleotide&amp;list_uids=1604589&amp;dopt=GenBank">http://www.ncbi.nlm.nih.gov/entrez/query.fcgi?cmd=Retrieve&amp;db=nucleotide&amp;list_uids=1604589&amp;dopt=GenBank</a>   |
| 458 | K00543   | 19-kDa zein pML1                                         | Zea mays | 1176 | 1176 |      |      | 1303  | <a href="http://www.ncbi.nlm.nih.gov/entrez/query.fcgi?cmd=Retrieve&amp;db=nucleotide&amp;list_uids=1687078&amp;dopt=GenBank">http://www.ncbi.nlm.nih.gov/entrez/query.fcgi?cmd=Retrieve&amp;db=nucleotide&amp;list_uids=1687078&amp;dopt=GenBank</a>   |
| 459 | L08425   | auxin binding protein 1 (abp1)                           | Zea mays | 921  | 1241 |      | 869  | 5574  | <a href="http://www.ncbi.nlm.nih.gov/entrez/query.fcgi?cmd=Retrieve&amp;db=nucleotide&amp;list_uids=168396&amp;dopt=GenBank">http://www.ncbi.nlm.nih.gov/entrez/query.fcgi?cmd=Retrieve&amp;db=nucleotide&amp;list_uids=168396&amp;dopt=GenBank</a>     |
| 460 | L08426   | auxin binding protein 4 (abp4)                           | Zea mays | 2022 | 2121 | 2022 | 1989 | 5574  | <a href="http://www.ncbi.nlm.nih.gov/entrez/query.fcgi?cmd=Retrieve&amp;db=nucleotide&amp;list_uids=168398&amp;dopt=GenBank">http://www.ncbi.nlm.nih.gov/entrez/query.fcgi?cmd=Retrieve&amp;db=nucleotide&amp;list_uids=168398&amp;dopt=GenBank</a>     |
| 461 | L08427   | auxin binding protein 5 (abp5)                           | Zea mays | 834  | 932  | 834  | 802  | 2718  | <a href="http://www.ncbi.nlm.nih.gov/entrez/query.fcgi?cmd=Retrieve&amp;db=nucleotide&amp;list_uids=168400&amp;dopt=GenBank">http://www.ncbi.nlm.nih.gov/entrez/query.fcgi?cmd=Retrieve&amp;db=nucleotide&amp;list_uids=168400&amp;dopt=GenBank</a>     |
| 462 | L22344   | globulin1                                                | Zea mays | 1401 |      |      | 1354 | 1401  | <a href="http://www.ncbi.nlm.nih.gov/entrez/query.fcgi?cmd=Retrieve&amp;db=nucleotide&amp;list_uids=347843&amp;dopt=GenBank">http://www.ncbi.nlm.nih.gov/entrez/query.fcgi?cmd=Retrieve&amp;db=nucleotide&amp;list_uids=347843&amp;dopt=GenBank</a>     |
| 465 | S94464   | polyubiquitin1                                           | Zea mays | 1994 | 1994 |      |      | 3841  | <a href="http://www.ncbi.nlm.nih.gov/entrez/query.fcgi?cmd=Retrieve&amp;db=nucleotide&amp;list_uids=248336&amp;dopt=GenBank">http://www.ncbi.nlm.nih.gov/entrez/query.fcgi?cmd=Retrieve&amp;db=nucleotide&amp;list_uids=248336&amp;dopt=GenBank</a>     |
| 466 | S94466   | polyubiquitin2                                           | Zea mays | 1650 | 1650 |      |      | 3439  | <a href="http://www.ncbi.nlm.nih.gov/entrez/query.fcgi?cmd=Retrieve&amp;db=nucleotide&amp;list_uids=248338&amp;dopt=GenBank">http://www.ncbi.nlm.nih.gov/entrez/query.fcgi?cmd=Retrieve&amp;db=nucleotide&amp;list_uids=248338&amp;dopt=GenBank</a>     |
| 467 | U38790   | root-preferred expressed gene zrp2                       | Zea mays | 2572 |      |      | 2544 | 2572  | <a href="http://www.ncbi.nlm.nih.gov/entrez/query.fcgi?cmd=Retrieve&amp;db=nucleotide&amp;list_uids=1063664&amp;dopt=GenBank">http://www.ncbi.nlm.nih.gov/entrez/query.fcgi?cmd=Retrieve&amp;db=nucleotide&amp;list_uids=1063664&amp;dopt=GenBank</a>   |
| 469 | X02915   | alcohol dehydrogenase2                                   | Zea mays | 288  | 414  | 288  |      | 3535  | <a href="http://www.ncbi.nlm.nih.gov/entrez/query.fcgi?cmd=Retrieve&amp;db=nucleotide&amp;list_uids=22125&amp;dopt=GenBank">http://www.ncbi.nlm.nih.gov/entrez/query.fcgi?cmd=Retrieve&amp;db=nucleotide&amp;list_uids=22125&amp;dopt=GenBank</a>       |
| 470 | X04049   | alcohol dehydrogenase1                                   | Zea mays | 1202 | 1202 |      | 1064 | 5904  | <a href="http://www.ncbi.nlm.nih.gov/entrez/query.fcgi?cmd=Retrieve&amp;db=nucleotide&amp;list_uids=22123&amp;dopt=GenBank">http://www.ncbi.nlm.nih.gov/entrez/query.fcgi?cmd=Retrieve&amp;db=nucleotide&amp;list_uids=22123&amp;dopt=GenBank</a>       |
| 471 | X05911   | 19-kDa zein                                              | Zea mays | 2389 | 2389 | 2339 | 2307 | 3391  | <a href="http://www.ncbi.nlm.nih.gov/entrez/query.fcgi?cmd=Retrieve&amp;db=nucleotide&amp;list_uids=22542&amp;dopt=GenBank">http://www.ncbi.nlm.nih.gov/entrez/query.fcgi?cmd=Retrieve&amp;db=nucleotide&amp;list_uids=22542&amp;dopt=GenBank</a>       |
| 472 | X14794   | chlorophyll a/b binding protein (cab1)                   | Zea mays | 892  | 892  |      |      | 2100  | <a href="http://www.ncbi.nlm.nih.gov/entrez/query.fcgi?cmd=Retrieve&amp;db=nucleotide&amp;list_uids=22223&amp;dopt=GenBank">http://www.ncbi.nlm.nih.gov/entrez/query.fcgi?cmd=Retrieve&amp;db=nucleotide&amp;list_uids=22223&amp;dopt=GenBank</a>       |
| 474 | X15596   | C, Gpc1                                                  | Zea mays | 2387 | 2505 | 2387 | 2341 | 5955  | <a href="http://www.ncbi.nlm.nih.gov/entrez/query.fcgi?cmd=Retrieve&amp;db=nucleotide&amp;list_uids=22302&amp;dopt=GenBank">http://www.ncbi.nlm.nih.gov/entrez/query.fcgi?cmd=Retrieve&amp;db=nucleotide&amp;list_uids=22302&amp;dopt=GenBank</a>       |

|              |                                                            |            |      |        |       |      |                                                                                                                                                                                                                                                               |                           |
|--------------|------------------------------------------------------------|------------|------|--------|-------|------|---------------------------------------------------------------------------------------------------------------------------------------------------------------------------------------------------------------------------------------------------------------|---------------------------|
| 475/AF415063 | Teosinte branched 1 (tb1)                                  | Zea mays   |      |        |       |      | <a href="http://www.ncbi.nlm.nih.gov/entrez/query.fcgi?cmd=Retrieve&amp;db=nucleotide&amp;list_uids=16305344&amp;dopt=GenBank">http://www.ncbi.nlm.nih.gov/entrez/query.fcgi?cmd=Retrieve&amp;db=nucleotide&amp;list_uids=16305344&amp;dopt=GenBank</a>       |                           |
| 476/X53514   | 27-kDa gamma zein                                          | Zea mays   | 1710 | 1710   |       |      | 2975 <a href="http://www.ncbi.nlm.nih.gov/entrez/query.fcgi?cmd=Retrieve&amp;db=nucleotide&amp;list_uids=22516&amp;dopt=GenBank">http://www.ncbi.nlm.nih.gov/entrez/query.fcgi?cmd=Retrieve&amp;db=nucleotide&amp;list_uids=22516&amp;dopt=GenBank</a>        |                           |
| 477/X53515   | 15-kDa beta-zein                                           | Zea mays   | 1241 | 1241   |       |      | 3864 <a href="http://www.ncbi.nlm.nih.gov/entrez/query.fcgi?cmd=Retrieve&amp;db=nucleotide&amp;list_uids=22514&amp;dopt=GenBank">http://www.ncbi.nlm.nih.gov/entrez/query.fcgi?cmd=Retrieve&amp;db=nucleotide&amp;list_uids=22514&amp;dopt=GenBank</a>        |                           |
| 478/X60204   | chalcone synthase, white pollen locus                      | Zea mays   | 395  | 512    | 395   | 359  | 4069 <a href="http://www.ncbi.nlm.nih.gov/entrez/query.fcgi?cmd=Retrieve&amp;db=nucleotide&amp;list_uids=22511&amp;dopt=GenBank">http://www.ncbi.nlm.nih.gov/entrez/query.fcgi?cmd=Retrieve&amp;db=nucleotide&amp;list_uids=22511&amp;dopt=GenBank</a>        |                           |
| 479/X63667   | 19-kDa zein                                                | Zea mays   | 1388 | 1450   | 1388  |      | 1452 <a href="http://www.ncbi.nlm.nih.gov/entrez/query.fcgi?cmd=Retrieve&amp;db=nucleotide&amp;list_uids=22551&amp;dopt=GenBank">http://www.ncbi.nlm.nih.gov/entrez/query.fcgi?cmd=Retrieve&amp;db=nucleotide&amp;list_uids=22551&amp;dopt=GenBank</a>        |                           |
| 481/X67619   | transcriptional regulator of anthocyanin synthesis, Snb013 | Zea mays   | 1492 |        |       | 1462 | 1492 <a href="http://www.ncbi.nlm.nih.gov/entrez/query.fcgi?cmd=Retrieve&amp;db=nucleotide&amp;list_uids=6580706&amp;dopt=GenBank">http://www.ncbi.nlm.nih.gov/entrez/query.fcgi?cmd=Retrieve&amp;db=nucleotide&amp;list_uids=6580706&amp;dopt=GenBank</a>    |                           |
| 482/X70791   | anthocyanin synthesis                                      | Zea mays   | 1953 | 2341   | 1953  | 1920 | 2662 <a href="http://www.ncbi.nlm.nih.gov/entrez/query.fcgi?cmd=Retrieve&amp;db=nucleotide&amp;list_uids=295852&amp;dopt=GenBank">http://www.ncbi.nlm.nih.gov/entrez/query.fcgi?cmd=Retrieve&amp;db=nucleotide&amp;list_uids=295852&amp;dopt=GenBank</a>      |                           |
| 483/Z29641   | U3 snRNA                                                   | Zea mays   | 1007 |        |       |      | 1007 <a href="http://www.ncbi.nlm.nih.gov/entrez/query.fcgi?cmd=Retrieve&amp;db=nucleotide&amp;list_uids=473184&amp;dopt=GenBank">http://www.ncbi.nlm.nih.gov/entrez/query.fcgi?cmd=Retrieve&amp;db=nucleotide&amp;list_uids=473184&amp;dopt=GenBank</a>      |                           |
| 484/X79065   | PCNA mRNA                                                  | Zea mays   | 102  |        | 102   |      | 1146 <a href="http://www.ncbi.nlm.nih.gov/entrez/query.fcgi?cmd=Retrieve&amp;db=nucleotide&amp;list_uids=732989&amp;dopt=GenBank">http://www.ncbi.nlm.nih.gov/entrez/query.fcgi?cmd=Retrieve&amp;db=nucleotide&amp;list_uids=732989&amp;dopt=GenBank</a>      |                           |
| 485/AF048900 | Zea mays indeterminate spikelet 1 (ids1) mRNA              | Zea mays   |      |        |       |      | <a href="http://www.ncbi.nlm.nih.gov/entrez/query.fcgi?cmd=Retrieve&amp;db=nucleotide&amp;list_uids=2944039&amp;dopt=GenBank">http://www.ncbi.nlm.nih.gov/entrez/query.fcgi?cmd=Retrieve&amp;db=nucleotide&amp;list_uids=2944039&amp;dopt=GenBank</a>         |                           |
| 486/AF434193 | X1 gene from Zea mays line LH82                            | Zea mays   | 350  | 2102   | 350   |      | 6506 <a href="http://www.ncbi.nlm.nih.gov/entrez/query.fcgi?cmd=Retrieve&amp;db=nucleotide&amp;list_uids=20502804&amp;dopt=GenBank">http://www.ncbi.nlm.nih.gov/entrez/query.fcgi?cmd=Retrieve&amp;db=nucleotide&amp;list_uids=20502804&amp;dopt=GenBank</a>  |                           |
| 487/AY095208 | glycine-rich protein expressed in silk tissue, GRP5        | Zea mays   | 1944 | 1987   | 1944  | 1912 | 3077 <a href="http://www.ncbi.nlm.nih.gov/entrez/query.fcgi?cmd=Retrieve&amp;db=nucleotide&amp;list_uids=20372713&amp;dopt=GenBank">http://www.ncbi.nlm.nih.gov/entrez/query.fcgi?cmd=Retrieve&amp;db=nucleotide&amp;list_uids=20372713&amp;dopt=GenBank</a>  |                           |
| 488/AF451895 | liguleless1                                                | Zea mays   | 3441 | 3441   | 3441  |      | 7142 <a href="http://www.ncbi.nlm.nih.gov/entrez/query.fcgi?cmd=Retrieve&amp;db=nucleotide&amp;list_uids=18092333&amp;dopt=GenBank">http://www.ncbi.nlm.nih.gov/entrez/query.fcgi?cmd=Retrieve&amp;db=nucleotide&amp;list_uids=18092333&amp;dopt=GenBank</a>  |                           |
| 489/AY061804 | defective kernel1                                          | Zea mays   | 1192 | 1246   | 1192  |      | 23975 <a href="http://www.ncbi.nlm.nih.gov/entrez/query.fcgi?cmd=Retrieve&amp;db=nucleotide&amp;list_uids=20268661&amp;dopt=GenBank">http://www.ncbi.nlm.nih.gov/entrez/query.fcgi?cmd=Retrieve&amp;db=nucleotide&amp;list_uids=20268661&amp;dopt=GenBank</a> |                           |
| 490/AJ318519 | transfer cell-specific one repeat myb protein              | Zea mays   | 771  | 809    | 771   | 724  | 2949 <a href="http://www.ncbi.nlm.nih.gov/entrez/query.fcgi?cmd=Retrieve&amp;db=nucleotide&amp;list_uids=20067662&amp;dopt=GenBank">http://www.ncbi.nlm.nih.gov/entrez/query.fcgi?cmd=Retrieve&amp;db=nucleotide&amp;list_uids=20067662&amp;dopt=GenBank</a>  |                           |
| 491/AF466932 | RP1-3 resistance gene, 26410-32388 promoter                | Zea mays   | 5978 | 32388  | 32388 |      | 8000 <a href="http://www.ncbi.nlm.nih.gov/entrez/query.fcgi?cmd=Retrieve&amp;db=nucleotide&amp;list_uids=1990884&amp;dopt=GenBank">http://www.ncbi.nlm.nih.gov/entrez/query.fcgi?cmd=Retrieve&amp;db=nucleotide&amp;list_uids=1990884&amp;dopt=GenBank</a>    |                           |
| 491/AF466932 | RP1-4 resistance gene, 73613-74624 promoter                | Zea mays   | 5000 | 32388  | 74624 |      | 5000 <a href="http://www.ncbi.nlm.nih.gov/entrez/query.fcgi?cmd=Retrieve&amp;db=nucleotide&amp;list_uids=1990884&amp;dopt=GenBank">http://www.ncbi.nlm.nih.gov/entrez/query.fcgi?cmd=Retrieve&amp;db=nucleotide&amp;list_uids=1990884&amp;dopt=GenBank</a>    |                           |
| 492/AF466931 | gene 163K15.5, promoter 15922-23707                        | Zea mays   | 7785 | 12038  | 23707 |      | 7785 <a href="http://www.ncbi.nlm.nih.gov/entrez/query.fcgi?cmd=Retrieve&amp;db=nucleotide&amp;list_uids=19073331&amp;dopt=GenBank">http://www.ncbi.nlm.nih.gov/entrez/query.fcgi?cmd=Retrieve&amp;db=nucleotide&amp;list_uids=19073331&amp;dopt=GenBank</a>  |                           |
| 492/AF466931 | gene 163K15.6, complementary promoter 34988 to 32257       | Zea mays   | 2731 | 12038  | 34988 |      | 2731 <a href="http://www.ncbi.nlm.nih.gov/entrez/query.fcgi?cmd=Retrieve&amp;db=nucleotide&amp;list_uids=19073331&amp;dopt=GenBank">http://www.ncbi.nlm.nih.gov/entrez/query.fcgi?cmd=Retrieve&amp;db=nucleotide&amp;list_uids=19073331&amp;dopt=GenBank</a>  |                           |
| 492/AF466931 | RP1 resistance gene, 2367-12038 promoter                   | Zea mays   | 9671 | 12038  | 12038 |      | 15000 <a href="http://www.ncbi.nlm.nih.gov/entrez/query.fcgi?cmd=Retrieve&amp;db=nucleotide&amp;list_uids=19073331&amp;dopt=GenBank">http://www.ncbi.nlm.nih.gov/entrez/query.fcgi?cmd=Retrieve&amp;db=nucleotide&amp;list_uids=19073331&amp;dopt=GenBank</a> |                           |
| 492/AF466931 | RP1-2 resistance gene, 82780-83794 promoter                | Zea mays   | 1014 | 12038  | 83794 |      | 5000 <a href="http://www.ncbi.nlm.nih.gov/entrez/query.fcgi?cmd=Retrieve&amp;db=nucleotide&amp;list_uids=19073331&amp;dopt=GenBank">http://www.ncbi.nlm.nih.gov/entrez/query.fcgi?cmd=Retrieve&amp;db=nucleotide&amp;list_uids=19073331&amp;dopt=GenBank</a>  |                           |
| 493/AF359511 | glutamine synthetase 1-2, pedicel-specific                 | Zea mays   | 768  | 768    | 768   | 626  | 1505 <a href="http://www.ncbi.nlm.nih.gov/entrez/query.fcgi?cmd=Retrieve&amp;db=nucleotide&amp;list_uids=1988006&amp;dopt=GenBank">http://www.ncbi.nlm.nih.gov/entrez/query.fcgi?cmd=Retrieve&amp;db=nucleotide&amp;list_uids=1988006&amp;dopt=GenBank</a>    |                           |
| 494/S57628   | metallothionein-like gene                                  | Zea mays   | 1021 | 1021   | 1021  |      | 1859 <a href="http://www.ncbi.nlm.nih.gov/entrez/query.fcgi?cmd=Retrieve&amp;db=nucleotide&amp;list_uids=236729&amp;dopt=GenBank">http://www.ncbi.nlm.nih.gov/entrez/query.fcgi?cmd=Retrieve&amp;db=nucleotide&amp;list_uids=236729&amp;dopt=GenBank</a>      |                           |
| 495/AF370006 | pyruvate decarboxylase3                                    | Zea mays   | 2205 | 2306   | 2205  |      | 7772 <a href="http://www.ncbi.nlm.nih.gov/entrez/query.fcgi?cmd=Retrieve&amp;db=nucleotide&amp;list_uids=19851523&amp;dopt=GenBank">http://www.ncbi.nlm.nih.gov/entrez/query.fcgi?cmd=Retrieve&amp;db=nucleotide&amp;list_uids=19851523&amp;dopt=GenBank</a>  |                           |
| 496/AF370004 | pyruvate decarboxylase2                                    | Zea mays   | 696  | 775    | 696   |      | 5443 <a href="http://www.ncbi.nlm.nih.gov/entrez/query.fcgi?cmd=Retrieve&amp;db=nucleotide&amp;list_uids=19851519&amp;dopt=GenBank">http://www.ncbi.nlm.nih.gov/entrez/query.fcgi?cmd=Retrieve&amp;db=nucleotide&amp;list_uids=19851519&amp;dopt=GenBank</a>  |                           |
| 497/AF348418 | aldehyde dehydrogenase r2B                                 | Zea mays   | 1205 | 1311   | 1205  |      | 4293 <a href="http://www.ncbi.nlm.nih.gov/entrez/query.fcgi?cmd=Retrieve&amp;db=nucleotide&amp;list_uids=19850252&amp;dopt=GenBank">http://www.ncbi.nlm.nih.gov/entrez/query.fcgi?cmd=Retrieve&amp;db=nucleotide&amp;list_uids=19850252&amp;dopt=GenBank</a>  |                           |
| 498/AF348414 | aldehyde dehydrogenase r2D                                 | Zea mays   | 350  | 350    | 350   |      | 2742 <a href="http://www.ncbi.nlm.nih.gov/entrez/query.fcgi?cmd=Retrieve&amp;db=nucleotide&amp;list_uids=19850244&amp;dopt=GenBank">http://www.ncbi.nlm.nih.gov/entrez/query.fcgi?cmd=Retrieve&amp;db=nucleotide&amp;list_uids=19850244&amp;dopt=GenBank</a>  |                           |
| 499/AF348412 | aldehyde dehydrogenase r2C                                 | Zea mays   | 1026 | 1085   | 1026  |      | 7258 <a href="http://www.ncbi.nlm.nih.gov/entrez/query.fcgi?cmd=Retrieve&amp;db=nucleotide&amp;list_uids=19850240&amp;dopt=GenBank">http://www.ncbi.nlm.nih.gov/entrez/query.fcgi?cmd=Retrieve&amp;db=nucleotide&amp;list_uids=19850240&amp;dopt=GenBank</a>  |                           |
| 500/X55314   | A2                                                         | Zea mays   | 1291 | 1291   |       | 1210 | 2837 <a href="http://www.ncbi.nlm.nih.gov/entrez/query.fcgi?cmd=Retrieve&amp;db=Nucleotide&amp;list_uids=22103&amp;dopt=GenBank">http://www.ncbi.nlm.nih.gov/entrez/query.fcgi?cmd=Retrieve&amp;db=Nucleotide&amp;list_uids=22103&amp;dopt=GenBank</a>        |                           |
| 501/AF466203 | B-peru, promoter 19588-22595                               | Zea mays   | 3007 | 22595  |       |      | 3007 <a href="http://www.ncbi.nlm.nih.gov/entrez/query.fcgi?cmd=Retrieve&amp;db=nucleotide&amp;list_uids=18568234&amp;dopt=GenBank">http://www.ncbi.nlm.nih.gov/entrez/query.fcgi?cmd=Retrieve&amp;db=nucleotide&amp;list_uids=18568234&amp;dopt=GenBank</a>  |                           |
| 502/AF466203 | complementary                                              | Zea mays   | 284  | 66742  |       |      | 2000 <a href="http://www.ncbi.nlm.nih.gov/entrez/query.fcgi?cmd=Retrieve&amp;db=nucleotide&amp;list_uids=18568234&amp;dopt=GenBank">http://www.ncbi.nlm.nih.gov/entrez/query.fcgi?cmd=Retrieve&amp;db=nucleotide&amp;list_uids=18568234&amp;dopt=GenBank</a>  |                           |
| 503/AF466202 | genetic modifier isr1, promoter 19704-21949                | Zea mays   | 2245 | 21949  |       |      | 2245 <a href="http://www.ncbi.nlm.nih.gov/entrez/query.fcgi?cmd=Retrieve&amp;db=nucleotide&amp;list_uids=18542165&amp;dopt=GenBank">http://www.ncbi.nlm.nih.gov/entrez/query.fcgi?cmd=Retrieve&amp;db=nucleotide&amp;list_uids=18542165&amp;dopt=GenBank</a>  |                           |
| 503/AF466202 | Lc regulatory protein, promoter 34570-38748                | Zea mays   | 4178 | 38748  |       |      | 7000 <a href="http://www.ncbi.nlm.nih.gov/entrez/query.fcgi?cmd=Retrieve&amp;db=nucleotide&amp;list_uids=18542165&amp;dopt=GenBank">http://www.ncbi.nlm.nih.gov/entrez/query.fcgi?cmd=Retrieve&amp;db=nucleotide&amp;list_uids=18542165&amp;dopt=GenBank</a>  |                           |
| 503/AF466202 | NADP-dependent malic enzyme, promoter 74329-77005          | Zea mays   | 2676 | 77005  |       |      | 6000 <a href="http://www.ncbi.nlm.nih.gov/entrez/query.fcgi?cmd=Retrieve&amp;db=nucleotide&amp;list_uids=18542165&amp;dopt=GenBank">http://www.ncbi.nlm.nih.gov/entrez/query.fcgi?cmd=Retrieve&amp;db=nucleotide&amp;list_uids=18542165&amp;dopt=GenBank</a>  |                           |
| 503/AF466202 | similar to barley aldose reductase, promoter 7486-10138    | Zea mays   | 2652 | 10138  |       |      | 5000 <a href="http://www.ncbi.nlm.nih.gov/entrez/query.fcgi?cmd=Retrieve&amp;db=nucleotide&amp;list_uids=18542165&amp;dopt=GenBank">http://www.ncbi.nlm.nih.gov/entrez/query.fcgi?cmd=Retrieve&amp;db=nucleotide&amp;list_uids=18542165&amp;dopt=GenBank</a>  |                           |
| 503/AF466202 | S-receptor kinase, promoter 16690-19030                    | Zea mays   | 2340 | 19030  |       |      | 5000 <a href="http://www.ncbi.nlm.nih.gov/entrez/query.fcgi?cmd=Retrieve&amp;db=nucleotide&amp;list_uids=18542165&amp;dopt=GenBank">http://www.ncbi.nlm.nih.gov/entrez/query.fcgi?cmd=Retrieve&amp;db=nucleotide&amp;list_uids=18542165&amp;dopt=GenBank</a>  |                           |
| 503/AF466202 | 77005-74329                                                | Zea mays   | 2676 | 74329  |       |      | 5000 <a href="http://www.ncbi.nlm.nih.gov/entrez/query.fcgi?cmd=Retrieve&amp;db=nucleotide&amp;list_uids=18542165&amp;dopt=GenBank">http://www.ncbi.nlm.nih.gov/entrez/query.fcgi?cmd=Retrieve&amp;db=nucleotide&amp;list_uids=18542165&amp;dopt=GenBank</a>  |                           |
| 505/AF465644 | lipoxigenase                                               | Zea mays   | 3801 | 4181   | 3801  | 3770 | 4264 <a href="http://www.ncbi.nlm.nih.gov/entrez/query.fcgi?cmd=Retrieve&amp;db=nucleotide&amp;list_uids=18496667&amp;dopt=GenBank">http://www.ncbi.nlm.nih.gov/entrez/query.fcgi?cmd=Retrieve&amp;db=nucleotide&amp;list_uids=18496667&amp;dopt=GenBank</a>  |                           |
| 506/AF380388 | stippled allele                                            | Zea mays   | 2835 | 2835   | 2835  |      | 9819 <a href="http://www.ncbi.nlm.nih.gov/entrez/query.fcgi?cmd=Retrieve&amp;db=nucleotide&amp;list_uids=18481438&amp;dopt=GenBank">http://www.ncbi.nlm.nih.gov/entrez/query.fcgi?cmd=Retrieve&amp;db=nucleotide&amp;list_uids=18481438&amp;dopt=GenBank</a>  |                           |
| 507/AJ428542 | histone acetyltransferase GCN5                             | Zea mays   | 300  | 300    |       | 159  | 3674 <a href="http://www.ncbi.nlm.nih.gov/entrez/query.fcgi?cmd=Retrieve&amp;db=nucleotide&amp;list_uids=18447804&amp;dopt=GenBank">http://www.ncbi.nlm.nih.gov/entrez/query.fcgi?cmd=Retrieve&amp;db=nucleotide&amp;list_uids=18447804&amp;dopt=GenBank</a>  |                           |
| 508/AJ420859 | tubulinA5                                                  | Zea mays   | 457  | 357    |       |      | 2034 <a href="http://www.ncbi.nlm.nih.gov/entrez/query.fcgi?cmd=Retrieve&amp;db=nucleotide&amp;list_uids=18157219&amp;dopt=GenBank">http://www.ncbi.nlm.nih.gov/entrez/query.fcgi?cmd=Retrieve&amp;db=nucleotide&amp;list_uids=18157219&amp;dopt=GenBank</a>  |                           |
| 509/AJ420858 | tubulinA6                                                  | Zea mays   | 350  | 2102   | 350   |      | 6506 <a href="http://www.ncbi.nlm.nih.gov/entrez/query.fcgi?cmd=Retrieve&amp;db=nucleotide&amp;list_uids=18157217&amp;dopt=GenBank">http://www.ncbi.nlm.nih.gov/entrez/query.fcgi?cmd=Retrieve&amp;db=nucleotide&amp;list_uids=18157217&amp;dopt=GenBank</a>  |                           |
| 510/AF448416 | bronze1 UDP glucosyl transferase, promoter 31637-32949     | Zea mays   | 1312 | 32949  |       |      | 1312 <a href="http://www.ncbi.nlm.nih.gov/entrez/query.fcgi?cmd=Retrieve&amp;db=nucleotide&amp;list_uids=18092333&amp;dopt=GenBank">http://www.ncbi.nlm.nih.gov/entrez/query.fcgi?cmd=Retrieve&amp;db=nucleotide&amp;list_uids=18092333&amp;dopt=GenBank</a>  |                           |
| 510/AF448416 | hypoetical protein, promoter 69583-71240                   | Zea mays   | 1657 | 71240  |       |      | 3657 <a href="http://www.ncbi.nlm.nih.gov/entrez/query.fcgi?cmd=Retrieve&amp;db=nucleotide&amp;list_uids=18092333&amp;dopt=GenBank">http://www.ncbi.nlm.nih.gov/entrez/query.fcgi?cmd=Retrieve&amp;db=nucleotide&amp;list_uids=18092333&amp;dopt=GenBank</a>  |                           |
| 510/AF448416 | ribosomal protein L35A, complementary promoter 70264-69583 | Zea mays   | 681  | 70264  |       |      | 5000 <a href="http://www.ncbi.nlm.nih.gov/entrez/query.fcgi?cmd=Retrieve&amp;db=nucleotide&amp;list_uids=18092333&amp;dopt=GenBank">http://www.ncbi.nlm.nih.gov/entrez/query.fcgi?cmd=Retrieve&amp;db=nucleotide&amp;list_uids=18092333&amp;dopt=GenBank</a>  |                           |
| 510/AF448416 | ring H2 zinc finger protein, promoter 72389-78643          | Zea mays   | 6254 | 78643  |       |      | 5000 <a href="http://www.ncbi.nlm.nih.gov/entrez/query.fcgi?cmd=Retrieve&amp;db=nucleotide&amp;list_uids=18092333&amp;dopt=GenBank">http://www.ncbi.nlm.nih.gov/entrez/query.fcgi?cmd=Retrieve&amp;db=nucleotide&amp;list_uids=18092333&amp;dopt=GenBank</a>  |                           |
| 510/AF448416 | 31637                                                      | Zea mays   | 1312 | 31637  |       |      | 5000 <a href="http://www.ncbi.nlm.nih.gov/entrez/query.fcgi?cmd=Retrieve&amp;db=nucleotide&amp;list_uids=18092333&amp;dopt=GenBank">http://www.ncbi.nlm.nih.gov/entrez/query.fcgi?cmd=Retrieve&amp;db=nucleotide&amp;list_uids=18092333&amp;dopt=GenBank</a>  |                           |
| 510/AF448416 | sesquiterpene cyclase, complementary promoter 69052-65239  | Zea mays   | 3813 | 69052  |       |      | 6000 <a href="http://www.ncbi.nlm.nih.gov/entrez/query.fcgi?cmd=Retrieve&amp;db=nucleotide&amp;list_uids=18092333&amp;dopt=GenBank">http://www.ncbi.nlm.nih.gov/entrez/query.fcgi?cmd=Retrieve&amp;db=nucleotide&amp;list_uids=18092333&amp;dopt=GenBank</a>  |                           |
| 511/AF331855 | UDP glucosyl transferase BX9                               | Zea mays   | 3002 | 3002   | 3002  |      | 6120 <a href="http://www.ncbi.nlm.nih.gov/entrez/query.fcgi?cmd=Retrieve&amp;db=nucleotide&amp;list_uids=18033229&amp;dopt=GenBank">http://www.ncbi.nlm.nih.gov/entrez/query.fcgi?cmd=Retrieve&amp;db=nucleotide&amp;list_uids=18033229&amp;dopt=GenBank</a>  |                           |
| 512/AF331854 | UDP glucosyl transferase BX8                               | Zea mays   | 3049 | 3049   | 3049  |      | 6322 <a href="http://www.ncbi.nlm.nih.gov/entrez/query.fcgi?cmd=Retrieve&amp;db=nucleotide&amp;list_uids=18033227&amp;dopt=GenBank">http://www.ncbi.nlm.nih.gov/entrez/query.fcgi?cmd=Retrieve&amp;db=nucleotide&amp;list_uids=18033227&amp;dopt=GenBank</a>  |                           |
| 513/AF314251 | dehydrin, ABA binding protein                              | Zea mays   | 629  | 629    | 629   |      | 1083 <a href="http://www.ncbi.nlm.nih.gov/entrez/query.fcgi?cmd=Retrieve&amp;db=nucleotide&amp;list_uids=18027686&amp;dopt=GenBank">http://www.ncbi.nlm.nih.gov/entrez/query.fcgi?cmd=Retrieve&amp;db=nucleotide&amp;list_uids=18027686&amp;dopt=GenBank</a>  |                           |
| 514/AF320614 | C1-1170 allele                                             | Zea mays   | 484  | 484    | 484   | 439  | 3005 <a href="http://www.ncbi.nlm.nih.gov/entrez/query.fcgi?cmd=Retrieve&amp;db=nucleotide&amp;list_uids=12958505&amp;dopt=GenBank">http://www.ncbi.nlm.nih.gov/entrez/query.fcgi?cmd=Retrieve&amp;db=nucleotide&amp;list_uids=12958505&amp;dopt=GenBank</a>  |                           |
| 515/AF374405 | long cell-linked locus gene                                | Zea mays   | 1760 | 1760   | 1760  |      | 3620 <a href="http://www.ncbi.nlm.nih.gov/entrez/query.fcgi?cmd=Retrieve&amp;db=nucleotide&amp;list_uids=16588984&amp;dopt=GenBank">http://www.ncbi.nlm.nih.gov/entrez/query.fcgi?cmd=Retrieve&amp;db=nucleotide&amp;list_uids=16588984&amp;dopt=GenBank</a>  |                           |
| 518/AF413112 | DWARF8, A619 allele                                        | Zea mays   | 930  | 1001   | 930   |      | 1363 <a href="http://www.ncbi.nlm.nih.gov/entrez/query.fcgi?cmd=Retrieve&amp;db=nucleotide&amp;list_uids=15866281&amp;dopt=GenBank">http://www.ncbi.nlm.nih.gov/entrez/query.fcgi?cmd=Retrieve&amp;db=nucleotide&amp;list_uids=15866281&amp;dopt=GenBank</a>  |                           |
| 519/AF503433 | 170F8                                                      | S. bicolor | 3726 | 141726 |       |      | 4376 <a href="http://www.ncbi.nlm.nih.gov/entrez/query.fcgi?cmd=Retrieve&amp;db=nucleotide&amp;list_uids=21326110&amp;dopt=GenBank">http://www.ncbi.nlm.nih.gov/entrez/query.fcgi?cmd=Retrieve&amp;db=nucleotide&amp;list_uids=21326110&amp;dopt=GenBank</a>  |                           |
| 520/AF369906 | actin1, 9500>14500 from BAC 10J22 Sbb3766                  | S. bicolor | 2096 | 11596  |       |      | 5000 <a href="http://www.ncbi.nlm.nih.gov/entrez/query.fcgi?cmd=Retrieve&amp;db=nucleotide&amp;list_uids=19851516&amp;dopt=GenBank">http://www.ncbi.nlm.nih.gov/entrez/query.fcgi?cmd=Retrieve&amp;db=nucleotide&amp;list_uids=19851516&amp;dopt=GenBank</a>  | rice hit is AC087192 from |
| 521/AF474131 | (AF474123), rice (Y11351)                                  | S. bicolor | 1316 | 1316   |       |      | 1899 <a href="http://www.ncbi.nlm.nih.gov/entrez/query.fcgi?cmd=Retrieve&amp;db=nucleotide&amp;list_uids=19073331&amp;dopt=GenBank">http://www.ncbi.nlm.nih.gov/entrez/query.fcgi?cmd=Retrieve&amp;db=nucleotide&amp;list_uids=19073331&amp;dopt=GenBank</a>  | Mybs, maize match         |
| 522/AF317201 | viviparous1                                                | S. bicolor | 1487 |        |       | 1488 | 1607 <a href="http://www.ncbi.nlm.nih.gov/entrez/query.fcgi?cmd=Retrieve&amp;db=nucleotide&amp;list_uids=12744472&amp;dopt=GenBank">http://www.ncbi.nlm.nih.gov/entrez/query.fcgi?cmd=Retrieve&amp;db=nucleotide&amp;list_uids=12744472&amp;dopt=GenBank</a>  | no maize genomic matches  |
| 523/AF466646 | SBTXS_0045119                                              | S. bicolor | 2070 | 19930  |       |      | 4000 <a href="http://www.ncbi.nlm.nih.gov/entrez/query.fcgi?cmd=Retrieve&amp;db=nucleotide&amp;list_uids=18568260&amp;dopt=GenBank">http://www.ncbi.nlm.nih.gov/entrez/query.fcgi?cmd=Retrieve&amp;db=nucleotide&amp;list_uids=18568260&amp;dopt=GenBank</a>  | no rice match             |

|     |          |                                                            |                   |      |        |      |      |      |       |                                                                                                                                                                                                                                                         |                       |
|-----|----------|------------------------------------------------------------|-------------------|------|--------|------|------|------|-------|---------------------------------------------------------------------------------------------------------------------------------------------------------------------------------------------------------------------------------------------------------|-----------------------|
| 524 | AF466201 | SBTXS_0032H17                                              | S. bicolor        | 2277 | 35723  |      |      |      | 7000  | <a href="http://www.ncbi.nlm.nih.gov/entrez/query.fcgi?cmd=Retrieve&amp;db=nucleotide&amp;list_uids=18483227&amp;dopt=GenBank">http://www.ncbi.nlm.nih.gov/entrez/query.fcgi?cmd=Retrieve&amp;db=nucleotide&amp;list_uids=18483227&amp;dopt=GenBank</a> |                       |
| 525 | AF466201 | SBTXS_0032H17                                              | S. bicolor        | 1940 | 65940  |      |      |      | 4000  | <a href="http://www.ncbi.nlm.nih.gov/entrez/query.fcgi?cmd=Retrieve&amp;db=nucleotide&amp;list_uids=18483227&amp;dopt=GenBank">http://www.ncbi.nlm.nih.gov/entrez/query.fcgi?cmd=Retrieve&amp;db=nucleotide&amp;list_uids=18483227&amp;dopt=GenBank</a> |                       |
| 526 | AF466200 | OCL5 protein, 15000>21000 of BAC clone SBTXS_0018C08       | S. bicolor        | 1304 | 16304  |      |      |      | 6000  | <a href="http://www.ncbi.nlm.nih.gov/entrez/query.fcgi?cmd=Retrieve&amp;db=nucleotide&amp;list_uids=18481699&amp;dopt=GenBank">http://www.ncbi.nlm.nih.gov/entrez/query.fcgi?cmd=Retrieve&amp;db=nucleotide&amp;list_uids=18481699&amp;dopt=GenBank</a> | but no promoter       |
| 527 | AF466200 | tryptophan synthase beta-subunit, 30000>25000              | S. bicolor        | 1901 | 27901  |      |      |      | 5000  | <a href="http://www.ncbi.nlm.nih.gov/entrez/query.fcgi?cmd=Retrieve&amp;db=nucleotide&amp;list_uids=18481699&amp;dopt=GenBank">http://www.ncbi.nlm.nih.gov/entrez/query.fcgi?cmd=Retrieve&amp;db=nucleotide&amp;list_uids=18481699&amp;dopt=GenBank</a> | but no promoter       |
| 528 | AF466200 | SBTXS_0018C08                                              | S. bicolor        | 1705 | 134705 |      |      |      | 4000  | <a href="http://www.ncbi.nlm.nih.gov/entrez/query.fcgi?cmd=Retrieve&amp;db=nucleotide&amp;list_uids=18481699&amp;dopt=GenBank">http://www.ncbi.nlm.nih.gov/entrez/query.fcgi?cmd=Retrieve&amp;db=nucleotide&amp;list_uids=18481699&amp;dopt=GenBank</a> | but no promoter       |
| 529 | AF466200 | SBTXS_0018C08                                              | S. bicolor        | 500  | 136995 |      |      |      | 3000  | <a href="http://www.ncbi.nlm.nih.gov/entrez/query.fcgi?cmd=Retrieve&amp;db=nucleotide&amp;list_uids=18481699&amp;dopt=GenBank">http://www.ncbi.nlm.nih.gov/entrez/query.fcgi?cmd=Retrieve&amp;db=nucleotide&amp;list_uids=18481699&amp;dopt=GenBank</a> |                       |
| 530 | AF466199 | BAC clone                                                  | S. bicolor        | 1348 | 83348  |      |      |      | 3000  | <a href="http://www.ncbi.nlm.nih.gov/entrez/query.fcgi?cmd=Retrieve&amp;db=nucleotide&amp;list_uids=18390096&amp;dopt=GenBank">http://www.ncbi.nlm.nih.gov/entrez/query.fcgi?cmd=Retrieve&amp;db=nucleotide&amp;list_uids=18390096&amp;dopt=GenBank</a> |                       |
| 531 | AF010283 | ADP-glucose pyrophosphorylase subunit shrunken2, 1>6400    | S. bicolor        | 2362 | 2362   |      |      |      | 6400  | <a href="http://www.ncbi.nlm.nih.gov/entrez/query.fcgi?cmd=Retrieve&amp;db=nucleotide&amp;list_uids=27358398&amp;dopt=GenBank">http://www.ncbi.nlm.nih.gov/entrez/query.fcgi?cmd=Retrieve&amp;db=nucleotide&amp;list_uids=27358398&amp;dopt=GenBank</a> | AF320613 = C1         |
| 532 | AF010283 | gene X transcriptional regulator, 12000>21000              | S. bicolor        | 2573 | 14573  |      |      |      | 9000  | <a href="http://www.ncbi.nlm.nih.gov/entrez/query.fcgi?cmd=Retrieve&amp;db=nucleotide&amp;list_uids=27358398&amp;dopt=GenBank">http://www.ncbi.nlm.nih.gov/entrez/query.fcgi?cmd=Retrieve&amp;db=nucleotide&amp;list_uids=27358398&amp;dopt=GenBank</a> |                       |
| 533 | AF010283 | NADPH-dependent reductase A1-a, 26350>29800                | S. bicolor        | 1999 | 28349  |      |      |      | 3451  | <a href="http://www.ncbi.nlm.nih.gov/entrez/query.fcgi?cmd=Retrieve&amp;db=nucleotide&amp;list_uids=27358398&amp;dopt=GenBank">http://www.ncbi.nlm.nih.gov/entrez/query.fcgi?cmd=Retrieve&amp;db=nucleotide&amp;list_uids=27358398&amp;dopt=GenBank</a> |                       |
| 534 | AF010283 | NADPH-dependent reductase A1-b, 37500>41100                | S. bicolor        | 2021 | 39521  |      |      |      | 3600  | <a href="http://www.ncbi.nlm.nih.gov/entrez/query.fcgi?cmd=Retrieve&amp;db=nucleotide&amp;list_uids=27358398&amp;dopt=GenBank">http://www.ncbi.nlm.nih.gov/entrez/query.fcgi?cmd=Retrieve&amp;db=nucleotide&amp;list_uids=27358398&amp;dopt=GenBank</a> |                       |
| 535 | AF114171 | beta-ketoacyl coA synthase, 1>6000 of BAC clone 25.M18     | S. bicolor        | 3841 | 3841   |      |      |      | 6000  | <a href="http://www.ncbi.nlm.nih.gov/entrez/query.fcgi?cmd=Retrieve&amp;db=nucleotide&amp;list_uids=4680196&amp;dopt=GenBank">http://www.ncbi.nlm.nih.gov/entrez/query.fcgi?cmd=Retrieve&amp;db=nucleotide&amp;list_uids=4680196&amp;dopt=GenBank</a>   | no maize genomic hits |
| 536 | AF124045 | alcohol dehydrogenase1, 9600>14000 of BAC clone            | S. bicolor        | 1257 | 10857  |      |      |      | 4400  | <a href="http://www.ncbi.nlm.nih.gov/entrez/query.fcgi?cmd=Retrieve&amp;db=nucleotide&amp;list_uids=5410347&amp;dopt=GenBank">http://www.ncbi.nlm.nih.gov/entrez/query.fcgi?cmd=Retrieve&amp;db=nucleotide&amp;list_uids=5410347&amp;dopt=GenBank</a>   |                       |
| 537 | X63756   | phosphoenolpyruvate carboxylase, C4 type                   | S. bicolor        | 626  | 626    |      | 488  |      | 7071  | <a href="http://www.ncbi.nlm.nih.gov/entrez/query.fcgi?cmd=Retrieve&amp;db=nucleotide&amp;list_uids=226110&amp;dopt=GenBank">http://www.ncbi.nlm.nih.gov/entrez/query.fcgi?cmd=Retrieve&amp;db=nucleotide&amp;list_uids=226110&amp;dopt=GenBank</a>     |                       |
| 538 | X65137   | phosphoenolpyruvate carboxylase                            | S. bicolor        | 839  | 839    |      |      |      | 7586  | <a href="http://www.ncbi.nlm.nih.gov/entrez/query.fcgi?cmd=Retrieve&amp;db=nucleotide&amp;list_uids=226144&amp;dopt=GenBank">http://www.ncbi.nlm.nih.gov/entrez/query.fcgi?cmd=Retrieve&amp;db=nucleotide&amp;list_uids=226144&amp;dopt=GenBank</a>     |                       |
| 539 | X59925   | phosphoenolpyruvate carboxylase                            | S. bicolor        | 657  | 657    |      | 489  |      | 6018  | <a href="http://www.ncbi.nlm.nih.gov/entrez/query.fcgi?cmd=Retrieve&amp;db=nucleotide&amp;list_uids=22592&amp;dopt=GenBank">http://www.ncbi.nlm.nih.gov/entrez/query.fcgi?cmd=Retrieve&amp;db=nucleotide&amp;list_uids=22592&amp;dopt=GenBank</a>       |                       |
| 540 | X56010   | hydroxy-rich glycoprotein                                  | S. bicolor        | 2518 | 2518   |      |      |      | 4231  | <a href="http://www.ncbi.nlm.nih.gov/entrez/query.fcgi?cmd=Retrieve&amp;db=nucleotide&amp;list_uids=21626&amp;dopt=GenBank">http://www.ncbi.nlm.nih.gov/entrez/query.fcgi?cmd=Retrieve&amp;db=nucleotide&amp;list_uids=21626&amp;dopt=GenBank</a>       |                       |
| 541 | AF503433 | BAC170F8                                                   | S. bicolor        | 1994 | 7994   |      |      |      | 6000  | <a href="http://www.ncbi.nlm.nih.gov/entrez/query.fcgi?cmd=Retrieve&amp;db=nucleotide&amp;list_uids=21326110&amp;dopt=GenBank">http://www.ncbi.nlm.nih.gov/entrez/query.fcgi?cmd=Retrieve&amp;db=nucleotide&amp;list_uids=21326110&amp;dopt=GenBank</a> |                       |
| 542 | X71636   | opaque2                                                    | S. bicolor        | 1406 | 1406   |      |      |      | 4315  | <a href="http://www.ncbi.nlm.nih.gov/entrez/query.fcgi?cmd=Retrieve&amp;db=nucleotide&amp;list_uids=2974818&amp;dopt=GenBank">http://www.ncbi.nlm.nih.gov/entrez/query.fcgi?cmd=Retrieve&amp;db=nucleotide&amp;list_uids=2974818&amp;dopt=GenBank</a>   |                       |
| 543 | X71667   | lipid transfer protein1 (ltp1)                             | S. bicolor        | 654  | 654    |      |      |      | 1499  | <a href="http://www.ncbi.nlm.nih.gov/entrez/query.fcgi?cmd=Retrieve&amp;db=nucleotide&amp;list_uids=311330&amp;dopt=GenBank">http://www.ncbi.nlm.nih.gov/entrez/query.fcgi?cmd=Retrieve&amp;db=nucleotide&amp;list_uids=311330&amp;dopt=GenBank</a>     | hits                  |
| 544 | X71668   | lipid transfer protein2 (ltp2)                             | S. bicolor        | 610  | 610    |      |      |      | 1800  | <a href="http://www.ncbi.nlm.nih.gov/entrez/query.fcgi?cmd=Retrieve&amp;db=nucleotide&amp;list_uids=311332&amp;dopt=GenBank">http://www.ncbi.nlm.nih.gov/entrez/query.fcgi?cmd=Retrieve&amp;db=nucleotide&amp;list_uids=311332&amp;dopt=GenBank</a>     | hits                  |
| 545 | AF503433 | from BAC170F8                                              | S. bicolor        | 1094 | 12464  |      |      |      | 5130  | <a href="http://www.ncbi.nlm.nih.gov/entrez/query.fcgi?cmd=Retrieve&amp;db=nucleotide&amp;list_uids=21326110&amp;dopt=GenBank">http://www.ncbi.nlm.nih.gov/entrez/query.fcgi?cmd=Retrieve&amp;db=nucleotide&amp;list_uids=21326110&amp;dopt=GenBank</a> |                       |
| 546 | AF503433 | BAC170F8                                                   | S. bicolor        | 875  | 17375  |      |      |      | 16500 | <a href="http://www.ncbi.nlm.nih.gov/entrez/query.fcgi?cmd=Retrieve&amp;db=nucleotide&amp;list_uids=21326110&amp;dopt=GenBank">http://www.ncbi.nlm.nih.gov/entrez/query.fcgi?cmd=Retrieve&amp;db=nucleotide&amp;list_uids=21326110&amp;dopt=GenBank</a> |                       |
| 547 | AF503433 | BAC170F8                                                   | S. bicolor        | 728  | 37058  |      |      |      | 8670  | <a href="http://www.ncbi.nlm.nih.gov/entrez/query.fcgi?cmd=Retrieve&amp;db=nucleotide&amp;list_uids=21326110&amp;dopt=GenBank">http://www.ncbi.nlm.nih.gov/entrez/query.fcgi?cmd=Retrieve&amp;db=nucleotide&amp;list_uids=21326110&amp;dopt=GenBank</a> |                       |
| 548 | AF503433 | putative 60S ribosomal protein, 66880>70500 from BAC170F8  | S. bicolor        | 2000 | 68880  |      |      |      | 3620  | <a href="http://www.ncbi.nlm.nih.gov/entrez/query.fcgi?cmd=Retrieve&amp;db=nucleotide&amp;list_uids=21326110&amp;dopt=GenBank">http://www.ncbi.nlm.nih.gov/entrez/query.fcgi?cmd=Retrieve&amp;db=nucleotide&amp;list_uids=21326110&amp;dopt=GenBank</a> |                       |
| 549 | AF503433 | putative protein kinase, 84000>80500 from BAC170F8         | S. bicolor        | 936  | 83064  |      |      |      | 3500  | <a href="http://www.ncbi.nlm.nih.gov/entrez/query.fcgi?cmd=Retrieve&amp;db=nucleotide&amp;list_uids=21326110&amp;dopt=GenBank">http://www.ncbi.nlm.nih.gov/entrez/query.fcgi?cmd=Retrieve&amp;db=nucleotide&amp;list_uids=21326110&amp;dopt=GenBank</a> |                       |
| 550 | AF503433 | putative glucosyl transferase, 108800>110400 from BAC170F8 | S. bicolor        | 1011 | 109811 |      |      |      | 1600  | <a href="http://www.ncbi.nlm.nih.gov/entrez/query.fcgi?cmd=Retrieve&amp;db=nucleotide&amp;list_uids=21326110&amp;dopt=GenBank">http://www.ncbi.nlm.nih.gov/entrez/query.fcgi?cmd=Retrieve&amp;db=nucleotide&amp;list_uids=21326110&amp;dopt=GenBank</a> |                       |
| 551 | AF503433 | putative glucosyl transferase, 110000>115000 from BAC170F8 | S. bicolor        | 1666 | 112666 |      |      |      | 4000  | <a href="http://www.ncbi.nlm.nih.gov/entrez/query.fcgi?cmd=Retrieve&amp;db=nucleotide&amp;list_uids=21326110&amp;dopt=GenBank">http://www.ncbi.nlm.nih.gov/entrez/query.fcgi?cmd=Retrieve&amp;db=nucleotide&amp;list_uids=21326110&amp;dopt=GenBank</a> |                       |
| 552 | AF503433 | putative glucosyl transferase, 117000>121000 from BAC170F8 | S. bicolor        | 2252 | 119252 |      |      |      | 4000  | <a href="http://www.ncbi.nlm.nih.gov/entrez/query.fcgi?cmd=Retrieve&amp;db=nucleotide&amp;list_uids=21326110&amp;dopt=GenBank">http://www.ncbi.nlm.nih.gov/entrez/query.fcgi?cmd=Retrieve&amp;db=nucleotide&amp;list_uids=21326110&amp;dopt=GenBank</a> |                       |
| 553 | AF503433 | putative glucosyl transferase, 121000>124000 from BAC170F8 | S. bicolor        | 1399 | 122399 |      |      |      | 3000  | <a href="http://www.ncbi.nlm.nih.gov/entrez/query.fcgi?cmd=Retrieve&amp;db=nucleotide&amp;list_uids=21326110&amp;dopt=GenBank">http://www.ncbi.nlm.nih.gov/entrez/query.fcgi?cmd=Retrieve&amp;db=nucleotide&amp;list_uids=21326110&amp;dopt=GenBank</a> |                       |
| 554 | AF503433 | putative glucosyl transferase, 124500>128500 from BAC170F8 | S. bicolor        | 2406 | 126906 |      |      |      | 4000  | <a href="http://www.ncbi.nlm.nih.gov/entrez/query.fcgi?cmd=Retrieve&amp;db=nucleotide&amp;list_uids=21326110&amp;dopt=GenBank">http://www.ncbi.nlm.nih.gov/entrez/query.fcgi?cmd=Retrieve&amp;db=nucleotide&amp;list_uids=21326110&amp;dopt=GenBank</a> |                       |
| 555 | AF503433 | putative glucosyl transferase, 128500>131000 from BAC170F8 | S. bicolor        | 945  | 129445 |      |      |      | 2500  | <a href="http://www.ncbi.nlm.nih.gov/entrez/query.fcgi?cmd=Retrieve&amp;db=nucleotide&amp;list_uids=21326110&amp;dopt=GenBank">http://www.ncbi.nlm.nih.gov/entrez/query.fcgi?cmd=Retrieve&amp;db=nucleotide&amp;list_uids=21326110&amp;dopt=GenBank</a> |                       |
| 556 | AF503433 | putative glucosyl transferase, 131000>13370 from BAC170F8  | S. bicolor        | 1149 | 132149 |      |      |      | 2700  | <a href="http://www.ncbi.nlm.nih.gov/entrez/query.fcgi?cmd=Retrieve&amp;db=nucleotide&amp;list_uids=21326110&amp;dopt=GenBank">http://www.ncbi.nlm.nih.gov/entrez/query.fcgi?cmd=Retrieve&amp;db=nucleotide&amp;list_uids=21326110&amp;dopt=GenBank</a> |                       |
| 557 | AF466199 | putative receptor protein kinase, 10500>1400 from BAC      | S. bicolor        | 2022 | 8478   |      |      |      | 9100  | <a href="http://www.ncbi.nlm.nih.gov/entrez/query.fcgi?cmd=Retrieve&amp;db=nucleotide&amp;list_uids=18390096&amp;dopt=GenBank">http://www.ncbi.nlm.nih.gov/entrez/query.fcgi?cmd=Retrieve&amp;db=nucleotide&amp;list_uids=18390096&amp;dopt=GenBank</a> | no maize genomic hits |
| 558 | AF466201 | SBTXS0032H17                                               | S. bicolor        | 1246 | 14446  |      |      |      | 3900  | <a href="http://www.ncbi.nlm.nih.gov/entrez/query.fcgi?cmd=Retrieve&amp;db=nucleotide&amp;list_uids=18483227&amp;dopt=GenBank">http://www.ncbi.nlm.nih.gov/entrez/query.fcgi?cmd=Retrieve&amp;db=nucleotide&amp;list_uids=18483227&amp;dopt=GenBank</a> |                       |
| 559 | AF466201 | BAC SBTXS0032H17                                           | S. bicolor        | 1975 | 28975  |      |      |      | 4000  | <a href="http://www.ncbi.nlm.nih.gov/entrez/query.fcgi?cmd=Retrieve&amp;db=nucleotide&amp;list_uids=18483227&amp;dopt=GenBank">http://www.ncbi.nlm.nih.gov/entrez/query.fcgi?cmd=Retrieve&amp;db=nucleotide&amp;list_uids=18483227&amp;dopt=GenBank</a> |                       |
| 560 | AF466201 | 3-glucanase, 47000>42000 from BAC SBTXS0032H17             | S. bicolor        | 1474 | 45526  |      |      |      | 5000  | <a href="http://www.ncbi.nlm.nih.gov/entrez/query.fcgi?cmd=Retrieve&amp;db=nucleotide&amp;list_uids=18483227&amp;dopt=GenBank">http://www.ncbi.nlm.nih.gov/entrez/query.fcgi?cmd=Retrieve&amp;db=nucleotide&amp;list_uids=18483227&amp;dopt=GenBank</a> |                       |
| 561 | AF466201 | SBTXS0032H17                                               | S. bicolor        | 1387 | 55613  |      |      |      | 4000  | <a href="http://www.ncbi.nlm.nih.gov/entrez/query.fcgi?cmd=Retrieve&amp;db=nucleotide&amp;list_uids=18483227&amp;dopt=GenBank">http://www.ncbi.nlm.nih.gov/entrez/query.fcgi?cmd=Retrieve&amp;db=nucleotide&amp;list_uids=18483227&amp;dopt=GenBank</a> |                       |
| 562 | AF466201 | SBTXS0032H17                                               | S. bicolor        | 1872 | 76628  |      |      |      | 6000  | <a href="http://www.ncbi.nlm.nih.gov/entrez/query.fcgi?cmd=Retrieve&amp;db=nucleotide&amp;list_uids=18483227&amp;dopt=GenBank">http://www.ncbi.nlm.nih.gov/entrez/query.fcgi?cmd=Retrieve&amp;db=nucleotide&amp;list_uids=18483227&amp;dopt=GenBank</a> |                       |
| 563 | AF466201 | BAC SBTXS0032H17                                           | S. bicolor        | 1888 | 87112  |      |      |      | 7500  | <a href="http://www.ncbi.nlm.nih.gov/entrez/query.fcgi?cmd=Retrieve&amp;db=nucleotide&amp;list_uids=18483227&amp;dopt=GenBank">http://www.ncbi.nlm.nih.gov/entrez/query.fcgi?cmd=Retrieve&amp;db=nucleotide&amp;list_uids=18483227&amp;dopt=GenBank</a> |                       |
| 564 | AF466201 | SBTXS0032H17                                               | S. bicolor        | 2010 | 90010  |      |      |      | 4500  | <a href="http://www.ncbi.nlm.nih.gov/entrez/query.fcgi?cmd=Retrieve&amp;db=nucleotide&amp;list_uids=18483227&amp;dopt=GenBank">http://www.ncbi.nlm.nih.gov/entrez/query.fcgi?cmd=Retrieve&amp;db=nucleotide&amp;list_uids=18483227&amp;dopt=GenBank</a> |                       |
| 565 | AF466199 | aminoalcoholphosphotransferase, 34000>24000 from BAC       | S. bicolor        | 2332 | 31768  |      |      |      | 10000 | <a href="http://www.ncbi.nlm.nih.gov/entrez/query.fcgi?cmd=Retrieve&amp;db=nucleotide&amp;list_uids=18390096&amp;dopt=GenBank">http://www.ncbi.nlm.nih.gov/entrez/query.fcgi?cmd=Retrieve&amp;db=nucleotide&amp;list_uids=18390096&amp;dopt=GenBank</a> |                       |
| 566 | AF466199 | putative growth regulating factor 1, 35000>39000 from BAC  | S. bicolor        | 2266 | 37266  |      |      |      | 4000  | <a href="http://www.ncbi.nlm.nih.gov/entrez/query.fcgi?cmd=Retrieve&amp;db=nucleotide&amp;list_uids=18390096&amp;dopt=GenBank">http://www.ncbi.nlm.nih.gov/entrez/query.fcgi?cmd=Retrieve&amp;db=nucleotide&amp;list_uids=18390096&amp;dopt=GenBank</a> |                       |
| 567 | AF466199 | from BAC                                                   | S. bicolor        | 1348 | 83348  |      |      |      | 2500  | <a href="http://www.ncbi.nlm.nih.gov/entrez/query.fcgi?cmd=Retrieve&amp;db=nucleotide&amp;list_uids=18390096&amp;dopt=GenBank">http://www.ncbi.nlm.nih.gov/entrez/query.fcgi?cmd=Retrieve&amp;db=nucleotide&amp;list_uids=18390096&amp;dopt=GenBank</a> |                       |
| 568 | AF466199 | gb protein, 115000>132000 from BAC                         | S. bicolor        | 2484 | 117484 |      |      |      | 17000 | <a href="http://www.ncbi.nlm.nih.gov/entrez/query.fcgi?cmd=Retrieve&amp;db=nucleotide&amp;list_uids=18390096&amp;dopt=GenBank">http://www.ncbi.nlm.nih.gov/entrez/query.fcgi?cmd=Retrieve&amp;db=nucleotide&amp;list_uids=18390096&amp;dopt=GenBank</a> |                       |
| 569 | AF466200 | SBTXS_0018C08                                              | S. bicolor        | 1839 | 63661  |      |      |      | 8000  | <a href="http://www.ncbi.nlm.nih.gov/entrez/query.fcgi?cmd=Retrieve&amp;db=nucleotide&amp;list_uids=18481699&amp;dopt=GenBank">http://www.ncbi.nlm.nih.gov/entrez/query.fcgi?cmd=Retrieve&amp;db=nucleotide&amp;list_uids=18481699&amp;dopt=GenBank</a> |                       |
| 570 | AF466200 | 65500>68500 of BAC clone SBTXS_0018C08                     | S. bicolor        | 1552 | 67052  |      |      |      | 3000  | <a href="http://www.ncbi.nlm.nih.gov/entrez/query.fcgi?cmd=Retrieve&amp;db=nucleotide&amp;list_uids=18481699&amp;dopt=GenBank">http://www.ncbi.nlm.nih.gov/entrez/query.fcgi?cmd=Retrieve&amp;db=nucleotide&amp;list_uids=18481699&amp;dopt=GenBank</a> |                       |
| 571 | AF466200 | SBTXS_0018C08                                              | S. bicolor        | 755  | 69745  |      |      |      | 1500  | <a href="http://www.ncbi.nlm.nih.gov/entrez/query.fcgi?cmd=Retrieve&amp;db=nucleotide&amp;list_uids=18481699&amp;dopt=GenBank">http://www.ncbi.nlm.nih.gov/entrez/query.fcgi?cmd=Retrieve&amp;db=nucleotide&amp;list_uids=18481699&amp;dopt=GenBank</a> |                       |
| 572 | AF466200 | BAC clone SBTXS_0018C08                                    | S. bicolor        | 1999 | 90001  |      |      |      | 7500  | <a href="http://www.ncbi.nlm.nih.gov/entrez/query.fcgi?cmd=Retrieve&amp;db=nucleotide&amp;list_uids=18481699&amp;dopt=GenBank">http://www.ncbi.nlm.nih.gov/entrez/query.fcgi?cmd=Retrieve&amp;db=nucleotide&amp;list_uids=18481699&amp;dopt=GenBank</a> |                       |
| 573 | AF466200 | SBTXS_0018C08                                              | S. bicolor        | 2151 | 96651  |      |      |      | 6000  | <a href="http://www.ncbi.nlm.nih.gov/entrez/query.fcgi?cmd=Retrieve&amp;db=nucleotide&amp;list_uids=18481699&amp;dopt=GenBank">http://www.ncbi.nlm.nih.gov/entrez/query.fcgi?cmd=Retrieve&amp;db=nucleotide&amp;list_uids=18481699&amp;dopt=GenBank</a> |                       |
| 574 | AF466200 | SBTXS_0018C08                                              | S. bicolor        | 1914 | 124914 |      |      |      | 5000  | <a href="http://www.ncbi.nlm.nih.gov/entrez/query.fcgi?cmd=Retrieve&amp;db=nucleotide&amp;list_uids=18481699&amp;dopt=GenBank">http://www.ncbi.nlm.nih.gov/entrez/query.fcgi?cmd=Retrieve&amp;db=nucleotide&amp;list_uids=18481699&amp;dopt=GenBank</a> |                       |
| 575 | AF466200 | SBTXS_0018C08                                              | S. bicolor        | 1927 | 131427 |      |      |      | 4100  | <a href="http://www.ncbi.nlm.nih.gov/entrez/query.fcgi?cmd=Retrieve&amp;db=nucleotide&amp;list_uids=18481699&amp;dopt=GenBank">http://www.ncbi.nlm.nih.gov/entrez/query.fcgi?cmd=Retrieve&amp;db=nucleotide&amp;list_uids=18481699&amp;dopt=GenBank</a> |                       |
| 576 | AF114171 | from BAC 25.M18                                            | S. bicolor        | 1630 | 150370 |      |      |      | 8000  | <a href="http://www.ncbi.nlm.nih.gov/entrez/query.fcgi?cmd=Retrieve&amp;db=nucleotide&amp;list_uids=4680196&amp;dopt=GenBank">http://www.ncbi.nlm.nih.gov/entrez/query.fcgi?cmd=Retrieve&amp;db=nucleotide&amp;list_uids=4680196&amp;dopt=GenBank</a>   |                       |
| 577 | X56004   | gsta2                                                      | Triticum aestivum | 2048 | 2048   |      |      | 1916 | 3196  | <a href="http://www.ncbi.nlm.nih.gov/entrez/query.fcgi?cmd=Retrieve&amp;db=nucleotide&amp;list_uids=21789&amp;dopt=GenBank">http://www.ncbi.nlm.nih.gov/entrez/query.fcgi?cmd=Retrieve&amp;db=nucleotide&amp;list_uids=21789&amp;dopt=GenBank</a>       |                       |
| 578 | AY050175 | waxy                                                       | Triticum aestivum | 4106 | 4106   | 3232 | 3186 |      | 4108  | <a href="http://www.ncbi.nlm.nih.gov/entrez/query.fcgi?cmd=Retrieve&amp;db=nucleotide&amp;list_uids=21628919&amp;dopt=GenBank">http://www.ncbi.nlm.nih.gov/entrez/query.fcgi?cmd=Retrieve&amp;db=nucleotide&amp;list_uids=21628919&amp;dopt=GenBank</a> |                       |
| 579 | L75824   | histone H2A                                                | Triticum aestivum |      |        |      |      |      |       | <a href="http://www.ncbi.nlm.nih.gov/entrez/query.fcgi?cmd=Retrieve&amp;db=nucleotide&amp;list_uids=17467154&amp;dopt=GenBank">http://www.ncbi.nlm.nih.gov/entrez/query.fcgi?cmd=Retrieve&amp;db=nucleotide&amp;list_uids=17467154&amp;dopt=GenBank</a> |                       |
| 580 | X03346   | HMW-glutenin                                               | Triticum aestivum | 443  | 443    | 382  | 352  |      | 3193  | <a href="http://www.ncbi.nlm.nih.gov/entrez/query.fcgi?cmd=Retrieve&amp;db=nucleotide&amp;list_uids=21784&amp;dopt=GenBank">http://www.ncbi.nlm.nih.gov/entrez/query.fcgi?cmd=Retrieve&amp;db=nucleotide&amp;list_uids=21784&amp;dopt=GenBank</a>       |                       |
| 581 | AF326781 | BAC clone AF326781                                         | Triticum aestivum | 2103 | 15603  |      |      |      | 6500  | <a href="http://www.ncbi.nlm.nih.gov/entrez/query.fcgi?cmd=Retrieve&amp;db=nucleotide&amp;list_uids=15088543&amp;dopt=GenBank">http://www.ncbi.nlm.nih.gov/entrez/query.fcgi?cmd=Retrieve&amp;db=nucleotide&amp;list_uids=15088543&amp;dopt=GenBank</a> |                       |
| 582 | AF326781 | clone AF326781                                             | Triticum aestivum | 2071 | 30929  |      |      |      | 7000  | <a href="http://www.ncbi.nlm.nih.gov/entrez/query.fcgi?cmd=Retrieve&amp;db=nucleotide&amp;list_uids=15088543&amp;dopt=GenBank">http://www.ncbi.nlm.nih.gov/entrez/query.fcgi?cmd=Retrieve&amp;db=nucleotide&amp;list_uids=15088543&amp;dopt=GenBank</a> |                       |

|     |          |                                                         |                     |       |        |       |       |       |                                                                                                                                                                                                                                                         |
|-----|----------|---------------------------------------------------------|---------------------|-------|--------|-------|-------|-------|---------------------------------------------------------------------------------------------------------------------------------------------------------------------------------------------------------------------------------------------------------|
| 583 | AF326781 | AF326781                                                | Triticum aestivum   | 1715  | 162858 |       |       | 6000  | <a href="http://www.ncbi.nlm.nih.gov/entrez/query.fcgi?cmd=Retrieve&amp;db=nucleotide&amp;list_uids=15088543&amp;dopt=GenBank">http://www.ncbi.nlm.nih.gov/entrez/query.fcgi?cmd=Retrieve&amp;db=nucleotide&amp;list_uids=15088543&amp;dopt=GenBank</a> |
| 584 | AF326781 | clone AF326781                                          | Triticum aestivum   | 2008  | 201885 |       |       | 6150  | <a href="http://www.ncbi.nlm.nih.gov/entrez/query.fcgi?cmd=Retrieve&amp;db=nucleotide&amp;list_uids=15088543&amp;dopt=GenBank">http://www.ncbi.nlm.nih.gov/entrez/query.fcgi?cmd=Retrieve&amp;db=nucleotide&amp;list_uids=15088543&amp;dopt=GenBank</a> |
| 585 | L75802   | histone H2A                                             | Triticum aestivum   | 1790  | 1790   | 1668  |       | 2546  | <a href="http://www.ncbi.nlm.nih.gov/entrez/query.fcgi?cmd=Retrieve&amp;db=nucleotide&amp;list_uids=1322276&amp;dopt=GenBank">http://www.ncbi.nlm.nih.gov/entrez/query.fcgi?cmd=Retrieve&amp;db=nucleotide&amp;list_uids=1322276&amp;dopt=GenBank</a>   |
| 586 | AF385139 | prolamin box binding factor                             | Triticum aestivum   | 2462  | 2462   |       |       | 2510  | <a href="http://www.ncbi.nlm.nih.gov/entrez/query.fcgi?cmd=Retrieve&amp;db=nucleotide&amp;list_uids=1449535&amp;dopt=GenBank">http://www.ncbi.nlm.nih.gov/entrez/query.fcgi?cmd=Retrieve&amp;db=nucleotide&amp;list_uids=1449535&amp;dopt=GenBank</a>   |
| 587 | AX047681 | thioredoxin tatrh2                                      | Triticum aestivum   | 1112  | 1112   |       |       | 2687  | <a href="http://www.ncbi.nlm.nih.gov/entrez/query.fcgi?cmd=Retrieve&amp;db=nucleotide&amp;list_uids=11876716&amp;dopt=GenBank">http://www.ncbi.nlm.nih.gov/entrez/query.fcgi?cmd=Retrieve&amp;db=nucleotide&amp;list_uids=11876716&amp;dopt=GenBank</a> |
| 588 | D30809   | transcription factor HBP-1b(c38)                        | Triticum aestivum   | 3997  | 3997   | 2428  |       | 6706  | <a href="http://www.ncbi.nlm.nih.gov/entrez/query.fcgi?cmd=Retrieve&amp;db=nucleotide&amp;list_uids=1232129&amp;dopt=GenBank">http://www.ncbi.nlm.nih.gov/entrez/query.fcgi?cmd=Retrieve&amp;db=nucleotide&amp;list_uids=1232129&amp;dopt=GenBank</a>   |
| 589 | AJ000548 | puroindoline-b                                          | Triticum aestivum   | 1068  | 1068   |       | 1006  | 1068  | <a href="http://www.ncbi.nlm.nih.gov/entrez/query.fcgi?cmd=Retrieve&amp;db=nucleotide&amp;list_uids=3980239&amp;dopt=GenBank">http://www.ncbi.nlm.nih.gov/entrez/query.fcgi?cmd=Retrieve&amp;db=nucleotide&amp;list_uids=3980239&amp;dopt=GenBank</a>   |
| 590 | X05823   | chlorophyll a/b-binding protein (Cab-1)                 | Triticum aestivum   | 915   | 915    | 844   | 816   | 929   | <a href="http://www.ncbi.nlm.nih.gov/entrez/query.fcgi?cmd=Retrieve&amp;db=nucleotide&amp;list_uids=21691&amp;dopt=GenBank">http://www.ncbi.nlm.nih.gov/entrez/query.fcgi?cmd=Retrieve&amp;db=nucleotide&amp;list_uids=21691&amp;dopt=GenBank</a>       |
| 591 | AF031235 | cold-specific protein (wsc120)                          | Triticum aestivum   | 941   | 941    | 861   | 832   | 941   | <a href="http://www.ncbi.nlm.nih.gov/entrez/query.fcgi?cmd=Retrieve&amp;db=nucleotide&amp;list_uids=2625103&amp;dopt=GenBank">http://www.ncbi.nlm.nih.gov/entrez/query.fcgi?cmd=Retrieve&amp;db=nucleotide&amp;list_uids=2625103&amp;dopt=GenBank</a>   |
| 592 | D87065   | histone H1                                              | Triticum aestivum   | 850   | 850    |       | 737   | 2541  | <a href="http://www.ncbi.nlm.nih.gov/entrez/query.fcgi?cmd=Retrieve&amp;db=nucleotide&amp;list_uids=2980892&amp;dopt=GenBank">http://www.ncbi.nlm.nih.gov/entrez/query.fcgi?cmd=Retrieve&amp;db=nucleotide&amp;list_uids=2980892&amp;dopt=GenBank</a>   |
| 593 | X66013   | cathepsin B-like gene                                   | Triticum aestivum   | 831   | 831    |       |       | 4792  | <a href="http://www.ncbi.nlm.nih.gov/entrez/query.fcgi?cmd=Retrieve&amp;db=nucleotide&amp;list_uids=21698&amp;dopt=GenBank">http://www.ncbi.nlm.nih.gov/entrez/query.fcgi?cmd=Retrieve&amp;db=nucleotide&amp;list_uids=21698&amp;dopt=GenBank</a>       |
| 594 | M16991   | alpha-amylase (a-Amy3)                                  | Triticum aestivum   | 963   | 963    | 908   | 856   | 2397  | <a href="http://www.ncbi.nlm.nih.gov/entrez/query.fcgi?cmd=Retrieve&amp;db=nucleotide&amp;list_uids=170671&amp;dopt=GenBank">http://www.ncbi.nlm.nih.gov/entrez/query.fcgi?cmd=Retrieve&amp;db=nucleotide&amp;list_uids=170671&amp;dopt=GenBank</a>     |
| 595 | X00937   | histone H3                                              | Triticum aestivum   | 248   | 248    |       | 186   | 811   | <a href="http://www.ncbi.nlm.nih.gov/entrez/query.fcgi?cmd=Retrieve&amp;db=nucleotide&amp;list_uids=21796&amp;dopt=GenBank">http://www.ncbi.nlm.nih.gov/entrez/query.fcgi?cmd=Retrieve&amp;db=nucleotide&amp;list_uids=21796&amp;dopt=GenBank</a>       |
| 596 | X07747   | low molecular weight glutenin                           | Triticum aestivum   | 551   | 551    |       | 472   | 1827  | <a href="http://www.ncbi.nlm.nih.gov/entrez/query.fcgi?cmd=Retrieve&amp;db=nucleotide&amp;list_uids=21782&amp;dopt=GenBank">http://www.ncbi.nlm.nih.gov/entrez/query.fcgi?cmd=Retrieve&amp;db=nucleotide&amp;list_uids=21782&amp;dopt=GenBank</a>       |
| 597 | X13306   | low molecular weight glutenin-ID1                       | Triticum aestivum   | 984   | 984    | 945   | 905   | 3165  | <a href="http://www.ncbi.nlm.nih.gov/entrez/query.fcgi?cmd=Retrieve&amp;db=nucleotide&amp;list_uids=21772&amp;dopt=GenBank">http://www.ncbi.nlm.nih.gov/entrez/query.fcgi?cmd=Retrieve&amp;db=nucleotide&amp;list_uids=21772&amp;dopt=GenBank</a>       |
| 598 | X02540   | alpha/beta gliadin                                      | Triticum aestivum   | 596   | 596    | 529   | 492   | 1753  | <a href="http://www.ncbi.nlm.nih.gov/entrez/query.fcgi?cmd=Retrieve&amp;db=nucleotide&amp;list_uids=21764&amp;dopt=GenBank">http://www.ncbi.nlm.nih.gov/entrez/query.fcgi?cmd=Retrieve&amp;db=nucleotide&amp;list_uids=21764&amp;dopt=GenBank</a>       |
| 599 | X53957   | chloroplast fructose-1,6-bisphosphatase                 | Triticum aestivum   | 1727  | 1727   | 1660  |       | 3600  | <a href="http://www.ncbi.nlm.nih.gov/entrez/query.fcgi?cmd=Retrieve&amp;db=nucleotide&amp;list_uids=21740&amp;dopt=GenBank">http://www.ncbi.nlm.nih.gov/entrez/query.fcgi?cmd=Retrieve&amp;db=nucleotide&amp;list_uids=21740&amp;dopt=GenBank</a>       |
| 600 | X13580   | alpha-amylase (a-Amy2)                                  | Triticum aestivum   | 587   | 587    | 491   | 458   | 847   | <a href="http://www.ncbi.nlm.nih.gov/entrez/query.fcgi?cmd=Retrieve&amp;db=nucleotide&amp;list_uids=21668&amp;dopt=GenBank">http://www.ncbi.nlm.nih.gov/entrez/query.fcgi?cmd=Retrieve&amp;db=nucleotide&amp;list_uids=21668&amp;dopt=GenBank</a>       |
| 601 | AY013753 | glutathione-S-transferase TIGST14                       | Triticum tauschii   | 2777  | 2777   | 2686  | 2651  | 3800  | <a href="http://www.ncbi.nlm.nih.gov/entrez/query.fcgi?cmd=Retrieve&amp;db=nucleotide&amp;list_uids=22038171&amp;dopt=GenBank">http://www.ncbi.nlm.nih.gov/entrez/query.fcgi?cmd=Retrieve&amp;db=nucleotide&amp;list_uids=22038171&amp;dopt=GenBank</a> |
| 602 | AY013753 | glutathione-S-transferase TIGSTU1, sequence 10000>13000 | Triticum tauschii   | 1952  | 11952  | 1860  | 11822 | 3000  | <a href="http://www.ncbi.nlm.nih.gov/entrez/query.fcgi?cmd=Retrieve&amp;db=nucleotide&amp;list_uids=22038171&amp;dopt=GenBank">http://www.ncbi.nlm.nih.gov/entrez/query.fcgi?cmd=Retrieve&amp;db=nucleotide&amp;list_uids=22038171&amp;dopt=GenBank</a> |
| 603 | AF497474 | BAC clone                                               | Triticum aestivum   | 1941  | 1959   |       |       | 3900  | <a href="http://www.ncbi.nlm.nih.gov/entrez/query.fcgi?cmd=Retrieve&amp;db=nucleotide&amp;list_uids=21779916&amp;dopt=GenBank">http://www.ncbi.nlm.nih.gov/entrez/query.fcgi?cmd=Retrieve&amp;db=nucleotide&amp;list_uids=21779916&amp;dopt=GenBank</a> |
| 604 | AF497474 | seed globulin (Glo-2), sequence 2000>4500 of BAC clone  | Triticum aestivum   | 1320  | 3320   |       |       | 2500  | <a href="http://www.ncbi.nlm.nih.gov/entrez/query.fcgi?cmd=Retrieve&amp;db=nucleotide&amp;list_uids=21779916&amp;dopt=GenBank">http://www.ncbi.nlm.nih.gov/entrez/query.fcgi?cmd=Retrieve&amp;db=nucleotide&amp;list_uids=21779916&amp;dopt=GenBank</a> |
| 605 | AF387866 | peroxidase (pxc1A)                                      | Triticum turgidum   | 684   | 684    |       |       | 2458  | <a href="http://www.ncbi.nlm.nih.gov/entrez/query.fcgi?cmd=Retrieve&amp;db=nucleotide&amp;list_uids=21717530&amp;dopt=GenBank">http://www.ncbi.nlm.nih.gov/entrez/query.fcgi?cmd=Retrieve&amp;db=nucleotide&amp;list_uids=21717530&amp;dopt=GenBank</a> |
| 606 | AJ318884 | xylanase inhibitor xip-ll                               | Triticum turgidum   | 1018  | 1018   |       |       | 2143  | <a href="http://www.ncbi.nlm.nih.gov/entrez/query.fcgi?cmd=Retrieve&amp;db=nucleotide&amp;list_uids=1869309&amp;dopt=GenBank">http://www.ncbi.nlm.nih.gov/entrez/query.fcgi?cmd=Retrieve&amp;db=nucleotide&amp;list_uids=1869309&amp;dopt=GenBank</a>   |
| 607 | AF434703 | dihydroflavonol-4-reductase                             | Triticum monococcum | 824   | 824    |       |       | 2669  | <a href="http://www.ncbi.nlm.nih.gov/entrez/query.fcgi?cmd=Retrieve&amp;db=nucleotide&amp;list_uids=1714880&amp;dopt=GenBank">http://www.ncbi.nlm.nih.gov/entrez/query.fcgi?cmd=Retrieve&amp;db=nucleotide&amp;list_uids=1714880&amp;dopt=GenBank</a>   |
| 608 | AF408845 | sucrose transporter SUT1D                               | Triticum aestivum   | 1245  | 1245   |       |       | 6582  | <a href="http://www.ncbi.nlm.nih.gov/entrez/query.fcgi?cmd=Retrieve&amp;db=nucleotide&amp;list_uids=19548164&amp;dopt=GenBank">http://www.ncbi.nlm.nih.gov/entrez/query.fcgi?cmd=Retrieve&amp;db=nucleotide&amp;list_uids=19548164&amp;dopt=GenBank</a> |
| 609 | X13927   | HMW glutenin subunit Glu-B1-1b                          | Triticum aestivum   | 16035 | 16035  | 15944 |       | 18464 | <a href="http://www.ncbi.nlm.nih.gov/entrez/query.fcgi?cmd=Retrieve&amp;db=nucleotide&amp;list_uids=18875452&amp;dopt=GenBank">http://www.ncbi.nlm.nih.gov/entrez/query.fcgi?cmd=Retrieve&amp;db=nucleotide&amp;list_uids=18875452&amp;dopt=GenBank</a> |
| 610 | M22208   | HMW glutenin subunit Ax2*                               | Triticum aestivum   | 2377  | 2377   |       |       | 4824  | <a href="http://www.ncbi.nlm.nih.gov/entrez/query.fcgi?cmd=Retrieve&amp;db=nucleotide&amp;list_uids=14043051&amp;dopt=GenBank">http://www.ncbi.nlm.nih.gov/entrez/query.fcgi?cmd=Retrieve&amp;db=nucleotide&amp;list_uids=14043051&amp;dopt=GenBank</a> |
| 611 | X13927   | phytochromeC (phyC), promoter and exons 1-4             | Triticum aestivum   | 2137  | 2137   |       |       | 6333  | <a href="http://www.ncbi.nlm.nih.gov/entrez/query.fcgi?cmd=Retrieve&amp;db=nucleotide&amp;list_uids=18875452&amp;dopt=GenBank">http://www.ncbi.nlm.nih.gov/entrez/query.fcgi?cmd=Retrieve&amp;db=nucleotide&amp;list_uids=18875452&amp;dopt=GenBank</a> |
| 612 | AF325198 | LR14, sequence 1>8251 of BAC clone                      | Triticum aestivum   | 5471  | 5471   |       |       | 8251  | <a href="http://www.ncbi.nlm.nih.gov/entrez/query.fcgi?cmd=Retrieve&amp;db=nucleotide&amp;list_uids=13377504&amp;dopt=GenBank">http://www.ncbi.nlm.nih.gov/entrez/query.fcgi?cmd=Retrieve&amp;db=nucleotide&amp;list_uids=13377504&amp;dopt=GenBank</a> |
| 613 | AF325198 | TAK14, sequence 35500>40500 of BAC clone                | Triticum aestivum   | 1897  | 36643  |       |       | 5000  | <a href="http://www.ncbi.nlm.nih.gov/entrez/query.fcgi?cmd=Retrieve&amp;db=nucleotide&amp;list_uids=13377504&amp;dopt=GenBank">http://www.ncbi.nlm.nih.gov/entrez/query.fcgi?cmd=Retrieve&amp;db=nucleotide&amp;list_uids=13377504&amp;dopt=GenBank</a> |
| 614 | AF325198 | LRK14, sequence 38000>43000 of BAC clone                | Triticum aestivum   | 1721  | 42651  |       |       | 5000  | <a href="http://www.ncbi.nlm.nih.gov/entrez/query.fcgi?cmd=Retrieve&amp;db=nucleotide&amp;list_uids=13377504&amp;dopt=GenBank">http://www.ncbi.nlm.nih.gov/entrez/query.fcgi?cmd=Retrieve&amp;db=nucleotide&amp;list_uids=13377504&amp;dopt=GenBank</a> |
| 615 | AF325197 | LRK33, sequence 12000>6500 of BAC clone                 | Triticum aestivum   | 2265  | 9735   |       |       | 5500  | <a href="http://www.ncbi.nlm.nih.gov/entrez/query.fcgi?cmd=Retrieve&amp;db=nucleotide&amp;list_uids=13377501&amp;dopt=GenBank">http://www.ncbi.nlm.nih.gov/entrez/query.fcgi?cmd=Retrieve&amp;db=nucleotide&amp;list_uids=13377501&amp;dopt=GenBank</a> |
| 616 | AF325197 | TAK33, sequence 9000>13500 of BAC clone                 | Triticum aestivum   | 1811  | 10811  |       |       | 4165  | <a href="http://www.ncbi.nlm.nih.gov/entrez/query.fcgi?cmd=Retrieve&amp;db=nucleotide&amp;list_uids=13377501&amp;dopt=GenBank">http://www.ncbi.nlm.nih.gov/entrez/query.fcgi?cmd=Retrieve&amp;db=nucleotide&amp;list_uids=13377501&amp;dopt=GenBank</a> |
| 617 | AF325196 | PS19, sequence 4500>500 of BAC clone                    | Triticum aestivum   | 2200  | 2299   |       |       | 4000  | <a href="http://www.ncbi.nlm.nih.gov/entrez/query.fcgi?cmd=Retrieve&amp;db=nucleotide&amp;list_uids=13377496&amp;dopt=GenBank">http://www.ncbi.nlm.nih.gov/entrez/query.fcgi?cmd=Retrieve&amp;db=nucleotide&amp;list_uids=13377496&amp;dopt=GenBank</a> |
| 618 | AF325196 | LRR19, sequence 3000>7300 of BAC clone                  | Triticum aestivum   | 1028  | 4028   |       |       | 4300  | <a href="http://www.ncbi.nlm.nih.gov/entrez/query.fcgi?cmd=Retrieve&amp;db=nucleotide&amp;list_uids=13377496&amp;dopt=GenBank">http://www.ncbi.nlm.nih.gov/entrez/query.fcgi?cmd=Retrieve&amp;db=nucleotide&amp;list_uids=13377496&amp;dopt=GenBank</a> |
| 619 | AF325196 | TAK19-1, sequence 30000>25000 of BAC clone              | Triticum aestivum   | 2121  | 27879  |       |       | 5000  | <a href="http://www.ncbi.nlm.nih.gov/entrez/query.fcgi?cmd=Retrieve&amp;db=nucleotide&amp;list_uids=13377496&amp;dopt=GenBank">http://www.ncbi.nlm.nih.gov/entrez/query.fcgi?cmd=Retrieve&amp;db=nucleotide&amp;list_uids=13377496&amp;dopt=GenBank</a> |
| 620 | AF325196 | LRK19, sequence 26500>31500 of BAC clone                | Triticum aestivum   | 1916  | 28416  |       |       | 5000  | <a href="http://www.ncbi.nlm.nih.gov/entrez/query.fcgi?cmd=Retrieve&amp;db=nucleotide&amp;list_uids=13377496&amp;dopt=GenBank">http://www.ncbi.nlm.nih.gov/entrez/query.fcgi?cmd=Retrieve&amp;db=nucleotide&amp;list_uids=13377496&amp;dopt=GenBank</a> |
| 621 | AF177218 | grain softness protein1 (Gsp1)                          | Triticum aestivum   | 925   | 925    |       |       | 2122  | <a href="http://www.ncbi.nlm.nih.gov/entrez/query.fcgi?cmd=Retrieve&amp;db=nucleotide&amp;list_uids=9957229&amp;dopt=GenBank">http://www.ncbi.nlm.nih.gov/entrez/query.fcgi?cmd=Retrieve&amp;db=nucleotide&amp;list_uids=9957229&amp;dopt=GenBank</a>   |
| 622 | AF234649 | gamma-gliadin                                           | Triticum aestivum   | 4160  | 4160   |       |       | 6443  | <a href="http://www.ncbi.nlm.nih.gov/entrez/query.fcgi?cmd=Retrieve&amp;db=nucleotide&amp;list_uids=15148395&amp;dopt=GenBank">http://www.ncbi.nlm.nih.gov/entrez/query.fcgi?cmd=Retrieve&amp;db=nucleotide&amp;list_uids=15148395&amp;dopt=GenBank</a> |
| 623 | AF156977 | 1,4-beta-xylan endohydrolase, Wx1                       | Triticum aestivum   | 1780  | 1780   |       |       | 3967  | <a href="http://www.ncbi.nlm.nih.gov/entrez/query.fcgi?cmd=Retrieve&amp;db=nucleotide&amp;list_uids=15011835&amp;dopt=GenBank">http://www.ncbi.nlm.nih.gov/entrez/query.fcgi?cmd=Retrieve&amp;db=nucleotide&amp;list_uids=15011835&amp;dopt=GenBank</a> |
| 624 | AB038391 | cysteine proteinase inhibitor gWc2, partial cds         | Triticum aestivum   | 424   | 424    |       |       | 1254  | <a href="http://www.ncbi.nlm.nih.gov/entrez/query.fcgi?cmd=Retrieve&amp;db=nucleotide&amp;list_uids=11559276&amp;dopt=GenBank">http://www.ncbi.nlm.nih.gov/entrez/query.fcgi?cmd=Retrieve&amp;db=nucleotide&amp;list_uids=11559276&amp;dopt=GenBank</a> |
| 625 | AF021243 | translation initiation factor 4B (eIF4B)                | Triticum aestivum   | 799   | 799    |       |       | 4795  | <a href="http://www.ncbi.nlm.nih.gov/entrez/query.fcgi?cmd=Retrieve&amp;db=nucleotide&amp;list_uids=3372235&amp;dopt=GenBank">http://www.ncbi.nlm.nih.gov/entrez/query.fcgi?cmd=Retrieve&amp;db=nucleotide&amp;list_uids=3372235&amp;dopt=GenBank</a>   |
| 626 | AJ302091 | puroindoline-a                                          | Triticum aestivum   | 876   | 876    |       |       | 1336  | <a href="http://www.ncbi.nlm.nih.gov/entrez/query.fcgi?cmd=Retrieve&amp;db=nucleotide&amp;list_uids=13235616&amp;dopt=GenBank">http://www.ncbi.nlm.nih.gov/entrez/query.fcgi?cmd=Retrieve&amp;db=nucleotide&amp;list_uids=13235616&amp;dopt=GenBank</a> |
| 627 | AB042069 | rubisco small subunit (rbcS)                            | Triticum aestivum   | 626   | 626    | 549   |       | 1500  | <a href="http://www.ncbi.nlm.nih.gov/entrez/query.fcgi?cmd=Retrieve&amp;db=nucleotide&amp;list_uids=11990902&amp;dopt=GenBank">http://www.ncbi.nlm.nih.gov/entrez/query.fcgi?cmd=Retrieve&amp;db=nucleotide&amp;list_uids=11990902&amp;dopt=GenBank</a> |
| 628 | AB030708 | nuclear matrix binding protein AHM1                     | Triticum aestivum   | 1358  | 1358   | 1268  |       | 3846  | <a href="http://www.ncbi.nlm.nih.gov/entrez/query.fcgi?cmd=Retrieve&amp;db=nucleotide&amp;list_uids=6691466&amp;dopt=GenBank">http://www.ncbi.nlm.nih.gov/entrez/query.fcgi?cmd=Retrieve&amp;db=nucleotide&amp;list_uids=6691466&amp;dopt=GenBank</a>   |
| 629 | AF280605 | omega gliadin storage protein                           | Triticum aestivum   | 2464  | 2464   | 2359  |       | 3789  | <a href="http://www.ncbi.nlm.nih.gov/entrez/query.fcgi?cmd=Retrieve&amp;db=nucleotide&amp;list_uids=10444083&amp;dopt=GenBank">http://www.ncbi.nlm.nih.gov/entrez/query.fcgi?cmd=Retrieve&amp;db=nucleotide&amp;list_uids=10444083&amp;dopt=GenBank</a> |
| 630 | AJ237897 | starch branching enzyme1 (Sbe1)                         | Triticum aestivum   | 2037  | 2037   | 2015  | 1972  | 8020  | <a href="http://www.ncbi.nlm.nih.gov/entrez/query.fcgi?cmd=Retrieve&amp;db=nucleotide&amp;list_uids=4586235&amp;dopt=GenBank">http://www.ncbi.nlm.nih.gov/entrez/query.fcgi?cmd=Retrieve&amp;db=nucleotide&amp;list_uids=4586235&amp;dopt=GenBank</a>   |
| 631 | X73228   | Em H5                                                   | Triticum aestivum   | 799   | 799    |       | 670   | 1480  | <a href="http://www.ncbi.nlm.nih.gov/entrez/query.fcgi?cmd=Retrieve&amp;db=nucleotide&amp;list_uids=312520&amp;dopt=GenBank">http://www.ncbi.nlm.nih.gov/entrez/query.fcgi?cmd=Retrieve&amp;db=nucleotide&amp;list_uids=312520&amp;dopt=GenBank</a>     |
| 632 | X73227   | Em H2                                                   | Triticum aestivum   | 653   | 653    |       | 527   | 1665  | <a href="http://www.ncbi.nlm.nih.gov/entrez/query.fcgi?cmd=Retrieve&amp;db=nucleotide&amp;list_uids=312518&amp;dopt=GenBank">http://www.ncbi.nlm.nih.gov/entrez/query.fcgi?cmd=Retrieve&amp;db=nucleotide&amp;list_uids=312518&amp;dopt=GenBank</a>     |
| 633 | AF091802 | starch synthaseI                                        | Triticum tauschii   | 1001  | 1001   | 746   |       | 11387 | <a href="http://www.ncbi.nlm.nih.gov/entrez/query.fcgi?cmd=Retrieve&amp;db=nucleotide&amp;list_uids=6103326&amp;dopt=GenBank">http://www.ncbi.nlm.nih.gov/entrez/query.fcgi?cmd=Retrieve&amp;db=nucleotide&amp;list_uids=6103326&amp;dopt=GenBank</a>   |
| 634 | AH005224 | serine-threonine protein kinase TaPK3                   | Triticum aestivum   | 612   | 612    |       |       | 2626  | <a href="http://www.ncbi.nlm.nih.gov/entrez/query.fcgi?cmd=Retrieve&amp;db=nucleotide&amp;list_uids=2055373&amp;dopt=GenBank">http://www.ncbi.nlm.nih.gov/entrez/query.fcgi?cmd=Retrieve&amp;db=nucleotide&amp;list_uids=2055373&amp;dopt=GenBank</a>   |
| 635 | AJ238245 | high-affinity sulfate transporter st2                   | Triticum tauschii   | 1092  | 1092   |       | 824   | 5329  | <a href="http://www.ncbi.nlm.nih.gov/entrez/query.fcgi?cmd=Retrieve&amp;db=nucleotide&amp;list_uids=4850272&amp;dopt=GenBank">http://www.ncbi.nlm.nih.gov/entrez/query.fcgi?cmd=Retrieve&amp;db=nucleotide&amp;list_uids=4850272&amp;dopt=GenBank</a>   |
| 636 | AJ238244 | high-affinity sulfate transporter st1                   | Triticum tauschii   | 2482  | 2482   |       | 1928  | 6601  | <a href="http://www.ncbi.nlm.nih.gov/entrez/query.fcgi?cmd=Retrieve&amp;db=nucleotide&amp;list_uids=4850270&amp;dopt=GenBank">http://www.ncbi.nlm.nih.gov/entrez/query.fcgi?cmd=Retrieve&amp;db=nucleotide&amp;list_uids=4850270&amp;dopt=GenBank</a>   |
| 637 | S63737   | sedoheptulose-1,7-bisphosphatase                        | Triticum aestivum   | 474   | 474    |       |       | 493   | <a href="http://www.ncbi.nlm.nih.gov/entrez/query.fcgi?cmd=Retrieve&amp;db=nucleotide&amp;list_uids=38666&amp;dopt=GenBank">http://www.ncbi.nlm.nih.gov/entrez/query.fcgi?cmd=Retrieve&amp;db=nucleotide&amp;list_uids=38666&amp;dopt=GenBank</a>       |
| 638 | U51330   | leaf rust resistance kinase Lr10 (LRK10)                | Triticum aestivum   | 619   | 619    |       |       | 3878  | <a href="http://www.ncbi.nlm.nih.gov/entrez/query.fcgi?cmd=Retrieve&amp;db=nucleotide&amp;list_uids=1680685&amp;dopt=GenBank">http://www.ncbi.nlm.nih.gov/entrez/query.fcgi?cmd=Retrieve&amp;db=nucleotide&amp;list_uids=1680685&amp;dopt=GenBank</a>   |
| 639 | AJ007705 | phosphoenolpyruvate carboxylase (PEPC)                  | Triticum aestivum   | 396   | 396    |       | 236   | 5845  | <a href="http://www.ncbi.nlm.nih.gov/entrez/query.fcgi?cmd=Retrieve&amp;db=nucleotide&amp;list_uids=3341489&amp;dopt=GenBank">http://www.ncbi.nlm.nih.gov/entrez/query.fcgi?cmd=Retrieve&amp;db=nucleotide&amp;list_uids=3341489&amp;dopt=GenBank</a>   |
| 640 | X73528   | phosphoglycerate kinase                                 | Triticum aestivum   | 1061  | 1061   | 1046  |       | 3557  | <a href="http://www.ncbi.nlm.nih.gov/entrez/query.fcgi?cmd=Retrieve&amp;db=nucleotide&amp;list_uids=313266&amp;dopt=GenBank">http://www.ncbi.nlm.nih.gov/entrez/query.fcgi?cmd=Retrieve&amp;db=nucleotide&amp;list_uids=313266&amp;dopt=GenBank</a>     |
| 641 | D16415   | WZF1 zinc finger protein                                | Triticum aestivum   | 1238  | 1238   | 1109  | 1069  | 2862  | <a href="http://www.ncbi.nlm.nih.gov/entrez/query.fcgi?cmd=Retrieve&amp;db=nucleotide&amp;list_uids=441220&amp;dopt=GenBank">http://www.ncbi.nlm.nih.gov/entrez/query.fcgi?cmd=Retrieve&amp;db=nucleotide&amp;list_uids=441220&amp;dopt=GenBank</a>     |

|     |          |                                                      |                   |      |      |      |      |       |                                                                                                                                                                                                                                                       |
|-----|----------|------------------------------------------------------|-------------------|------|------|------|------|-------|-------------------------------------------------------------------------------------------------------------------------------------------------------------------------------------------------------------------------------------------------------|
| 642 | D13795   | tritin ribosome inactivating protein                 | Triticum aestivum | 1298 | 1298 |      |      | 3209  | <a href="http://www.ncbi.nlm.nih.gov/entrez/query.fcgi?cmd=Retrieve&amp;db=nucleotide&amp;list_uids=391928&amp;dopt=GenBank">http://www.ncbi.nlm.nih.gov/entrez/query.fcgi?cmd=Retrieve&amp;db=nucleotide&amp;list_uids=391928&amp;dopt=GenBank</a>   |
| 643 | X9705    | phenylalanine ammonia lyase                          | Triticum aestivum | 886  | 886  | 768  | 640  | 3444  | <a href="http://www.ncbi.nlm.nih.gov/entrez/query.fcgi?cmd=Retrieve&amp;db=nucleotide&amp;list_uids=1483609&amp;dopt=GenBank">http://www.ncbi.nlm.nih.gov/entrez/query.fcgi?cmd=Retrieve&amp;db=nucleotide&amp;list_uids=1483609&amp;dopt=GenBank</a> |
| 644 | U42336   | ACC synthase (TA-ACS2)                               | Triticum aestivum | 796  | 796  | 590  |      | 5590  | <a href="http://www.ncbi.nlm.nih.gov/entrez/query.fcgi?cmd=Retrieve&amp;db=nucleotide&amp;list_uids=1244715&amp;dopt=GenBank">http://www.ncbi.nlm.nih.gov/entrez/query.fcgi?cmd=Retrieve&amp;db=nucleotide&amp;list_uids=1244715&amp;dopt=GenBank</a> |
| 645 | X76041   | endochitinase                                        | Triticum aestivum | 633  | 633  | 600  | 529  | 1985  | <a href="http://www.ncbi.nlm.nih.gov/entrez/query.fcgi?cmd=Retrieve&amp;db=nucleotide&amp;list_uids=416028&amp;dopt=GenBank">http://www.ncbi.nlm.nih.gov/entrez/query.fcgi?cmd=Retrieve&amp;db=nucleotide&amp;list_uids=416028&amp;dopt=GenBank</a>   |
| 646 | X56012   | glutathione-S-transferase A1 (gstA1)                 | Triticum aestivum |      |      |      |      |       | <a href="http://www.ncbi.nlm.nih.gov/entrez/query.fcgi?cmd=Retrieve&amp;db=nucleotide&amp;list_uids=21787&amp;dopt=GenBank">http://www.ncbi.nlm.nih.gov/entrez/query.fcgi?cmd=Retrieve&amp;db=nucleotide&amp;list_uids=21787&amp;dopt=GenBank</a>     |
| 647 | X00043   | histone H4                                           | Triticum aestivum | 736  | 736  | 669  |      | 1200  | <a href="http://www.ncbi.nlm.nih.gov/entrez/query.fcgi?cmd=Retrieve&amp;db=nucleotide&amp;list_uids=21794&amp;dopt=GenBank">http://www.ncbi.nlm.nih.gov/entrez/query.fcgi?cmd=Retrieve&amp;db=nucleotide&amp;list_uids=21794&amp;dopt=GenBank</a>     |
| 648 | X52103   | Em                                                   | Triticum aestivum | 1329 | 1329 |      | 1194 | 2465  | <a href="http://www.ncbi.nlm.nih.gov/entrez/query.fcgi?cmd=Retrieve&amp;db=nucleotide&amp;list_uids=21729&amp;dopt=GenBank">http://www.ncbi.nlm.nih.gov/entrez/query.fcgi?cmd=Retrieve&amp;db=nucleotide&amp;list_uids=21729&amp;dopt=GenBank</a>     |
| 649 | X68288   | EC metallothionein protein                           | Triticum aestivum | 2207 | 2207 | 2131 | 2101 | 3065  | <a href="http://www.ncbi.nlm.nih.gov/entrez/query.fcgi?cmd=Retrieve&amp;db=nucleotide&amp;list_uids=21727&amp;dopt=GenBank">http://www.ncbi.nlm.nih.gov/entrez/query.fcgi?cmd=Retrieve&amp;db=nucleotide&amp;list_uids=21727&amp;dopt=GenBank</a>     |
| 650 | X81370   | AWJL236                                              | Triticum aestivum | 557  | 557  |      | 433  | 1910  | <a href="http://www.ncbi.nlm.nih.gov/entrez/query.fcgi?cmd=Retrieve&amp;db=nucleotide&amp;list_uids=551213&amp;dopt=GenBank">http://www.ncbi.nlm.nih.gov/entrez/query.fcgi?cmd=Retrieve&amp;db=nucleotide&amp;list_uids=551213&amp;dopt=GenBank</a>   |
| 651 | X81369   | AWJL218                                              | Triticum aestivum | 625  | 625  |      | 554  | 2329  | <a href="http://www.ncbi.nlm.nih.gov/entrez/query.fcgi?cmd=Retrieve&amp;db=nucleotide&amp;list_uids=551211&amp;dopt=GenBank">http://www.ncbi.nlm.nih.gov/entrez/query.fcgi?cmd=Retrieve&amp;db=nucleotide&amp;list_uids=551211&amp;dopt=GenBank</a>   |
| 652 | X81368   | AWJL175                                              | Triticum aestivum | 788  | 788  |      | 650  | 2374  | <a href="http://www.ncbi.nlm.nih.gov/entrez/query.fcgi?cmd=Retrieve&amp;db=nucleotide&amp;list_uids=551209&amp;dopt=GenBank">http://www.ncbi.nlm.nih.gov/entrez/query.fcgi?cmd=Retrieve&amp;db=nucleotide&amp;list_uids=551209&amp;dopt=GenBank</a>   |
| 653 | X13576   | alpha amylase Amy2/8                                 | Triticum aestivum | 683  | 683  | 590  | 557  | 940   | <a href="http://www.ncbi.nlm.nih.gov/entrez/query.fcgi?cmd=Retrieve&amp;db=nucleotide&amp;list_uids=21670&amp;dopt=GenBank">http://www.ncbi.nlm.nih.gov/entrez/query.fcgi?cmd=Retrieve&amp;db=nucleotide&amp;list_uids=21670&amp;dopt=GenBank</a>     |
| 654 | X13580   | alpha amylase Amy2/54                                | Triticum aestivum | 587  | 587  | 491  | 458  | 847   | <a href="http://www.ncbi.nlm.nih.gov/entrez/query.fcgi?cmd=Retrieve&amp;db=nucleotide&amp;list_uids=21668&amp;dopt=GenBank">http://www.ncbi.nlm.nih.gov/entrez/query.fcgi?cmd=Retrieve&amp;db=nucleotide&amp;list_uids=21668&amp;dopt=GenBank</a>     |
| 655 | X13577   | alpha amylase Amy2/53                                | Triticum aestivum | 667  | 667  | 586  | 553  | 919   | <a href="http://www.ncbi.nlm.nih.gov/entrez/query.fcgi?cmd=Retrieve&amp;db=nucleotide&amp;list_uids=21666&amp;dopt=GenBank">http://www.ncbi.nlm.nih.gov/entrez/query.fcgi?cmd=Retrieve&amp;db=nucleotide&amp;list_uids=21666&amp;dopt=GenBank</a>     |
| 656 | X13579   | alpha amylase Amy2/46                                | Triticum aestivum | 561  | 561  | 456  | 423  | 787   | <a href="http://www.ncbi.nlm.nih.gov/entrez/query.fcgi?cmd=Retrieve&amp;db=nucleotide&amp;list_uids=21664&amp;dopt=GenBank">http://www.ncbi.nlm.nih.gov/entrez/query.fcgi?cmd=Retrieve&amp;db=nucleotide&amp;list_uids=21664&amp;dopt=GenBank</a>     |
| 657 | X13578   | alpha amylase Amy2/34                                | Triticum aestivum | 652  | 652  | 597  | 564  | 934   | <a href="http://www.ncbi.nlm.nih.gov/entrez/query.fcgi?cmd=Retrieve&amp;db=nucleotide&amp;list_uids=21662&amp;dopt=GenBank">http://www.ncbi.nlm.nih.gov/entrez/query.fcgi?cmd=Retrieve&amp;db=nucleotide&amp;list_uids=21662&amp;dopt=GenBank</a>     |
| 658 | M37328   | rubisco small subunit (rbcS), exons 1 and 2          | Triticum aestivum | 696  | 696  |      |      | 2205  | <a href="http://www.ncbi.nlm.nih.gov/entrez/query.fcgi?cmd=Retrieve&amp;db=nucleotide&amp;list_uids=170768&amp;dopt=GenBank">http://www.ncbi.nlm.nih.gov/entrez/query.fcgi?cmd=Retrieve&amp;db=nucleotide&amp;list_uids=170768&amp;dopt=GenBank</a>   |
| 659 | J02817   | gibberellin-responsive carboxypeptidase              | Triticum aestivum | 1052 | 1052 | 1009 |      | 5315  | <a href="http://www.ncbi.nlm.nih.gov/entrez/query.fcgi?cmd=Retrieve&amp;db=nucleotide&amp;list_uids=170703&amp;dopt=GenBank">http://www.ncbi.nlm.nih.gov/entrez/query.fcgi?cmd=Retrieve&amp;db=nucleotide&amp;list_uids=170703&amp;dopt=GenBank</a>   |
| 660 | M63224   | germin 9F-3.8                                        | Triticum aestivum | 1318 | 1318 | 1217 |      | 3761  | <a href="http://www.ncbi.nlm.nih.gov/entrez/query.fcgi?cmd=Retrieve&amp;db=nucleotide&amp;list_uids=170699&amp;dopt=GenBank">http://www.ncbi.nlm.nih.gov/entrez/query.fcgi?cmd=Retrieve&amp;db=nucleotide&amp;list_uids=170699&amp;dopt=GenBank</a>   |
| 661 | M63223   | germin 9F-2.8                                        | Triticum aestivum | 1799 | 1799 | 1695 |      | 2822  | <a href="http://www.ncbi.nlm.nih.gov/entrez/query.fcgi?cmd=Retrieve&amp;db=nucleotide&amp;list_uids=170697&amp;dopt=GenBank">http://www.ncbi.nlm.nih.gov/entrez/query.fcgi?cmd=Retrieve&amp;db=nucleotide&amp;list_uids=170697&amp;dopt=GenBank</a>   |
| 662 | M81719   | Gib1                                                 | Triticum aestivum | 1434 | 1434 | 1389 | 1365 | 4747  | <a href="http://www.ncbi.nlm.nih.gov/entrez/query.fcgi?cmd=Retrieve&amp;db=nucleotide&amp;list_uids=170695&amp;dopt=GenBank">http://www.ncbi.nlm.nih.gov/entrez/query.fcgi?cmd=Retrieve&amp;db=nucleotide&amp;list_uids=170695&amp;dopt=GenBank</a>   |
| 663 | AF000940 | ribonuclease                                         | Hordeum vulgare   | 293  |      | 293  |      | 1583  | <a href="http://www.ncbi.nlm.nih.gov/entrez/query.fcgi?cmd=Retrieve&amp;db=nucleotide&amp;list_uids=2150001&amp;dopt=GenBank">http://www.ncbi.nlm.nih.gov/entrez/query.fcgi?cmd=Retrieve&amp;db=nucleotide&amp;list_uids=2150001&amp;dopt=GenBank</a> |
| 664 | AF020791 | ferrochelatase (hemH)                                | Hordeum vulgare   | 1606 |      | 1606 | 1531 | 7694  | <a href="http://www.ncbi.nlm.nih.gov/entrez/query.fcgi?cmd=Retrieve&amp;db=nucleotide&amp;list_uids=2460250&amp;dopt=GenBank">http://www.ncbi.nlm.nih.gov/entrez/query.fcgi?cmd=Retrieve&amp;db=nucleotide&amp;list_uids=2460250&amp;dopt=GenBank</a> |
| 665 | AF021256 | 32 kDa protein (JRG1.1)                              | Hordeum vulgare   | 2125 | 2200 | 2125 | 2093 | 3786  | <a href="http://www.ncbi.nlm.nih.gov/entrez/query.fcgi?cmd=Retrieve&amp;db=nucleotide&amp;list_uids=2465425&amp;dopt=GenBank">http://www.ncbi.nlm.nih.gov/entrez/query.fcgi?cmd=Retrieve&amp;db=nucleotide&amp;list_uids=2465425&amp;dopt=GenBank</a> |
| 666 | AF021257 | 32 kDa protein (JRG1.2)                              | Hordeum vulgare   | 2783 | 2839 | 2783 | 2752 | 4487  | <a href="http://www.ncbi.nlm.nih.gov/entrez/query.fcgi?cmd=Retrieve&amp;db=nucleotide&amp;list_uids=2465427&amp;dopt=GenBank">http://www.ncbi.nlm.nih.gov/entrez/query.fcgi?cmd=Retrieve&amp;db=nucleotide&amp;list_uids=2465427&amp;dopt=GenBank</a> |
| 667 | AF021258 | 32 kDa protein (JRG1.3)                              | Hordeum vulgare   | 251  | 326  | 251  | 220  | 1792  | <a href="http://www.ncbi.nlm.nih.gov/entrez/query.fcgi?cmd=Retrieve&amp;db=nucleotide&amp;list_uids=2465429&amp;dopt=GenBank">http://www.ncbi.nlm.nih.gov/entrez/query.fcgi?cmd=Retrieve&amp;db=nucleotide&amp;list_uids=2465429&amp;dopt=GenBank</a> |
| 668 | AF022725 | limit dextrinase (HvLD99)                            | Hordeum vulgare   | 1950 | 1950 |      | 1950 | 12034 | <a href="http://www.ncbi.nlm.nih.gov/entrez/query.fcgi?cmd=Retrieve&amp;db=nucleotide&amp;list_uids=2520057&amp;dopt=GenBank">http://www.ncbi.nlm.nih.gov/entrez/query.fcgi?cmd=Retrieve&amp;db=nucleotide&amp;list_uids=2520057&amp;dopt=GenBank</a> |
| 669 | AF043086 | dehydrin 11 (dhn11)                                  | Hordeum vulgare   | 810  | 844  | 810  |      | 2420  | <a href="http://www.ncbi.nlm.nih.gov/entrez/query.fcgi?cmd=Retrieve&amp;db=nucleotide&amp;list_uids=4105100&amp;dopt=GenBank">http://www.ncbi.nlm.nih.gov/entrez/query.fcgi?cmd=Retrieve&amp;db=nucleotide&amp;list_uids=4105100&amp;dopt=GenBank</a> |
| 670 | AF043087 | dehydrin 1 (dhn1)                                    | Hordeum vulgare   | 1140 | 1259 | 1140 |      | 2717  | <a href="http://www.ncbi.nlm.nih.gov/entrez/query.fcgi?cmd=Retrieve&amp;db=nucleotide&amp;list_uids=4105102&amp;dopt=GenBank">http://www.ncbi.nlm.nih.gov/entrez/query.fcgi?cmd=Retrieve&amp;db=nucleotide&amp;list_uids=4105102&amp;dopt=GenBank</a> |
| 671 | AF043088 | dehydrin 2 (dhn2)                                    | Hordeum vulgare   | 551  | 662  | 551  |      | 1849  | <a href="http://www.ncbi.nlm.nih.gov/entrez/query.fcgi?cmd=Retrieve&amp;db=nucleotide&amp;list_uids=4105104&amp;dopt=GenBank">http://www.ncbi.nlm.nih.gov/entrez/query.fcgi?cmd=Retrieve&amp;db=nucleotide&amp;list_uids=4105104&amp;dopt=GenBank</a> |
| 672 | AF043089 | dehydrin 3 (dhn3)                                    | Hordeum vulgare   | 625  | 743  | 625  |      | 1560  | <a href="http://www.ncbi.nlm.nih.gov/entrez/query.fcgi?cmd=Retrieve&amp;db=nucleotide&amp;list_uids=4105106&amp;dopt=GenBank">http://www.ncbi.nlm.nih.gov/entrez/query.fcgi?cmd=Retrieve&amp;db=nucleotide&amp;list_uids=4105106&amp;dopt=GenBank</a> |
| 673 | AF043090 | dehydrin 4 (dhn4)                                    | Hordeum vulgare   | 1250 | 1370 | 1250 |      | 2790  | <a href="http://www.ncbi.nlm.nih.gov/entrez/query.fcgi?cmd=Retrieve&amp;db=nucleotide&amp;list_uids=4105108&amp;dopt=GenBank">http://www.ncbi.nlm.nih.gov/entrez/query.fcgi?cmd=Retrieve&amp;db=nucleotide&amp;list_uids=4105108&amp;dopt=GenBank</a> |
| 674 | AF043091 | dehydrin 6 (dhn6)                                    | Hordeum vulgare   | 670  | 795  | 670  |      | 3086  | <a href="http://www.ncbi.nlm.nih.gov/entrez/query.fcgi?cmd=Retrieve&amp;db=nucleotide&amp;list_uids=4105110&amp;dopt=GenBank">http://www.ncbi.nlm.nih.gov/entrez/query.fcgi?cmd=Retrieve&amp;db=nucleotide&amp;list_uids=4105110&amp;dopt=GenBank</a> |
| 675 | AF043092 | dehydrin 7 (dhn7)                                    | Hordeum vulgare   | 406  | 522  | 406  |      | 2127  | <a href="http://www.ncbi.nlm.nih.gov/entrez/query.fcgi?cmd=Retrieve&amp;db=nucleotide&amp;list_uids=4105112&amp;dopt=GenBank">http://www.ncbi.nlm.nih.gov/entrez/query.fcgi?cmd=Retrieve&amp;db=nucleotide&amp;list_uids=4105112&amp;dopt=GenBank</a> |
| 676 | AF043093 | dehydrin 8 (dhn8)                                    | Hordeum vulgare   | 1142 | 1274 | 1142 |      | 2254  | <a href="http://www.ncbi.nlm.nih.gov/entrez/query.fcgi?cmd=Retrieve&amp;db=nucleotide&amp;list_uids=4105114&amp;dopt=GenBank">http://www.ncbi.nlm.nih.gov/entrez/query.fcgi?cmd=Retrieve&amp;db=nucleotide&amp;list_uids=4105114&amp;dopt=GenBank</a> |
| 677 | AF043094 | dehydrin 9 (dhn9)                                    | Hordeum vulgare   | 409  | 676  | 409  |      | 1630  | <a href="http://www.ncbi.nlm.nih.gov/entrez/query.fcgi?cmd=Retrieve&amp;db=nucleotide&amp;list_uids=4105116&amp;dopt=GenBank">http://www.ncbi.nlm.nih.gov/entrez/query.fcgi?cmd=Retrieve&amp;db=nucleotide&amp;list_uids=4105116&amp;dopt=GenBank</a> |
| 678 | AF043095 | dehydrin 10 (dhn10)                                  | Hordeum vulgare   | 1118 | 1258 | 1118 |      | 2984  | <a href="http://www.ncbi.nlm.nih.gov/entrez/query.fcgi?cmd=Retrieve&amp;db=nucleotide&amp;list_uids=4105118&amp;dopt=GenBank">http://www.ncbi.nlm.nih.gov/entrez/query.fcgi?cmd=Retrieve&amp;db=nucleotide&amp;list_uids=4105118&amp;dopt=GenBank</a> |
| 679 | AF043096 | dehydrin 5 (dhn5)                                    | Hordeum vulgare   | 494  | 597  | 494  |      | 2814  | <a href="http://www.ncbi.nlm.nih.gov/entrez/query.fcgi?cmd=Retrieve&amp;db=nucleotide&amp;list_uids=4105120&amp;dopt=GenBank">http://www.ncbi.nlm.nih.gov/entrez/query.fcgi?cmd=Retrieve&amp;db=nucleotide&amp;list_uids=4105120&amp;dopt=GenBank</a> |
| 680 | AF055328 | glucan endo-1,3-beta-glucosidase isoenzyme I (BHVG1) | Hordeum vulgare   | 2209 | 2209 |      |      | 3327  | <a href="http://www.ncbi.nlm.nih.gov/entrez/query.fcgi?cmd=Retrieve&amp;db=nucleotide&amp;list_uids=3037079&amp;dopt=GenBank">http://www.ncbi.nlm.nih.gov/entrez/query.fcgi?cmd=Retrieve&amp;db=nucleotide&amp;list_uids=3037079&amp;dopt=GenBank</a> |
| 681 | AF061203 | beta-amylase (beta-amy1)                             | Hordeum vulgare   | 1354 | 1354 |      |      | 5126  | <a href="http://www.ncbi.nlm.nih.gov/entrez/query.fcgi?cmd=Retrieve&amp;db=nucleotide&amp;list_uids=3779257&amp;dopt=GenBank">http://www.ncbi.nlm.nih.gov/entrez/query.fcgi?cmd=Retrieve&amp;db=nucleotide&amp;list_uids=3779257&amp;dopt=GenBank</a> |
| 682 | AF061204 | NPGS P1296897 beta-amylase (beta-amy1)               | Hordeum vulgare   | 1356 | 1356 |      |      | 4976  | <a href="http://www.ncbi.nlm.nih.gov/entrez/query.fcgi?cmd=Retrieve&amp;db=nucleotide&amp;list_uids=3779259&amp;dopt=GenBank">http://www.ncbi.nlm.nih.gov/entrez/query.fcgi?cmd=Retrieve&amp;db=nucleotide&amp;list_uids=3779259&amp;dopt=GenBank</a> |
| 683 | AF064562 | starch branching enzyme Ila (sbella)                 | Hordeum vulgare   | 764  | 1217 | 764  | 727  | 1852  | <a href="http://www.ncbi.nlm.nih.gov/entrez/query.fcgi?cmd=Retrieve&amp;db=nucleotide&amp;list_uids=3851525&amp;dopt=GenBank">http://www.ncbi.nlm.nih.gov/entrez/query.fcgi?cmd=Retrieve&amp;db=nucleotide&amp;list_uids=3851525&amp;dopt=GenBank</a> |
| 684 | AF064563 | starch branching enzyme Iib (sbellb)                 | Hordeum vulgare   | 469  | 583  | 469  | 435  | 3960  | <a href="http://www.ncbi.nlm.nih.gov/entrez/query.fcgi?cmd=Retrieve&amp;db=nucleotide&amp;list_uids=3851527&amp;dopt=GenBank">http://www.ncbi.nlm.nih.gov/entrez/query.fcgi?cmd=Retrieve&amp;db=nucleotide&amp;list_uids=3851527&amp;dopt=GenBank</a> |
| 685 | AF075270 | high affinity sulfate transporter (HVST1)            | Hordeum vulgare   | 1090 |      | 1090 | 1025 | 1094  | <a href="http://www.ncbi.nlm.nih.gov/entrez/query.fcgi?cmd=Retrieve&amp;db=nucleotide&amp;list_uids=3643823&amp;dopt=GenBank">http://www.ncbi.nlm.nih.gov/entrez/query.fcgi?cmd=Retrieve&amp;db=nucleotide&amp;list_uids=3643823&amp;dopt=GenBank</a> |
| 686 | AF085165 | receptor-like kinase LRK10                           | Hordeum vulgare   | 209  | 209  |      |      | 989   | <a href="http://www.ncbi.nlm.nih.gov/entrez/query.fcgi?cmd=Retrieve&amp;db=nucleotide&amp;list_uids=5523853&amp;dopt=GenBank">http://www.ncbi.nlm.nih.gov/entrez/query.fcgi?cmd=Retrieve&amp;db=nucleotide&amp;list_uids=5523853&amp;dopt=GenBank</a> |
| 687 | AF085167 | receptor-like kinase ARK1AS                          | Hordeum vulgare   | 328  | 328  |      |      | 2849  | <a href="http://www.ncbi.nlm.nih.gov/entrez/query.fcgi?cmd=Retrieve&amp;db=nucleotide&amp;list_uids=5523857&amp;dopt=GenBank">http://www.ncbi.nlm.nih.gov/entrez/query.fcgi?cmd=Retrieve&amp;db=nucleotide&amp;list_uids=5523857&amp;dopt=GenBank</a> |
| 688 | AF100771 | receptor-like kinase (Hv3ARK)                        | Hordeum vulgare   | 671  | 671  |      |      | 3494  | <a href="http://www.ncbi.nlm.nih.gov/entrez/query.fcgi?cmd=Retrieve&amp;db=nucleotide&amp;list_uids=5669673&amp;dopt=GenBank">http://www.ncbi.nlm.nih.gov/entrez/query.fcgi?cmd=Retrieve&amp;db=nucleotide&amp;list_uids=5669673&amp;dopt=GenBank</a> |
| 689 | AF108008 | HV1LRR1 (HV1LRR1)                                    | Hordeum vulgare   | 346  | 346  |      |      | 5163  | <a href="http://www.ncbi.nlm.nih.gov/entrez/query.fcgi?cmd=Retrieve&amp;db=nucleotide&amp;list_uids=5669777&amp;dopt=GenBank">http://www.ncbi.nlm.nih.gov/entrez/query.fcgi?cmd=Retrieve&amp;db=nucleotide&amp;list_uids=5669777&amp;dopt=GenBank</a> |
| 690 | AF108009 | HV1PST (Hv1Pst)                                      | Hordeum vulgare   | 1872 | 1872 |      |      | 3207  | <a href="http://www.ncbi.nlm.nih.gov/entrez/query.fcgi?cmd=Retrieve&amp;db=nucleotide&amp;list_uids=5669798&amp;dopt=GenBank">http://www.ncbi.nlm.nih.gov/entrez/query.fcgi?cmd=Retrieve&amp;db=nucleotide&amp;list_uids=5669798&amp;dopt=GenBank</a> |
| 691 | AF122050 | limit dextrinase                                     | Hordeum vulgare   | 1720 | 1720 |      |      | 11462 | <a href="http://www.ncbi.nlm.nih.gov/entrez/query.fcgi?cmd=Retrieve&amp;db=nucleotide&amp;list_uids=4959435&amp;dopt=GenBank">http://www.ncbi.nlm.nih.gov/entrez/query.fcgi?cmd=Retrieve&amp;db=nucleotide&amp;list_uids=4959435&amp;dopt=GenBank</a> |
| 692 | AF142588 | isoamylase 1                                         | Hordeum vulgare   | 2318 | 2318 |      |      | 3291  | <a href="http://www.ncbi.nlm.nih.gov/entrez/query.fcgi?cmd=Retrieve&amp;db=nucleotide&amp;list_uids=5825469&amp;dopt=GenBank">http://www.ncbi.nlm.nih.gov/entrez/query.fcgi?cmd=Retrieve&amp;db=nucleotide&amp;list_uids=5825469&amp;dopt=GenBank</a> |
| 693 | AF155129 | dehydrin 12 (Dhn12)                                  | Hordeum vulgare   | 1379 | 1379 |      |      | 2890  | <a href="http://www.ncbi.nlm.nih.gov/entrez/query.fcgi?cmd=Retrieve&amp;db=nucleotide&amp;list_uids=5052008&amp;dopt=GenBank">http://www.ncbi.nlm.nih.gov/entrez/query.fcgi?cmd=Retrieve&amp;db=nucleotide&amp;list_uids=5052008&amp;dopt=GenBank</a> |
| 694 | AF166121 | Cf2/Cf5 disease resistance protein homolog (Big1)    | Hordeum vulgare   | 2872 | 2872 |      |      | 7351  | <a href="http://www.ncbi.nlm.nih.gov/entrez/query.fcgi?cmd=Retrieve&amp;db=nucleotide&amp;list_uids=5739322&amp;dopt=GenBank">http://www.ncbi.nlm.nih.gov/entrez/query.fcgi?cmd=Retrieve&amp;db=nucleotide&amp;list_uids=5739322&amp;dopt=GenBank</a> |
| 695 | AF181452 | dehydrin (Dhn2)                                      | Hordeum vulgare   | 656  | 656  |      |      | 1294  | <a href="http://www.ncbi.nlm.nih.gov/entrez/query.fcgi?cmd=Retrieve&amp;db=nucleotide&amp;list_uids=6017929&amp;dopt=GenBank">http://www.ncbi.nlm.nih.gov/entrez/query.fcgi?cmd=Retrieve&amp;db=nucleotide&amp;list_uids=6017929&amp;dopt=GenBank</a> |
| 696 | AF181454 | dehydrin (Dhn4)                                      | Hordeum vulgare   | 846  | 846  |      |      | 2440  | <a href="http://www.ncbi.nlm.nih.gov/entrez/query.fcgi?cmd=Retrieve&amp;db=nucleotide&amp;list_uids=6017933&amp;dopt=GenBank">http://www.ncbi.nlm.nih.gov/entrez/query.fcgi?cmd=Retrieve&amp;db=nucleotide&amp;list_uids=6017933&amp;dopt=GenBank</a> |
| 697 | AF181455 | dehydrin (Dhn5)                                      | Hordeum vulgare   | 599  | 599  |      |      | 3447  | <a href="http://www.ncbi.nlm.nih.gov/entrez/query.fcgi?cmd=Retrieve&amp;db=nucleotide&amp;list_uids=6017935&amp;dopt=GenBank">http://www.ncbi.nlm.nih.gov/entrez/query.fcgi?cmd=Retrieve&amp;db=nucleotide&amp;list_uids=6017935&amp;dopt=GenBank</a> |
| 698 | AF181459 | dehydrin (Dhn9)                                      | Hordeum vulgare   | 618  | 618  |      |      | 1791  | <a href="http://www.ncbi.nlm.nih.gov/entrez/query.fcgi?cmd=Retrieve&amp;db=nucleotide&amp;list_uids=6017943&amp;dopt=GenBank">http://www.ncbi.nlm.nih.gov/entrez/query.fcgi?cmd=Retrieve&amp;db=nucleotide&amp;list_uids=6017943&amp;dopt=GenBank</a> |
| 699 | AF181460 | dehydrin (Dhn10)                                     | Hordeum vulgare   | 860  | 860  |      |      | 2501  | <a href="http://www.ncbi.nlm.nih.gov/entrez/query.fcgi?cmd=Retrieve&amp;db=nucleotide&amp;list_uids=6017945&amp;dopt=GenBank">http://www.ncbi.nlm.nih.gov/entrez/query.fcgi?cmd=Retrieve&amp;db=nucleotide&amp;list_uids=6017945&amp;dopt=GenBank</a> |
| 700 | AF181461 | dehydrin (Dhn11)                                     | Hordeum vulgare   | 836  | 836  |      |      | 2009  | <a href="http://www.ncbi.nlm.nih.gov/entrez/query.fcgi?cmd=Retrieve&amp;db=nucleotide&amp;list_uids=6017947&amp;dopt=GenBank">http://www.ncbi.nlm.nih.gov/entrez/query.fcgi?cmd=Retrieve&amp;db=nucleotide&amp;list_uids=6017947&amp;dopt=GenBank</a> |



|     |          |                                                          |                 |          |      |           |       |                                                                                                                                                                                                                                                               |  |
|-----|----------|----------------------------------------------------------|-----------------|----------|------|-----------|-------|---------------------------------------------------------------------------------------------------------------------------------------------------------------------------------------------------------------------------------------------------------------|--|
| 701 | AF182197 | RNase S-like protein precursor (rsh1)                    | Hordeum vulgare | 1726     | 1843 | 1726      | 3758  | <a href="http://www.ncbi.nlm.nih.gov/80/entrez/query.fcgi?cmd=Retrieve&amp;db=nucleotide&amp;list_uids=7288254&amp;dopt=GenBank">http://www.ncbi.nlm.nih.gov/80/entrez/query.fcgi?cmd=Retrieve&amp;db=nucleotide&amp;list_uids=7288254&amp;dopt=GenBank</a>   |  |
| 702 | AF189787 | putative c-myb-like transcription factor (MYB3R-1)       | Hordeum vulgare | 413      | 413  |           | 2517  | <a href="http://www.ncbi.nlm.nih.gov/80/entrez/query.fcgi?cmd=Retrieve&amp;db=nucleotide&amp;list_uids=8745324&amp;dopt=GenBank">http://www.ncbi.nlm.nih.gov/80/entrez/query.fcgi?cmd=Retrieve&amp;db=nucleotide&amp;list_uids=8745324&amp;dopt=GenBank</a>   |  |
| 703 | AF234170 | DMC1 protein                                             | Hordeum vulgare | 1601     | 1601 |           | 5645  | <a href="http://www.ncbi.nlm.nih.gov/80/entrez/query.fcgi?cmd=Retrieve&amp;db=nucleotide&amp;list_uids=7229682&amp;dopt=GenBank">http://www.ncbi.nlm.nih.gov/80/entrez/query.fcgi?cmd=Retrieve&amp;db=nucleotide&amp;list_uids=7229682&amp;dopt=GenBank</a>   |  |
| 704 | AF250933 | germin A (GerA)                                          | Hordeum vulgare | 214      | 214  |           | 1243  | <a href="http://www.ncbi.nlm.nih.gov/80/entrez/query.fcgi?cmd=Retrieve&amp;db=nucleotide&amp;list_uids=9837110&amp;dopt=GenBank">http://www.ncbi.nlm.nih.gov/80/entrez/query.fcgi?cmd=Retrieve&amp;db=nucleotide&amp;list_uids=9837110&amp;dopt=GenBank</a>   |  |
| 705 | AF250934 | germin B (GerB)                                          | Hordeum vulgare | 1591     | 1591 |           | 2798  | <a href="http://www.ncbi.nlm.nih.gov/80/entrez/query.fcgi?cmd=Retrieve&amp;db=nucleotide&amp;list_uids=9837112&amp;dopt=GenBank">http://www.ncbi.nlm.nih.gov/80/entrez/query.fcgi?cmd=Retrieve&amp;db=nucleotide&amp;list_uids=9837112&amp;dopt=GenBank</a>   |  |
| 706 | AF250935 | germin F (GerF)                                          | Hordeum vulgare | 1480     | 1480 |           | 2689  | <a href="http://www.ncbi.nlm.nih.gov/80/entrez/query.fcgi?cmd=Retrieve&amp;db=nucleotide&amp;list_uids=9837114&amp;dopt=GenBank">http://www.ncbi.nlm.nih.gov/80/entrez/query.fcgi?cmd=Retrieve&amp;db=nucleotide&amp;list_uids=9837114&amp;dopt=GenBank</a>   |  |
| 707 | AF250936 | germin D (GerD)                                          | Hordeum vulgare | 396      | 396  |           | 1272  | <a href="http://www.ncbi.nlm.nih.gov/80/entrez/query.fcgi?cmd=Retrieve&amp;db=nucleotide&amp;list_uids=9837116&amp;dopt=GenBank">http://www.ncbi.nlm.nih.gov/80/entrez/query.fcgi?cmd=Retrieve&amp;db=nucleotide&amp;list_uids=9837116&amp;dopt=GenBank</a>   |  |
| 708 | AF253472 | alcohol dehydrogenase (Adh1)                             | Hordeum vulgare | 1326     |      | 1326      | 4309  | <a href="http://www.ncbi.nlm.nih.gov/80/entrez/query.fcgi?cmd=Retrieve&amp;db=nucleotide&amp;list_uids=13924732&amp;dopt=GenBank">http://www.ncbi.nlm.nih.gov/80/entrez/query.fcgi?cmd=Retrieve&amp;db=nucleotide&amp;list_uids=13924732&amp;dopt=GenBank</a> |  |
| 709 | AF287726 | clone pFL699 1,4-beta-D xylan xylohydrolase              | Hordeum vulgare | 1822     | 1822 |           | 5474  | <a href="http://www.ncbi.nlm.nih.gov/80/entrez/query.fcgi?cmd=Retrieve&amp;db=nucleotide&amp;list_uids=14861198&amp;dopt=GenBank">http://www.ncbi.nlm.nih.gov/80/entrez/query.fcgi?cmd=Retrieve&amp;db=nucleotide&amp;list_uids=14861198&amp;dopt=GenBank</a> |  |
| 710 | AF294752 | CBF3-like protein BCBF3 (BCBF3)                          | Hordeum vulgare | 1065     | 1065 | 955       | 3321  | <a href="http://www.ncbi.nlm.nih.gov/80/entrez/query.fcgi?cmd=Retrieve&amp;db=nucleotide&amp;list_uids=9937515&amp;dopt=GenBank">http://www.ncbi.nlm.nih.gov/80/entrez/query.fcgi?cmd=Retrieve&amp;db=nucleotide&amp;list_uids=9937515&amp;dopt=GenBank</a>   |  |
| 711 | AF294753 | glutaryl-HRNA reductase (hema2)                          | Hordeum vulgare | 739      | 739  | 647       | 1979  | <a href="http://www.ncbi.nlm.nih.gov/80/entrez/query.fcgi?cmd=Retrieve&amp;db=nucleotide&amp;list_uids=9937517&amp;dopt=GenBank">http://www.ncbi.nlm.nih.gov/80/entrez/query.fcgi?cmd=Retrieve&amp;db=nucleotide&amp;list_uids=9937517&amp;dopt=GenBank</a>   |  |
| 712 | AF298231 | CBF3-like protein BCBF3 (BCBF3)                          | Hordeum vulgare | 533      | 533  |           | 1922  | <a href="http://www.ncbi.nlm.nih.gov/80/entrez/query.fcgi?cmd=Retrieve&amp;db=nucleotide&amp;list_uids=12658320&amp;dopt=GenBank">http://www.ncbi.nlm.nih.gov/80/entrez/query.fcgi?cmd=Retrieve&amp;db=nucleotide&amp;list_uids=12658320&amp;dopt=GenBank</a> |  |
| 713 | AF330255 | possible membrane protein LEM1 (Lem1)                    | Hordeum vulgare | 1290     |      | 1290 1228 | 2772  | <a href="http://www.ncbi.nlm.nih.gov/80/entrez/query.fcgi?cmd=Retrieve&amp;db=nucleotide&amp;list_uids=14276860&amp;dopt=GenBank">http://www.ncbi.nlm.nih.gov/80/entrez/query.fcgi?cmd=Retrieve&amp;db=nucleotide&amp;list_uids=14276860&amp;dopt=GenBank</a> |  |
| 714 | AF334758 | homeodomain protein JUBEL1 (JuBel1)                      | Hordeum vulgare | 2801     |      | 2801 2335 | 13757 | <a href="http://www.ncbi.nlm.nih.gov/80/entrez/query.fcgi?cmd=Retrieve&amp;db=nucleotide&amp;list_uids=13752406&amp;dopt=GenBank">http://www.ncbi.nlm.nih.gov/80/entrez/query.fcgi?cmd=Retrieve&amp;db=nucleotide&amp;list_uids=13752406&amp;dopt=GenBank</a> |  |
| 715 | AF334759 | homeodomain protein JUBEL2 (JuBel2)                      | Hordeum vulgare | 4282     |      | 4282 4271 | 9112  | <a href="http://www.ncbi.nlm.nih.gov/80/entrez/query.fcgi?cmd=Retrieve&amp;db=nucleotide&amp;list_uids=13752408&amp;dopt=GenBank">http://www.ncbi.nlm.nih.gov/80/entrez/query.fcgi?cmd=Retrieve&amp;db=nucleotide&amp;list_uids=13752408&amp;dopt=GenBank</a> |  |
| 716 | AF343066 | Dhn4 gene, Dhn4s allele                                  | Hordeum vulgare | 1282     |      |           | 1282  | <a href="http://www.ncbi.nlm.nih.gov/80/entrez/query.fcgi?cmd=Retrieve&amp;db=nucleotide&amp;list_uids=1687455&amp;dopt=GenBank">http://www.ncbi.nlm.nih.gov/80/entrez/query.fcgi?cmd=Retrieve&amp;db=nucleotide&amp;list_uids=1687455&amp;dopt=GenBank</a>   |  |
| 717 | AF343067 | HVA1 gene, HVA1s allele                                  | Hordeum vulgare | 466      |      |           | 466   | <a href="http://www.ncbi.nlm.nih.gov/80/entrez/query.fcgi?cmd=Retrieve&amp;db=nucleotide&amp;list_uids=1687455&amp;dopt=GenBank">http://www.ncbi.nlm.nih.gov/80/entrez/query.fcgi?cmd=Retrieve&amp;db=nucleotide&amp;list_uids=1687455&amp;dopt=GenBank</a>   |  |
| 718 | AF343068 | Dhn8 gene, Dhn8s allele                                  | Hordeum vulgare | 1250     |      | 1122      | 1250  | <a href="http://www.ncbi.nlm.nih.gov/80/entrez/query.fcgi?cmd=Retrieve&amp;db=nucleotide&amp;list_uids=1687455&amp;dopt=GenBank">http://www.ncbi.nlm.nih.gov/80/entrez/query.fcgi?cmd=Retrieve&amp;db=nucleotide&amp;list_uids=1687455&amp;dopt=GenBank</a>   |  |
| 719 | AF414177 | clone plic20G1 NBS-LRR-like protein                      | Hordeum vulgare | 833      | 833  |           | 6291  | <a href="http://www.ncbi.nlm.nih.gov/80/entrez/query.fcgi?cmd=Retrieve&amp;db=nucleotide&amp;list_uids=15788519&amp;dopt=GenBank">http://www.ncbi.nlm.nih.gov/80/entrez/query.fcgi?cmd=Retrieve&amp;db=nucleotide&amp;list_uids=15788519&amp;dopt=GenBank</a> |  |
| 720 | AF459084 | BAC 615K1 SNF2P (Snf2P) gene                             | Hordeum vulgare | 3001     | 3001 |           | 18750 | <a href="http://www.ncbi.nlm.nih.gov/80/entrez/query.fcgi?cmd=Retrieve&amp;db=nucleotide&amp;list_uids=2319347&amp;dopt=GenBank">http://www.ncbi.nlm.nih.gov/80/entrez/query.fcgi?cmd=Retrieve&amp;db=nucleotide&amp;list_uids=2319347&amp;dopt=GenBank</a>   |  |
| 721 | AF459085 | SNF2P (Snf2P)                                            | Hordeum vulgare | 116      | 116  |           | 7963  | <a href="http://www.ncbi.nlm.nih.gov/80/entrez/query.fcgi?cmd=Retrieve&amp;db=nucleotide&amp;list_uids=23193480&amp;dopt=GenBank">http://www.ncbi.nlm.nih.gov/80/entrez/query.fcgi?cmd=Retrieve&amp;db=nucleotide&amp;list_uids=23193480&amp;dopt=GenBank</a> |  |
| 722 | AF460219 | nuclear transcription factor SLN1                        | Hordeum vulgare | 1765     | 1765 |           | 4098  | <a href="http://www.ncbi.nlm.nih.gov/80/entrez/query.fcgi?cmd=Retrieve&amp;db=nucleotide&amp;list_uids=18264372&amp;dopt=GenBank">http://www.ncbi.nlm.nih.gov/80/entrez/query.fcgi?cmd=Retrieve&amp;db=nucleotide&amp;list_uids=18264372&amp;dopt=GenBank</a> |  |
| 723 | AF474923 | chalcone isomerase (CHI)                                 | Hordeum vulgare | 6937     | 6937 |           | 11475 | <a href="http://www.ncbi.nlm.nih.gov/80/entrez/query.fcgi?cmd=Retrieve&amp;db=nucleotide&amp;list_uids=20152985&amp;dopt=GenBank">http://www.ncbi.nlm.nih.gov/80/entrez/query.fcgi?cmd=Retrieve&amp;db=nucleotide&amp;list_uids=20152985&amp;dopt=GenBank</a> |  |
| 724 | AF486508 | granule-bound starch synthase I                          | Hordeum vulgare | 710      | 710  |           | 1195  | <a href="http://www.ncbi.nlm.nih.gov/80/entrez/query.fcgi?cmd=Retrieve&amp;db=nucleotide&amp;list_uids=21667421&amp;dopt=GenBank">http://www.ncbi.nlm.nih.gov/80/entrez/query.fcgi?cmd=Retrieve&amp;db=nucleotide&amp;list_uids=21667421&amp;dopt=GenBank</a> |  |
| 725 | AF490468 | CONSTANS-like protein (CO1)                              | Hordeum vulgare | 1419     | 1419 |           | 4071  | <a href="http://www.ncbi.nlm.nih.gov/80/entrez/query.fcgi?cmd=Retrieve&amp;db=nucleotide&amp;list_uids=21667472&amp;dopt=GenBank">http://www.ncbi.nlm.nih.gov/80/entrez/query.fcgi?cmd=Retrieve&amp;db=nucleotide&amp;list_uids=21667472&amp;dopt=GenBank</a> |  |
| 726 | AF490470 | CONSTANS-like protein (CO2)                              | Hordeum vulgare | 139      | 139  |           | 2263  | <a href="http://www.ncbi.nlm.nih.gov/80/entrez/query.fcgi?cmd=Retrieve&amp;db=nucleotide&amp;list_uids=21667476&amp;dopt=GenBank">http://www.ncbi.nlm.nih.gov/80/entrez/query.fcgi?cmd=Retrieve&amp;db=nucleotide&amp;list_uids=21667476&amp;dopt=GenBank</a> |  |
| 727 | AF490474 | CONSTANS-like protein (CO4)                              | Hordeum vulgare | 636      | 636  |           | 1085  | <a href="http://www.ncbi.nlm.nih.gov/80/entrez/query.fcgi?cmd=Retrieve&amp;db=nucleotide&amp;list_uids=21667484&amp;dopt=GenBank">http://www.ncbi.nlm.nih.gov/80/entrez/query.fcgi?cmd=Retrieve&amp;db=nucleotide&amp;list_uids=21667484&amp;dopt=GenBank</a> |  |
| 728 | AF509744 | receptor-like kinase                                     | Hordeum vulgare | 1308     | 1308 |           | 4643  | <a href="http://www.ncbi.nlm.nih.gov/80/entrez/query.fcgi?cmd=Retrieve&amp;db=nucleotide&amp;list_uids=21886729&amp;dopt=GenBank">http://www.ncbi.nlm.nih.gov/80/entrez/query.fcgi?cmd=Retrieve&amp;db=nucleotide&amp;list_uids=21886729&amp;dopt=GenBank</a> |  |
| 729 | AF509745 | receptor-like kinase                                     | Hordeum vulgare | 612      | 612  |           | 2550  | <a href="http://www.ncbi.nlm.nih.gov/80/entrez/query.fcgi?cmd=Retrieve&amp;db=nucleotide&amp;list_uids=21886731&amp;dopt=GenBank">http://www.ncbi.nlm.nih.gov/80/entrez/query.fcgi?cmd=Retrieve&amp;db=nucleotide&amp;list_uids=21886731&amp;dopt=GenBank</a> |  |
| 730 | AF509746 | OSU6 receptor-like kinase                                | Hordeum vulgare | 587      | 587  |           | 2513  | <a href="http://www.ncbi.nlm.nih.gov/80/entrez/query.fcgi?cmd=Retrieve&amp;db=nucleotide&amp;list_uids=21886733&amp;dopt=GenBank">http://www.ncbi.nlm.nih.gov/80/entrez/query.fcgi?cmd=Retrieve&amp;db=nucleotide&amp;list_uids=21886733&amp;dopt=GenBank</a> |  |
| 731 | AF509748 | barley stem rust resistance protein (Rpg1)               | Hordeum vulgare | 6464     | 6464 |           | 17974 | <a href="http://www.ncbi.nlm.nih.gov/80/entrez/query.fcgi?cmd=Retrieve&amp;db=nucleotide&amp;list_uids=21929720&amp;dopt=GenBank">http://www.ncbi.nlm.nih.gov/80/entrez/query.fcgi?cmd=Retrieve&amp;db=nucleotide&amp;list_uids=21929720&amp;dopt=GenBank</a> |  |
| 732 | AY008692 | transcription factor GAMyb (Gamyb)                       | Hordeum vulgare | 1934     |      | 1934 1083 | 6228  | <a href="http://www.ncbi.nlm.nih.gov/80/entrez/query.fcgi?cmd=Retrieve&amp;db=nucleotide&amp;list_uids=13236695&amp;dopt=GenBank">http://www.ncbi.nlm.nih.gov/80/entrez/query.fcgi?cmd=Retrieve&amp;db=nucleotide&amp;list_uids=13236695&amp;dopt=GenBank</a> |  |
| 733 | AY009938 | Mia1 (Mia1)                                              | Hordeum vulgare | 2499     | 2588 | 2499      | 7900  | <a href="http://www.ncbi.nlm.nih.gov/80/entrez/query.fcgi?cmd=Retrieve&amp;db=nucleotide&amp;list_uids=1161220&amp;dopt=GenBank">http://www.ncbi.nlm.nih.gov/80/entrez/query.fcgi?cmd=Retrieve&amp;db=nucleotide&amp;list_uids=1161220&amp;dopt=GenBank</a>   |  |
| 734 | AY039003 | Mg-chelatase subunit XANTHA-F (Xantha-f)                 | Hordeum vulgare | 883      | 883  | 825       | 6252  | <a href="http://www.ncbi.nlm.nih.gov/80/entrez/query.fcgi?cmd=Retrieve&amp;db=nucleotide&amp;list_uids=14861034&amp;dopt=GenBank">http://www.ncbi.nlm.nih.gov/80/entrez/query.fcgi?cmd=Retrieve&amp;db=nucleotide&amp;list_uids=14861034&amp;dopt=GenBank</a> |  |
| 735 | AY082965 | CONSTANS-like protein CO9 (CO9)                          | Hordeum vulgare | 409      | 409  |           | 944   | <a href="http://www.ncbi.nlm.nih.gov/80/entrez/query.fcgi?cmd=Retrieve&amp;db=nucleotide&amp;list_uids=21655161&amp;dopt=GenBank">http://www.ncbi.nlm.nih.gov/80/entrez/query.fcgi?cmd=Retrieve&amp;db=nucleotide&amp;list_uids=21655161&amp;dopt=GenBank</a> |  |
| 736 | AY137515 | hypersensitive-induced reaction protein 4 (hir4)         | Hordeum vulgare | 1499     | 1629 | 1499      | 4830  | <a href="http://www.ncbi.nlm.nih.gov/80/entrez/query.fcgi?cmd=Retrieve&amp;db=nucleotide&amp;list_uids=23345037&amp;dopt=GenBank">http://www.ncbi.nlm.nih.gov/80/entrez/query.fcgi?cmd=Retrieve&amp;db=nucleotide&amp;list_uids=23345037&amp;dopt=GenBank</a> |  |
| 737 | AY137516 | hypersensitive-induced reaction protein 2 (hir2)         | Hordeum vulgare | 1104     | 2874 | 1104      | 5125  | <a href="http://www.ncbi.nlm.nih.gov/80/entrez/query.fcgi?cmd=Retrieve&amp;db=nucleotide&amp;list_uids=23345039&amp;dopt=GenBank">http://www.ncbi.nlm.nih.gov/80/entrez/query.fcgi?cmd=Retrieve&amp;db=nucleotide&amp;list_uids=23345039&amp;dopt=GenBank</a> |  |
| 738 | AY137518 | protein                                                  | Hordeum vulgare | 822      | 2493 | 822       | 7567  | <a href="http://www.ncbi.nlm.nih.gov/80/entrez/query.fcgi?cmd=Retrieve&amp;db=nucleotide&amp;list_uids=23345051&amp;dopt=GenBank">http://www.ncbi.nlm.nih.gov/80/entrez/query.fcgi?cmd=Retrieve&amp;db=nucleotide&amp;list_uids=23345051&amp;dopt=GenBank</a> |  |
| 739 | L19119   | abscisic acid and stress inducible (A22)                 | Hordeum vulgare | 1756     | 1933 | 1756 1722 | 3531  | <a href="http://www.ncbi.nlm.nih.gov/80/entrez/query.fcgi?cmd=Retrieve&amp;db=nucleotide&amp;list_uids=3042178&amp;dopt=GenBank">http://www.ncbi.nlm.nih.gov/80/entrez/query.fcgi?cmd=Retrieve&amp;db=nucleotide&amp;list_uids=3042178&amp;dopt=GenBank</a>   |  |
| 740 | M58753   | acyl carrier protein I (Acl1)                            | Hordeum vulgare | 605      | 748  | 605       | 3822  | <a href="http://www.ncbi.nlm.nih.gov/80/entrez/query.fcgi?cmd=Retrieve&amp;db=nucleotide&amp;list_uids=1669668&amp;dopt=GenBank">http://www.ncbi.nlm.nih.gov/80/entrez/query.fcgi?cmd=Retrieve&amp;db=nucleotide&amp;list_uids=1669668&amp;dopt=GenBank</a>   |  |
| 741 | M58754   | acyl carrier protein III (Acl3)                          | Hordeum vulgare | 1473     | 1585 | 1473      | 4830  | <a href="http://www.ncbi.nlm.nih.gov/80/entrez/query.fcgi?cmd=Retrieve&amp;db=nucleotide&amp;list_uids=1669708&amp;dopt=GenBank">http://www.ncbi.nlm.nih.gov/80/entrez/query.fcgi?cmd=Retrieve&amp;db=nucleotide&amp;list_uids=1669708&amp;dopt=GenBank</a>   |  |
| 742 | M15208   | high pi isozyme of alpha-amylase                         | Hordeum vulgare | 689      | 689  | 606       | 2717  | <a href="http://www.ncbi.nlm.nih.gov/80/entrez/query.fcgi?cmd=Retrieve&amp;db=nucleotide&amp;list_uids=167008&amp;dopt=GenBank">http://www.ncbi.nlm.nih.gov/80/entrez/query.fcgi?cmd=Retrieve&amp;db=nucleotide&amp;list_uids=167008&amp;dopt=GenBank</a>     |  |
| 743 | L41869   | L. beta-glucosidase (BGQ60)                              | Hordeum vulgare | 251      | 251  | 152       | 4152  | <a href="http://www.ncbi.nlm.nih.gov/80/entrez/query.fcgi?cmd=Retrieve&amp;db=nucleotide&amp;list_uids=804655&amp;dopt=GenBank">http://www.ncbi.nlm.nih.gov/80/entrez/query.fcgi?cmd=Retrieve&amp;db=nucleotide&amp;list_uids=804655&amp;dopt=GenBank</a>     |  |
| 744 | M95172   | chloroplast beta-ketoacyl-ACP synthase I isozyme (Kas12) | Hordeum vulgare | 1261     | 1432 | 1261 1221 | 6319  | <a href="http://www.ncbi.nlm.nih.gov/80/entrez/query.fcgi?cmd=Retrieve&amp;db=nucleotide&amp;list_uids=1670058&amp;dopt=GenBank">http://www.ncbi.nlm.nih.gov/80/entrez/query.fcgi?cmd=Retrieve&amp;db=nucleotide&amp;list_uids=1670058&amp;dopt=GenBank</a>   |  |
| 745 | L36882   | thionin (bth6)                                           | Hordeum vulgare | 1531     | 1531 | 1440      | 2406  | <a href="http://www.ncbi.nlm.nih.gov/80/entrez/query.fcgi?cmd=Retrieve&amp;db=nucleotide&amp;list_uids=1209248&amp;dopt=GenBank">http://www.ncbi.nlm.nih.gov/80/entrez/query.fcgi?cmd=Retrieve&amp;db=nucleotide&amp;list_uids=1209248&amp;dopt=GenBank</a>   |  |
| 746 | L36883   | thionin (BTH7)                                           | Hordeum vulgare | 1552     | 1552 | 1461      | 2259  | <a href="http://www.ncbi.nlm.nih.gov/80/entrez/query.fcgi?cmd=Retrieve&amp;db=nucleotide&amp;list_uids=1209250&amp;dopt=GenBank">http://www.ncbi.nlm.nih.gov/80/entrez/query.fcgi?cmd=Retrieve&amp;db=nucleotide&amp;list_uids=1209250&amp;dopt=GenBank</a>   |  |
| 747 | L34211   | chitinase (CHI33)                                        | Hordeum vulgare | 682      | 682  | 614       | 1779  | <a href="http://www.ncbi.nlm.nih.gov/80/entrez/query.fcgi?cmd=Retrieve&amp;db=nucleotide&amp;list_uids=576566&amp;dopt=GenBank">http://www.ncbi.nlm.nih.gov/80/entrez/query.fcgi?cmd=Retrieve&amp;db=nucleotide&amp;list_uids=576566&amp;dopt=GenBank</a>     |  |
| 748 | M95810   | dehydrin DHN5 (Dhn5)                                     | Hordeum vulgare | 592      |      |           | 2432  | <a href="http://www.ncbi.nlm.nih.gov/80/entrez/query.fcgi?cmd=Retrieve&amp;db=nucleotide&amp;list_uids=167035&amp;dopt=GenBank">http://www.ncbi.nlm.nih.gov/80/entrez/query.fcgi?cmd=Retrieve&amp;db=nucleotide&amp;list_uids=167035&amp;dopt=GenBank</a>     |  |
| 749 | L06607   | photosystem I subunit C (PsaC)                           | Hordeum vulgare | 391      |      | 391 65    | 458   | <a href="http://www.ncbi.nlm.nih.gov/80/entrez/query.fcgi?cmd=Retrieve&amp;db=nucleotide&amp;list_uids=167037&amp;dopt=GenBank">http://www.ncbi.nlm.nih.gov/80/entrez/query.fcgi?cmd=Retrieve&amp;db=nucleotide&amp;list_uids=167037&amp;dopt=GenBank</a>     |  |
| 750 | M36378   | gamma-1 hordein storage protein                          | Hordeum vulgare | 379      | 379  |           | 1614  | <a href="http://www.ncbi.nlm.nih.gov/80/entrez/query.fcgi?cmd=Retrieve&amp;db=nucleotide&amp;list_uids=167041&amp;dopt=GenBank">http://www.ncbi.nlm.nih.gov/80/entrez/query.fcgi?cmd=Retrieve&amp;db=nucleotide&amp;list_uids=167041&amp;dopt=GenBank</a>     |  |
| 751 | M62740   | 1,3-1,4-beta-D glucan 4-glucohydrolase (Glb 2)           | Hordeum vulgare | 941      | 941  |           | 5159  | <a href="http://www.ncbi.nlm.nih.gov/80/entrez/query.fcgi?cmd=Retrieve&amp;db=nucleotide&amp;list_uids=167049&amp;dopt=GenBank">http://www.ncbi.nlm.nih.gov/80/entrez/query.fcgi?cmd=Retrieve&amp;db=nucleotide&amp;list_uids=167049&amp;dopt=GenBank</a>     |  |
| 752 | M96940   | glucan endo-1,3-beta-glucosidase (isoenzyme IV)          | Hordeum vulgare | 428      | 428  |           | 1813  | <a href="http://www.ncbi.nlm.nih.gov/80/entrez/query.fcgi?cmd=Retrieve&amp;db=nucleotide&amp;list_uids=167052&amp;dopt=GenBank">http://www.ncbi.nlm.nih.gov/80/entrez/query.fcgi?cmd=Retrieve&amp;db=nucleotide&amp;list_uids=167052&amp;dopt=GenBank</a>     |  |
| 753 | M91814   | beta-1,3-glucanase (GLUZ)                                | Hordeum vulgare | 591      |      | 591 520   | 2301  | <a href="http://www.ncbi.nlm.nih.gov/80/entrez/query.fcgi?cmd=Retrieve&amp;db=nucleotide&amp;list_uids=347943&amp;dopt=GenBank">http://www.ncbi.nlm.nih.gov/80/entrez/query.fcgi?cmd=Retrieve&amp;db=nucleotide&amp;list_uids=347943&amp;dopt=GenBank</a>     |  |
| 754 | M23080   | alpha-hordothionin (Hth-1)                               | Hordeum vulgare | 325      | 372  | 325 325   | 1805  | <a href="http://www.ncbi.nlm.nih.gov/80/entrez/query.fcgi?cmd=Retrieve&amp;db=nucleotide&amp;list_uids=340805&amp;dopt=GenBank">http://www.ncbi.nlm.nih.gov/80/entrez/query.fcgi?cmd=Retrieve&amp;db=nucleotide&amp;list_uids=340805&amp;dopt=GenBank</a>     |  |
| 755 | M36941   | C-hordein                                                | Hordeum vulgare | C-horden |      |           | 2065  | <a href="http://www.ncbi.nlm.nih.gov/80/entrez/query.fcgi?cmd=Retrieve&amp;db=nucleotide&amp;list_uids=167062&amp;dopt=GenBank">http://www.ncbi.nlm.nih.gov/80/entrez/query.fcgi?cmd=Retrieve&amp;db=nucleotide&amp;list_uids=167062&amp;dopt=GenBank</a>     |  |
| 756 | M60175   | ubiquitin (mub1)                                         | Hordeum vulgare | 559      |      | 559 460   | 1815  | <a href="http://www.ncbi.nlm.nih.gov/80/entrez/query.fcgi?cmd=Retrieve&amp;db=nucleotide&amp;list_uids=167072&amp;dopt=GenBank">http://www.ncbi.nlm.nih.gov/80/entrez/query.fcgi?cmd=Retrieve&amp;db=nucleotide&amp;list_uids=167072&amp;dopt=GenBank</a>     |  |
| 757 | M60176   | ubiquitin (mub2)                                         | Hordeum vulgare | 750      |      | 750 653   | 1730  | <a href="http://www.ncbi.nlm.nih.gov/80/entrez/query.fcgi?cmd=Retrieve&amp;db=nucleotide&amp;list_uids=167074&amp;dopt=GenBank">http://www.ncbi.nlm.nih.gov/80/entrez/query.fcgi?cmd=Retrieve&amp;db=nucleotide&amp;list_uids=167074&amp;dopt=GenBank</a>     |  |
| 758 | M83671   | peroxidase BP 2A (Prx6)                                  | Hordeum vulgare | 796      | 796  | 705       | 2660  | <a href="http://www.ncbi.nlm.nih.gov/80/entrez/query.fcgi?cmd=Retrieve&amp;db=nucleotide&amp;list_uids=167082&amp;dopt=GenBank">http://www.ncbi.nlm.nih.gov/80/entrez/query.fcgi?cmd=Retrieve&amp;db=nucleotide&amp;list_uids=167082&amp;dopt=GenBank</a>     |  |
| 759 | M55449   | rubisco activase s                                       | Hordeum vulgare | 300      | 544  | 300 267   | 8766  | <a href="http://www.ncbi.nlm.nih.gov/80/entrez/query.fcgi?cmd=Retrieve&amp;db=nucleotide&amp;list_uids=167094&amp;dopt=GenBank">http://www.ncbi.nlm.nih.gov/80/entrez/query.fcgi?cmd=Retrieve&amp;db=nucleotide&amp;list_uids=167094&amp;dopt=GenBank</a>     |  |

|                |                                                             |                 |      |      |      |      |      |                                                                                                                                                                                                                                                         |
|----------------|-------------------------------------------------------------|-----------------|------|------|------|------|------|---------------------------------------------------------------------------------------------------------------------------------------------------------------------------------------------------------------------------------------------------------|
| 760 L23524     | DNA sequence with open reading frame                        | Hordeum vulgare |      |      |      | 181  | 830  | <a href="http://www.ncbi.nlm.nih.gov/entrez/query.fcgi?cmd=Retrieve&amp;db=nucleotide&amp;list_uids=3879011&amp;dopt=GenBank">http://www.ncbi.nlm.nih.gov/entrez/query.fcgi?cmd=Retrieve&amp;db=nucleotide&amp;list_uids=3879011&amp;dopt=GenBank</a>   |
| 761 M7475      | seed imbibition protein (Sip1)                              | Hordeum vulgare | 783  | 1027 | 783  |      | 4788 | <a href="http://www.ncbi.nlm.nih.gov/entrez/query.fcgi?cmd=Retrieve&amp;db=nucleotide&amp;list_uids=1670994&amp;dopt=GenBank">http://www.ncbi.nlm.nih.gov/entrez/query.fcgi?cmd=Retrieve&amp;db=nucleotide&amp;list_uids=1670994&amp;dopt=GenBank</a>   |
| 762 U02287     | chitinase                                                   | Hordeum vulgare | 600  | 600  | 503  |      | 1684 | <a href="http://www.ncbi.nlm.nih.gov/entrez/query.fcgi?cmd=Retrieve&amp;db=nucleotide&amp;list_uids=495304&amp;dopt=GenBank">http://www.ncbi.nlm.nih.gov/entrez/query.fcgi?cmd=Retrieve&amp;db=nucleotide&amp;list_uids=495304&amp;dopt=GenBank</a>     |
| 763 U19359     | cysteine proteinase EPB1                                    | Hordeum vulgare | 922  | 1040 | 922  | 888  | 2880 | <a href="http://www.ncbi.nlm.nih.gov/entrez/query.fcgi?cmd=Retrieve&amp;db=nucleotide&amp;list_uids=1146115&amp;dopt=GenBank">http://www.ncbi.nlm.nih.gov/entrez/query.fcgi?cmd=Retrieve&amp;db=nucleotide&amp;list_uids=1146115&amp;dopt=GenBank</a>   |
| 764 U19384     | cysteine proteinase EPB2                                    | Hordeum vulgare | 727  | 845  | 727  | 693  | 2714 | <a href="http://www.ncbi.nlm.nih.gov/entrez/query.fcgi?cmd=Retrieve&amp;db=nucleotide&amp;list_uids=1146117&amp;dopt=GenBank">http://www.ncbi.nlm.nih.gov/entrez/query.fcgi?cmd=Retrieve&amp;db=nucleotide&amp;list_uids=1146117&amp;dopt=GenBank</a>   |
| 765 U26916     | protoporphyrin IX Mg-chelatase subunit precursor (Xantha-f) | Hordeum vulgare | 902  | 902  |      | 844  | 6364 | <a href="http://www.ncbi.nlm.nih.gov/entrez/query.fcgi?cmd=Retrieve&amp;db=nucleotide&amp;list_uids=861198&amp;dopt=GenBank">http://www.ncbi.nlm.nih.gov/entrez/query.fcgi?cmd=Retrieve&amp;db=nucleotide&amp;list_uids=861198&amp;dopt=GenBank</a>     |
| 766 U47640     | tetrameric alpha-amylase inhibitor subunit Cnd3             | Hordeum vulgare | 712  | 712  |      |      | 1227 | <a href="http://www.ncbi.nlm.nih.gov/entrez/query.fcgi?cmd=Retrieve&amp;db=nucleotide&amp;list_uids=2264391&amp;dopt=GenBank">http://www.ncbi.nlm.nih.gov/entrez/query.fcgi?cmd=Retrieve&amp;db=nucleotide&amp;list_uids=2264391&amp;dopt=GenBank</a>   |
| 767 U47641     | tetrameric alpha-amylase inhibitor subunit Cnd2             | Hordeum vulgare | 712  | 712  |      |      | 1227 | <a href="http://www.ncbi.nlm.nih.gov/entrez/query.fcgi?cmd=Retrieve&amp;db=nucleotide&amp;list_uids=2264393&amp;dopt=GenBank">http://www.ncbi.nlm.nih.gov/entrez/query.fcgi?cmd=Retrieve&amp;db=nucleotide&amp;list_uids=2264393&amp;dopt=GenBank</a>   |
| 768 U54767     | caffeic acid O-methyltransferase (HvCOMT)                   | Hordeum vulgare | 2604 | 2690 | 2604 | 2586 | 5238 | <a href="http://www.ncbi.nlm.nih.gov/entrez/query.fcgi?cmd=Retrieve&amp;db=nucleotide&amp;list_uids=1314741&amp;dopt=GenBank">http://www.ncbi.nlm.nih.gov/entrez/query.fcgi?cmd=Retrieve&amp;db=nucleotide&amp;list_uids=1314741&amp;dopt=GenBank</a>   |
| 769 U63993     | lipid transfer protein (bit4.9)                             | Hordeum vulgare | 2061 | 2061 |      |      | 3238 | <a href="http://www.ncbi.nlm.nih.gov/entrez/query.fcgi?cmd=Retrieve&amp;db=nucleotide&amp;list_uids=1480925&amp;dopt=GenBank">http://www.ncbi.nlm.nih.gov/entrez/query.fcgi?cmd=Retrieve&amp;db=nucleotide&amp;list_uids=1480925&amp;dopt=GenBank</a>   |
| 770 U73173     | BARE-1 retrotransposon related-sequence                     | Hordeum vulgare | 222  | 222  |      |      | 4198 | <a href="http://www.ncbi.nlm.nih.gov/entrez/query.fcgi?cmd=Retrieve&amp;db=nucleotide&amp;list_uids=1657812&amp;dopt=GenBank">http://www.ncbi.nlm.nih.gov/entrez/query.fcgi?cmd=Retrieve&amp;db=nucleotide&amp;list_uids=1657812&amp;dopt=GenBank</a>   |
| 771 U73749     | xylan endohydrolase isoenzyme X-I                           | Hordeum vulgare | 1045 | 1045 |      | 444  | 2704 | <a href="http://www.ncbi.nlm.nih.gov/entrez/query.fcgi?cmd=Retrieve&amp;db=nucleotide&amp;list_uids=1813594&amp;dopt=GenBank">http://www.ncbi.nlm.nih.gov/entrez/query.fcgi?cmd=Retrieve&amp;db=nucleotide&amp;list_uids=1813594&amp;dopt=GenBank</a>   |
| 772 U76261     | highly repeated, retrotransposon-like sequence              | Hordeum vulgare | 3604 | 3604 |      |      | 5050 | <a href="http://www.ncbi.nlm.nih.gov/entrez/query.fcgi?cmd=Retrieve&amp;db=nucleotide&amp;list_uids=1666235&amp;dopt=GenBank">http://www.ncbi.nlm.nih.gov/entrez/query.fcgi?cmd=Retrieve&amp;db=nucleotide&amp;list_uids=1666235&amp;dopt=GenBank</a>   |
| 773 U83904     | lipoxigenase isoenzyme 1 (Lox:Hv1)                          | Hordeum vulgare | 3512 | 3512 | 3444 | 3370 | 5236 | <a href="http://www.ncbi.nlm.nih.gov/entrez/query.fcgi?cmd=Retrieve&amp;db=nucleotide&amp;list_uids=1814015&amp;dopt=GenBank">http://www.ncbi.nlm.nih.gov/entrez/query.fcgi?cmd=Retrieve&amp;db=nucleotide&amp;list_uids=1814015&amp;dopt=GenBank</a>   |
| 774 U87149     | nucellin                                                    | Hordeum vulgare | 1227 | 1281 | 1227 |      | 3686 | <a href="http://www.ncbi.nlm.nih.gov/entrez/query.fcgi?cmd=Retrieve&amp;db=nucleotide&amp;list_uids=2290203&amp;dopt=GenBank">http://www.ncbi.nlm.nih.gov/entrez/query.fcgi?cmd=Retrieve&amp;db=nucleotide&amp;list_uids=2290203&amp;dopt=GenBank</a>   |
| 775 U96096     | endo-1,3-beta-glucanase (Hv34)                              | Hordeum vulgare | 1706 | 1706 |      |      | 2899 | <a href="http://www.ncbi.nlm.nih.gov/entrez/query.fcgi?cmd=Retrieve&amp;db=nucleotide&amp;list_uids=2735501&amp;dopt=GenBank">http://www.ncbi.nlm.nih.gov/entrez/query.fcgi?cmd=Retrieve&amp;db=nucleotide&amp;list_uids=2735501&amp;dopt=GenBank</a>   |
| 776 S53707     | B22EL8 (B22EL8)                                             | Hordeum vulgare | 123  | 123  |      |      | 1071 | <a href="http://www.ncbi.nlm.nih.gov/entrez/query.fcgi?cmd=Retrieve&amp;db=nucleotide&amp;list_uids=234814&amp;dopt=GenBank">http://www.ncbi.nlm.nih.gov/entrez/query.fcgi?cmd=Retrieve&amp;db=nucleotide&amp;list_uids=234814&amp;dopt=GenBank</a>     |
| 777 S66938     | C-hordein                                                   | Hordeum vulgare | 1084 | 1084 |      |      | 2806 | <a href="http://www.ncbi.nlm.nih.gov/entrez/query.fcgi?cmd=Retrieve&amp;db=nucleotide&amp;list_uids=442523&amp;dopt=GenBank">http://www.ncbi.nlm.nih.gov/entrez/query.fcgi?cmd=Retrieve&amp;db=nucleotide&amp;list_uids=442523&amp;dopt=GenBank</a>     |
| 778 S69616     | dihydroflavonol-4-reductase (Ant18)                         | Hordeum vulgare | 1340 | 1340 |      |      | 3193 | <a href="http://www.ncbi.nlm.nih.gov/entrez/query.fcgi?cmd=Retrieve&amp;db=nucleotide&amp;list_uids=240051&amp;dopt=GenBank">http://www.ncbi.nlm.nih.gov/entrez/query.fcgi?cmd=Retrieve&amp;db=nucleotide&amp;list_uids=240051&amp;dopt=GenBank</a>     |
| 779 ST0738     | stem rust resistance gene Rpg1                              | Hordeum vulgare | 149  | 149  |      |      | 676  | <a href="http://www.ncbi.nlm.nih.gov/entrez/query.fcgi?cmd=Retrieve&amp;db=nucleotide&amp;list_uids=547194&amp;dopt=GenBank">http://www.ncbi.nlm.nih.gov/entrez/query.fcgi?cmd=Retrieve&amp;db=nucleotide&amp;list_uids=547194&amp;dopt=GenBank</a>     |
| 780 AF182523.1 | Alpha1-tubulin                                              | Oryza sativa    | 1046 |      |      |      |      | <a href="http://www.ncbi.nlm.nih.gov/entrez/query.fcgi?cmd=Retrieve&amp;db=nucleotide&amp;list_uids=10441015&amp;dopt=GenBank">http://www.ncbi.nlm.nih.gov/entrez/query.fcgi?cmd=Retrieve&amp;db=nucleotide&amp;list_uids=10441015&amp;dopt=GenBank</a> |
| 781 AF182523.1 | Alpha2-tubulin                                              | Oryza sativa    | 1046 |      |      |      |      | <a href="http://www.ncbi.nlm.nih.gov/entrez/query.fcgi?cmd=Retrieve&amp;db=nucleotide&amp;list_uids=10441016&amp;dopt=GenBank">http://www.ncbi.nlm.nih.gov/entrez/query.fcgi?cmd=Retrieve&amp;db=nucleotide&amp;list_uids=10441016&amp;dopt=GenBank</a> |
| 782 AF182523.1 | Alpha-3-tubulin                                             | Oryza sativa    | 1046 |      |      |      |      | <a href="http://www.ncbi.nlm.nih.gov/entrez/query.fcgi?cmd=Retrieve&amp;db=nucleotide&amp;list_uids=10441015&amp;dopt=GenBank">http://www.ncbi.nlm.nih.gov/entrez/query.fcgi?cmd=Retrieve&amp;db=nucleotide&amp;list_uids=10441015&amp;dopt=GenBank</a> |
| 783 L29469.1   | Cylophilin.                                                 | Oryza sativa    | 1150 |      |      |      |      | <a href="http://www.ncbi.nlm.nih.gov/entrez/query.fcgi?cmd=Retrieve&amp;db=nucleotide&amp;list_uids=600766&amp;dopt=GenBank">http://www.ncbi.nlm.nih.gov/entrez/query.fcgi?cmd=Retrieve&amp;db=nucleotide&amp;list_uids=600766&amp;dopt=GenBank</a>     |
| 784 D31843.1   | H(+) -transporting ATPase (Mha1)                            | Oryza sativa    | 131  |      |      |      |      | <a href="http://www.ncbi.nlm.nih.gov/entrez/query.fcgi?cmd=Retrieve&amp;db=nucleotide&amp;list_uids=633109&amp;dopt=GenBank">http://www.ncbi.nlm.nih.gov/entrez/query.fcgi?cmd=Retrieve&amp;db=nucleotide&amp;list_uids=633109&amp;dopt=GenBank</a>     |
| 785 AB026295.2 | Histone H3 (H3C4)                                           | Oryza sativa    | 549  |      |      |      |      | <a href="http://www.ncbi.nlm.nih.gov/entrez/query.fcgi?cmd=Retrieve&amp;db=nucleotide&amp;list_uids=5295936&amp;dopt=GenBank">http://www.ncbi.nlm.nih.gov/entrez/query.fcgi?cmd=Retrieve&amp;db=nucleotide&amp;list_uids=5295936&amp;dopt=GenBank</a>   |
| 786 AC073166.7 | Histone H4 (H4C14)                                          | Oryza sativa    | 8318 |      |      |      |      | <a href="http://www.ncbi.nlm.nih.gov/entrez/query.fcgi?cmd=Retrieve&amp;db=nucleotide&amp;list_uids=1203931&amp;dopt=GenBank">http://www.ncbi.nlm.nih.gov/entrez/query.fcgi?cmd=Retrieve&amp;db=nucleotide&amp;list_uids=1203931&amp;dopt=GenBank</a>   |
| 787 D16685     | Lactate dehydrogenase.                                      | Oryza sativa    | 2502 |      |      |      |      | <a href="http://www.ncbi.nlm.nih.gov/entrez/query.fcgi?cmd=Retrieve&amp;db=nucleotide&amp;list_uids=987692&amp;dopt=GenBank">http://www.ncbi.nlm.nih.gov/entrez/query.fcgi?cmd=Retrieve&amp;db=nucleotide&amp;list_uids=987692&amp;dopt=GenBank</a>     |
| 788 AP003047   | Mus2 for DNA mismatch repair                                | Oryza sativa    | 1312 |      |      |      |      | <a href="http://www.ncbi.nlm.nih.gov/entrez/query.fcgi?cmd=Retrieve&amp;db=nucleotide&amp;list_uids=13122417&amp;dopt=GenBank">http://www.ncbi.nlm.nih.gov/entrez/query.fcgi?cmd=Retrieve&amp;db=nucleotide&amp;list_uids=13122417&amp;dopt=GenBank</a> |
| 789 AF294427   | PCNA mRNA for proliferating cell nuclear antigen.           | Oryza sativa    | 1973 |      |      |      |      | <a href="http://www.ncbi.nlm.nih.gov/entrez/query.fcgi?cmd=Retrieve&amp;db=nucleotide&amp;list_uids=9965403&amp;dopt=GenBank">http://www.ncbi.nlm.nih.gov/entrez/query.fcgi?cmd=Retrieve&amp;db=nucleotide&amp;list_uids=9965403&amp;dopt=GenBank</a>   |
| 790 U26660     | Pdc mRNA for pyruvate decarboxylase.                        | Oryza sativa    | 1324 |      |      |      |      | <a href="http://www.ncbi.nlm.nih.gov/entrez/query.fcgi?cmd=Retrieve&amp;db=nucleotide&amp;list_uids=1098558&amp;dopt=GenBank">http://www.ncbi.nlm.nih.gov/entrez/query.fcgi?cmd=Retrieve&amp;db=nucleotide&amp;list_uids=1098558&amp;dopt=GenBank</a>   |
| 791 AP003411   | Phosphoglycerate mutase                                     | Oryza sativa    | 639  |      |      |      |      | <a href="http://www.ncbi.nlm.nih.gov/entrez/query.fcgi?cmd=Retrieve&amp;db=nucleotide&amp;list_uids=1552877&amp;dopt=GenBank">http://www.ncbi.nlm.nih.gov/entrez/query.fcgi?cmd=Retrieve&amp;db=nucleotide&amp;list_uids=1552877&amp;dopt=GenBank</a>   |
| 792 AP003725   | polyubiquitin (Ubiquitin 1)                                 | Oryza sativa    | 2496 |      |      |      |      | <a href="http://www.ncbi.nlm.nih.gov/entrez/query.fcgi?cmd=Retrieve&amp;db=nucleotide&amp;list_uids=20161534&amp;dopt=GenBank">http://www.ncbi.nlm.nih.gov/entrez/query.fcgi?cmd=Retrieve&amp;db=nucleotide&amp;list_uids=20161534&amp;dopt=GenBank</a> |
| 793 AF184279   | polyubiquitin2                                              | Oryza sativa    | 839  |      |      |      |      | <a href="http://www.ncbi.nlm.nih.gov/entrez/query.fcgi?cmd=Retrieve&amp;db=nucleotide&amp;list_uids=6013288&amp;dopt=GenBank">http://www.ncbi.nlm.nih.gov/entrez/query.fcgi?cmd=Retrieve&amp;db=nucleotide&amp;list_uids=6013288&amp;dopt=GenBank</a>   |
| 794 AF474922   | tubulinA5                                                   | Oryza sativa    | 930  |      |      |      |      | <a href="http://www.ncbi.nlm.nih.gov/entrez/query.fcgi?cmd=Retrieve&amp;db=nucleotide&amp;list_uids=2015298&amp;dopt=GenBank">http://www.ncbi.nlm.nih.gov/entrez/query.fcgi?cmd=Retrieve&amp;db=nucleotide&amp;list_uids=2015298&amp;dopt=GenBank</a>   |
| 795 D86611     | tubulinA6                                                   | Oryza sativa    | 1179 |      |      |      |      | <a href="http://www.ncbi.nlm.nih.gov/entrez/query.fcgi?cmd=Retrieve&amp;db=nucleotide&amp;list_uids=3868755&amp;dopt=GenBank">http://www.ncbi.nlm.nih.gov/entrez/query.fcgi?cmd=Retrieve&amp;db=nucleotide&amp;list_uids=3868755&amp;dopt=GenBank</a>   |
| 796 AP002971   | Ubiquitin fusion protein (UBF9)                             | Oryza sativa    | 1466 |      |      |      |      | <a href="http://www.ncbi.nlm.nih.gov/entrez/query.fcgi?cmd=Retrieve&amp;db=nucleotide&amp;list_uids=13365995&amp;dopt=GenBank">http://www.ncbi.nlm.nih.gov/entrez/query.fcgi?cmd=Retrieve&amp;db=nucleotide&amp;list_uids=13365995&amp;dopt=GenBank</a> |
| 797 AF162665   | chlorophyll a/b binding protein (cab1)                      | Oryza sativa    | 188  |      |      |      |      | <a href="http://www.ncbi.nlm.nih.gov/entrez/query.fcgi?cmd=Retrieve&amp;db=nucleotide&amp;list_uids=8163729&amp;dopt=GenBank">http://www.ncbi.nlm.nih.gov/entrez/query.fcgi?cmd=Retrieve&amp;db=nucleotide&amp;list_uids=8163729&amp;dopt=GenBank</a>   |
| 798 C74075     | cytpdkZm1=orthophosphate dikinase                           | Oryza sativa    |      |      |      |      |      | <a href="http://www.ncbi.nlm.nih.gov/entrez/query.fcgi?cmd=Retrieve&amp;db=nucleotide&amp;list_uids=15072262&amp;dopt=GenBank">http://www.ncbi.nlm.nih.gov/entrez/query.fcgi?cmd=Retrieve&amp;db=nucleotide&amp;list_uids=15072262&amp;dopt=GenBank</a> |
| 799 D30794     | Ferredoxin VI                                               | Oryza sativa    | 1128 |      |      |      |      | <a href="http://www.ncbi.nlm.nih.gov/entrez/query.fcgi?cmd=Retrieve&amp;db=nucleotide&amp;list_uids=505135&amp;dopt=GenBank">http://www.ncbi.nlm.nih.gov/entrez/query.fcgi?cmd=Retrieve&amp;db=nucleotide&amp;list_uids=505135&amp;dopt=GenBank</a>     |
| 800 X91806     | Ferredoxin-NADP reductase                                   | Oryza sativa    | 114  |      |      |      |      | <a href="http://www.ncbi.nlm.nih.gov/entrez/query.fcgi?cmd=Retrieve&amp;db=nucleotide&amp;list_uids=1136119&amp;dopt=GenBank">http://www.ncbi.nlm.nih.gov/entrez/query.fcgi?cmd=Retrieve&amp;db=nucleotide&amp;list_uids=1136119&amp;dopt=GenBank</a>   |
| 801 AP003052   | Phosphoenolpyruvate carboxylase (PEPC1)                     | Oryza sativa    | 1825 |      |      |      |      | <a href="http://www.ncbi.nlm.nih.gov/entrez/query.fcgi?cmd=Retrieve&amp;db=nucleotide&amp;list_uids=11967924&amp;dopt=GenBank">http://www.ncbi.nlm.nih.gov/entrez/query.fcgi?cmd=Retrieve&amp;db=nucleotide&amp;list_uids=11967924&amp;dopt=GenBank</a> |
| 802 AF271995   | Phosphoenolpyruvate carboxylase (pepcZm1)                   | Oryza sativa    | 188  |      |      |      |      | <a href="http://www.ncbi.nlm.nih.gov/entrez/query.fcgi?cmd=Retrieve&amp;db=nucleotide&amp;list_uids=9828444&amp;dopt=GenBank">http://www.ncbi.nlm.nih.gov/entrez/query.fcgi?cmd=Retrieve&amp;db=nucleotide&amp;list_uids=9828444&amp;dopt=GenBank</a>   |
| 803 AF271995   | Phosphoenolpyruvate carboxylase (pepcZm2A)                  | Oryza sativa    | 188  |      |      |      |      | <a href="http://www.ncbi.nlm.nih.gov/entrez/query.fcgi?cmd=Retrieve&amp;db=nucleotide&amp;list_uids=9828444&amp;dopt=GenBank">http://www.ncbi.nlm.nih.gov/entrez/query.fcgi?cmd=Retrieve&amp;db=nucleotide&amp;list_uids=9828444&amp;dopt=GenBank</a>   |
| 804 X07515     | ribulose-1, 5-bisphosphate carboxylase small subunit (rbcS) | Oryza sativa    | 260  |      |      |      |      | <a href="http://www.ncbi.nlm.nih.gov/entrez/query.fcgi?cmd=Retrieve&amp;db=nucleotide&amp;list_uids=20340&amp;dopt=GenBank">http://www.ncbi.nlm.nih.gov/entrez/query.fcgi?cmd=Retrieve&amp;db=nucleotide&amp;list_uids=20340&amp;dopt=GenBank</a>       |
| 805 AB007404   | Alanine aminotransferase                                    | Oryza sativa    | 1789 |      |      |      |      | <a href="http://www.ncbi.nlm.nih.gov/entrez/query.fcgi?cmd=Retrieve&amp;db=nucleotide&amp;list_uids=4730883&amp;dopt=GenBank">http://www.ncbi.nlm.nih.gov/entrez/query.fcgi?cmd=Retrieve&amp;db=nucleotide&amp;list_uids=4730883&amp;dopt=GenBank</a>   |
| 806 X15820     | Nitrate reductase1                                          | Oryza sativa    | 288  |      |      |      |      | <a href="http://www.ncbi.nlm.nih.gov/entrez/query.fcgi?cmd=Retrieve&amp;db=nucleotide&amp;list_uids=20273&amp;dopt=GenBank">http://www.ncbi.nlm.nih.gov/entrez/query.fcgi?cmd=Retrieve&amp;db=nucleotide&amp;list_uids=20273&amp;dopt=GenBank</a>       |
| 807 AL731599   | acetoaldehyde synthase gene AHAS 108                        | Oryza sativa    | 2000 |      |      |      |      | <a href="http://www.ncbi.nlm.nih.gov/entrez/query.fcgi?cmd=Retrieve&amp;db=nucleotide&amp;list_uids=20451708&amp;dopt=GenBank">http://www.ncbi.nlm.nih.gov/entrez/query.fcgi?cmd=Retrieve&amp;db=nucleotide&amp;list_uids=20451708&amp;dopt=GenBank</a> |
| 808 AF172282   | Alcohol dehydrogenase1 (Adh1-1S)                            | Oryza sativa    | 1954 |      |      |      |      | <a href="http://www.ncbi.nlm.nih.gov/entrez/query.fcgi?cmd=Retrieve&amp;db=nucleotide&amp;list_uids=6979318&amp;dopt=GenBank">http://www.ncbi.nlm.nih.gov/entrez/query.fcgi?cmd=Retrieve&amp;db=nucleotide&amp;list_uids=6979318&amp;dopt=GenBank</a>   |
| 809 AF172282   | Alcohol dehydrogenase2 (Adh2)                               | Oryza sativa    | 5630 |      |      |      |      | <a href="http://www.ncbi.nlm.nih.gov/entrez/query.fcgi?cmd=Retrieve&amp;db=nucleotide&amp;list_uids=6979318&amp;dopt=GenBank">http://www.ncbi.nlm.nih.gov/entrez/query.fcgi?cmd=Retrieve&amp;db=nucleotide&amp;list_uids=6979318&amp;dopt=GenBank</a>   |
| 810 AC084766   | stenility                                                   | Oryza sativa    | 8852 |      |      |      |      | <a href="http://www.ncbi.nlm.nih.gov/entrez/query.fcgi?cmd=Retrieve&amp;db=nucleotide&amp;list_uids=18640658&amp;dopt=GenBank">http://www.ncbi.nlm.nih.gov/entrez/query.fcgi?cmd=Retrieve&amp;db=nucleotide&amp;list_uids=18640658&amp;dopt=GenBank</a> |
| 811 AF462029   | aldehyde dehydrogenase rf2B                                 | Oryza sativa    | 6576 |      |      |      |      | <a href="http://www.ncbi.nlm.nih.gov/entrez/query.fcgi?cmd=Retrieve&amp;db=nucleotide&amp;list_uids=18653395&amp;dopt=GenBank">http://www.ncbi.nlm.nih.gov/entrez/query.fcgi?cmd=Retrieve&amp;db=nucleotide&amp;list_uids=18653395&amp;dopt=GenBank</a> |
| 812 AP003199   | Anthocyanin (A2)                                            | Oryza sativa    | 1578 |      |      |      |      | <a href="http://www.ncbi.nlm.nih.gov/entrez/query.fcgi?cmd=Retrieve&amp;db=nucleotide&amp;list_uids=14587202&amp;dopt=GenBank">http://www.ncbi.nlm.nih.gov/entrez/query.fcgi?cmd=Retrieve&amp;db=nucleotide&amp;list_uids=14587202&amp;dopt=GenBank</a> |
| 813 AC092749   | Bronze-2 glutathione-S-transferase                          | Oryza sativa    | 1951 |      |      |      |      | <a href="http://www.ncbi.nlm.nih.gov/entrez/query.fcgi?cmd=Retrieve&amp;db=nucleotide&amp;list_uids=15721940&amp;dopt=GenBank">http://www.ncbi.nlm.nih.gov/entrez/query.fcgi?cmd=Retrieve&amp;db=nucleotide&amp;list_uids=15721940&amp;dopt=GenBank</a> |
| 814 D64013     | Catalase1 (Cat1)                                            | Oryza sativa    | 1073 |      |      |      |      | <a href="http://www.ncbi.nlm.nih.gov/entrez/query.fcgi?cmd=Retrieve&amp;db=nucleotide&amp;list_uids=3868753&amp;dopt=GenBank">http://www.ncbi.nlm.nih.gov/entrez/query.fcgi?cmd=Retrieve&amp;db=nucleotide&amp;list_uids=3868753&amp;dopt=GenBank</a>   |
| 815 AF162665   | catalase2 (Cat2)                                            | Oryza sativa    | 188  |      |      |      |      | <a href="http://www.ncbi.nlm.nih.gov/entrez/query.fcgi?cmd=Retrieve&amp;db=nucleotide&amp;list_uids=8163729&amp;dopt=GenBank">http://www.ncbi.nlm.nih.gov/entrez/query.fcgi?cmd=Retrieve&amp;db=nucleotide&amp;list_uids=8163729&amp;dopt=GenBank</a>   |
| 816 D29966     | Catalase (Cat3)                                             | Oryza sativa    | 1560 |      |      |      |      | <a href="http://www.ncbi.nlm.nih.gov/entrez/query.fcgi?cmd=Retrieve&amp;db=nucleotide&amp;list_uids=1261857&amp;dopt=GenBank">http://www.ncbi.nlm.nih.gov/entrez/query.fcgi?cmd=Retrieve&amp;db=nucleotide&amp;list_uids=1261857&amp;dopt=GenBank</a>   |
| 817 AC087723   | Chalcone synthase (C2)                                      | Oryza sativa    | 1639 |      |      |      |      | <a href="http://www.ncbi.nlm.nih.gov/entrez/query.fcgi?cmd=Retrieve&amp;db=nucleotide&amp;list_uids=15281152&amp;dopt=GenBank">http://www.ncbi.nlm.nih.gov/entrez/query.fcgi?cmd=Retrieve&amp;db=nucleotide&amp;list_uids=15281152&amp;dopt=GenBank</a> |
| 818 AP003380   | chalcone synthase, white pollen locus (CHS)                 | Oryza sativa    | 5828 |      |      |      |      | <a href="http://www.ncbi.nlm.nih.gov/entrez/query.fcgi?cmd=Retrieve&amp;db=nucleotide&amp;list_uids=19773506&amp;dopt=GenBank">http://www.ncbi.nlm.nih.gov/entrez/query.fcgi?cmd=Retrieve&amp;db=nucleotide&amp;list_uids=19773506&amp;dopt=GenBank</a> |

|     |               |                                                        |                 |       |      |      |      |      |                                                                                                                                                                                                                                                           |
|-----|---------------|--------------------------------------------------------|-----------------|-------|------|------|------|------|-----------------------------------------------------------------------------------------------------------------------------------------------------------------------------------------------------------------------------------------------------------|
| 819 | U38199        | cystathionine gamma-synthase                           | Oryza sativa    | 2242  |      |      |      |      | <a href="http://www.ncbi.nlm.nih.gov/entrez/query.fcgi?cmd=Retrieve&amp;db=nucleotide&amp;list_uids=1777454&amp;dopt=GenBank">http://www.ncbi.nlm.nih.gov/entrez/query.fcgi?cmd=Retrieve&amp;db=nucleotide&amp;list_uids=1777454&amp;dopt=GenBank</a>     |
| 820 | M29259        | Cysteine proteinase inhibitor                          | Oryza sativa    | 539   |      |      |      |      | <a href="http://www.ncbi.nlm.nih.gov/entrez/query.fcgi?cmd=Retrieve&amp;db=nucleotide&amp;list_uids=169806&amp;dopt=GenBank">http://www.ncbi.nlm.nih.gov/entrez/query.fcgi?cmd=Retrieve&amp;db=nucleotide&amp;list_uids=169806&amp;dopt=GenBank</a>       |
| 821 | AP003106      | Exoglucanase precursor (exg1)                          | Oryza sativa    | 751   |      |      |      |      | <a href="http://www.ncbi.nlm.nih.gov/entrez/query.fcgi?cmd=Retrieve&amp;db=nucleotide&amp;list_uids=12313696&amp;dopt=GenBank">http://www.ncbi.nlm.nih.gov/entrez/query.fcgi?cmd=Retrieve&amp;db=nucleotide&amp;list_uids=12313696&amp;dopt=GenBank</a>   |
| 822 | AF432915      | heat shock protein 70                                  | Oryza sativa    | 1328  |      |      |      |      | <a href="http://www.ncbi.nlm.nih.gov/entrez/query.fcgi?cmd=Retrieve&amp;db=nucleotide&amp;list_uids=17646327&amp;dopt=GenBank">http://www.ncbi.nlm.nih.gov/entrez/query.fcgi?cmd=Retrieve&amp;db=nucleotide&amp;list_uids=17646327&amp;dopt=GenBank</a>   |
| 823 | Z11920        | Heat shock protein HSP82                               | Oryza sativa    | 927   |      |      |      |      | <a href="http://www.ncbi.nlm.nih.gov/entrez/query.fcgi?cmd=Retrieve&amp;db=nucleotide&amp;list_uids=20255&amp;dopt=GenBank">http://www.ncbi.nlm.nih.gov/entrez/query.fcgi?cmd=Retrieve&amp;db=nucleotide&amp;list_uids=20255&amp;dopt=GenBank</a>         |
| 824 | X61280        | Hydroxy-rice glycoprotein (HRGP)                       | Oryza sativa    | 1060  |      |      |      |      | <a href="http://www.ncbi.nlm.nih.gov/entrez/query.fcgi?cmd=Retrieve&amp;db=nucleotide&amp;list_uids=433815&amp;dopt=GenBank">http://www.ncbi.nlm.nih.gov/entrez/query.fcgi?cmd=Retrieve&amp;db=nucleotide&amp;list_uids=433815&amp;dopt=GenBank</a>       |
| 825 | AF019212      | L2 oleosin KD18                                        | Oryza sativa    | 1257  |      |      |      |      | <a href="http://www.ncbi.nlm.nih.gov/entrez/query.fcgi?cmd=Retrieve&amp;db=nucleotide&amp;list_uids=2735839&amp;dopt=GenBank">http://www.ncbi.nlm.nih.gov/entrez/query.fcgi?cmd=Retrieve&amp;db=nucleotide&amp;list_uids=2735839&amp;dopt=GenBank</a>     |
| 826 | U46159        | metallothionein-like gene                              | Oryza sativa    | 1849  |      |      |      |      | <a href="http://www.ncbi.nlm.nih.gov/entrez/query.fcgi?cmd=Retrieve&amp;db=nucleotide&amp;list_uids=4097153&amp;dopt=GenBank">http://www.ncbi.nlm.nih.gov/entrez/query.fcgi?cmd=Retrieve&amp;db=nucleotide&amp;list_uids=4097153&amp;dopt=GenBank</a>     |
| 827 | U70541        | NADPH-dependent reductase (A1)                         | Oryza sativa    | 3676  |      |      |      |      | <a href="http://www.ncbi.nlm.nih.gov/entrez/query.fcgi?cmd=Retrieve&amp;db=nucleotide&amp;list_uids=2149018&amp;dopt=GenBank">http://www.ncbi.nlm.nih.gov/entrez/query.fcgi?cmd=Retrieve&amp;db=nucleotide&amp;list_uids=2149018&amp;dopt=GenBank</a>     |
| 828 | U43930        | Oleosin (ole16)                                        | Oryza sativa    | 85    |      |      |      |      | <a href="http://www.ncbi.nlm.nih.gov/entrez/query.fcgi?cmd=Retrieve&amp;db=nucleotide&amp;list_uids=1171351&amp;dopt=GenBank">http://www.ncbi.nlm.nih.gov/entrez/query.fcgi?cmd=Retrieve&amp;db=nucleotide&amp;list_uids=1171351&amp;dopt=GenBank</a>     |
| 829 | AP003140      | Polygalacturonase (PG)                                 | Oryza sativa    | 3521  |      |      |      |      | <a href="http://www.ncbi.nlm.nih.gov/entrez/query.fcgi?cmd=Retrieve&amp;db=nucleotide&amp;list_uids=1416491&amp;dopt=GenBank">http://www.ncbi.nlm.nih.gov/entrez/query.fcgi?cmd=Retrieve&amp;db=nucleotide&amp;list_uids=1416491&amp;dopt=GenBank</a>     |
| 830 | AC092388      | putative cytosine-5 DNA methyltransferase ZMET1        | Oryza sativa    | 5828  |      |      |      |      | <a href="http://www.ncbi.nlm.nih.gov/entrez/query.fcgi?cmd=Retrieve&amp;db=nucleotide&amp;list_uids=20279487&amp;dopt=GenBank">http://www.ncbi.nlm.nih.gov/entrez/query.fcgi?cmd=Retrieve&amp;db=nucleotide&amp;list_uids=20279487&amp;dopt=GenBank</a>   |
| 831 | AC122144      | pyruvate decarboxylase3                                | Oryza sativa    | 1598  |      |      |      |      | <a href="http://www.ncbi.nlm.nih.gov/entrez/query.fcgi?cmd=Retrieve&amp;db=nucleotide&amp;list_uids=21104877&amp;dopt=GenBank">http://www.ncbi.nlm.nih.gov/entrez/query.fcgi?cmd=Retrieve&amp;db=nucleotide&amp;list_uids=21104877&amp;dopt=GenBank</a>   |
| 832 | AC092750      | RAB-17                                                 | Oryza sativa    |       |      |      |      |      | <a href="http://www.ncbi.nlm.nih.gov/entrez/query.fcgi?cmd=Retrieve&amp;db=nucleotide&amp;list_uids=16356860&amp;dopt=GenBank">http://www.ncbi.nlm.nih.gov/entrez/query.fcgi?cmd=Retrieve&amp;db=nucleotide&amp;list_uids=16356860&amp;dopt=GenBank</a>   |
| 833 | AC099401      | Rab28                                                  | Oryza sativa    |       |      |      |      |      | <a href="http://www.ncbi.nlm.nih.gov/entrez/query.fcgi?cmd=Retrieve&amp;db=Nucleotide&amp;list_uids=22103&amp;dopt=GenBank">http://www.ncbi.nlm.nih.gov/entrez/query.fcgi?cmd=Retrieve&amp;db=Nucleotide&amp;list_uids=22103&amp;dopt=GenBank</a>         |
| 834 | L19435        | Superoxide dismutase 4 (sod4)                          | Oryza sativa    | 2256  |      |      |      |      | <a href="http://www.ncbi.nlm.nih.gov/entrez/query.fcgi?cmd=Retrieve&amp;db=nucleotide&amp;list_uids=685241&amp;dopt=GenBank">http://www.ncbi.nlm.nih.gov/entrez/query.fcgi?cmd=Retrieve&amp;db=nucleotide&amp;list_uids=685241&amp;dopt=GenBank</a>       |
| 835 | AP003278      | tapetum-specific endoxylanase                          | Oryza sativa    | 662   |      |      |      |      | <a href="http://www.ncbi.nlm.nih.gov/entrez/query.fcgi?cmd=Retrieve&amp;db=nucleotide&amp;list_uids=16904679&amp;dopt=GenBank">http://www.ncbi.nlm.nih.gov/entrez/query.fcgi?cmd=Retrieve&amp;db=nucleotide&amp;list_uids=16904679&amp;dopt=GenBank</a>   |
| 836 | L10345        | Beta-amylase (Amy2)                                    | Oryza sativa    | 655   |      |      |      |      | <a href="http://www.ncbi.nlm.nih.gov/entrez/query.fcgi?cmd=Retrieve&amp;db=nucleotide&amp;list_uids=169776&amp;dopt=GenBank">http://www.ncbi.nlm.nih.gov/entrez/query.fcgi?cmd=Retrieve&amp;db=nucleotide&amp;list_uids=169776&amp;dopt=GenBank</a>       |
| 837 | M31616        | Brittle2 (Bl2)                                         | Oryza sativa    | 753   |      |      |      |      | <a href="http://www.ncbi.nlm.nih.gov/entrez/query.fcgi?cmd=Retrieve&amp;db=nucleotide&amp;list_uids=169760&amp;dopt=GenBank">http://www.ncbi.nlm.nih.gov/entrez/query.fcgi?cmd=Retrieve&amp;db=nucleotide&amp;list_uids=169760&amp;dopt=GenBank</a>       |
| 838 | AF155121      | Cell wall invertase (incw4)                            | Oryza sativa    | 1787  |      |      |      |      | <a href="http://www.ncbi.nlm.nih.gov/entrez/query.fcgi?cmd=Retrieve&amp;db=nucleotide&amp;list_uids=5052006&amp;dopt=GenBank">http://www.ncbi.nlm.nih.gov/entrez/query.fcgi?cmd=Retrieve&amp;db=nucleotide&amp;list_uids=5052006&amp;dopt=GenBank</a>     |
| 839 | X91806        | Dull1-like starch-synthase from patent WO 0112826      | Oryza sativa    | 114   |      |      |      |      | <a href="http://www.ncbi.nlm.nih.gov/entrez/query.fcgi?cmd=Retrieve&amp;db=nucleotide&amp;list_uids=1136119&amp;dopt=GenBank">http://www.ncbi.nlm.nih.gov/entrez/query.fcgi?cmd=Retrieve&amp;db=nucleotide&amp;list_uids=1136119&amp;dopt=GenBank</a>     |
| 840 | AF141954      | Glucose starch glycosyl transferase (Wxy1)             | Oryza sativa    | 3000  |      |      |      |      | <a href="http://www.ncbi.nlm.nih.gov/entrez/query.fcgi?cmd=Retrieve&amp;db=nucleotide&amp;list_uids=8101496&amp;dopt=GenBank">http://www.ncbi.nlm.nih.gov/entrez/query.fcgi?cmd=Retrieve&amp;db=nucleotide&amp;list_uids=8101496&amp;dopt=GenBank</a>     |
| 841 | M31616        | Leaf ADP-GP small subunit                              | Oryza sativa    | 753   |      |      |      |      | <a href="http://www.ncbi.nlm.nih.gov/entrez/query.fcgi?cmd=Retrieve&amp;db=nucleotide&amp;list_uids=169760&amp;dopt=GenBank">http://www.ncbi.nlm.nih.gov/entrez/query.fcgi?cmd=Retrieve&amp;db=nucleotide&amp;list_uids=169760&amp;dopt=GenBank</a>       |
| 842 | AF101045      | Shrunken2 (Sh2)                                        | Oryza sativa    | 1996  |      |      |      |      | <a href="http://www.ncbi.nlm.nih.gov/entrez/query.fcgi?cmd=Retrieve&amp;db=nucleotide&amp;list_uids=6650524&amp;dopt=GenBank">http://www.ncbi.nlm.nih.gov/entrez/query.fcgi?cmd=Retrieve&amp;db=nucleotide&amp;list_uids=6650524&amp;dopt=GenBank</a>     |
| 843 | D10838        | Starch branching enzyme I (Sbe1)                       | Oryza sativa    | 1688  |      |      |      |      | <a href="http://www.ncbi.nlm.nih.gov/entrez/query.fcgi?cmd=Retrieve&amp;db=nucleotide&amp;list_uids=287403&amp;dopt=GenBank">http://www.ncbi.nlm.nih.gov/entrez/query.fcgi?cmd=Retrieve&amp;db=nucleotide&amp;list_uids=287403&amp;dopt=GenBank</a>       |
| 844 | AB023498      | Starch branching enzyme2a (Sbe2a)                      | Oryza sativa    |       |      |      |      |      | <a href="http://www.ncbi.nlm.nih.gov/entrez/query.fcgi?cmd=Retrieve&amp;db=nucleotide&amp;list_uids=5689137&amp;dopt=GenBank">http://www.ncbi.nlm.nih.gov/entrez/query.fcgi?cmd=Retrieve&amp;db=nucleotide&amp;list_uids=5689137&amp;dopt=GenBank</a>     |
| 845 | From Monsanto | Starch branching enzymellb (Sbe2b/Ae)                  | Oryza sativa    | 3000  |      |      |      |      |                                                                                                                                                                                                                                                           |
| 846 | D38221        | Starch synthaseI (Ss1)                                 | Oryza sativa    | 139   |      |      |      |      | <a href="http://www.ncbi.nlm.nih.gov/entrez/query.fcgi?cmd=Retrieve&amp;db=nucleotide&amp;list_uids=961495&amp;dopt=GenBank">http://www.ncbi.nlm.nih.gov/entrez/query.fcgi?cmd=Retrieve&amp;db=nucleotide&amp;list_uids=961495&amp;dopt=GenBank</a>       |
| 847 | X64770        | Sucrose synthase (Sh1)                                 | Oryza sativa    | 1677  |      |      |      |      | <a href="http://www.ncbi.nlm.nih.gov/entrez/query.fcgi?cmd=Retrieve&amp;db=nucleotide&amp;list_uids=20365&amp;dopt=GenBank">http://www.ncbi.nlm.nih.gov/entrez/query.fcgi?cmd=Retrieve&amp;db=nucleotide&amp;list_uids=20365&amp;dopt=GenBank</a>         |
| 848 | AC084380      | Sucrose synthase (Sus1)                                | Oryza sativa    | 12416 |      |      |      |      | <a href="http://www.ncbi.nlm.nih.gov/entrez/query.fcgi?cmd=Retrieve&amp;db=nucleotide&amp;list_uids=1462508&amp;dopt=GenBank">http://www.ncbi.nlm.nih.gov/entrez/query.fcgi?cmd=Retrieve&amp;db=nucleotide&amp;list_uids=1462508&amp;dopt=GenBank</a>     |
| 849 | AB015615      | Sugary1 (Su1)                                          | Oryza sativa    | 1486  |      |      |      |      | <a href="http://www.ncbi.nlm.nih.gov/entrez/query.fcgi?cmd=Retrieve&amp;db=nucleotide&amp;list_uids=3252793&amp;dopt=GenBank">http://www.ncbi.nlm.nih.gov/entrez/query.fcgi?cmd=Retrieve&amp;db=nucleotide&amp;list_uids=3252793&amp;dopt=GenBank</a>     |
| 850 | AP003073      | Calcium-dependent protein kinase (CDPK)                | Oryza sativa    | 3077  |      |      |      |      | <a href="http://www.ncbi.nlm.nih.gov/entrez/query.fcgi?cmd=Retrieve&amp;db=nucleotide&amp;list_uids=1224912&amp;dopt=GenBank">http://www.ncbi.nlm.nih.gov/entrez/query.fcgi?cmd=Retrieve&amp;db=nucleotide&amp;list_uids=1224912&amp;dopt=GenBank</a>     |
| 851 | D63955        | Gm1p15 (bZIP factor)                                   | Oryza sativa    | 2798  |      |      |      |      | <a href="http://www.ncbi.nlm.nih.gov/entrez/query.fcgi?cmd=Retrieve&amp;db=nucleotide&amp;list_uids=14289164&amp;dopt=GenBank">http://www.ncbi.nlm.nih.gov/entrez/query.fcgi?cmd=Retrieve&amp;db=nucleotide&amp;list_uids=14289164&amp;dopt=GenBank</a>   |
| 852 | AP002855      | Golden2                                                | Oryza sativa    | 4083  |      |      |      |      | <a href="http://www.ncbi.nlm.nih.gov/entrez/query.fcgi?cmd=Retrieve&amp;db=nucleotide&amp;list_uids=11034690&amp;dopt=GenBank">http://www.ncbi.nlm.nih.gov/entrez/query.fcgi?cmd=Retrieve&amp;db=nucleotide&amp;list_uids=11034690&amp;dopt=GenBank</a>   |
| 853 | AP002861      | Indeterminate spikelet 1 (ids1)                        | Oryza sativa    |       |      |      |      |      | <a href="http://www.ncbi.nlm.nih.gov/entrez/query.fcgi?cmd=Retrieve&amp;db=nucleotide&amp;list_uids=1080005&amp;dopt=GenBank">http://www.ncbi.nlm.nih.gov/entrez/query.fcgi?cmd=Retrieve&amp;db=nucleotide&amp;list_uids=1080005&amp;dopt=GenBank</a>     |
| 854 | U70541        | Liguleless1 (lg1)                                      | Oryza sativa    | 1966  |      |      |      |      | <a href="http://www.ncbi.nlm.nih.gov/entrez/query.fcgi?cmd=Retrieve&amp;db=nucleotide&amp;list_uids=2149018&amp;dopt=GenBank">http://www.ncbi.nlm.nih.gov/entrez/query.fcgi?cmd=Retrieve&amp;db=nucleotide&amp;list_uids=2149018&amp;dopt=GenBank</a>     |
| 855 | AC034258      | P1-rr                                                  | Oryza sativa    | 2587  |      |      |      |      | <a href="http://www.ncbi.nlm.nih.gov/entrez/query.fcgi?cmd=Retrieve&amp;db=nucleotide&amp;list_uids=13702835&amp;dopt=GenBank">http://www.ncbi.nlm.nih.gov/entrez/query.fcgi?cmd=Retrieve&amp;db=nucleotide&amp;list_uids=13702835&amp;dopt=GenBank</a>   |
| 856 | Y15219        | Pericarp color1 (P1)                                   | Oryza sativa    | 238   |      |      |      |      | <a href="http://www.ncbi.nlm.nih.gov/entrez/query.fcgi?cmd=Retrieve&amp;db=nucleotide&amp;list_uids=4138298&amp;dopt=GenBank">http://www.ncbi.nlm.nih.gov/entrez/query.fcgi?cmd=Retrieve&amp;db=nucleotide&amp;list_uids=4138298&amp;dopt=GenBank</a>     |
| 857 | AF474141      | Pericarp color2 (P2)                                   | Oryza sativa    | 876   |      |      |      |      | <a href="http://www.ncbi.nlm.nih.gov/entrez/query.fcgi?cmd=Retrieve&amp;db=nucleotide&amp;list_uids=19072771&amp;dopt=GenBank">http://www.ncbi.nlm.nih.gov/entrez/query.fcgi?cmd=Retrieve&amp;db=nucleotide&amp;list_uids=19072771&amp;dopt=GenBank</a>   |
| 858 | AB036786      | Protein kinase alpha subunit (CK2)                     | Oryza sativa    | 1098  |      |      |      |      | <a href="http://www.ncbi.nlm.nih.gov/entrez/query.fcgi?cmd=Retrieve&amp;db=nucleotide&amp;list_uids=12697576&amp;dopt=GenBank">http://www.ncbi.nlm.nih.gov/entrez/query.fcgi?cmd=Retrieve&amp;db=nucleotide&amp;list_uids=12697576&amp;dopt=GenBank</a>   |
| 859 | AF229199      | Receptor-like protein kinase (PK1)                     | Oryza sativa    |       |      |      |      |      | <a href="http://www.ncbi.nlm.nih.gov/entrez/query.fcgi?cmd=Retrieve&amp;db=nucleotide&amp;list_uids=11244751&amp;dopt=GenBank">http://www.ncbi.nlm.nih.gov/entrez/query.fcgi?cmd=Retrieve&amp;db=nucleotide&amp;list_uids=11244751&amp;dopt=GenBank</a>   |
| 860 | AB058397      | terminal ear1                                          | Oryza sativa    | 1731  |      |      |      |      | <a href="http://www.ncbi.nlm.nih.gov/entrez/query.fcgi?cmd=Retrieve&amp;db=nucleotide&amp;list_uids=13442779&amp;dopt=GenBank">http://www.ncbi.nlm.nih.gov/entrez/query.fcgi?cmd=Retrieve&amp;db=nucleotide&amp;list_uids=13442779&amp;dopt=GenBank</a>   |
| 861 | AP003105      | ZEMb                                                   | Oryza sativa    | 4315  |      |      |      |      | <a href="http://www.ncbi.nlm.nih.gov/entrez/query.fcgi?cmd=Retrieve&amp;db=nucleotide&amp;list_uids=131611410&amp;dopt=GenBank">http://www.ncbi.nlm.nih.gov/entrez/query.fcgi?cmd=Retrieve&amp;db=nucleotide&amp;list_uids=131611410&amp;dopt=GenBank</a> |
| 862 | AF345911      | ZMADS2, MADS-box gene expressed in root tip and pollen | Oryza sativa    | 125   |      |      |      |      | <a href="http://www.ncbi.nlm.nih.gov/entrez/query.fcgi?cmd=Retrieve&amp;db=nucleotide&amp;list_uids=15824794&amp;dopt=GenBank">http://www.ncbi.nlm.nih.gov/entrez/query.fcgi?cmd=Retrieve&amp;db=nucleotide&amp;list_uids=15824794&amp;dopt=GenBank</a>   |
| 863 | AP002836      | Me gene expressed in immature embryo                   | Oryza sativa    | 2740  |      |      |      |      | <a href="http://www.ncbi.nlm.nih.gov/entrez/query.fcgi?cmd=Retrieve&amp;db=nucleotide&amp;list_uids=9711819&amp;dopt=GenBank">http://www.ncbi.nlm.nih.gov/entrez/query.fcgi?cmd=Retrieve&amp;db=nucleotide&amp;list_uids=9711819&amp;dopt=GenBank</a>     |
| 864 | AL513402      | Ferredoxin II                                          | Oryza sativa    |       |      |      | 6001 |      | <a href="http://www.ncbi.nlm.nih.gov/entrez/query.fcgi?cmd=Retrieve&amp;db=Nucleotide&amp;list_uids=12711300&amp;dopt=GenBank">http://www.ncbi.nlm.nih.gov/entrez/query.fcgi?cmd=Retrieve&amp;db=Nucleotide&amp;list_uids=12711300&amp;dopt=GenBank</a>   |
| 865 | AC121364      | pyruvate decarboxylase2                                | Oryza sativa    |       |      |      |      |      | <a href="http://www.ncbi.nlm.nih.gov/entrez/query.fcgi?cmd=Retrieve&amp;db=nucleotide&amp;list_uids=20975773&amp;dopt=GenBank">http://www.ncbi.nlm.nih.gov/entrez/query.fcgi?cmd=Retrieve&amp;db=nucleotide&amp;list_uids=20975773&amp;dopt=GenBank</a>   |
| 866 | AC096688      | translational elongation factor EF-TuM                 | Oryza sativa    |       |      |      |      |      | <a href="http://www.ncbi.nlm.nih.gov/entrez/query.fcgi?cmd=Retrieve&amp;db=nucleotide&amp;list_uids=18092992&amp;dopt=GenBank">http://www.ncbi.nlm.nih.gov/entrez/query.fcgi?cmd=Retrieve&amp;db=nucleotide&amp;list_uids=18092992&amp;dopt=GenBank</a>   |
| 867 | AP004161      | calpain-like protein (dek1)                            | Oryza sativa    |       |      |      |      |      | <a href="http://www.ncbi.nlm.nih.gov/entrez/query.fcgi?cmd=Retrieve&amp;db=nucleotide&amp;list_uids=15594173&amp;dopt=GenBank">http://www.ncbi.nlm.nih.gov/entrez/query.fcgi?cmd=Retrieve&amp;db=nucleotide&amp;list_uids=15594173&amp;dopt=GenBank</a>   |
| 868 | AY043215      | Teosinte branched 1 (tb1)                              | Oryza sativa    |       |      |      |      |      | <a href="http://www.ncbi.nlm.nih.gov/entrez/query.fcgi?cmd=Retrieve&amp;db=nucleotide&amp;list_uids=1574104&amp;dopt=GenBank">http://www.ncbi.nlm.nih.gov/entrez/query.fcgi?cmd=Retrieve&amp;db=nucleotide&amp;list_uids=1574104&amp;dopt=GenBank</a>     |
| 869 | X61280        | HRPG                                                   | Oryza sativa    | 1060  | 1060 |      |      | 2467 | <a href="http://www.ncbi.nlm.nih.gov/entrez/query.fcgi?cmd=Retrieve&amp;db=nucleotide&amp;list_uids=433815&amp;dopt=GenBank">http://www.ncbi.nlm.nih.gov/entrez/query.fcgi?cmd=Retrieve&amp;db=nucleotide&amp;list_uids=433815&amp;dopt=GenBank</a>       |
| 870 | L10345        | Beta-amylase (Amy2)                                    | Oryza sativa    | 155   | 208  |      | 106  | 3043 | <a href="http://www.ncbi.nlm.nih.gov/entrez/query.fcgi?cmd=Retrieve&amp;db=nucleotide&amp;list_uids=169776&amp;dopt=GenBank">http://www.ncbi.nlm.nih.gov/entrez/query.fcgi?cmd=Retrieve&amp;db=nucleotide&amp;list_uids=169776&amp;dopt=GenBank</a>       |
| 871 | AF466204      | Teosinte branched 1 (tb1)                              | S. bicolor      |       |      |      |      |      | <a href="http://www.ncbi.nlm.nih.gov/entrez/query.fcgi?cmd=Retrieve&amp;db=nucleotide&amp;list_uids=18568251&amp;dopt=GenBank">http://www.ncbi.nlm.nih.gov/entrez/query.fcgi?cmd=Retrieve&amp;db=nucleotide&amp;list_uids=18568251&amp;dopt=GenBank</a>   |
| 872 | X07931        | Wxy1                                                   | Hordeum vulgare | 988   | 1590 | 988  | 794  | 5153 | <a href="http://www.ncbi.nlm.nih.gov/entrez/query.fcgi?cmd=Retrieve&amp;db=nucleotide&amp;list_uids=19126&amp;dopt=GenBank">http://www.ncbi.nlm.nih.gov/entrez/query.fcgi?cmd=Retrieve&amp;db=nucleotide&amp;list_uids=19126&amp;dopt=GenBank</a>         |
| 873 | X12735        | Cab2                                                   | Hordeum vulgare | 181   | 181  |      |      |      | <a href="http://www.ncbi.nlm.nih.gov/entrez/query.fcgi?cmd=Retrieve&amp;db=nucleotide&amp;list_uids=189423&amp;dopt=GenBank">http://www.ncbi.nlm.nih.gov/entrez/query.fcgi?cmd=Retrieve&amp;db=nucleotide&amp;list_uids=189423&amp;dopt=GenBank</a>       |
| 874 | AF234163      | Ss1                                                    | Hordeum vulgare | 1128  | 1128 |      |      | 8387 | <a href="http://www.ncbi.nlm.nih.gov/entrez/query.fcgi?cmd=Retrieve&amp;db=nucleotide&amp;list_uids=7188795&amp;dopt=GenBank">http://www.ncbi.nlm.nih.gov/entrez/query.fcgi?cmd=Retrieve&amp;db=nucleotide&amp;list_uids=7188795&amp;dopt=GenBank</a>     |
| 875 | AJ301645      | Bmy1                                                   | Hordeum vulgare | 1261  | 1261 |      |      | 4951 | <a href="http://www.ncbi.nlm.nih.gov/entrez/query.fcgi?cmd=Retrieve&amp;db=nucleotide&amp;list_uids=11322498&amp;dopt=GenBank">http://www.ncbi.nlm.nih.gov/entrez/query.fcgi?cmd=Retrieve&amp;db=nucleotide&amp;list_uids=11322498&amp;dopt=GenBank</a>   |
| 876 | X58339        | CHS                                                    | Hordeum vulgare | 2007  |      | 2007 | 1813 | 5230 | <a href="http://www.ncbi.nlm.nih.gov/entrez/query.fcgi?cmd=Retrieve&amp;db=nucleotide&amp;list_uids=22087&amp;dopt=GenBank">http://www.ncbi.nlm.nih.gov/entrez/query.fcgi?cmd=Retrieve&amp;db=nucleotide&amp;list_uids=22087&amp;dopt=GenBank</a>         |
| 877 | X12733        | Adh2                                                   | Hordeum vulgare | 218   | 288  | 218  | 182  | 2310 | <a href="http://www.ncbi.nlm.nih.gov/entrez/query.fcgi?cmd=Retrieve&amp;db=nucleotide&amp;list_uids=18883&amp;dopt=GenBank">http://www.ncbi.nlm.nih.gov/entrez/query.fcgi?cmd=Retrieve&amp;db=nucleotide&amp;list_uids=18883&amp;dopt=GenBank</a>         |
