# Supplementary material
Source: PubMed Central journal article supplement (PMC153722)
Supplement: plntcell_15_5_1143__2.pdf [file plntcell_15_5_1143__2.pdf]

| All Orthologous Maize-Rice Promoters |                 | VISTA Maize-Rice CNS |          | All Promoters-VISTA CNS overlap |
|--------------------------------------|-----------------|----------------------|----------|---------------------------------|
| Element                              | Occurrences/Mbp | Element              | Occur/Mb | Occur/Mb                        |
| AAAAAAA                              | 1136            | AAAAAAA              | 2249     | 1136                            |
| AAAAAAC                              | 289             | TTTTTTT              | 1776     | 743                             |
| AAAAAAG                              | 267             | TATATAT              | 473      | 675                             |
| AAAAAAT                              | 473             | ATATATA              | 592      | 620                             |
| AAAAACA                              | 220             | CTCTCTC              | 118      | 570                             |
| AAAAACC                              | 141             | TCTCTCT              | 237      | 527                             |
| AAAAACG                              | 105             | AAAAAAT              | 355      | 473                             |
| AAAAACT                              | 180             | AAATAAA              | 355      | 462                             |
| AAAAAGA                              | 231             | ATTTTTT              | 710      | 462                             |
| AAAAAGC                              | 159             | AAAAATA              | 237      | 411                             |
| AAAAAGG                              | 159             | ATATTTT              | 355      | 408                             |
| AAAAAGT                              | 137             | TTTTTTA              | 473      | 408                             |
| AAAAATA                              | 411             | AAAATAA              | 473      | 393                             |
| AAAAATC                              | 216             | ATAAATA              | 473      | 390                             |
| AAAAATG                              | 202             | AATAAAA              | 592      | 386                             |
| AAAAATT                              | 238             | TAAAAAA              | 947      | 386                             |
| AAAACAA                              | 253             | TATTTTT              | 710      | 382                             |
| AAAACAC                              | 101             | AAAATAT              | 473      | 379                             |
| AAAACAG                              | 108             | TATATTT              | 710      | 372                             |
| AAAACAT                              | 188             | TTTGTTT              | 355      | 372                             |
| AAAACCA                              | 170             | ATAAAAT              | 355      | 368                             |
| AAAACCC                              | 97              | TTTTATT              | 473      | 368                             |
| AAAACCG                              | 69              | AAATATA              | 592      | 361                             |
| AAAACCT                              | 126             | TTTATTT              | 237      | 361                             |
| AAAACGA                              | 72              | AAACAAA              | 355      | 357                             |
| AAAACGC                              | 54              | AGAAAAA              | 829      | 357                             |
| AAAACGG                              | 87              | TATTTAT              | 355      | 354                             |
| AAAACGT                              | 18              | AAGAAGA              | 237      | 346                             |
| AAAAC TA                             | 162             | TTTTTAT              | 355      | 346                             |
| AAAAC TC                             | 94              | GAAAAAA              | 355      | 343                             |
| AAAAC TG                             | 112             | ATAAAAA              | 355      | 339                             |
| AAAAC TT                             | 155             | AAGAAAA              | 237      | 325                             |
| AAAAGAA                              | 249             | AATAAAT              | 118      | 321                             |
| AAAAGAC                              | 76              | TAAAATA              | 237      | 321                             |
| AAAAGAG                              | 123             | TTATTTT              | 592      | 317                             |
| AAAAGAT                              | 123             | ATATAAT              | 237      | 314                             |
| AAAAGCA                              | 144             | TTTCTTT              | 355      | 314                             |
| AAAAGCC                              | 90              | TATAAAT              | 237      | 310                             |
| AAAAGCG                              | 51              | TTTAAAT              | 118      | 310                             |
| AAAAGCT                              | 148             | TTTTTAA              | 355      | 310                             |
| AAAAGGA                              | 144             | TTTTTTG              | 118      | 310                             |
| AAAAGGC                              | 83              | ATATATT              | 237      | 307                             |
| AAAAGGG                              | 76              | TAAATAT              | 237      | 307                             |
| AAAAGGT                              | 101             | TATAAAA              | 473      | 307                             |
| AAAAGTA                              | 119             | AAATATT              | 118      | 303                             |
| AAAAGTC                              | 79              | CAAAAAA              | 237      | 299                             |
| AAAAGTG                              | 97              | TATATAA              | 710      | 299                             |
| AAAAGTT                              | 126             | TTTTCTT              | 829      | 296                             |
| AAAATAA                              | 393             | CCTCCTC              | 1065     | 292                             |
| AAAATAC                              | 115             | TAATTTT              | 118      | 292                             |

|          |     |         |     |     |
|----------|-----|---------|-----|-----|
| AAAATAG  | 148 | AAAAAAC | 473 | 289 |
| AAAATAT  | 379 | AGAGAGA | 355 | 289 |
| AAAATCA  | 166 | ATTTAAA | 237 | 289 |
| AAAATCC  | 130 | TAAAATT | 355 | 289 |
| AAAATCG  | 61  | TTCTTTT | 355 | 289 |
| AAAATCT  | 184 | TTGTTTT | 237 | 289 |
| AAAATGA  | 202 | ATTTATA | 118 | 285 |
| AAAATGC  | 112 | ATTTATA | 118 | 285 |
| AAAATGG  | 137 | CTCCTCC | 829 | 285 |
| AAAATGT  | 180 | TCTTCTT | 237 | 285 |
| AAAATTA  | 242 | TGTTTTT | 237 | 281 |
| AAAATTC  | 188 | TTAATTT | 118 | 281 |
| AAAATTG  | 126 | TTTAATT | 118 | 281 |
| AAAATTT  | 253 | CTTTTTT | 118 | 278 |
| AAACAAA  | 357 | TTTTGTT | 118 | 278 |
| AAACAAC  | 130 | AATATAT | 118 | 274 |
| AAACAAG  | 148 | ATATAAA | 237 | 274 |
| AAACAAT  | 159 | ATATTTA | 592 | 274 |
| AAACACA  | 137 | ATGCATG | 473 | 274 |
| AAACACC  | 87  | GAGAGAG | 473 | 274 |
| AAACACG  | 83  | TTAAAAA | 118 | 274 |
| AAACACT  | 105 | AATATTT | 237 | 271 |
| AAACAGA  | 72  | GAAGAAG | 118 | 271 |
| AAACAGA  | 72  | TTATATA | 355 | 271 |
| AAACAGC  | 54  | TTATTTA | 118 | 271 |
| AAACAGG  | 105 | TTTAAAA | 355 | 271 |
| AAACATA  | 152 | AAAAAAG | 355 | 267 |
| AAACATC  | 97  | TAAATAA | 473 | 267 |
| AAACATG  | 152 | TAAAAAT | 118 | 263 |
| AAACATT  | 148 | TATTATT | 237 | 263 |
| AAACCAA  | 184 | TTCTTCT | 118 | 263 |
| AAACCAC  | 83  | TTTTTCT | 355 | 263 |
| AAACCAG  | 97  | CTTCTTC | 118 | 260 |
| AAACCAT  | 90  | CTCCTCT | 118 | 256 |
| AAACCCA  | 90  | TTATATT | 237 | 256 |
| AAACCCC  | 40  | AAAACAA | 237 | 253 |
| AAACCCG  | 54  | AAAATTT | 237 | 253 |
| AAACCCCT | 94  | ATTATAT | 118 | 253 |
| AAACCGA  | 47  | TAAATTA | 237 | 253 |
| AAACCGC  | 22  | TATTTTA | 237 | 253 |
| AAACCGG  | 90  | TTTATAT | 118 | 253 |
| AAACCGT  | 40  | TTTTAAA | 355 | 253 |
| AAACCTA  | 105 | AAATTTA | 237 | 249 |
| AAACCTC  | 87  | ATAATAA | 118 | 249 |
| AAACCTG  | 58  | CATATAT | 118 | 249 |
| AAACCTT  | 97  | TATAATA | 237 | 249 |
| AAACGAA  | 58  | TTTTAAT | 237 | 249 |
| AAACGAC  | 47  | TTTTTTC | 355 | 249 |
| AAACGAG  | 76  | AAATTAT | 118 | 245 |
| AAACGAT  | 54  | AATATAA | 355 | 245 |
| AAACGCA  | 61  | ATTATTT | 473 | 245 |
| AAACGCC  | 43  | ATTTTAT | 118 | 245 |

|         |     |         |     |     |
|---------|-----|---------|-----|-----|
| AAACGCG | 25  | CTATATA | 592 | 245 |
| AAACGCT | 29  | TAATAAT | 118 | 245 |
| AAACGGA | 36  | AAATTTT | 237 | 242 |
| AAACGGC | 40  | AGAAGAA | 237 | 242 |
| AAACGGG | 69  | ATAAATT | 118 | 242 |
| AAACGGT | 47  | ATTTTTA | 237 | 242 |
| AAACGTA | 14  | CTATAAA | 473 | 242 |
| AAACGTC | 14  | AAAAATT | 118 | 238 |
| AAACGTG | 29  | AATAATA | 237 | 238 |
| AAACGTT | 25  | AATTATT | 237 | 238 |
| AAACTAA | 180 | TATAATT | 118 | 238 |
| AAACTAC | 58  | TTTTATA | 355 | 238 |
| AAACTAG | 155 | AAATAAT | 118 | 234 |
| AAACTAT | 87  | AACAAAA | 355 | 234 |
| AAACTCA | 108 | CATGCAT | 473 | 234 |
| AAACTCC | 40  | CGCGCGC | 118 | 234 |
| AAACTCG | 29  | TCTCCTC | 118 | 234 |
| AAACTCT | 141 | CATTTTT | 118 | 231 |
| AAACTGA | 94  | TTAAATA | 237 | 231 |
| AAACTGC | 51  | GTTTTTT | 118 | 227 |
| AAACTGG | 65  | ATAATAT | 473 | 224 |
| AAACTGT | 115 | TTTATTA | 237 | 224 |
| AAACTTA | 105 | TTTCTCT | 118 | 224 |
| AAACTTC | 65  | AAAAACA | 237 | 220 |
| AAACTTG | 119 | AAATTAA | 118 | 220 |
| AAACTTT | 206 | AATTAAA | 237 | 220 |
| AAAGAAA | 299 | ATTTAAT | 118 | 220 |
| AAAGAAC | 90  | ATTTTAA | 473 | 220 |
| AAAGAAG | 144 | CTCTCCT | 118 | 220 |
| AAAGAAT | 130 | TAAATTT | 118 | 220 |
| AAAGACA | 83  | TGATTTT | 118 | 220 |
| AAAGACC | 47  | TTAAAAT | 355 | 220 |
| AAAGACG | 61  | AAAAATC | 592 | 216 |
| AAAGACT | 54  | AAAGCAA | 118 | 216 |
| AAAGAGA | 133 | ATTTGAT | 118 | 216 |
| AAAGAGC | 83  | ATTTTCT | 237 | 216 |
| AAAGAGG | 133 | CAAACAA | 118 | 216 |
| AAAGAGT | 29  | TATTTAA | 355 | 216 |
| AAAGATA | 108 | TGCATGC | 237 | 216 |
| AAAGATC | 58  | AAATGTT | 118 | 213 |
| AAAGATG | 105 | AATTTTA | 473 | 213 |
| AAAGATT | 101 | ATAATTT | 118 | 209 |
| AAAGCAA | 216 | CTAGCTA | 118 | 209 |
| AAAGCAC | 101 | GATTTTT | 237 | 209 |
| AAAGCAG | 58  | GCATGCA | 355 | 209 |
| AAAGCAT | 115 | TTGATTT | 118 | 209 |
| AAAGCCA | 105 | AAACTTT | 237 | 206 |
| AAAGCCC | 65  | AACCAAA | 473 | 206 |
| AAAGCCG | 47  | TAATTTA | 118 | 206 |
| AAAGCCT | 36  | TCTTTCT | 118 | 206 |
| AAAGCGA | 76  | TTGTTTG | 355 | 206 |
| AAAGCGA | 76  | TTTATAA | 355 | 206 |

|         |     |         |     |     |
|---------|-----|---------|-----|-----|
| AAAGCGG | 61  | TTTGAAA | 118 | 206 |
| AAAGCGT | 51  | AAAAATG | 118 | 202 |
| AAAGCTA | 144 | ACCAAAA | 237 | 202 |
| AAAGCTC | 76  | CAAATTT | 237 | 202 |
| AAAGCTG | 43  | CCTCTCC | 118 | 202 |
| AAAGCTT | 87  | TAGAAAA | 118 | 202 |
| AAAGGAA | 97  | TATATTA | 237 | 202 |
| AAAGGAC | 32  | TCCTCCT | 947 | 202 |
| AAAGGAG | 123 | TGATGAT | 118 | 202 |
| AAAGGAT | 76  | TTTAATA | 237 | 202 |
| AAAGGCA | 61  | AACAAAT | 355 | 198 |
| AAAGGCC | 61  | AATTTAT | 237 | 198 |
| AAAGGCG | 22  | ATTAAAA | 118 | 198 |
| AAAGGCT | 83  | CCCTCTC | 118 | 198 |
| AAAGGGA | 115 | GCTAGCT | 237 | 198 |
| AAAGGGC | 43  | TTATTTG | 237 | 198 |
| AAAGGGG | 90  | AGCTAGC | 355 | 195 |
| AAAGGGT | 69  | GAGAAAA | 355 | 195 |
| AAAGGTA | 101 | GCGCGCG | 237 | 195 |
| AAAGGTC | 51  | TTCTAAA | 118 | 195 |
| AAAGGTG | 61  | TTGAAAA | 118 | 195 |
| AAAGGTT | 90  | TTTTTGA | 118 | 195 |
| AAAGTAA | 83  | AAATATG | 118 | 191 |
| AAAGTAC | 58  | ATTATAA | 237 | 191 |
| AAAGTAG | 76  | CAAATAA | 118 | 191 |
| AAAGTAT | 112 | TCTCTTC | 473 | 191 |
| AAAGTCA | 69  | TTATAAA | 237 | 191 |
| AAAGTCC | 36  | TTTGTTG | 118 | 191 |
| AAAGTCG | 43  | TTTTAGT | 118 | 191 |
| AAAGTCT | 72  | AAATTCA | 237 | 188 |
| AAAGTGA | 58  | AACAAAC | 118 | 188 |
| AAAGTGC | 65  | ACATTTT | 118 | 188 |
| AAAGTGG | 69  | AGTTTTT | 118 | 188 |
| AAAGTGT | 72  | CATAAAT | 118 | 188 |
| AAAGTTA | 90  | CTTTCTT | 118 | 188 |
| AAAGTTC | 47  | TATATAC | 237 | 188 |
| AAAGTTG | 130 | TATATGT | 118 | 188 |
| AAAGTTT | 133 | TTTGCT  | 118 | 188 |
| AAATAAA | 462 | TTTTGTG | 118 | 188 |
| AAATAAC | 141 | AAAATCT | 118 | 184 |
| AAATAAG | 126 | ATATTAT | 237 | 184 |
| AAATAAT | 234 | ATTTTTT | 118 | 184 |
| AAATACA | 137 | GTTTGTT | 355 | 184 |
| AAATACC | 97  | TAATAAA | 118 | 184 |
| AAATACG | 47  | TAATAAA | 118 | 184 |
| AAATACT | 112 | TGCATTT | 118 | 184 |
| AAATAGA | 170 | TTTCAA  | 118 | 184 |
| AAATAGC | 65  | AAAAACT | 237 | 180 |
| AAATAGG | 94  | AAAATGT | 355 | 180 |
| AAATAGT | 112 | AAACTAA | 473 | 180 |
| AAATATA | 361 | AAATTTG | 118 | 180 |
| AAATATC | 115 | ATATTAA | 118 | 180 |

|          |     |         |     |     |
|----------|-----|---------|-----|-----|
| AAATATG  | 191 | ATCATAT | 118 | 180 |
| AAATATT  | 303 | ATGTTTT | 118 | 180 |
| AAATCAA  | 115 | ATTTTTG | 118 | 180 |
| AAATCAA  | 115 | CTATTTT | 118 | 180 |
| AAATCAC  | 76  | TCTCTCC | 118 | 180 |
| AAATCAT  | 177 | TCTTTTG | 118 | 180 |
| AAATCCA  | 123 | TTTGCTT | 592 | 180 |
| AAATCCC  | 69  | AAATCAT | 118 | 177 |
| AAATCCG  | 47  | AACAACA | 237 | 177 |
| AAATCCT  | 112 | AACTTTT | 237 | 177 |
| AAATCGA  | 51  | AGAAAAG | 237 | 177 |
| AAATCGC  | 36  | ATATGTT | 355 | 177 |
| AAATCGG  | 72  | ATCTCAT | 118 | 177 |
| AAATCGT  | 32  | CATATTT | 237 | 177 |
| AAATCTA  | 155 | ATCTTTT | 118 | 173 |
| AAATCTC  | 123 | ATGAAAA | 237 | 173 |
| AAATCTG  | 58  | CTCTTCT | 237 | 173 |
| AAATCTT  | 162 | CTTATTT | 237 | 173 |
| AAATGAA  | 173 | GAAAAAT | 473 | 173 |
| AAATGAC  | 112 | TAAATGT | 118 | 173 |
| AAATGAG  | 83  | TAATATA | 118 | 173 |
| AAATGAT  | 123 | TTATCTT | 118 | 173 |
| AAATGCA  | 119 | TTGGTTT | 118 | 173 |
| AAATGCC  | 54  | TTTCTTC | 355 | 173 |
| AAATGCG  | 47  | TTTGTA  | 118 | 173 |
| AAATGCT  | 101 | AAATAGA | 118 | 170 |
| AAATGGA  | 162 | AATCTTT | 118 | 170 |
| AAATGGC  | 47  | AATTTCT | 118 | 170 |
| AAATGGG  | 43  | ACAACAA | 118 | 170 |
| AAATGGT  | 123 | ACCAAAT | 118 | 170 |
| AAATGTA  | 155 | ATAGAAA | 237 | 170 |
| AAATGTC  | 69  | ATATATC | 118 | 170 |
| AAATGTG  | 97  | ATATTTG | 118 | 170 |
| AAATGTT  | 213 | CAAATAT | 118 | 170 |
| AAATTAA  | 220 | CGTCGTC | 118 | 170 |
| AAATTAC  | 119 | CTTTTCT | 237 | 170 |
| AAATTAG  | 101 | GAAGAAA | 237 | 170 |
| AAATTAT  | 245 | GAAGAAA | 237 | 170 |
| AAATTCA  | 188 | TAGAAAT | 118 | 170 |
| AAATTCC  | 94  | TATTTCA | 118 | 170 |
| AAATTCCG | 65  | TCTTCCT | 355 | 170 |
| AAATTCT  | 144 | TGTTTTG | 118 | 170 |
| AAATTGA  | 101 | TTAATAA | 118 | 170 |
| AAATTGC  | 94  | TTCATTT | 118 | 170 |
| AAATTGG  | 72  | TTTGATG | 118 | 170 |
| AAATTGT  | 137 | TTTGCA  | 355 | 170 |
| AAATTTA  | 249 | AAAATCA | 237 | 166 |
| AAATTTTC | 133 | AACACAA | 118 | 166 |
| AAATTTG  | 180 | AATATTA | 118 | 166 |
| AAATTTT  | 242 | ACCACCA | 118 | 166 |
| AACAAAA  | 234 | ATATACA | 237 | 166 |
| AACAAAC  | 188 | CCAAACA | 118 | 166 |

|         |     |          |     |     |
|---------|-----|----------|-----|-----|
| AACAAAG | 94  | CCTTTTT  | 118 | 166 |
| AACAAAT | 198 | CTAAAAA  | 118 | 166 |
| AACAACA | 177 | GTAAAAA  | 237 | 166 |
| AACAACC | 94  | TAAACAA  | 118 | 166 |
| AACAACG | 51  | TAGCTAG  | 237 | 166 |
| AACAACT | 123 | TATATCT  | 118 | 166 |
| AACAAGA | 101 | TATTTGT  | 237 | 166 |
| AACAAGC | 79  | TGTTGAT  | 118 | 166 |
| AACAAGG | 94  | TTGCTTT  | 355 | 166 |
| AACAAGT | 108 | AAAAC TA | 355 | 162 |
| AACAATA | 119 | AAATCTT  | 118 | 162 |
| AACAATC | 90  | AAATGGA  | 237 | 162 |
| AACAATG | 87  | AACTAAA  | 118 | 162 |
| AACAATT | 105 | ACACACA  | 355 | 162 |
| AACACAA | 166 | ACACACA  | 355 | 162 |
| AACACAC | 97  | AGCTAAA  | 118 | 162 |
| AACACAG | 36  | CAATAAA  | 118 | 162 |
| AACACAT | 130 | CCACCTC  | 237 | 162 |
| AACACCA | 97  | CTATTTA  | 355 | 162 |
| AACACCC | 22  | GAGAGGG  | 237 | 162 |
| AACACCG | 25  | GAGGAAG  | 118 | 162 |
| AACACCT | 61  | GTTTTGT  | 237 | 162 |
| AACACGA | 40  | TCTTGTT  | 355 | 162 |
| AACACGC | 32  | TGAAAAA  | 118 | 162 |
| AACACGG | 54  | TGTTTGG  | 237 | 162 |
| AACACGT | 58  | AAAAAGG  | 118 | 159 |
| AACACTA | 94  | ATATAAG  | 355 | 159 |
| AACACTC | 51  | ATATAGA  | 237 | 159 |
| AACACTG | 47  | CTTCTCT  | 118 | 159 |
| AACACTT | 69  | CTTGTTT  | 237 | 159 |
| AACAGAA | 97  | TGAAGAA  | 118 | 159 |
| AACAGAC | 51  | TGAAGAA  | 118 | 159 |
| AACAGAG | 69  | TGTAAAA  | 237 | 159 |
| AACAGAT | 61  | TGTATAT  | 355 | 159 |
| AACAGCA | 101 | TGTGTTT  | 118 | 159 |
| AACAGCC | 25  | TGTTTGT  | 355 | 159 |
| AACAGCG | 25  | TTCTCTT  | 355 | 159 |
| AACAGCT | 58  | TTCTTAT  | 118 | 159 |
| AACAGGA | 65  | TTTGAT   | 118 | 159 |
| AACAGGC | 51  | AAACTAG  | 118 | 155 |
| AACAGGG | 51  | AAATCTA  | 355 | 155 |
| AACAGGT | 69  | AAATGTA  | 237 | 155 |
| AACAGTA | 65  | AATTCAA  | 237 | 155 |
| AACAGTC | 58  | AATTCAA  | 237 | 155 |
| AACAGTG | 61  | AATTTTC  | 355 | 155 |
| AACAGTT | 32  | ACAAAAT  | 355 | 155 |
| AACATAA | 141 | ATTCAAA  | 118 | 155 |
| AACATAC | 51  | CTCCCTC  | 237 | 155 |
| AACATAG | 83  | GAAAATA  | 118 | 155 |
| AACATAT | 123 | GCTTGTT  | 118 | 155 |
| AACATCA | 83  | GTATATA  | 355 | 155 |
| AACATCC | 61  | TCAAATA  | 118 | 155 |

|         |     |         |     |     |
|---------|-----|---------|-----|-----|
| AACATCG | 36  | TCTTATT | 237 | 155 |
| AACATCT | 94  | TGTTGCT | 118 | 155 |
| AACATGA | 94  | TTCTCTC | 237 | 155 |
| AACATGC | 79  | TTTCATT | 118 | 155 |
| AACATGG | 87  | TTTCCAA | 237 | 155 |
| AACATGT | 123 | TTTTATG | 237 | 155 |
| AACATTA | 83  | ACAAATA | 237 | 152 |
| AACATTC | 54  | AGAAACA | 118 | 152 |
| AACATTG | 69  | ATGCTTT | 118 | 152 |
| AACATTT | 144 | ATGTTGT | 118 | 152 |
| AACCAAA | 206 | CTTCCTC | 237 | 152 |
| AACCAAC | 90  | CTTTTAT | 473 | 152 |
| AACCAAG | 61  | GCAGCAG | 118 | 152 |
| AACCAAT | 90  | GGAAAAA | 118 | 152 |
| AACCACA | 83  | TAATATT | 237 | 152 |
| AACCACC | 79  | TAATTTG | 118 | 152 |
| AACCACG | 51  | TCCTCCC | 118 | 152 |
| AACCACT | 69  | TCTCCCT | 118 | 152 |
| AACCAGA | 108 | TGATATT | 118 | 152 |
| AACCAGC | 65  | TTCAAAA | 237 | 152 |
| AACCAGG | 32  | TTTAGTT | 118 | 152 |
| AACCAGT | 51  | TTTGATT | 118 | 152 |
| AACCATA | 61  | TTTGAT  | 237 | 152 |
| AACCATC | 83  | AAACATT | 118 | 148 |
| AACCATG | 115 | AAGAGAG | 237 | 148 |
| AACCATT | 58  | ATATGTA | 118 | 148 |
| AACCCAA | 112 | ATGATTT | 118 | 148 |
| AACCCAC | 83  | CAAATA  | 118 | 148 |
| AACCCAG | 29  | CACACAC | 355 | 148 |
| AACCCAT | 65  | CACCAA  | 237 | 148 |
| AACCCCA | 47  | CAGCAGC | 118 | 148 |
| AACCCCC | 43  | CCAAAAT | 118 | 148 |
| AACCCCG | 25  | CCCTCCT | 355 | 148 |
| AACCCCT | 36  | CTCCACC | 118 | 148 |
| AACCCGA | 43  | GAAAAAG | 118 | 148 |
| AACCCGC | 22  | GAAAGAA | 118 | 148 |
| AACCCGG | 40  | GAAAGAA | 118 | 148 |
| AACCCGT | 54  | GATATAT | 118 | 148 |
| AACCCTA | 112 | GCCAGCC | 237 | 148 |
| AACCCTC | 43  | GCTATAT | 118 | 148 |
| AACCCTG | 58  | GTTTTTG | 118 | 148 |
| AACCCTT | 79  | TACCAA  | 118 | 148 |
| AACCGAA | 79  | TATACAA | 237 | 148 |
| AACCGAC | 43  | TTCATC  | 118 | 148 |
| AACCGAG | 51  | TGATTTG | 118 | 148 |
| AACCGAT | 43  | TTATGTT | 118 | 148 |
| AACCGCA | 29  | TTCTTCC | 237 | 148 |
| AACCGCC | 22  | TTGTTTC | 118 | 148 |
| AACCGCG | 18  | TTTATGT | 118 | 148 |
| AACCGCT | 32  | AAAAGGA | 237 | 144 |
| AACCGGA | 51  | AAAGAAG | 118 | 144 |
| AACCGGC | 90  | AAAGCTA | 118 | 144 |

|         |     |         |     |     |
|---------|-----|---------|-----|-----|
| AACCGGG | 69  | AATATGT | 237 | 144 |
| AACCGGT | 51  | ACATAAA | 237 | 144 |
| AACCGTA | 18  | ACTATTT | 118 | 144 |
| AACCGTC | 36  | AGCCAGC | 473 | 144 |
| AACCGTG | 51  | AGGAAAA | 118 | 144 |
| AACCGTT | 25  | ATGATAT | 118 | 144 |
| AACCTAA | 69  | ATTTATG | 118 | 144 |
| AACCTAC | 54  | ATTTCAA | 118 | 144 |
| AACCTAG | 54  | CAATCCA | 237 | 144 |
| AACCTAT | 101 | CCCCCCC | 118 | 144 |
| AACCTCA | 47  | CCCCTCC | 592 | 144 |
| AACCTCC | 54  | CCTCCCC | 237 | 144 |
| AACCTCG | 32  | CGCCGCC | 355 | 144 |
| AACCTCT | 58  | CTGCTGC | 118 | 144 |
| AACCTGA | 47  | CTTTTCA | 118 | 144 |
| AACCTGC | 43  | GCCACCA | 118 | 144 |
| AACCTGG | 29  | GTGGTGG | 237 | 144 |
| AACCTGT | 22  | TAACAAA | 118 | 144 |
| AACCTTA | 40  | TATGTTG | 237 | 144 |
| AACCTTA | 40  | TATGTTT | 355 | 144 |
| AACCTTC | 97  | TCTAAAT | 118 | 144 |
| AACCTTG | 47  | TCTTTTC | 237 | 144 |
| AACGAAA | 79  | TGCATGG | 118 | 144 |
| AACGAAC | 43  | TGGTTTG | 118 | 144 |
| AACGAAG | 36  | TTCTTGT | 355 | 144 |
| AACGAAT | 22  | TTTATCA | 118 | 144 |
| AACGACA | 87  | TTTATTG | 237 | 144 |
| AACGACC | 36  | TTTGCTC | 118 | 144 |
| AACGACG | 36  | AAATAAC | 592 | 141 |
| AACGACT | 54  | AATAACA | 473 | 141 |
| AACGAGA | 40  | AATATAG | 118 | 141 |
| AACGAGC | 79  | AGAAAAC | 118 | 141 |
| AACGAGG | 51  | ATTTTCA | 118 | 141 |
| AACGAGT | 36  | CTAGTTT | 118 | 141 |
| AACGATA | 72  | CTCTCCC | 118 | 141 |
| AACGATC | 40  | GACGACG | 118 | 141 |
| AACGATG | 32  | TACATTT | 237 | 141 |
| AACGATT | 18  | TATAAGA | 237 | 141 |
| AACGCAA | 47  | TATGAAA | 118 | 141 |
| AACGCAC | 61  | TCAAACA | 118 | 141 |
| AACGCAG | 11  | TGTTCTT | 118 | 141 |
| AACGCAT | 32  | TTCTAGA | 118 | 141 |
| AACGCCA | 18  | AAAAAGT | 118 | 137 |
| AACGCCC | 43  | AAAATGG | 355 | 137 |
| AACGCCG | 18  | AAACACA | 118 | 137 |
| AACGCCT | 14  | AAATACA | 118 | 137 |
| AACGCGA | 14  | AAGAGAA | 118 | 137 |
| AACGCGC | 47  | AAGCTAA | 237 | 137 |
| AACGCGG | 14  | AATAAAG | 118 | 137 |
| AACGCGT | 18  | AATAATG | 118 | 137 |
| AACGCTA | 32  | AATGTTT | 118 | 137 |
| AACGCTC | 29  | ACCAAAC | 592 | 137 |



|          |     |         |     |     |
|----------|-----|---------|-----|-----|
| AACGCTG  | 22  | AGAAATT | 118 | 137 |
| AACGCTT  | 40  | ATAAAAG | 118 | 137 |
| AACGGAA  | 32  | ATAAACA | 118 | 137 |
| AACGGAC  | 29  | ATAATCT | 118 | 137 |
| AACGGAG  | 83  | ATGAAGA | 118 | 137 |
| AACGGAT  | 29  | CAAATCA | 237 | 137 |
| AACGGCA  | 40  | CATCTCT | 237 | 137 |
| AACGGCC  | 43  | GAAAATG | 118 | 137 |
| AACGGCG  | 43  | GCACACA | 118 | 137 |
| AACGGCT  | 83  | GCCGCCG | 237 | 137 |
| AACGGGA  | 36  | GCTCCTC | 237 | 137 |
| AACGGGC  | 79  | GGGAGAG | 118 | 137 |
| AACGGGG  | 32  | GGTGGTG | 118 | 137 |
| AACGGGT  | 40  | GTTTCTT | 118 | 137 |
| AACGGTA  | 14  | TCCCCTC | 237 | 137 |
| AACGGTA  | 14  | TGCTTTT | 237 | 137 |
| AACGGTG  | 22  | TGTGTGT | 118 | 137 |
| AACGGTT  | 25  | TGTTTCT | 118 | 137 |
| AACGTAA  | 11  | TTAAACT | 118 | 137 |
| AACGTAC  | 36  | TTGTTGC | 237 | 137 |
| AACGTAG  | 18  | TTTCTTG | 355 | 137 |
| AACGTAT  | 25  | AAAGAGA | 237 | 133 |
| AACGTCA  | 22  | AAAGAGG | 118 | 133 |
| AACGTCC  | 14  | AAAGTTT | 118 | 133 |
| AACGTCCG | 14  | AATATGA | 118 | 133 |
| AACGTCT  | 22  | AATCCAT | 118 | 133 |
| AACGTGA  | 32  | ACATATT | 118 | 133 |
| AACGTGC  | 36  | AGAGAGG | 118 | 133 |
| AACGTGG  | 40  | ATAAAAC | 237 | 133 |
| AACGTGT  | 43  | ATAAAGC | 355 | 133 |
| AACGTTA  | 18  | ATACAAA | 118 | 133 |
| AACGTTC  | 14  | ATACATA | 118 | 133 |
| AACGTTG  | 25  | ATATTTT | 118 | 133 |
| AACGTTT  | 40  | ATCTCTT | 237 | 133 |
| AACTAAA  | 162 | ATTTCTC | 118 | 133 |
| AACTAAC  | 79  | CAAAACA | 118 | 133 |
| AACTAAG  | 54  | CAACAAA | 118 | 133 |
| AACTAAT  | 115 | CAACAAA | 118 | 133 |
| AACTACA  | 51  | CATGCAA | 118 | 133 |
| AACTACC  | 47  | CATGCAA | 118 | 133 |
| AACTACG  | 18  | CATTTTC | 118 | 133 |
| AACTACT  | 97  | CCACCAA | 237 | 133 |
| AACTAGA  | 69  | CCAGCCA | 118 | 133 |
| AACTAGC  | 65  | CCCCCTT | 118 | 133 |
| AACTAGG  | 65  | CTAATTT | 118 | 133 |
| AACTAGT  | 115 | CTCATCT | 118 | 133 |
| AACTATA  | 101 | CTCCTTC | 237 | 133 |
| AACTATC  | 54  | CTTTGTC | 118 | 133 |
| AACTATG  | 65  | GAATTAT | 118 | 133 |
| AACTATT  | 87  | GGAAGAA | 118 | 133 |
| AACTCAA  | 83  | GTCTCTT | 118 | 133 |
| AACTCAC  | 69  | TAAACTA | 118 | 133 |

|         |     |         |     |     |
|---------|-----|---------|-----|-----|
| AACTCAG | 61  | TCATAAA | 118 | 133 |
| AACTCAT | 101 | TGAAAAT | 237 | 133 |
| AACTCCA | 79  | TGGTTTT | 118 | 133 |
| AACTCCC | 54  | TGTCTCT | 118 | 133 |
| AACTCCG | 32  | TTGGCAT | 237 | 133 |
| AACTCCT | 43  | TTGTAAA | 118 | 133 |
| AACTCGA | 47  | TTTTAAC | 237 | 133 |
| AACTCGC | 32  | AAAATCC | 118 | 130 |
| AACTCGG | 43  | AAACAAC | 118 | 130 |
| AACTCGT | 36  | AAAGTTG | 118 | 130 |
| AACTCTA | 79  | AAGTTTT | 118 | 130 |
| AACTCTC | 87  | AATTGGA | 118 | 130 |
| AACTCTG | 36  | ACAAAGA | 118 | 130 |
| AACTCTT | 112 | AGAAAGA | 118 | 130 |
| AACTGAA | 61  | ATAGATA | 237 | 130 |
| AACTGAC | 25  | ATGCACA | 118 | 130 |
| AACTGAG | 36  | ATGCATA | 118 | 130 |
| AACTGAT | 65  | ATTAATA | 237 | 130 |
| AACTGCA | 94  | ATTATTG | 118 | 130 |
| AACTGCA | 94  | ATTTGCT | 237 | 130 |
| AACTGCC | 14  | ATTTTAG | 237 | 130 |
| AACTGCT | 58  | CCCCTTT | 118 | 130 |
| AACTGGA | 58  | CTCCTCA | 237 | 130 |
| AACTGGC | 40  | CTCTCCA | 118 | 130 |
| AACTGGG | 36  | CTTGTTA | 118 | 130 |
| AACTGGT | 36  | CTTTGCT | 237 | 130 |
| AACTGTA | 87  | GGAGAGG | 118 | 130 |
| AACTGTC | 29  | GTGTTTT | 118 | 130 |
| AACTGTG | 43  | GTTTGGA | 237 | 130 |
| AACTGTT | 72  | TAAACTT | 118 | 130 |
| AACTTAA | 94  | TATAGAA | 237 | 130 |
| AACTTAC | 14  | TATATAG | 118 | 130 |
| AACTTAG | 51  | TCAATTT | 118 | 130 |
| AACTTAT | 112 | TCCAAAT | 118 | 130 |
| AACTTCA | 58  | TCCCTCC | 355 | 130 |
| AACTTCC | 83  | TCCTCCA | 118 | 130 |
| AACTTCG | 11  | TGCTCCT | 118 | 130 |
| AACTTCT | 87  | TGTAATT | 118 | 130 |
| AACTTGA | 69  | TGTTATT | 118 | 130 |
| AACTTGC | 54  | TTCATCA | 118 | 130 |
| AACTTGG | 90  | TTGCTTC | 355 | 130 |
| AACTTGT | 108 | AAAACCT | 118 | 126 |
| AACTTTA | 115 | AAAAGTT | 118 | 126 |
| AACTTTC | 79  | AAAATTG | 118 | 126 |
| AACTTTG | 108 | AAATAAG | 118 | 126 |
| AACTTTT | 177 | AAGCAAG | 237 | 126 |
| AAGAAAA | 325 | AAGGAAA | 237 | 126 |
| AAGAAAC | 97  | ACTTTTC | 118 | 126 |
| AAGAAAG | 170 | AGATATA | 118 | 126 |
| AAGAAAT | 144 | ATATGAA | 118 | 126 |
| AAGAACA | 112 | ATTACAA | 118 | 126 |
| AAGAACC | 54  | CAAAATC | 118 | 126 |

|         |     |          |     |     |
|---------|-----|----------|-----|-----|
| AAGAACG | 14  | CAAAC TA | 355 | 126 |
| AAGAACT | 87  | CAAAC TT | 118 | 126 |
| AAGAAGA | 346 | CAAGAGG  | 118 | 126 |
| AAGAAGC | 69  | CACCAAC  | 237 | 126 |
| AAGAAGG | 69  | CAGAAAA  | 237 | 126 |
| AAGAAGT | 105 | CATCTGA  | 118 | 126 |
| AAGAATA | 123 | CATGTTT  | 118 | 126 |
| AAGAATC | 54  | CCAATC   | 118 | 126 |
| AAGAATG | 61  | CCGCCCC  | 118 | 126 |
| AAGAATT | 105 | CCTATTT  | 118 | 126 |
| AAGACAA | 76  | CGTACGT  | 237 | 126 |
| AAGACAC | 58  | CTAGAAA  | 118 | 126 |
| AAGACAG | 40  | CTATATT  | 237 | 126 |
| AAGACAT | 97  | CTCTCTA  | 118 | 126 |
| AAGACCA | 69  | CTTCCCC  | 118 | 126 |
| AAGACCC | 36  | CTTTAAT  | 118 | 126 |
| AAGACCG | 40  | CTTTTTC  | 237 | 126 |
| AAGACCT | 32  | GAAGAGA  | 237 | 126 |
| AAGACGA | 83  | GTATAAA  | 237 | 126 |
| AAGACGC | 14  | GTTGATT  | 237 | 126 |
| AAGACGG | 51  | TAATACT  | 118 | 126 |
| AAGACGT | 18  | TACATGT  | 118 | 126 |
| AAGACTA | 58  | TAGATTT  | 118 | 126 |
| AAGACTC | 36  | TATCTTT  | 118 | 126 |
| AAGACTG | 22  | TCTTCAA  | 118 | 126 |
| AAGACTT | 69  | TTAAAGA  | 118 | 126 |
| AAGAGAA | 137 | TTAACAA  | 118 | 126 |
| AAGAGAC | 51  | AAAAGAG  | 118 | 123 |
| AAGAGAG | 148 | AAAAGAT  | 118 | 123 |
| AAGAGAT | 112 | AAATCCA  | 118 | 123 |
| AAGAGCA | 79  | AACA ACT | 118 | 123 |
| AAGAGCC | 69  | AATCTAG  | 237 | 123 |
| AAGAGCG | 76  | ACTAAAT  | 118 | 123 |
| AAGAGCT | 90  | AGAATAA  | 118 | 123 |
| AAGAGGA | 144 | AGAGTGT  | 118 | 123 |
| AAGAGGC | 90  | AGTTTTA  | 118 | 123 |
| AAGAGGG | 97  | ATAATAC  | 118 | 123 |
| AAGAGGT | 90  | ATAGAGA  | 118 | 123 |
| AAGAGTA | 43  | ATATGGA  | 118 | 123 |
| AAGAGTC | 47  | ATCATGT  | 118 | 123 |
| AAGAGTG | 58  | ATGTAAT  | 118 | 123 |
| AAGAGTT | 54  | ATTTGCA  | 118 | 123 |
| AAGATAA | 90  | CAAAC TA | 237 | 123 |
| AAGATAA | 90  | CAAAC TG | 237 | 123 |
| AAGATAG | 61  | CAATTTT  | 118 | 123 |
| AAGATAT | 141 | CATCTTC  | 118 | 123 |
| AAGATCA | 69  | CATGCAC  | 118 | 123 |
| AAGATCC | 29  | CATTTCT  | 118 | 123 |
| AAGATCG | 36  | CCAAAAG  | 118 | 123 |
| AAGATCT | 61  | CCAAGCA  | 118 | 123 |
| AAGATGA | 97  | CCATTCC  | 118 | 123 |
| AAGATGC | 47  | CCGCGCG  | 237 | 123 |

|         |     |         |     |     |
|---------|-----|---------|-----|-----|
| AAGATGG | 97  | CGCCCGC | 355 | 123 |
| AAGATGT | 87  | CTGTTCT | 118 | 123 |
| AAGATTA | 90  | GCCCCCA | 118 | 123 |
| AAGATTC | 65  | GCCGGCC | 118 | 123 |
| AAGATTG | 65  | GCTTTTT | 118 | 123 |
| AAGATTT | 162 | GTTTCCA | 118 | 123 |
| AAGCAAA | 220 | TACAAAT | 118 | 123 |
| AAGCAAC | 61  | TACTTTT | 237 | 123 |
| AAGCAAG | 126 | TCCACCT | 118 | 123 |
| AAGCAAT | 123 | TCTGTTT | 237 | 123 |
| AAGCACA | 90  | TGCTATA | 118 | 123 |
| AAGCACC | 72  | TGTACAT | 355 | 123 |
| AAGCACG | 79  | TGTTGTT | 118 | 123 |
| AAGCACT | 47  | TTGGTGT | 118 | 123 |
| AAGCAGA | 72  | TTGTGCT | 355 | 123 |
| AAGCAGC | 72  | TTTAGAA | 118 | 123 |
| AAGCAGG | 47  | AAACTTG | 118 | 119 |
| AAGCAGT | 32  | AACAATA | 118 | 119 |
| AAGCATA | 65  | AAGTTTG | 118 | 119 |
| AAGCATC | 54  | AATACAA | 237 | 119 |
| AAGCATG | 94  | ACAATAA | 355 | 119 |
| AAGCATT | 108 | ACAATAT | 118 | 119 |
| AAGCCAA | 94  | ACTAGTT | 118 | 119 |
| AAGCCAC | 54  | ATAGTAA | 118 | 119 |
| AAGCCAG | 58  | ATCTATA | 118 | 119 |
| AAGCCAT | 72  | ATCTGTT | 118 | 119 |
| AAGCCCA | 76  | ATTACTA | 118 | 119 |
| AAGCCCC | 43  | CACTTTT | 118 | 119 |
| AAGCCCG | 43  | CATTATT | 118 | 119 |
| AAGCCCT | 47  | CCAAAAC | 118 | 119 |
| AAGCCGA | 36  | CCAACTC | 237 | 119 |
| AAGCCGC | 36  | CCATCTT | 118 | 119 |
| AAGCCGG | 43  | CCGGCCC | 237 | 119 |
| AAGCCGT | 47  | CCGGCCG | 237 | 119 |
| AAGCCTA | 58  | CCTATAT | 355 | 119 |
| AAGCCTC | 58  | CCTTCCC | 592 | 119 |
| AAGCCTG | 14  | CTAAATT | 118 | 119 |
| AAGCCTT | 76  | CTCTTCA | 118 | 119 |
| AAGCGAA | 101 | CTTCTTG | 118 | 119 |
| AAGCGAC | 36  | CTTTAAA | 118 | 119 |
| AAGCGAG | 58  | CTTTCTG | 118 | 119 |
| AAGCGAT | 51  | GATCATA | 118 | 119 |
| AAGCGCA | 32  | GATTATA | 237 | 119 |
| AAGCGCC | 36  | GCCCTCT | 118 | 119 |
| AAGCGCG | 4   | GCCGCCC | 237 | 119 |
| AAGCGCT | 32  | GGGGAGG | 118 | 119 |
| AAGCGGA | 32  | GTAAAAT | 118 | 119 |
| AAGCGGC | 22  | GTACATG | 118 | 119 |
| AAGCGGG | 29  | TAAAAGA | 473 | 119 |
| AAGCGGT | 36  | TAAAGCA | 118 | 119 |
| AAGCGTA | 14  | TATTCAA | 118 | 119 |
| AAGCGTC | 25  | TCAAAC  | 237 | 119 |

|         |     |         |     |     |
|---------|-----|---------|-----|-----|
| AAGCGTG | 29  | TCACTTT | 118 | 119 |
| AAGCGTT | 47  | TCATCTC | 118 | 119 |
| AAGCTAA | 137 | TCTTTTA | 118 | 119 |
| AAGCTAC | 51  | TGAATTT | 355 | 119 |
| AAGCTAG | 108 | TGATATA | 118 | 119 |
| AAGCTAT | 69  | TGCATGT | 118 | 119 |
| AAGCTCA | 61  | TTCAAAC | 118 | 119 |
| AAGCTCC | 40  | TTTTCCA | 118 | 119 |
| AAGCTCG | 43  | AAAATAC | 118 | 115 |
| AAGCTCT | 69  | AAACTGT | 118 | 115 |
| AAGCTGA | 47  | AAATATC | 118 | 115 |
| AAGCTGC | 47  | AACTAAT | 355 | 115 |
| AAGCTGG | 36  | AACTAGT | 118 | 115 |
| AAGCTGT | 40  | ACAACCT | 118 | 115 |
| AAGCTTA | 61  | AGCAAAG | 118 | 115 |
| AAGCTTC | 69  | AGCAAGC | 118 | 115 |
| AAGCTTG | 72  | AGTAAAA | 237 | 115 |
| AAGCTTT | 90  | AGTTTCT | 118 | 115 |
| AAGGAAA | 126 | ATAACAA | 237 | 115 |
| AAGGAAC | 32  | ATCCATT | 237 | 115 |
| AAGGAAG | 87  | ATCTTAT | 237 | 115 |
| AAGGAAT | 54  | ATGATAA | 237 | 115 |
| AAGGACA | 29  | ATGTTGA | 118 | 115 |
| AAGGACC | 43  | CAATATA | 118 | 115 |
| AAGGACG | 51  | CCCGCCC | 355 | 115 |
| AAGGACT | 22  | CCGCCCC | 237 | 115 |
| AAGGAGA | 72  | CCTCTTC | 118 | 115 |
| AAGGAGC | 83  | CTTATAT | 237 | 115 |
| AAGGAGG | 87  | CTTCAAA | 118 | 115 |
| AAGGAGT | 87  | CTTCCCT | 237 | 115 |
| AAGGATA | 72  | CTTCTCC | 118 | 115 |
| AAGGATC | 58  | CTTGTTG | 118 | 115 |
| AAGGATG | 72  | GAAATAT | 118 | 115 |
| AAGGATT | 61  | GCTTTTG | 118 | 115 |
| AAGGCAA | 58  | GGAGAGA | 118 | 115 |
| AAGGCAC | 40  | GGCCGGC | 118 | 115 |
| AAGGCAG | 51  | GTTTCAA | 118 | 115 |
| AAGGCAT | 72  | GTTTTCT | 118 | 115 |
| AAGGCCA | 51  | TAAATAG | 237 | 115 |
| AAGGCCC | 43  | TAAGAAA | 118 | 115 |
| AAGGCCG | 43  | TAGAATA | 237 | 115 |
| AAGGCCT | 51  | TAGAGAG | 118 | 115 |
| AAGGCGA | 51  | TCAACAT | 118 | 115 |
| AAGGCGC | 32  | TCATATT | 118 | 115 |
| AAGGCGG | 29  | TCCAATT | 237 | 115 |
| AAGGCGT | 18  | TCCATGT | 118 | 115 |
| AAGGCTA | 79  | TCCTTTG | 118 | 115 |
| AAGGCTC | 51  | TGACAAA | 118 | 115 |
| AAGGCTG | 47  | TTATTAA | 118 | 115 |
| AAGGCTT | 58  | TTTAATG | 118 | 115 |
| AAGGGAA | 115 | TTTATAC | 118 | 115 |
| AAGGGAC | 61  | TTTGTTA | 118 | 115 |

|          |     |         |     |     |
|----------|-----|---------|-----|-----|
| AAGGGAG  | 83  | TTTTAAG | 237 | 115 |
| AAGGGAT  | 36  | AAAACGT | 118 | 112 |
| AAGGGCA  | 69  | AAATACT | 118 | 112 |
| AAGGGCC  | 40  | AAATGAC | 118 | 112 |
| AAGGGCG  | 43  | AACCCTA | 355 | 112 |
| AAGGGCT  | 43  | AACTCTT | 118 | 112 |
| AAGGGGA  | 61  | AACTTAT | 118 | 112 |
| AAGGGGC  | 36  | AAGAACA | 118 | 112 |
| AAGGGGG  | 87  | AAGAGAT | 237 | 112 |
| AAGGGGT  | 43  | AATACAT | 118 | 112 |
| AAGGGTA  | 61  | AATCAAT | 118 | 112 |
| AAGGGTA  | 61  | ACAACAT | 118 | 112 |
| AAGGGTC  | 51  | ACAGAAA | 237 | 112 |
| AAGGGTT  | 51  | ACTAATT | 237 | 112 |
| AAGGTAA  | 90  | ACTATAT | 237 | 112 |
| AAGGTAC  | 43  | ACTCTCT | 237 | 112 |
| AAGGTAG  | 32  | AGAAACT | 355 | 112 |
| AAGGTAT  | 69  | AGAGCAA | 118 | 112 |
| AAGGTCA  | 43  | AGCTTTG | 118 | 112 |
| AAGGTCC  | 40  | AGTATAA | 118 | 112 |
| AAGGTCCG | 43  | AGTTAAA | 118 | 112 |
| AAGGTCT  | 43  | ATCATAA | 118 | 112 |
| AAGGTGA  | 94  | ATGTTTC | 118 | 112 |
| AAGGTGC  | 29  | ATTATGT | 118 | 112 |
| AAGGTGG  | 65  | CAATAAT | 355 | 112 |
| AAGGTGT  | 54  | CAATTAT | 118 | 112 |
| AAGGTTA  | 47  | CAGCCGC | 118 | 112 |
| AAGGTTC  | 61  | CCCAAAA | 118 | 112 |
| AAGGTTG  | 79  | CCCCCTC | 118 | 112 |
| AAGGTTT  | 87  | CGATCGA | 118 | 112 |
| AAGTAAA  | 105 | CTGTTTT | 118 | 112 |
| AAGTAAC  | 36  | CTTTTGC | 118 | 112 |
| AAGTAAG  | 36  | GCAAAGA | 118 | 112 |
| AAGTAAT  | 47  | GCCGCCA | 237 | 112 |
| AAGTACA  | 54  | GCTATAA | 118 | 112 |
| AAGTACC  | 40  | GTACGTA | 237 | 112 |
| AAGTACG  | 18  | GTGCATT | 118 | 112 |
| AAGTACT  | 76  | TATACTA | 237 | 112 |
| AAGTAGA  | 54  | TCATGTT | 118 | 112 |
| AAGTAGC  | 43  | TCCATTT | 118 | 112 |
| AAGTAGG  | 65  | TCCTTCC | 355 | 112 |
| AAGTAGT  | 65  | TCTCCAA | 118 | 112 |
| AAGTATA  | 105 | TGCAAAA | 118 | 112 |
| AAGTATC  | 65  | TGGTGCC | 118 | 112 |
| AAGTATG  | 69  | TTATCAT | 118 | 112 |
| AAGTATT  | 101 | TTATGCA | 237 | 112 |
| AAGTCAA  | 87  | TTGCTTG | 118 | 112 |
| AAGTCAC  | 47  | TTGGATT | 118 | 112 |
| AAGTCAG  | 47  | TTTAAAG | 118 | 112 |
| AAGTCAT  | 61  | TTTCTAG | 118 | 112 |
| AAGTCCA  | 54  | TTTTATC | 118 | 112 |
| AAGTCCC  | 43  | TTTTCTG | 237 | 112 |

|          |     |         |     |     |
|----------|-----|---------|-----|-----|
| AAGTCCG  | 22  | AAACTCA | 118 | 108 |
| AAGTCCT  | 29  | AAAGATA | 118 | 108 |
| AAGTCGA  | 40  | AACTTTG | 118 | 108 |
| AAGTCGC  | 11  | AAGCTAG | 118 | 108 |
| AAGTCGG  | 36  | AATGATA | 118 | 108 |
| AAGTCGT  | 40  | ACATGCT | 118 | 108 |
| AAGTCTA  | 58  | ACTTGCA | 118 | 108 |
| AAGTCTC  | 36  | AGAGATT | 118 | 108 |
| AAGTCTG  | 40  | AGTATAT | 118 | 108 |
| AAGTCTT  | 79  | ATAACAT | 237 | 108 |
| AAGTGAA  | 101 | ATACAAT | 237 | 108 |
| AAGTGAC  | 61  | ATACTAT | 118 | 108 |
| AAGTGAG  | 43  | ATATACT | 118 | 108 |
| AAGTGAT  | 72  | ATATAGC | 237 | 108 |
| AAGTGCA  | 101 | ATCACCA | 355 | 108 |
| AAGTGCA  | 101 | ATCTGAT | 118 | 108 |
| AAGTGCC  | 25  | ATGATCA | 118 | 108 |
| AAGTGCG  | 25  | ATTATCT | 118 | 108 |
| AAGTGGA  | 69  | ATTCTCT | 237 | 108 |
| AAGTGGC  | 43  | CATCAAA | 237 | 108 |
| AAGTGGG  | 61  | CATCCAA | 118 | 108 |
| AAGTGGT  | 90  | CCAATCC | 118 | 108 |
| AAGTGTA  | 61  | CCATCCA | 118 | 108 |
| AAGTGTC  | 36  | CCATGCA | 237 | 108 |
| AAGTG TG | 54  | CCTTTGC | 118 | 108 |
| AAGTGTT  | 79  | GAAAAGG | 118 | 108 |
| AAGTTAA  | 83  | GAAAGAG | 237 | 108 |
| AAGTTAC  | 43  | GAGCAGC | 237 | 108 |
| AAGTTAG  | 61  | GAGGTGG | 118 | 108 |
| AAGTTAT  | 61  | GATTGAT | 118 | 108 |
| AAGTTCA  | 72  | GCCGCGC | 118 | 108 |
| AAGTTCC  | 32  | GTGTCTC | 118 | 108 |
| AAGTTCG  | 29  | GTTATTT | 118 | 108 |
| AAGTTCT  | 54  | TAAATTC | 118 | 108 |
| AAGTTGA  | 65  | TACAATA | 237 | 108 |
| AAGTTGC  | 72  | TAGTATA | 118 | 108 |
| AAGTTGG  | 65  | TATGATA | 237 | 108 |
| AAGTTGT  | 130 | TCAATAA | 118 | 108 |
| AAGTTTA  | 141 | TCATCAC | 118 | 108 |
| AAGTTTC  | 65  | TCCTTTC | 118 | 108 |
| AAGTTTG  | 119 | TGAATTA | 118 | 108 |
| AAGTTTT  | 130 | TGATAAA | 118 | 108 |
| AATAAAA  | 386 | TGCACAC | 118 | 108 |
| AATAAAC  | 126 | TGCTTCT | 118 | 108 |
| AATAAAG  | 137 | TGGAGCT | 118 | 108 |
| AATAAAT  | 321 | TGTATAA | 118 | 108 |
| AATAACA  | 141 | TGTTTCA | 118 | 108 |
| AATAACC  | 69  | TGTTTCC | 237 | 108 |
| AATAACG  | 22  | TTATTCA | 118 | 108 |
| AATAACT  | 87  | TTTATGA | 237 | 108 |
| AATAAGA  | 94  | AAACCTA | 237 | 105 |
| AATAAGC  | 51  | AACAATT | 118 | 105 |

|         |     |         |     |     |
|---------|-----|---------|-----|-----|
| AATAAGG | 72  | AAGAAGT | 118 | 105 |
| AATAAGT | 119 | AAGTAAA | 118 | 105 |
| AATAATA | 238 | AATAATC | 355 | 105 |
| AATAATC | 105 | AATGATT | 118 | 105 |
| AATAATG | 137 | AATGGAA | 118 | 105 |
| AATAATT | 206 | AATGGAG | 118 | 105 |
| AATACAA | 119 | AATTCTC | 118 | 105 |
| AATACAC | 61  | ACACCAA | 118 | 105 |
| AATACAG | 51  | ACATGAT | 118 | 105 |
| AATACAT | 112 | ACCCAAA | 118 | 105 |
| AATACCA | 94  | ACGAAAA | 118 | 105 |
| AATACCC | 65  | AGAGCTC | 118 | 105 |
| AATACCG | 25  | AGCACAA | 118 | 105 |
| AATACCT | 58  | AGTGTTG | 118 | 105 |
| AATACGA | 22  | ATAGAAT | 118 | 105 |
| AATACGC | 29  | ATCTTCA | 237 | 105 |
| AATACGG | 11  | ATGATTA | 118 | 105 |
| AATACGT | 22  | ATGTGTT | 118 | 105 |
| AATACTA | 105 | ATGTTTA | 118 | 105 |
| AATACTC | 69  | CAACTAA | 118 | 105 |
| AATACTG | 32  | CACACAA | 237 | 105 |
| AATACTT | 83  | CACCTCA | 118 | 105 |
| AATAGAA | 101 | CACCTCA | 118 | 105 |
| AATAGAC | 40  | CACCTCC | 118 | 105 |
| AATAGAG | 87  | CACGTAC | 118 | 105 |
| AATAGAT | 115 | CATGGTT | 118 | 105 |
| AATAGCA | 51  | CCCATCT | 118 | 105 |
| AATAGCC | 51  | CCTCCAA | 118 | 105 |
| AATAGCG | 32  | CCTCCAC | 237 | 105 |
| AATAGCT | 65  | CCTCGCC | 237 | 105 |
| AATAGGA | 65  | CTCGCCG | 237 | 105 |
| AATAGGC | 25  | CTCTGCT | 237 | 105 |
| AATAGGG | 40  | CTCTTCC | 355 | 105 |
| AATAGGT | 43  | CTGTTTG | 118 | 105 |
| AATAGTA | 105 | CTTGCTC | 118 | 105 |
| AATAGTC | 51  | CTTGTGC | 118 | 105 |
| AATAGTG | 69  | GAATTTT | 118 | 105 |
| AATAGTT | 119 | GAGGGAG | 237 | 105 |
| AATATAA | 245 | GATGATA | 118 | 105 |
| AATATAC | 97  | GCATGCC | 237 | 105 |
| AATATAG | 141 | GCTTTCT | 118 | 105 |
| AATATAT | 274 | GGTTTGT | 118 | 105 |
| AATATCA | 97  | TAAAGAT | 118 | 105 |
| AATATCC | 47  | TAAAGTT | 118 | 105 |
| AATATCG | 32  | TATCATT | 118 | 105 |
| AATATCT | 97  | TATTATG | 237 | 105 |
| AATATGA | 133 | TCACAAA | 118 | 105 |
| AATATGC | 65  | TCAGAAA | 118 | 105 |
| AATATGG | 83  | TCATATC | 118 | 105 |
| AATATGT | 144 | TCATTAT | 118 | 105 |
| AATATTA | 166 | TCATTTC | 237 | 105 |
| AATATTC | 69  | TCCTCTA | 118 | 105 |



|         |     |         |     |     |
|---------|-----|---------|-----|-----|
| AATATTG | 101 | TCTTTGG | 118 | 105 |
| AATATTT | 271 | TGATTGA | 237 | 105 |
| AATCAAA | 105 | TGCCGCC | 355 | 105 |
| AATCAAC | 43  | TGGATGA | 118 | 105 |
| AATCAAG | 87  | TGTGTCT | 118 | 105 |
| AATCAAT | 112 | TTAGAAA | 118 | 105 |
| AATCACA | 43  | TTAGTTT | 118 | 105 |
| AATCACC | 61  | TTCCCCT | 118 | 105 |
| AATCACG | 29  | TTGTATA | 118 | 105 |
| AATCACT | 112 | TTGTTGG | 118 | 105 |
| AATCAGA | 58  | AAAGCAC | 237 | 101 |
| AATCAGC | 76  | AAAGGTA | 118 | 101 |
| AATCAGG | 51  | AAATTAG | 118 | 101 |
| AATCAGT | 43  | AAATTGA | 118 | 101 |
| AATCATA | 76  | AACCTAT | 118 | 101 |
| AATCATC | 90  | AACTATA | 237 | 101 |
| AATCATG | 112 | AAGCGAA | 118 | 101 |
| AATCATT | 126 | AAGTATT | 118 | 101 |
| AATCCAA | 61  | AATCCTA | 237 | 101 |
| AATCCAC | 97  | ACACAAG | 118 | 101 |
| AATCCAG | 94  | ACCAACT | 118 | 101 |
| AATCCAT | 133 | ACCTATA | 237 | 101 |
| AATCCCA | 79  | ACTTATA | 118 | 101 |
| AATCCCC | 40  | ACTTATA | 118 | 101 |
| AATCCCG | 22  | ACTTTTA | 355 | 101 |
| AATCCCT | 61  | AGAATAT | 118 | 101 |
| AATCCGA | 32  | AGAGCCA | 118 | 101 |
| AATCCGC | 32  | AGAGCCA | 118 | 101 |
| AATCCGG | 40  | AGATTAT | 237 | 101 |
| AATCCGT | 51  | ATAGTTT | 118 | 101 |
| AATCCTA | 101 | ATGAATT | 237 | 101 |
| AATCCTC | 87  | ATTGGTT | 118 | 101 |
| AATCCTG | 32  | ATTTGTG | 118 | 101 |
| AATCCTT | 72  | ATTTTCC | 118 | 101 |
| AATCGAA | 36  | CAAGTTT | 118 | 101 |
| AATCGAC | 36  | CAATTCA | 118 | 101 |
| AATCGAG | 43  | CAATTTA | 118 | 101 |
| AATCGAT | 47  | CACCACT | 118 | 101 |
| AATCGCA | 58  | CACTCTC | 237 | 101 |
| AATCGCC | 40  | CAGCAAC | 237 | 101 |
| AATCGCG | 14  | CAGCCAA | 237 | 101 |
| AATCGCT | 22  | CATACAT | 118 | 101 |
| AATCGGA | 25  | CATCTCA | 118 | 101 |
| AATCGGC | 90  | CAAACC  | 473 | 101 |
| AATCGGG | 29  | CCAACCC | 118 | 101 |
| AATCGGT | 40  | CCACCCC | 118 | 101 |
| AATCGTA | 25  | CCATCAC | 118 | 101 |
| AATCGTC | 14  | CCATCTC | 237 | 101 |
| AATCGTG | 32  | CCATCTG | 118 | 101 |
| AATCGTT | 32  | CCCTCCC | 237 | 101 |
| AATCTAA | 137 | CCTCCCT | 237 | 101 |
| AATCTAC | 69  | CGCCACC | 118 | 101 |

|         |     |         |     |     |
|---------|-----|---------|-----|-----|
| AATCTAG | 123 | CGGCTGC | 118 | 101 |
| AATCTAT | 65  | CGTGGAG | 118 | 101 |
| AATCTCA | 69  | CTCAAAA | 118 | 101 |
| AATCTCC | 69  | CTTCTAA | 118 | 101 |
| AATCTCG | 40  | CTTTCCA | 118 | 101 |
| AATCTCT | 101 | GATTTGG | 118 | 101 |
| AATCTGA | 54  | GCAGCAA | 118 | 101 |
| AATCTGC | 29  | GCTCTGC | 237 | 101 |
| AATCTGG | 40  | GCTTTGT | 118 | 101 |
| AATCTGT | 61  | GGTTTTT | 118 | 101 |
| AATCTTA | 87  | GTGCTCT | 118 | 101 |
| AATCTTC | 79  | TAACTTT | 118 | 101 |
| AATCTTG | 105 | TAGATAT | 118 | 101 |
| AATCTTT | 170 | TAGTTTA | 118 | 101 |
| AATGAAA | 133 | TATTGAA | 237 | 101 |
| AATGAAC | 61  | TCCAATC | 237 | 101 |
| AATGAAG | 97  | TCCCCAC | 118 | 101 |
| AATGAAT | 105 | TCCTTGC | 118 | 101 |
| AATGACA | 87  | TCTACAT | 118 | 101 |
| AATGACC | 47  | TGCACCA | 237 | 101 |
| AATGACG | 32  | TGCTCTC | 118 | 101 |
| AATGACT | 97  | TGGACTT | 118 | 101 |
| AATGAGA | 54  | TGGTGTT | 118 | 101 |
| AATGAGC | 51  | TTATTTT | 118 | 101 |
| AATGAGG | 25  | TTCCAAG | 118 | 101 |
| AATGAGT | 47  | TTCCCTC | 237 | 101 |
| AATGATA | 108 | TTCTGTT | 355 | 101 |
| AATGATC | 65  | TTGTCTA | 118 | 101 |
| AATGATG | 101 | TTTAAGA | 118 | 101 |
| AATGATT | 105 | TTTAATC | 118 | 101 |
| AATGCAA | 101 | TTTACTT | 118 | 101 |
| AATGCAC | 94  | TTTGAAC | 118 | 101 |
| AATGCAG | 51  | AAACATC | 118 | 97  |
| AATGCAT | 101 | AAAGGAA | 355 | 97  |
| AATGCCA | 72  | AAATACC | 118 | 97  |
| AATGCCC | 25  | AAATGTG | 118 | 97  |
| AATGCCG | 32  | AACACCA | 118 | 97  |
| AATGCCT | 51  | AACTACT | 118 | 97  |
| AATGCGA | 43  | AAGAAAC | 118 | 97  |
| AATGCGA | 43  | AATATAC | 237 | 97  |
| AATGCGC | 25  | AATCCAC | 118 | 97  |
| AATGCGT | 47  | AATTTGG | 118 | 97  |
| AATGCTA | 51  | ACCACAT | 118 | 97  |
| AATGCTC | 72  | AGATAGA | 118 | 97  |
| AATGCTG | 54  | ATAAATC | 118 | 97  |
| AATGCTT | 108 | ATAGATT | 118 | 97  |
| AATGGAA | 105 | ATATGGT | 118 | 97  |
| AATGGAC | 43  | ATCCACA | 118 | 97  |
| AATGGAG | 105 | ATCCAGA | 118 | 97  |
| AATGGAT | 87  | ATCTTTG | 118 | 97  |
| AATGGCA | 32  | ATTATGA | 118 | 97  |
| AATGGCC | 29  | ATTGATC | 118 | 97  |

|           |     |          |     |    |
|-----------|-----|----------|-----|----|
| AATGGCG   | 18  | ATTTGGC  | 237 | 97 |
| AATGGCT   | 40  | CAAAGCA  | 237 | 97 |
| AATGGGA   | 94  | CAAAGCA  | 237 | 97 |
| AATGGGC   | 22  | CAACCCA  | 118 | 97 |
| AATGGGG   | 43  | CAGCCAG  | 118 | 97 |
| AATGGGT   | 54  | CATTTGC  | 118 | 97 |
| AATGGTA   | 54  | CCAACGG  | 118 | 97 |
| AATGGTC   | 47  | CCATTTT  | 118 | 97 |
| AATGGTG   | 36  | CCCACCA  | 118 | 97 |
| AATGGTT   | 108 | CCCGCGC  | 237 | 97 |
| AATGTAA   | 79  | CCCTAGC  | 237 | 97 |
| AATGTAC   | 54  | CCTATAA  | 118 | 97 |
| AATGTAG   | 47  | CCTCATC  | 118 | 97 |
| AATGTAT   | 137 | CCTCCCA  | 118 | 97 |
| AATGTCA   | 65  | CGGCCCA  | 237 | 97 |
| AATGTCC   | 25  | CGTCCGC  | 118 | 97 |
| AATGTCCG  | 22  | CTCACTC  | 355 | 97 |
| AATGTCT   | 51  | CTCCCCT  | 237 | 97 |
| AATGTGA   | 76  | CTCGCTC  | 118 | 97 |
| AATGTGC   | 58  | GAAAACC  | 118 | 97 |
| AATGTGG   | 40  | GAAACTG  | 118 | 97 |
| AATGTGT   | 79  | GATCGAG  | 118 | 97 |
| AATGTTA   | 112 | GCAAACCT | 118 | 97 |
| AATGTTC   | 76  | GCATTTA  | 118 | 97 |
| AATGTTG   | 141 | GCCCGCC  | 237 | 97 |
| AATGTTT   | 137 | GCGCGCC  | 118 | 97 |
| AATTA AAA | 220 | GCTCCCA  | 118 | 97 |
| AATTAAC   | 69  | GGAAGAG  | 237 | 97 |
| AATTAAG   | 72  | GGAGAGC  | 118 | 97 |
| AATTAAT   | 173 | GTCTTGT  | 118 | 97 |
| AATTACA   | 97  | GTGACAA  | 118 | 97 |
| AATTACC   | 54  | GTTGGAT  | 237 | 97 |
| AATTACG   | 14  | GTTGTTT  | 118 | 97 |
| AATTACT   | 94  | TAATATG  | 118 | 97 |
| AATTAGA   | 87  | TAGAAAC  | 355 | 97 |
| AATTAGC   | 61  | TGCCGAG  | 118 | 97 |
| AATTAGG   | 90  | TGCTTTA  | 118 | 97 |
| AATTAGT   | 79  | TGGAGAG  | 237 | 97 |
| AATTATA   | 213 | TGGATCT  | 237 | 97 |
| AATTATC   | 87  | TTAAAGT  | 118 | 97 |
| AATTATG   | 148 | TTATAGT  | 118 | 97 |
| AATTATT   | 238 | TTATTGA  | 118 | 97 |
| AATTCAA   | 155 | TTCCCCA  | 118 | 97 |
| AATTCAA   | 155 | TTCGGTT  | 118 | 97 |
| AATTCAC   | 90  | TTGATCG  | 118 | 97 |
| AATTCAG   | 90  | TTGCTCC  | 118 | 97 |
| AATTC CA  | 87  | TTGGATC  | 355 | 97 |
| AATTC CC  | 47  | TTGTGGA  | 118 | 97 |
| AATTC CG  | 14  | TTTAAAC  | 118 | 97 |
| AATTC CT  | 87  | TTTATCC  | 355 | 97 |
| AATTC GA  | 58  | TTTCAAG  | 118 | 97 |
| AATTC GC  | 22  | TTTCCAC  | 237 | 97 |

|         |     |         |     |    |
|---------|-----|---------|-----|----|
| AATTCGG | 29  | TTTGTGC | 118 | 97 |
| AATTCGT | 51  | TTTGTGG | 237 | 97 |
| AATTCTA | 101 | AAACCCT | 237 | 94 |
| AATTCTC | 105 | AACAAAG | 118 | 94 |
| AATTCTG | 40  | AATTGAA | 118 | 94 |
| AATTCTT | 141 | ACATAGA | 118 | 94 |
| AATTGAA | 94  | ACCAGCT | 118 | 94 |
| AATTGAC | 94  | ACCCTAG | 355 | 94 |
| AATTGAG | 83  | ACTCCAA | 355 | 94 |
| AATTGAT | 69  | ACTTTTG | 118 | 94 |
| AATTGCA | 83  | AGAACAA | 355 | 94 |
| AATTGCC | 69  | AGAACTA | 118 | 94 |
| AATTGCG | 25  | AGACAAA | 118 | 94 |
| AATTGCT | 69  | AGACAAA | 118 | 94 |
| AATTGGA | 130 | AGATAAT | 118 | 94 |
| AATTGGC | 36  | AGCTCAT | 118 | 94 |
| AATTGGG | 25  | AGCTTGT | 237 | 94 |
| AATTGGT | 69  | AGGGAAA | 118 | 94 |
| AATTGTA | 79  | AGTAATA | 118 | 94 |
| AATTGTC | 61  | ATCAAAC | 118 | 94 |
| AATTGTG | 83  | ATGTTTG | 237 | 94 |
| AATTGTT | 141 | CAAATGA | 118 | 94 |
| AATTTAA | 220 | CAACTCC | 237 | 94 |
| AATTTAC | 76  | CACAAGA | 118 | 94 |
| AATTTAG | 112 | CACCCCC | 118 | 94 |
| AATTTAT | 198 | CATCAAC | 118 | 94 |
| AATTTCA | 141 | CCCATCC | 355 | 94 |
| AATTTCC | 58  | CCCGGCC | 118 | 94 |
| AATTTCG | 54  | CCCTTCC | 355 | 94 |
| AATTTCT | 170 | CCGAGCC | 118 | 94 |
| AATTTGA | 180 | CCTCTGC | 118 | 94 |
| AATTTGC | 83  | CCTTTCA | 118 | 94 |
| AATTTGG | 97  | CGGCCGG | 237 | 94 |
| AATTTGT | 148 | CGTCTTC | 237 | 94 |
| AATTTTA | 213 | CTACAAA | 118 | 94 |
| AATTTTC | 155 | CTACTAG | 118 | 94 |
| AATTTTG | 148 | CTATTAA | 118 | 94 |
| AATTTTT | 245 | CTTCGTT | 118 | 94 |
| ACAAAAA | 256 | CTTTGAA | 118 | 94 |
| ACAAAAC | 137 | GAAACAT | 118 | 94 |
| ACAAAAG | 101 | GAATAAT | 237 | 94 |
| ACAAAAT | 155 | GAGCATA | 118 | 94 |
| ACAAACA | 202 | GAGCCAG | 237 | 94 |
| ACAAACC | 83  | GATTTGC | 118 | 94 |
| ACAAACG | 36  | GCAAATT | 118 | 94 |
| ACAAACT | 87  | GCAACGC | 118 | 94 |
| ACAAAGA | 130 | GCCTCTC | 237 | 94 |
| ACAAAGC | 54  | GGCGGCC | 237 | 94 |
| ACAAAGG | 69  | GGGCCCA | 118 | 94 |
| ACAAAGT | 79  | GGTAAAA | 118 | 94 |
| ACAAATA | 152 | GTAAATA | 118 | 94 |
| ACAAATC | 130 | GTCTTCC | 118 | 94 |

|         |     |         |     |    |
|---------|-----|---------|-----|----|
| ACAAATG | 79  | GTGGTTG | 118 | 94 |
| ACAAATT | 137 | GTGTAAA | 118 | 94 |
| ACAACAA | 170 | GTTATAT | 118 | 94 |
| ACAACAC | 90  | TAAATCT | 237 | 94 |
| ACAACAG | 94  | TAAGATA | 118 | 94 |
| ACAACAT | 112 | TAATTGC | 118 | 94 |
| ACAACCA | 79  | TACTCAT | 118 | 94 |
| ACAACCC | 58  | TCCAAAC | 118 | 94 |
| ACAACCG | 40  | TCCCTCA | 118 | 94 |
| ACAACCT | 87  | TCCTCCG | 237 | 94 |
| ACAACGA | 40  | TCTCATA | 118 | 94 |
| ACAACGC | 14  | TCTCGCC | 237 | 94 |
| ACAACGG | 43  | TCTGTTC | 355 | 94 |
| ACAACGT | 54  | TCTTGGC | 118 | 94 |
| ACAACTA | 69  | TGATCTC | 118 | 94 |
| ACAACTC | 54  | TGATCTT | 118 | 94 |
| ACAACTG | 32  | TGCCTCT | 237 | 94 |
| ACAACTT | 115 | TGCTTCC | 237 | 94 |
| ACAAGAA | 126 | TGCTTGA | 118 | 94 |
| ACAAGAC | 40  | TGGAAGA | 237 | 94 |
| ACAAGAG | 94  | TGGATTT | 237 | 94 |
| ACAAGAT | 76  | TGGTTTC | 118 | 94 |
| ACAAGCA | 90  | TGTGGTG | 237 | 94 |
| ACAAGCC | 87  | TGTTGAA | 118 | 94 |
| ACAAGCG | 47  | TTATACT | 118 | 94 |
| ACAAGCT | 54  | TTCCATC | 118 | 94 |
| ACAAGGA | 83  | TTCTCAT | 118 | 94 |
| ACAAGGC | 65  | TTCTTGG | 118 | 94 |
| ACAAGGG | 58  | TTGGCAA | 118 | 94 |
| ACAAGGT | 47  | TTTCTGA | 237 | 94 |
| ACAAGTA | 72  | AAAAGCC | 118 | 90 |
| ACAAGTC | 54  | AAACCCA | 118 | 90 |
| ACAAGTG | 130 | AAAGTTA | 118 | 90 |
| ACAAGTT | 87  | AACAATC | 118 | 90 |
| ACAATAA | 119 | AACCAAC | 118 | 90 |
| ACAATAC | 79  | AAGAGGC | 118 | 90 |
| ACAATAG | 40  | AAGAGGT | 118 | 90 |
| ACAATAT | 119 | AAGATAA | 118 | 90 |
| ACAATCA | 65  | AAGATAA | 118 | 90 |
| ACAATCC | 87  | AAGCACA | 118 | 90 |
| ACAATCG | 25  | AAGGTAA | 118 | 90 |
| ACAATCT | 51  | AATCGGC | 118 | 90 |
| ACAATGA | 65  | AATTCAG | 118 | 90 |
| ACAATGC | 43  | ACAACAC | 118 | 90 |
| ACAATGG | 29  | ACAAGCA | 118 | 90 |
| ACAATGT | 79  | ACTGCTC | 118 | 90 |
| ACAATTA | 97  | AGAGGGA | 237 | 90 |
| ACAATTC | 69  | AGCATAT | 118 | 90 |
| ACAATTG | 72  | AGGGAGA | 118 | 90 |
| ACAATTT | 105 | AGGTAAA | 237 | 90 |
| ACACAAA | 119 | AGTTAGT | 118 | 90 |
| ACACAAC | 94  | ATAAGAT | 118 | 90 |

|          |     |         |     |    |
|----------|-----|---------|-----|----|
| ACACAAG  | 101 | ATACATT | 118 | 90 |
| ACACAAT  | 83  | ATATGCT | 237 | 90 |
| ACACACA  | 162 | ATCACAT | 237 | 90 |
| ACACACA  | 162 | ATGATCT | 118 | 90 |
| acacacc  | 0   | CAAGCCC | 118 | 90 |
| ACACACG  | 58  | CAAGCTA | 237 | 90 |
| ACACACT  | 47  | CAATCTC | 118 | 90 |
| ACACAGA  | 32  | CACAACA | 118 | 90 |
| ACACAGC  | 87  | CAGAAGC | 118 | 90 |
| ACACAGG  | 36  | CATCCTT | 118 | 90 |
| ACACAGT  | 32  | CCACTTG | 118 | 90 |
| ACACATA  | 101 | CCCACAT | 118 | 90 |
| ACACATC  | 123 | CCCCATC | 237 | 90 |
| ACACATG  | 112 | CCGTCCG | 118 | 90 |
| ACACATT  | 101 | CCTAGCT | 118 | 90 |
| ACACCAA  | 105 | CCTCCTT | 355 | 90 |
| ACACCAC  | 61  | CGACGAC | 118 | 90 |
| ACACCAG  | 47  | CGAGCCA | 237 | 90 |
| ACACCAT  | 83  | CGGCCAC | 237 | 90 |
| ACACCCA  | 32  | CTAACTT | 118 | 90 |
| ACACCCC  | 47  | CTCCCAA | 118 | 90 |
| ACACCCG  | 22  | CTTTTAA | 118 | 90 |
| ACACCCCT | 72  | GAATTTT | 118 | 90 |
| ACACCGA  | 43  | GCATAAA | 118 | 90 |
| ACACCGC  | 40  | GCCCAAG | 118 | 90 |
| ACACCGG  | 25  | GCCCCCG | 118 | 90 |
| ACACCGT  | 43  | GGAATAA | 118 | 90 |
| ACACCTA  | 72  | GGATGAA | 118 | 90 |
| ACACCTC  | 76  | GGCCACA | 118 | 90 |
| ACACCTG  | 43  | GGCTATA | 118 | 90 |
| ACACCTT  | 43  | GTTCTTG | 118 | 90 |
| ACACGAA  | 54  | GTTTCTA | 118 | 90 |
| ACACGAC  | 54  | GTTTGGC | 118 | 90 |
| ACACGAG  | 43  | TAATATC | 118 | 90 |
| ACACGAT  | 14  | TACTTGC | 118 | 90 |
| ACACGCA  | 47  | TAGACTA | 118 | 90 |
| ACACGCC  | 36  | TAGATAA | 118 | 90 |
| ACACGCG  | 43  | TAGCTAA | 118 | 90 |
| ACACGCT  | 47  | TAGTAGA | 118 | 90 |
| ACACGGA  | 40  | TAGTTTC | 237 | 90 |
| ACACGGC  | 43  | TATCCAT | 355 | 90 |
| ACACGGG  | 14  | TATGTTC | 118 | 90 |
| ACACGGT  | 61  | TATTGGT | 118 | 90 |
| ACACGTA  | 43  | TCACTCT | 237 | 90 |
| ACACGTC  | 51  | TCCCTTC | 118 | 90 |
| ACACGTG  | 72  | TCTTCAC | 118 | 90 |
| ACACGTT  | 32  | TGCAACG | 118 | 90 |
| ACACTAA  | 76  | TGCTTAT | 118 | 90 |
| ACACTAC  | 43  | TGGATCC | 118 | 90 |
| ACACTAG  | 54  | TGGCATT | 118 | 90 |
| ACACTAT  | 72  | TGTGCTT | 118 | 90 |
| ACACTCA  | 54  | TGTGTGC | 118 | 90 |

|         |     |         |     |    |
|---------|-----|---------|-----|----|
| ACACTCC | 54  | TTATGAT | 237 | 90 |
| ACACTCG | 36  | TTGCAAG | 118 | 90 |
| ACACTCT | 36  | TTGGTCT | 118 | 90 |
| ACACTGA | 29  | AAACTAT | 355 | 87 |
| ACACTGC | 43  | AACTATT | 118 | 87 |
| ACACTGG | 54  | AATAACT | 118 | 87 |
| ACACTGT | 72  | AATAGAG | 118 | 87 |
| ACACTTA | 65  | AATGACA | 118 | 87 |
| ACACTTC | 40  | ACAAACT | 237 | 87 |
| ACACTTG | 51  | ACCAACC | 118 | 87 |
| ACACTTT | 65  | ACCATCT | 118 | 87 |
| ACAGAAA | 112 | ACTCATC | 118 | 87 |
| ACAGAAC | 36  | ACTCTTC | 237 | 87 |
| ACAGAAG | 76  | ACTTCTA | 118 | 87 |
| ACAGAAT | 51  | AGAGAGT | 118 | 87 |
| ACAGACA | 47  | AGATTTT | 118 | 87 |
| ACAGACC | 25  | AGCACAC | 118 | 87 |
| ACAGACG | 32  | AGCCAAT | 118 | 87 |
| ACAGACT | 58  | AGCCGCA | 237 | 87 |
| ACAGAGA | 54  | AGCTAAT | 118 | 87 |
| ACAGAGC | 14  | AGGCAGC | 118 | 87 |
| ACAGAGG | 47  | ATCCAAT | 118 | 87 |
| ACAGAGT | 43  | ATGGAGA | 118 | 87 |
| ACAGATA | 51  | ATGTACA | 237 | 87 |
| ACAGATC | 36  | ATTCAAC | 118 | 87 |
| ACAGATG | 51  | ATTTCTG | 355 | 87 |
| ACAGATT | 72  | CAAACAG | 118 | 87 |
| ACAGCAA | 51  | CAAGCAG | 118 | 87 |
| ACAGCAC | 61  | CACCATC | 118 | 87 |
| ACAGCAG | 51  | CACCGTC | 118 | 87 |
| ACAGCAT | 54  | CAGACGA | 118 | 87 |
| ACAGCCA | 90  | CAGACGA | 118 | 87 |
| ACAGCCC | 69  | CATCACC | 118 | 87 |
| ACAGCCG | 51  | CATCATA | 118 | 87 |
| ACAGCCT | 40  | CCAAACT | 118 | 87 |
| ACAGCGA | 32  | CCACAAG | 118 | 87 |
| ACAGCGA | 32  | CCACATG | 237 | 87 |
| ACAGCGC | 32  | CCAGTTT | 118 | 87 |
| ACAGCGG | 25  | CCCCCAC | 118 | 87 |
| ACAGCTA | 61  | CCCCTTC | 237 | 87 |
| ACAGCTC | 47  | CCCTCCA | 237 | 87 |
| ACAGCTG | 22  | CCCTCTT | 118 | 87 |
| ACAGCTT | 61  | CGCCGGC | 118 | 87 |
| ACAGGAA | 43  | CGCCGTC | 237 | 87 |
| ACAGGAC | 40  | CGCCTCC | 118 | 87 |
| ACAGGAG | 43  | CGCCTGC | 118 | 87 |
| ACAGGAT | 25  | CGCGTGC | 118 | 87 |
| ACAGGCA | 32  | CGTGCCG | 118 | 87 |
| ACAGGCC | 36  | CTCCCCA | 355 | 87 |
| ACAGGCG | 43  | CTGCATT | 237 | 87 |
| ACAGGCT | 40  | CTGCTCT | 355 | 87 |
| ACAGGGA | 36  | CTTATCC | 118 | 87 |

|         |     |         |     |    |
|---------|-----|---------|-----|----|
| ACAGGGC | 51  | CTTGGCA | 118 | 87 |
| ACAGGGG | 47  | CTTGGTG | 118 | 87 |
| ACAGGGT | 40  | CTTTGGA | 237 | 87 |
| ACAGGTA | 54  | GAAGATT | 237 | 87 |
| ACAGGTC | 65  | GACCGTT | 118 | 87 |
| ACAGGTG | 22  | GAGCTCA | 118 | 87 |
| ACAGGTT | 43  | GAGGGGG | 118 | 87 |
| ACAGTAA | 36  | GAGTTTG | 118 | 87 |
| ACAGTAC | 54  | GATCATG | 118 | 87 |
| ACAGTAG | 40  | GATGATT | 118 | 87 |
| ACAGTAT | 47  | GCATCAT | 118 | 87 |
| ACAGTCA | 43  | GCCACCT | 118 | 87 |
| ACAGTCC | 83  | GCCACGC | 118 | 87 |
| ACAGTCG | 11  | GCGGAGG | 118 | 87 |
| ACAGTCT | 29  | GCTCCTT | 118 | 87 |
| ACAGTGA | 61  | GCTCTCC | 118 | 87 |
| ACAGTGC | 36  | GGCAGCA | 237 | 87 |
| ACAGTGG | 32  | GGCCGCC | 118 | 87 |
| ACAGTGT | 54  | GGTCTTT | 118 | 87 |
| ACAGTTA | 40  | GGTGGCG | 118 | 87 |
| ACAGTTC | 32  | GGTGTTT | 118 | 87 |
| ACAGTTG | 40  | GTATTAT | 118 | 87 |
| ACAGTTT | 36  | GTCAAAC | 118 | 87 |
| ACATAAA | 144 | GTCCTTG | 118 | 87 |
| ACATAAC | 54  | GTGTGTG | 118 | 87 |
| ACATAAG | 65  | GTTGAAA | 118 | 87 |
| ACATAAT | 94  | GTTTGAA | 118 | 87 |
| ACATACA | 76  | TACTAGT | 118 | 87 |
| ACATACC | 61  | TACTATA | 237 | 87 |
| ACATACG | 29  | TAGCTAC | 118 | 87 |
| ACATACT | 29  | TATAAAG | 237 | 87 |
| ACATAGA | 94  | TATTGAT | 118 | 87 |
| ACATAGC | 32  | TCACCAA | 237 | 87 |
| ACATAGG | 25  | TCCAACC | 237 | 87 |
| ACATAGT | 90  | TCCATCT | 118 | 87 |
| ACATATA | 144 | TCCGTCC | 118 | 87 |
| ACATATC | 58  | TCCTCAC | 237 | 87 |
| ACATATG | 119 | TCCTCGC | 118 | 87 |
| ACATATT | 133 | TCGATCC | 118 | 87 |
| ACATCAA | 87  | TCGGTTT | 118 | 87 |
| ACATCAC | 72  | TCTGCAT | 118 | 87 |
| ACATCAG | 58  | TGAAGTG | 118 | 87 |
| ACATCAT | 69  | TGCACCC | 118 | 87 |
| ACATCCA | 79  | TGCGCGC | 118 | 87 |
| ACATCCC | 76  | TGCTTTC | 118 | 87 |
| ACATCCG | 25  | TGGACCA | 118 | 87 |
| ACATCCT | 79  | TGGCATG | 118 | 87 |
| ACATCGA | 43  | TGTGAAA | 118 | 87 |
| ACATCGC | 22  | TGTTAAT | 118 | 87 |
| ACATCGG | 32  | TTAAGAA | 118 | 87 |
| ACATCGT | 25  | TTAATTG | 118 | 87 |
| ACATCTA | 94  | TTATAAC | 118 | 87 |



|          |     |         |     |    |
|----------|-----|---------|-----|----|
| ACATCTC  | 79  | TTATTGC | 118 | 87 |
| ACATCTG  | 83  | TTCAAAG | 118 | 87 |
| ACATCTT  | 90  | TTGAACC | 118 | 87 |
| ACATGAA  | 90  | TTGGTTA | 118 | 87 |
| ACATGAC  | 79  | TTGTTAA | 118 | 87 |
| ACATGAG  | 79  | TTGTTAA | 118 | 87 |
| ACATGAT  | 105 | TTAACA  | 237 | 87 |
| ACATGCA  | 130 | AAAAGGC | 118 | 83 |
| ACATGCC  | 43  | AAAGAGC | 118 | 83 |
| ACATGCG  | 22  | AACATAG | 118 | 83 |
| ACATGCT  | 108 | AACATCA | 118 | 83 |
| ACATGGA  | 108 | AACATTA | 118 | 83 |
| ACATGGC  | 43  | AACCCAC | 237 | 83 |
| ACATGGG  | 72  | AAGACGA | 118 | 83 |
| ACATGGT  | 79  | AATACTT | 118 | 83 |
| ACATGTA  | 126 | AATATGG | 118 | 83 |
| ACATGTC  | 83  | ACAGTCC | 118 | 83 |
| ACATGTG  | 137 | ACCTAGA | 118 | 83 |
| ACATGTT  | 133 | AGACGAA | 237 | 83 |
| ACATTAA  | 79  | AGATCAT | 118 | 83 |
| ACATTAC  | 61  | AGCTCAG | 118 | 83 |
| ACATTAG  | 47  | AGTAGAA | 237 | 83 |
| ACATTAT  | 54  | AGTTCTC | 118 | 83 |
| ACATTCA  | 61  | ATATTGA | 118 | 83 |
| ACATTCC  | 29  | ATCATT  | 118 | 83 |
| ACATTCCG | 22  | ATCGATC | 118 | 83 |
| ACATTCT  | 72  | ATTGCTT | 118 | 83 |
| ACATTGA  | 51  | CAAGCCA | 118 | 83 |
| ACATTGC  | 18  | CAAGTGG | 118 | 83 |
| ACATTGG  | 54  | CAATTAA | 118 | 83 |
| ACATTGT  | 58  | CAGCAAG | 118 | 83 |
| ACATTTA  | 162 | CATGCTG | 118 | 83 |
| ACATTTTC | 76  | CCACTCT | 118 | 83 |
| ACATTTTG | 105 | CCATAGT | 118 | 83 |
| ACATTTT  | 188 | CCCAATC | 237 | 83 |
| ACCAAAA  | 202 | CCCCACA | 355 | 83 |
| ACCAAAC  | 137 | CCCGTTT | 118 | 83 |
| ACCAAAG  | 87  | CCCTCCG | 355 | 83 |
| ACCAAAT  | 170 | CCGCCCT | 237 | 83 |
| ACCAACA  | 112 | CGAGAAA | 118 | 83 |
| ACCAACC  | 87  | CGCCAC  | 237 | 83 |
| ACCAACG  | 18  | CTATAAT | 118 | 83 |
| ACCAACT  | 101 | CTCCAAT | 355 | 83 |
| ACCAAGA  | 94  | CTCCTGC | 118 | 83 |
| ACCAAGC  | 61  | CTCGCCC | 118 | 83 |
| ACCAAGG  | 51  | CTCGTCC | 118 | 83 |
| ACCAAGT  | 51  | CTGCCCT | 118 | 83 |
| ACCAATA  | 54  | CTTCCCA | 118 | 83 |
| ACCAATC  | 61  | CTTTCAT | 118 | 83 |
| ACCAATG  | 69  | GAAAAGC | 118 | 83 |
| ACCAATT  | 79  | GAAGTTT | 118 | 83 |
| ACCACAA  | 72  | GACCCAA | 237 | 83 |

|         |     |         |     |    |
|---------|-----|---------|-----|----|
| ACCACAC | 65  | GAGCAAG | 118 | 83 |
| ACCACAG | 40  | GATTTCT | 118 | 83 |
| ACCACAT | 97  | GCACGTC | 118 | 83 |
| ACCACCA | 166 | GCATTAT | 118 | 83 |
| ACCACCC | 65  | GCCACTT | 118 | 83 |
| ACCACCG | 72  | GCCAGCT | 237 | 83 |
| ACCACCT | 76  | GCCCATG | 118 | 83 |
| ACCACGA | 43  | GCCCGGC | 118 | 83 |
| ACCACGC | 36  | GCCCTCC | 118 | 83 |
| ACCACGG | 40  | GGAGCCA | 118 | 83 |
| ACCACGT | 29  | GGCATGC | 118 | 83 |
| ACCACTA | 72  | GGCCAAA | 118 | 83 |
| ACCACTC | 65  | GGCCACC | 118 | 83 |
| ACCACTG | 54  | GGCCACG | 237 | 83 |
| ACCACTT | 83  | GGCTGCT | 118 | 83 |
| ACCAGAA | 79  | GTGAGAG | 237 | 83 |
| ACCAGAC | 97  | GTGGTTT | 118 | 83 |
| ACCAGAG | 51  | GTTCTCT | 118 | 83 |
| ACCAGAT | 51  | TAAATCC | 118 | 83 |
| ACCAGCA | 76  | TAACAAT | 118 | 83 |
| ACCAGCC | 61  | TAGTAAT | 118 | 83 |
| ACCAGCG | 18  | TATATGG | 118 | 83 |
| ACCAGCT | 94  | TATCTGA | 118 | 83 |
| ACCAGGA | 29  | TATGCAA | 118 | 83 |
| ACCAGGC | 18  | TATGCTT | 118 | 83 |
| ACCAGGG | 47  | TCACATA | 118 | 83 |
| ACCAGGT | 25  | TCACCAC | 237 | 83 |
| ACCAGTA | 36  | TCACCTA | 118 | 83 |
| ACCAGTC | 40  | TCGCCGC | 355 | 83 |
| ACCAGTG | 51  | TGAGAGA | 355 | 83 |
| ACCAGTT | 47  | TGCAAGC | 237 | 83 |
| ACCATAA | 76  | TGTCAAT | 118 | 83 |
| ACCATAA | 76  | TGTCCAT | 118 | 83 |
| ACCATAC | 36  | TGTCTAG | 118 | 83 |
| ACCATAT | 51  | TGTGGAT | 118 | 83 |
| ACCATCA | 97  | TGTTGCC | 118 | 83 |
| ACCATCC | 43  | TTAGCAA | 118 | 83 |
| ACCATCG | 36  | TTCAAGT | 237 | 83 |
| ACCATCT | 87  | TTGATTG | 118 | 83 |
| ACCATGA | 54  | TTGGGTT | 118 | 83 |
| ACCATGC | 90  | TTGTGTA | 118 | 83 |
| ACCATGG | 76  | TTTCTGG | 237 | 83 |
| ACCATGT | 65  | AACGAAA | 237 | 79 |
| ACCATTA | 40  | AACGAGC | 237 | 79 |
| ACCATTC | 54  | AACTAAC | 237 | 79 |
| ACCATTG | 36  | AACTCCA | 118 | 79 |
| ACCATTT | 101 | AAGAGCA | 118 | 79 |
| ACCCAAA | 105 | AAGCACG | 118 | 79 |
| ACCCAAC | 76  | AATGTAA | 118 | 79 |
| ACCCAAG | 51  | AATGTGT | 118 | 79 |
| ACCCAAT | 79  | ACAATAC | 118 | 79 |
| ACCCACA | 47  | ACATGGT | 118 | 79 |

|         |    |         |     |    |
|---------|----|---------|-----|----|
| ACCCACC | 61 | ACCCAAT | 118 | 79 |
| ACCCACG | 76 | ACCGTTG | 118 | 79 |
| ACCCACT | 43 | ACCTCCC | 118 | 79 |
| ACCCAGA | 29 | ACCTCCT | 118 | 79 |
| ACCCAGC | 32 | ACGTGGA | 118 | 79 |
| ACCCAGG | 22 | ACTAACC | 237 | 79 |
| ACCCAGT | 25 | ACTTGCT | 118 | 79 |
| ACCCATA | 58 | AGATTCT | 118 | 79 |
| ACCCATC | 72 | AGCAACT | 118 | 79 |
| ACCCATG | 65 | AGGCATC | 118 | 79 |
| ACCCATT | 36 | ATACAAG | 118 | 79 |
| ACCCCAA | 61 | ATCAATA | 118 | 79 |
| ACCCCAC | 51 | ATCCATG | 118 | 79 |
| ACCCCAG | 14 | ATCTAGT | 118 | 79 |
| ACCCCAT | 47 | ATGCAAT | 118 | 79 |
| ACCCCCA | 29 | ATTAAAG | 118 | 79 |
| ACCCCCC | 58 | CAAACGA | 237 | 79 |
| ACCCCCG | 47 | CACCCAC | 118 | 79 |
| ACCCCCT | 58 | CAGAAAC | 118 | 79 |
| ACCCCGA | 36 | CATAGAA | 118 | 79 |
| ACCCCGC | 36 | CATTCCC | 118 | 79 |
| ACCCCGG | 29 | CCACGCG | 118 | 79 |
| ACCCCGT | 51 | CCCAAGC | 118 | 79 |
| ACCCCTA | 43 | CCCACGA | 118 | 79 |
| ACCCCTC | 32 | CCCACGA | 118 | 79 |
| ACCCCTG | 58 | CCCCTC  | 118 | 79 |
| ACCCCTT | 54 | CCCTCAC | 118 | 79 |
| ACCCGAA | 22 | CCGTTTT | 118 | 79 |
| ACCCGAC | 94 | CCTAAAA | 118 | 79 |
| ACCCGAG | 32 | CCTTGTG | 118 | 79 |
| ACCCGAT | 29 | CGAGAGA | 118 | 79 |
| ACCCGCA | 29 | CGTCACC | 118 | 79 |
| ACCCGCC | 47 | CGTTTGG | 118 | 79 |
| ACCCGCG | 40 | CTATCAT | 118 | 79 |
| ACCCGCT | 18 | CTCACCA | 237 | 79 |
| ACCCGGA | 25 | CTCCACT | 118 | 79 |
| ACCCGGC | 47 | CTCCAC  | 118 | 79 |
| ACCCGGG | 18 | CTCCTCG | 118 | 79 |
| ACCCGGT | 32 | CTGCAAG | 237 | 79 |
| ACCCGTA | 11 | CTGCTAT | 237 | 79 |
| ACCCGTC | 58 | CTGGTTT | 118 | 79 |
| ACCCGTG | 29 | CTTGCAC | 118 | 79 |
| ACCCGTT | 36 | GAAAGGT | 118 | 79 |
| ACCCTAA | 76 | GAACAAA | 118 | 79 |
| ACCCTAC | 29 | GAACCCT | 118 | 79 |
| ACCCTAG | 94 | GAAGACT | 118 | 79 |
| ACCCTAT | 32 | GAAGCTA | 118 | 79 |
| ACCCTCA | 65 | GAATGAT | 118 | 79 |
| ACCCTCC | 58 | GACCACC | 118 | 79 |
| ACCCTCG | 36 | GAGAGCA | 355 | 79 |
| ACCCTCT | 43 | GATATAG | 118 | 79 |
| ACCCTGA | 4  | GATCGAT | 473 | 79 |

|         |     |         |     |    |
|---------|-----|---------|-----|----|
| ACCCTGA | 4   | GATCTTG | 118 | 79 |
| ACCCTGG | 25  | GCCACAA | 118 | 79 |
| ACCCTGT | 79  | GCCCCTC | 118 | 79 |
| ACCCTTA | 43  | GCCCGCG | 118 | 79 |
| ACCCTTC | 72  | GCCTCCA | 118 | 79 |
| ACCCTTG | 72  | GCCTGCA | 118 | 79 |
| ACCCTTT | 61  | GGAAAGG | 118 | 79 |
| ACCGAAA | 61  | GGAGAAG | 118 | 79 |
| ACCGAAC | 69  | GGATTTT | 118 | 79 |
| ACCGAAG | 18  | GGTAAAG | 118 | 79 |
| ACCGAAT | 22  | GGTGGGG | 118 | 79 |
| ACCGACA | 36  | GTCCGCC | 118 | 79 |
| ACCGACC | 76  | GTCCTCC | 237 | 79 |
| ACCGACG | 40  | GTCGTCT | 237 | 79 |
| ACCGACT | 18  | GTGTATA | 237 | 79 |
| ACCGAGA | 47  | GTTTGCT | 355 | 79 |
| ACCGAGC | 65  | TAATTCT | 118 | 79 |
| ACCGAGG | 65  | TATAACA | 118 | 79 |
| ACCGAGT | 32  | TATAGTA | 118 | 79 |
| ACCGATA | 14  | TCAAAAC | 118 | 79 |
| ACCGATC | 69  | TCACCAT | 118 | 79 |
| ACCGATG | 40  | TCACTCC | 118 | 79 |
| ACCGATT | 43  | TCCACTC | 118 | 79 |
| ACCGCAA | 18  | TCCCATC | 237 | 79 |
| ACCGCAC | 29  | TCCCAT  | 237 | 79 |
| ACCGCAG | 36  | TCCCTCT | 237 | 79 |
| ACCGCAT | 22  | TCCGGCC | 237 | 79 |
| ACCGCCA | 36  | TCTCCTG | 118 | 79 |
| ACCGCCC | 83  | TCTCTGC | 237 | 79 |
| ACCGCCG | 54  | TCTTCCA | 118 | 79 |
| ACCGCCT | 36  | TGCAAGT | 237 | 79 |
| ACCGCGA | 25  | TGCATAG | 118 | 79 |
| ACCGCGC | 47  | TGCTCTA | 118 | 79 |
| ACCGCGG | 40  | TGCTCTG | 237 | 79 |
| ACCGCGT | 29  | TGTCACC | 118 | 79 |
| ACCGCTA | 25  | TGTGCTC | 237 | 79 |
| ACCGCTC | 29  | TTATGTA | 118 | 79 |
| ACCGCTG | 43  | TTCCAAC | 237 | 79 |
| ACCGCTT | 32  | TTGATGG | 118 | 79 |
| ACCGGAA | 32  | TTTCCA  | 118 | 79 |
| ACCGGAC | 170 | TTTCGGT | 118 | 79 |
| ACCGGAG | 29  | AAAAGAC | 118 | 76 |
| ACCGGAT | 40  | AAAGCGA | 118 | 76 |
| ACCGGCA | 51  | AAAGCGA | 118 | 76 |
| ACCGGCC | 58  | AAAGGAT | 118 | 76 |
| ACCGGCG | 36  | AAATCAC | 118 | 76 |
| ACCGGCT | 65  | AAGCCCA | 118 | 76 |
| ACCGGGA | 29  | AAGCCTT | 118 | 76 |
| ACCGGGC | 25  | AAGTACT | 118 | 76 |
| ACCGGGG | 51  | ACAAGAT | 118 | 76 |
| ACCGGGT | 40  | ACACCTC | 118 | 76 |
| ACCGGTA | 29  | ACATACA | 118 | 76 |

|         |     |         |     |    |
|---------|-----|---------|-----|----|
| ACCGGTA | 29  | ACCCAAC | 118 | 76 |
| ACCGGTC | 54  | ACCCACG | 237 | 76 |
| ACCGGTG | 36  | ACCGACC | 118 | 76 |
| ACCGTAA | 18  | ACGACGA | 118 | 76 |
| ACCGTAC | 43  | ACGTGGC | 237 | 76 |
| ACCGTAG | 25  | ACTACTC | 118 | 76 |
| ACCGTAT | 18  | ACTCCAT | 118 | 76 |
| ACCGTCA | 32  | ACTGTAA | 118 | 76 |
| ACCGTCC | 76  | ACTTTGC | 237 | 76 |
| ACCGTCG | 32  | AGACTAA | 118 | 76 |
| ACCGTCT | 43  | AGAGAAC | 118 | 76 |
| ACCGTGA | 22  | AGAGCGA | 118 | 76 |
| ACCGTGC | 36  | AGCACCA | 118 | 76 |
| ACCGTGG | 43  | AGCATGC | 118 | 76 |
| ACCGTGT | 51  | AGCGAGC | 118 | 76 |
| ACCGTTA | 36  | AGCTGGC | 118 | 76 |
| ACCGTTC | 47  | AGTGAAG | 118 | 76 |
| ACCGTTG | 79  | AGTTATA | 118 | 76 |
| ACCGTTT | 32  | ATCCAAC | 118 | 76 |
| ACCTAAA | 65  | ATCTTGC | 118 | 76 |
| ACCTAAC | 47  | ATGCATC | 118 | 76 |
| ACCTAAG | 36  | ATTATGG | 118 | 76 |
| ACCTAAT | 58  | ATTCCCT | 118 | 76 |
| ACCTACA | 54  | CAAAGGA | 118 | 76 |
| ACCTACC | 43  | CAACATC | 118 | 76 |
| ACCTACG | 25  | CAAGCTC | 118 | 76 |
| ACCTACT | 79  | CAATCAC | 118 | 76 |
| ACCTAGA | 83  | CACCAAG | 237 | 76 |
| ACCTAGC | 36  | CACGCAC | 237 | 76 |
| ACCTAGG | 36  | CACTCCA | 237 | 76 |
| ACCTAGT | 51  | CAGCCCA | 118 | 76 |
| ACCTATA | 101 | CATCAAG | 118 | 76 |
| ACCTATC | 36  | CCACGCA | 355 | 76 |
| ACCTATG | 65  | CCACGTA | 118 | 76 |
| ACCTATT | 83  | CCAGCCG | 118 | 76 |
| ACCTCAA | 69  | CCCATCA | 118 | 76 |
| ACCTCAC | 47  | CCCTTTG | 118 | 76 |
| ACCTCAG | 47  | CCGACCG | 118 | 76 |
| ACCTCAT | 61  | CCGCCGT | 118 | 76 |
| ACCTCCA | 54  | CCTAAAT | 118 | 76 |
| ACCTCCC | 79  | CCTACCA | 237 | 76 |
| ACCTCCG | 25  | CCTCACC | 118 | 76 |
| ACCTCCT | 79  | CCTTTGA | 118 | 76 |
| ACCTCGA | 32  | CGCGCGG | 118 | 76 |
| ACCTCGC | 54  | CGGCGGC | 237 | 76 |
| ACCTCGG | 43  | CGGTTTC | 118 | 76 |
| ACCTCGT | 29  | CGTCCTC | 237 | 76 |
| ACCTCTA | 29  | CTAAATC | 118 | 76 |
| ACCTCTC | 51  | CTACCAA | 237 | 76 |
| ACCTCTG | 51  | CTCCATG | 118 | 76 |
| ACCTCTT | 76  | CTGCACC | 237 | 76 |
| ACCTGAA | 40  | CTGTCCA | 118 | 76 |

|         |     |          |     |    |
|---------|-----|----------|-----|----|
| ACCTGAC | 36  | GAAAAAC  | 118 | 76 |
| ACCTGAG | 22  | GA ACTAT | 118 | 76 |
| ACCTGAT | 47  | GACTGCA  | 118 | 76 |
| ACCTGCA | 61  | GAGCCAT  | 118 | 76 |
| ACCTGCC | 29  | GATCAAA  | 118 | 76 |
| ACCTGCG | 40  | GATCTCC  | 118 | 76 |
| ACCTGCT | 47  | GCAGCAT  | 118 | 76 |
| ACCTGGA | 43  | GCCACAC  | 118 | 76 |
| ACCTGGC | 25  | GCGCCCG  | 237 | 76 |
| ACCTGGG | 14  | GCTAACT  | 118 | 76 |
| ACCTGGT | 22  | GCTCAAA  | 237 | 76 |
| ACCTGTA | 61  | GCTGCTA  | 237 | 76 |
| ACCTGTC | 18  | GCTGGCT  | 237 | 76 |
| ACCTGTG | 40  | GGAGGGG  | 237 | 76 |
| ACCTGTT | 32  | GGCCCAA  | 118 | 76 |
| ACCTTAA | 32  | GGCGGCA  | 118 | 76 |
| ACCTTAC | 22  | GGTGGAG  | 118 | 76 |
| ACCTTAG | 18  | GTAGCTA  | 118 | 76 |
| ACCTTAT | 69  | GTGAAGC  | 118 | 76 |
| ACCTTCA | 87  | GTGCAAG  | 118 | 76 |
| ACCTTCC | 54  | GTGTTGA  | 118 | 76 |
| ACCTTCG | 69  | GTGTTTC  | 237 | 76 |
| ACCTTCT | 65  | TAACAAC  | 118 | 76 |
| ACCTTGA | 54  | TACCAAG  | 118 | 76 |
| ACCTTGC | 29  | TACCCAA  | 118 | 76 |
| ACCTTGG | 29  | TAGCTGC  | 118 | 76 |
| ACCTTGT | 36  | TATCCCT  | 237 | 76 |
| ACCTTTA | 58  | TATTCTG  | 118 | 76 |
| ACCTTTC | 61  | TCAAGTT  | 237 | 76 |
| ACCTTTG | 133 | TCCAACG  | 118 | 76 |
| ACCTTTT | 112 | TCCAGAA  | 118 | 76 |
| ACGAAAA | 105 | TCGATCG  | 118 | 76 |
| ACGAAAC | 61  | TCGTCTT  | 237 | 76 |
| ACGAAAG | 58  | TCGTTTC  | 118 | 76 |
| ACGAAAT | 61  | TGACCTA  | 118 | 76 |
| ACGAACA | 51  | TGATAAT  | 118 | 76 |
| ACGAACC | 40  | TGCCTGT  | 118 | 76 |
| ACGAACG | 18  | TGGTGTG  | 118 | 76 |
| ACGAACT | 32  | TGTGTAG  | 118 | 76 |
| ACGAAGA | 40  | TGTTACA  | 118 | 76 |
| ACGAAGC | 54  | T TACTTT | 237 | 76 |
| ACGAAGG | 43  | TTGGAGC  | 237 | 76 |
| ACGAAGT | 11  | TTTTTCG  | 118 | 76 |
| ACGAATA | 18  | AACTGTT  | 237 | 72 |
| ACGAATC | 18  | AAGCACC  | 118 | 72 |
| ACGAATG | 14  | AAGCAGA  | 118 | 72 |
| ACGAATT | 36  | ACCCATC  | 237 | 72 |
| ACGACAA | 112 | ACTCACT  | 237 | 72 |
| ACGACAC | 54  | ACTGCAA  | 118 | 72 |
| ACGACAG | 51  | ACTTCTC  | 118 | 72 |
| ACGACAT | 43  | ACTTTAG  | 118 | 72 |
| ACGACCA | 36  | AGCAGCG  | 237 | 72 |

|         |    |         |     |    |
|---------|----|---------|-----|----|
| ACGACCC | 32 | AGCCCAT | 118 | 72 |
| ACGACCG | 36 | AGCTACA | 118 | 72 |
| ACGACCT | 47 | AGCTGCT | 118 | 72 |
| ACGACGA | 76 | ATAACCA | 118 | 72 |
| ACGACGC | 61 | ATACTCC | 118 | 72 |
| ACGACGG | 65 | ATACTTT | 118 | 72 |
| ACGACGT | 32 | ATCACCG | 118 | 72 |
| ACGACTA | 32 | ATCGATT | 118 | 72 |
| ACGACTC | 54 | ATGCAGC | 118 | 72 |
| ACGACTG | 40 | ATGGTTA | 118 | 72 |
| ACGACTT | 43 | ATTCAAG | 118 | 72 |
| ACGAGAA | 65 | CAAAGG  | 118 | 72 |
| ACGAGAC | 47 | CAAATAC | 118 | 72 |
| ACGAGAG | 43 | CAACGGT | 118 | 72 |
| ACGAGAT | 40 | CAAGTTG | 118 | 72 |
| ACGAGCA | 61 | CAATACA | 118 | 72 |
| ACGAGCC | 54 | CACAAAT | 118 | 72 |
| ACGAGCG | 18 | CACATGG | 118 | 72 |
| ACGAGCT | 65 | CACCCTC | 118 | 72 |
| ACGAGGA | 47 | CACCTAT | 118 | 72 |
| ACGAGGC | 18 | CAGCCCC | 118 | 72 |
| ACGAGGG | 43 | CATAGAT | 237 | 72 |
| ACGAGGT | 29 | CATATAG | 118 | 72 |
| ACGAGTA | 47 | CATCGCC | 118 | 72 |
| ACGAGTC | 36 | CATGCCC | 118 | 72 |
| ACGAGTG | 32 | CCAAGCT | 118 | 72 |
| ACGAGTT | 40 | CCACACA | 118 | 72 |
| ACGATAA | 40 | CCATCGA | 237 | 72 |
| ACGATAA | 40 | CCCCGTT | 118 | 72 |
| ACGATAC | 29 | CCGGCGG | 118 | 72 |
| ACGATAG | 22 | CCGGGCC | 118 | 72 |
| ACGATCA | 18 | CCGGTTT | 118 | 72 |
| ACGATCC | 32 | CCGTCCT | 118 | 72 |
| ACGATCG | 25 | CCTATCA | 118 | 72 |
| ACGATCT | 40 | CGACCGT | 118 | 72 |
| ACGATGA | 65 | CGCAAAA | 118 | 72 |
| ACGATGC | 14 | CGCCCCT | 237 | 72 |
| ACGATGG | 25 | CGCGCCG | 118 | 72 |
| ACGATGT | 25 | CGCTCCT | 237 | 72 |
| ACGATTA | 43 | CGGCCGT | 118 | 72 |
| ACGATTC | 18 | CGGGCCA | 118 | 72 |
| ACGATTG | 22 | CGGGCGG | 118 | 72 |
| ACGATTT | 29 | CGTCCCC | 118 | 72 |
| ACGCAAA | 47 | CGTGGCG | 118 | 72 |
| ACGCAAC | 58 | CTCAAAC | 118 | 72 |
| ACGCAAG | 29 | CTCACAC | 118 | 72 |
| ACGCAAT | 25 | CTCGCCA | 118 | 72 |
| ACGCACA | 32 | CTCGTTT | 118 | 72 |
| ACGCACC | 32 | CTTCACA | 118 | 72 |
| ACGCACG | 97 | CTTCTAT | 118 | 72 |
| ACGCACT | 14 | CTTTAGC | 118 | 72 |
| ACGCAGA | 58 | GAAAGGA | 118 | 72 |

|         |    |         |     |    |
|---------|----|---------|-----|----|
| ACGCAGC | 40 | GAACAAC | 118 | 72 |
| ACGCAGG | 11 | GATACAT | 118 | 72 |
| ACGCAGT | 14 | GATCTCA | 118 | 72 |
| ACGCATA | 22 | GCAAAAC | 118 | 72 |
| ACGCATC | 29 | GCAAGTA | 355 | 72 |
| ACGCATG | 65 | GCATGGG | 118 | 72 |
| ACGCATT | 29 | GCCAAAC | 118 | 72 |
| ACGCCAA | 25 | GCCACGT | 118 | 72 |
| ACGCCAC | 47 | GCCCACG | 237 | 72 |
| ACGCCAG | 29 | GCCGCAG | 237 | 72 |
| ACGCCAT | 36 | GCGGAGC | 118 | 72 |
| ACGCCCA | 40 | GCGGTGG | 118 | 72 |
| ACGCCCC | 61 | GCTACTA | 355 | 72 |
| ACGCCCG | 25 | GCTAGAT | 118 | 72 |
| ACGCCCT | 51 | GCTTTGG | 118 | 72 |
| ACGCCGA | 32 | GGAGTTT | 118 | 72 |
| ACGCCGC | 40 | GGCCAC  | 118 | 72 |
| ACGCCGG | 43 | GGCTTTT | 118 | 72 |
| ACGCCGT | 32 | GGGAGGG | 118 | 72 |
| ACGCCTA | 18 | GGGCCAC | 118 | 72 |
| ACGCCTC | 32 | GGTCCCT | 118 | 72 |
| ACGCCTG | 40 | GGTTGGA | 118 | 72 |
| ACGCCTT | 22 | GTATATG | 118 | 72 |
| ACGCGAA | 14 | GTGGCGG | 118 | 72 |
| ACGCGAC | 36 | GTGGTGT | 118 | 72 |
| ACGCGAG | 22 | GTTATCT | 118 | 72 |
| ACGCGAT | 25 | TAAGTAT | 118 | 72 |
| ACGCGCA | 18 | TACAGAA | 118 | 72 |
| ACGCGCC | 61 | TACATAC | 118 | 72 |
| ACGCGCG | 54 | TACTTTG | 118 | 72 |
| ACGCGCT | 25 | TATTTGC | 118 | 72 |
| ACGCGGA | 18 | TCACATC | 118 | 72 |
| ACGCGGC | 22 | TCCACAA | 118 | 72 |
| ACGCGGG | 40 | TCCACAA | 118 | 72 |
| ACGCGGT | 22 | TCCATGC | 237 | 72 |
| ACGCGTA | 22 | TCCCAAC | 118 | 72 |
| ACGCGTC | 40 | TCGCCGT | 118 | 72 |
| ACGCGTG | 22 | TCGCCTC | 118 | 72 |
| ACGCGTT | 18 | TCTGCTC | 237 | 72 |
| ACGCTAA | 25 | TGCCCTC | 118 | 72 |
| ACGCTAC | 25 | TGCTAAT | 118 | 72 |
| ACGCTAG | 29 | TGCTGTG | 118 | 72 |
| ACGCTAT | 25 | TGGAGAA | 237 | 72 |
| ACGCTCA | 14 | TGTACAC | 118 | 72 |
| ACGCTCC | 54 | TGTGCCT | 118 | 72 |
| ACGCTCG | 40 | TGTTCCA | 118 | 72 |
| ACGCTCT | 18 | TGTTCCC | 118 | 72 |
| ACGCTGA | 29 | TTAATCA | 118 | 72 |
| ACGCTGA | 29 | TTAGTAT | 118 | 72 |
| ACGCTGC | 22 | TTATAAG | 118 | 72 |
| ACGCTGT | 36 | TTATTGG | 118 | 72 |
| ACGCTTA | 43 | TTCAACA | 118 | 72 |



|         |    |         |     |    |
|---------|----|---------|-----|----|
| ACGCTTC | 32 | TTCACCA | 118 | 72 |
| ACGCTTG | 43 | TTCTCCA | 118 | 72 |
| ACGCTTT | 22 | TTGAAAG | 118 | 72 |
| ACGGAAA | 36 | TTGTGGT | 118 | 72 |
| ACGGAAC | 11 | AAATCCC | 118 | 69 |
| ACGGAAG | 18 | AAATGTC | 118 | 69 |
| ACGGAAT | 25 | AACACTT | 118 | 69 |
| ACGGACA | 43 | AACTCAC | 118 | 69 |
| ACGGACC | 22 | AAGCTTC | 118 | 69 |
| ACGGACG | 61 | AATACTC | 118 | 69 |
| ACGGACT | 14 | AATCTCC | 118 | 69 |
| ACGGAGA | 47 | AATTGCT | 118 | 69 |
| ACGGAGC | 69 | ACAAAGG | 118 | 69 |
| ACGGAGG | 65 | ACCGATC | 118 | 69 |
| ACGGAGT | 32 | ACTATAA | 118 | 69 |
| ACGGATA | 36 | ACTCACC | 118 | 69 |
| ACGGATC | 51 | AGAGATC | 118 | 69 |
| ACGGATG | 40 | AGCCTAG | 118 | 69 |
| ACGGATT | 29 | AGCGAAG | 118 | 69 |
| ACGGCAA | 40 | AGGATGA | 118 | 69 |
| ACGGCAC | 40 | AGGCCAC | 118 | 69 |
| ACGGCAG | 43 | AGGGAGT | 118 | 69 |
| ACGGCAT | 22 | AGGGGGG | 118 | 69 |
| ACGGCCA | 65 | AGGGTGA | 118 | 69 |
| ACGGCCC | 47 | AGTAGCA | 118 | 69 |
| ACGGCCG | 43 | ATAAGCA | 355 | 69 |
| ACGGCCT | 40 | ATCAAGT | 118 | 69 |
| ACGGCGA | 32 | ATCCCCA | 118 | 69 |
| ACGGCGC | 40 | ATGCACC | 118 | 69 |
| ACGGCGG | 47 | ATGCCTC | 118 | 69 |
| ACGGCGT | 32 | ATGCGTG | 118 | 69 |
| ACGGCTA | 47 | ATGGAAG | 118 | 69 |
| ACGGCTC | 54 | ATGGTGA | 237 | 69 |
| ACGGCTG | 47 | CAAGCCT | 118 | 69 |
| ACGGCTT | 11 | CAAGGCC | 118 | 69 |
| ACGGGAA | 11 | CAATGAT | 118 | 69 |
| ACGGGAC | 29 | CACAATA | 118 | 69 |
| ACGGGAG | 22 | CACACCG | 118 | 69 |
| ACGGGAT | 54 | CAGTGCA | 118 | 69 |
| ACGGGCA | 36 | CATAGTA | 118 | 69 |
| ACGGGCC | 83 | CCAAGTG | 118 | 69 |
| ACGGGCG | 18 | CCACACT | 118 | 69 |
| ACGGGCT | 69 | CCACCCA | 118 | 69 |
| ACGGGGA | 40 | CCATTTT | 118 | 69 |
| ACGGGGC | 36 | CCCATTT | 118 | 69 |
| ACGGGGG | 7  | CCCCCCT | 118 | 69 |
| ACGGGGT | 29 | CCCGTCC | 118 | 69 |
| ACGGGTA | 22 | CCGCCAC | 118 | 69 |
| ACGGGTC | 11 | CCTAACC | 118 | 69 |
| ACGGGTG | 36 | CGAAAAA | 118 | 69 |
| ACGGGTT | 43 | CGAAACC | 118 | 69 |
| ACGGTAA | 25 | CGTTTTT | 118 | 69 |

|          |     |         |     |    |
|----------|-----|---------|-----|----|
| ACGGTAC  | 18  | CTACCAT | 237 | 69 |
| ACGGTAG  | 11  | CTAGCTC | 118 | 69 |
| ACGGTAT  | 18  | CTCCAAG | 118 | 69 |
| ACGGTCA  | 54  | CTTCACC | 118 | 69 |
| ACGGTCC  | 148 | GAAAGCT | 118 | 69 |
| ACGGTCG  | 58  | GAAATCA | 118 | 69 |
| ACGGTCT  | 54  | GACAAGA | 118 | 69 |
| ACGGTGA  | 36  | GAGAGCT | 118 | 69 |
| ACGGTGC  | 51  | GAGCTGG | 118 | 69 |
| ACGGTGG  | 69  | GAGTAGA | 118 | 69 |
| ACGGTGT  | 32  | GATCTTC | 118 | 69 |
| ACGGTTA  | 25  | GATGAAT | 118 | 69 |
| ACGGTTC  | 22  | GATTGGT | 118 | 69 |
| ACGGTTG  | 29  | GCACCAA | 237 | 69 |
| ACGGTTT  | 72  | GCATATG | 118 | 69 |
| ACGTAAA  | 36  | GCCCTGC | 118 | 69 |
| ACGTAAAC | 22  | GCGGCCC | 237 | 69 |
| ACGTAAAG | 11  | GGAAGCC | 118 | 69 |
| ACGTAAT  | 36  | GGCAAGA | 118 | 69 |
| ACGTACA  | 47  | GGCCCAT | 118 | 69 |
| ACGTACC  | 51  | GGGCAAG | 118 | 69 |
| ACGTACG  | 101 | GGGCTAG | 118 | 69 |
| ACGTAAT  | 58  | GGGTTTG | 118 | 69 |
| ACGTAGA  | 51  | GGTCGCC | 118 | 69 |
| ACGTAGC  | 22  | GGTGCTT | 118 | 69 |
| ACGTAGG  | 14  | GGTTTGA | 118 | 69 |
| ACGTAGT  | 36  | GTCACAC | 118 | 69 |
| ACGTATA  | 54  | GTCTGCT | 237 | 69 |
| ACGTATC  | 14  | GTCTTTC | 118 | 69 |
| ACGTATG  | 25  | GTGACCA | 118 | 69 |
| ACGTATT  | 14  | GTGCTTA | 118 | 69 |
| ACGTCAA  | 40  | GTGGGGG | 118 | 69 |
| ACGTCAC  | 43  | GTGTCAC | 118 | 69 |
| ACGTCAG  | 32  | TAGCAAC | 118 | 69 |
| ACGTCAT  | 32  | TAGGCTT | 118 | 69 |
| ACGTCCA  | 32  | TATAAGC | 237 | 69 |
| ACGTCCC  | 22  | TATCATG | 118 | 69 |
| ACGTCCG  | 36  | TATGGTC | 118 | 69 |
| ACGTCCT  | 22  | TCAAGAG | 118 | 69 |
| ACGTCGA  | 58  | TCAAGCT | 118 | 69 |
| ACGTCGC  | 18  | TCACACA | 237 | 69 |
| ACGTCGG  | 25  | TCACCAG | 118 | 69 |
| ACGTCGT  | 36  | TCACCGC | 118 | 69 |
| ACGTCTA  | 18  | TCCCCGT | 118 | 69 |
| ACGTCTC  | 58  | TCCGAGC | 118 | 69 |
| ACGTCTG  | 11  | TCCTTAG | 118 | 69 |
| ACGTCTT  | 25  | TCTCAAC | 118 | 69 |
| ACGTGAA  | 32  | TCTGATT | 118 | 69 |
| ACGTGAA  | 32  | TGAACCC | 118 | 69 |
| ACGTGAG  | 29  | TGACCAT | 118 | 69 |
| ACGTGAT  | 47  | TGCAGTT | 118 | 69 |
| ACGTGCA  | 76  | TGGGATT | 118 | 69 |

|         |     |         |     |    |
|---------|-----|---------|-----|----|
| ACGTGCC | 47  | TGGGTTT | 118 | 69 |
| ACGTGCG | 47  | TGGTTAG | 118 | 69 |
| ACGTGCT | 51  | TGTCAGC | 237 | 69 |
| ACGTGGA | 79  | TGTCCTT | 118 | 69 |
| ACGTGGC | 76  | TTAATAC | 118 | 69 |
| ACGTGGG | 40  | TTATCCA | 473 | 69 |
| ACGTGGT | 36  | TTGTGCC | 118 | 69 |
| ACGTGTA | 43  | TTGTTAC | 237 | 69 |
| ACGTGTC | 40  | TTTCTGC | 118 | 69 |
| ACGTGTG | 43  | AAAGCCC | 118 | 65 |
| ACGTGTT | 25  | AAATAGC | 118 | 65 |
| ACGTTAA | 18  | AACCCAT | 118 | 65 |
| ACGTTAC | 14  | AAGTTGG | 237 | 65 |
| ACGTTAG | 11  | AAGTTTC | 118 | 65 |
| ACGTTAT | 22  | AATATGC | 118 | 65 |
| ACGTTCA | 36  | AATCTAT | 118 | 65 |
| ACGTTCC | 22  | AATGATC | 118 | 65 |
| ACGTTCG | 40  | AATGTCA | 118 | 65 |
| ACGTTCT | 25  | ACAATCA | 237 | 65 |
| ACGTTGA | 22  | ACAATGA | 118 | 65 |
| ACGTTGC | 40  | ACCACTC | 118 | 65 |
| ACGTTGG | 29  | ACCTTCT | 118 | 65 |
| ACGTTGT | 25  | ACGGCCA | 237 | 65 |
| ACGTTTA | 25  | ACTGCTG | 118 | 65 |
| ACGTTTC | 18  | AGAGCAG | 355 | 65 |
| ACGTTTG | 29  | AGAGCAT | 118 | 65 |
| ACGTTTT | 65  | AGAGGCC | 118 | 65 |
| ACTAAAA | 166 | AGATAGT | 118 | 65 |
| ACTAAAC | 94  | AGCAAGT | 237 | 65 |
| ACTAAAG | 72  | AGCTCAA | 118 | 65 |
| ACTAAAT | 123 | AGCTCGT | 118 | 65 |
| ACTAACA | 65  | AGCTGCC | 118 | 65 |
| ACTAACC | 79  | AGGACGA | 118 | 65 |
| ACTAACG | 36  | AGGTGGA | 118 | 65 |
| ACTAACT | 51  | AGTATTA | 118 | 65 |
| ACTAAGA | 29  | AGTTCTT | 118 | 65 |
| ACTAAGC | 51  | ATACAGT | 118 | 65 |
| ACTAAGG | 36  | ATCCTAA | 118 | 65 |
| ACTAAGT | 51  | ATCCTAG | 118 | 65 |
| ACTAATA | 87  | ATGCAAG | 118 | 65 |
| ACTAATC | 51  | ATGGGCT | 118 | 65 |
| ACTAATG | 47  | CAAAGAG | 237 | 65 |
| ACTAATT | 112 | CACACAG | 118 | 65 |
| ACTACAA | 54  | CACACTC | 237 | 65 |
| ACTACAC | 43  | CACAGAA | 118 | 65 |
| ACTACAG | 47  | CACATAA | 118 | 65 |
| ACTACAT | 94  | CACGGGC | 118 | 65 |
| ACTACCA | 61  | CAGATAA | 118 | 65 |
| ACTACCC | 43  | CAGCATC | 118 | 65 |
| ACTACCG | 18  | CAGCTGC | 118 | 65 |
| ACTACCT | 47  | CATCTGC | 118 | 65 |
| ACTACGA | 43  | CCAATCG | 118 | 65 |

|         |     |         |     |    |
|---------|-----|---------|-----|----|
| ACTACGC | 14  | CCCACAC | 118 | 65 |
| ACTACGG | 14  | CCCCCGC | 118 | 65 |
| ACTACGT | 11  | CCCTACC | 237 | 65 |
| ACTACTA | 90  | CCTCACA | 118 | 65 |
| ACTACTC | 76  | CCTCCGT | 237 | 65 |
| ACTACTG | 65  | CCTTTCG | 118 | 65 |
| ACTACTT | 61  | CGACGGC | 118 | 65 |
| ACTAGAA | 69  | CGAGTCC | 118 | 65 |
| ACTAGAC | 47  | CGATTTG | 118 | 65 |
| ACTAGAG | 69  | CGCCGCG | 118 | 65 |
| ACTAGAT | 72  | CGCTCTC | 118 | 65 |
| ACTAGCA | 87  | CGGCTAT | 118 | 65 |
| ACTAGCC | 36  | CGTCGCG | 118 | 65 |
| ACTAGCG | 22  | CTAATTG | 118 | 65 |
| ACTAGCT | 94  | CTACATT | 118 | 65 |
| ACTAGGA | 47  | CTCAAGA | 118 | 65 |
| ACTAGGC | 54  | CTCACCG | 118 | 65 |
| ACTAGGG | 25  | CTCATAA | 118 | 65 |
| ACTAGGT | 43  | CTCTCGT | 118 | 65 |
| ACTAGTA | 61  | CTGCCCC | 118 | 65 |
| ACTAGTC | 51  | CTGCTAA | 118 | 65 |
| ACTAGTG | 58  | CTGTAAA | 118 | 65 |
| ACTAGTT | 119 | CTGTACA | 237 | 65 |
| ACTATAA | 69  | CTTCAA  | 118 | 65 |
| ACTATAC | 54  | GAAGCGA | 118 | 65 |
| ACTATAG | 72  | GAAGTGG | 118 | 65 |
| ACTATAT | 112 | GACAAAG | 237 | 65 |
| ACTATCA | 40  | GACACCT | 118 | 65 |
| ACTATCC | 32  | GAGACAA | 118 | 65 |
| ACTATCG | 18  | GAGATCC | 118 | 65 |
| ACTATCT | 58  | GCAAGTT | 118 | 65 |
| ACTATGA | 61  | GCAGCGC | 118 | 65 |
| ACTATGC | 47  | GCATCCT | 118 | 65 |
| ACTATGG | 54  | GCCAGCA | 118 | 65 |
| ACTATGT | 61  | GCCGTCC | 118 | 65 |
| ACTATTA | 69  | GCCTTGT | 118 | 65 |
| ACTATTC | 65  | GCTAATT | 355 | 65 |
| ACTATTG | 65  | GCTAGTT | 118 | 65 |
| ACTATTT | 144 | GCTCAGC | 118 | 65 |
| ACTCAAA | 101 | GCTCGTT | 237 | 65 |
| ACTCAAC | 58  | GCTTCTA | 118 | 65 |
| ACTCAAG | 58  | GCTTGCG | 118 | 65 |
| ACTCAAT | 40  | GCTTTTA | 118 | 65 |
| ACTCACA | 32  | GGACGAC | 118 | 65 |
| ACTCACA | 32  | GGCCAAT | 118 | 65 |
| ACTCACC | 69  | GGCGGCC | 118 | 65 |
| ACTCACT | 72  | GGGGAAG | 118 | 65 |
| ACTCAGA | 51  | GGTGTGG | 118 | 65 |
| ACTCAGC | 43  | GGTTTAT | 118 | 65 |
| ACTCAGG | 22  | GGTTTGC | 118 | 65 |
| ACTCAGT | 29  | GTCGCCT | 118 | 65 |
| ACTCATA | 112 | GTGTGGT | 118 | 65 |

|         |     |         |     |    |
|---------|-----|---------|-----|----|
| ACTCATC | 87  | TAAGGTG | 118 | 65 |
| ACTCATG | 76  | TAGCCTC | 118 | 65 |
| ACTCATT | 76  | TAGTACT | 118 | 65 |
| ACTCCAA | 94  | TCAAAGC | 118 | 65 |
| ACTCCAC | 54  | TCAGCAA | 118 | 65 |
| ACTCCAG | 43  | TCAGCTT | 118 | 65 |
| ACTCCAT | 76  | TCATAAT | 118 | 65 |
| ACTCCCA | 32  | TCCACCC | 118 | 65 |
| ACTCCCC | 61  | TCCATTG | 118 | 65 |
| ACTCCCG | 36  | TCCAAT  | 118 | 65 |
| ACTCCCT | 40  | TCCCTAC | 118 | 65 |
| ACTCCGA | 58  | TCCTGCA | 118 | 65 |
| ACTCCGC | 36  | TCGAGAG | 118 | 65 |
| ACTCCGG | 25  | TCGCCAC | 237 | 65 |
| ACTCCGT | 40  | TCGTCCC | 118 | 65 |
| ACTCCTA | 87  | TCTAAGG | 118 | 65 |
| ACTCCTC | 87  | TCTCACC | 118 | 65 |
| ACTCCTG | 29  | TCTGATC | 118 | 65 |
| ACTCCTT | 87  | TGAAAGG | 118 | 65 |
| ACTCGAA | 40  | TGAATGA | 118 | 65 |
| ACTCGAC | 36  | TGAGTTG | 118 | 65 |
| ACTCGAG | 32  | TGATGGA | 118 | 65 |
| ACTCGAT | 54  | TGCCGTG | 118 | 65 |
| ACTCGCA | 14  | TGCGGCT | 118 | 65 |
| ACTCGCC | 61  | TGTATTG | 118 | 65 |
| ACTCGCG | 36  | TTCAGAA | 118 | 65 |
| ACTCGCT | 58  | TTCCACT | 237 | 65 |
| ACTCGGA | 43  | TTCTATG | 118 | 65 |
| ACTCGGC | 69  | TTCTGAG | 118 | 65 |
| ACTCGGG | 18  | TTTTCGG | 118 | 65 |
| ACTCGGT | 22  | AAAATCG | 237 | 61 |
| ACTCGTA | 14  | AAAGGCA | 118 | 61 |
| ACTCGTC | 29  | AACAGTG | 118 | 61 |
| ACTCGTG | 40  | AAGATAG | 118 | 61 |
| ACTCGTT | 47  | AAGCTCA | 237 | 61 |
| ACTCTAA | 69  | AAGTGGG | 118 | 61 |
| ACTCTAC | 54  | AAGTTAT | 118 | 61 |
| ACTCTAG | 40  | AATCACC | 118 | 61 |
| ACTCTAT | 83  | AATCTGT | 118 | 61 |
| ACTCTCA | 54  | ACAGCAC | 118 | 61 |
| ACTCTCC | 72  | ACAGCTT | 118 | 61 |
| ACTCTCG | 32  | ACCAAGC | 118 | 61 |
| ACTCTCT | 112 | ACCCACC | 118 | 61 |
| ACTCTGA | 61  | ACCTCAT | 118 | 61 |
| ACTCTGC | 40  | ACCTGCA | 118 | 61 |
| ACTCTGG | 29  | ACGACGC | 118 | 61 |
| ACTCTGT | 51  | ACTACCA | 118 | 61 |
| ACTCTTA | 61  | ACTAGTA | 118 | 61 |
| ACTCTTC | 87  | ACTCCCC | 237 | 61 |
| ACTCTTG | 76  | AGAAGTT | 118 | 61 |
| ACTCTTT | 76  | AGCAGCT | 118 | 61 |
| ACTGAAA | 90  | AGCAGTG | 118 | 61 |

|         |     |         |     |    |
|---------|-----|---------|-----|----|
| ACTGAAC | 25  | AGCATAA | 118 | 61 |
| ACTGAAG | 40  | AGCCTTG | 118 | 61 |
| ACTGAAT | 76  | AGCGATC | 118 | 61 |
| ACTGACA | 51  | AGCTAAC | 118 | 61 |
| ACTGACC | 29  | AGGCTTT | 118 | 61 |
| ACTGACG | 14  | AGGGGCA | 118 | 61 |
| ACTGACT | 54  | AGGTCTT | 118 | 61 |
| ACTGAGA | 40  | AGTCACA | 118 | 61 |
| ACTGAGC | 22  | ATACCTA | 237 | 61 |
| ACTGAGG | 29  | ATATCCA | 118 | 61 |
| ACTGAGT | 43  | ATCCACC | 118 | 61 |
| ACTGATA | 40  | ATGTTCC | 118 | 61 |
| ACTGATC | 47  | CACAACC | 118 | 61 |
| ACTGATG | 83  | CACCGCT | 118 | 61 |
| ACTGATT | 43  | CACCTGC | 118 | 61 |
| ACTGCAA | 72  | CACTTGA | 118 | 61 |
| ACTGCAC | 58  | CATAAAC | 237 | 61 |
| ACTGCAG | 18  | CATATGC | 118 | 61 |
| ACTGCAT | 108 | CATGATC | 118 | 61 |
| ACTGCCA | 61  | CCAACTA | 118 | 61 |
| ACTGCCC | 43  | CCAATCA | 118 | 61 |
| ACTGCCG | 36  | CCAATCT | 118 | 61 |
| ACTGCCT | 36  | CCAATGA | 118 | 61 |
| ACTGCGA | 14  | CCACTCC | 118 | 61 |
| ACTGCGC | 18  | CCAGCTG | 237 | 61 |
| ACTGCGG | 29  | CCAGGCA | 118 | 61 |
| ACTGCGT | 40  | CCCAACT | 237 | 61 |
| ACTGCTA | 58  | CCCACGC | 118 | 61 |
| ACTGCTC | 90  | CCCGTCG | 118 | 61 |
| ACTGCTG | 65  | CCGCACC | 118 | 61 |
| ACTGCTT | 51  | CCGTCCA | 118 | 61 |
| ACTGGAA | 54  | CCTAGCC | 118 | 61 |
| ACTGGAC | 47  | CCTATTA | 118 | 61 |
| ACTGGAG | 40  | CCTGCAA | 118 | 61 |
| ACTGGAT | 47  | CCTGCGC | 118 | 61 |
| ACTGGCA | 36  | CCTTCAC | 118 | 61 |
| ACTGGCC | 43  | CCTTGCC | 118 | 61 |
| ACTGGCG | 25  | CGAAAGA | 118 | 61 |
| ACTGGCT | 32  | CGACCCG | 118 | 61 |
| ACTGGGA | 22  | CGAGCCG | 237 | 61 |
| ACTGGGC | 32  | CGCACCC | 118 | 61 |
| ACTGGGG | 11  | CGCCGCA | 118 | 61 |
| ACTGGGT | 18  | CGGAGCC | 237 | 61 |
| ACTGGTA | 43  | CGTCTTT | 118 | 61 |
| ACTGGTC | 40  | CGTGCAA | 118 | 61 |
| ACTGGTG | 58  | CTAGATG | 118 | 61 |
| ACTGGTT | 54  | CTATCAC | 118 | 61 |
| ACTGTAA | 76  | CTATCCA | 118 | 61 |
| ACTGTAC | 58  | CTATGTT | 237 | 61 |
| ACTGTAG | 58  | CTCCGCT | 237 | 61 |
| ACTGTAT | 47  | CTCGACT | 118 | 61 |
| ACTGTCA | 47  | CTCTCGC | 237 | 61 |

|          |     |         |     |    |
|----------|-----|---------|-----|----|
| ACTGTCC  | 108 | CTCTCTG | 237 | 61 |
| ACTGTCCG | 22  | CTCTGTC | 118 | 61 |
| ACTGTCT  | 58  | CTGCAAA | 118 | 61 |
| ACTGTGA  | 51  | CTGCTTC | 118 | 61 |
| ACTGTGC  | 40  | CTGTGCT | 118 | 61 |
| ACTGTGG  | 22  | CTTCCAG | 118 | 61 |
| ACTGTGT  | 65  | CTTGTGA | 118 | 61 |
| ACTGTTA  | 61  | GAACAAT | 118 | 61 |
| ACTGTTC  | 79  | GAAGCCT | 118 | 61 |
| ACTGTTG  | 43  | GAATCTA | 118 | 61 |
| ACTGTTT  | 69  | GACAATA | 118 | 61 |
| ACTTAAA  | 105 | GACATAA | 118 | 61 |
| ACTTAAC  | 65  | GACTGCT | 118 | 61 |
| ACTTAAG  | 40  | GAGTTGC | 118 | 61 |
| ACTTAAT  | 76  | GATCCTA | 118 | 61 |
| ACTTACA  | 36  | GATGGGC | 118 | 61 |
| ACTTACC  | 25  | GCAATGC | 118 | 61 |
| ACTTACG  | 11  | GCACACG | 118 | 61 |
| ACTTACT  | 25  | GCACCCA | 118 | 61 |
| ACTTAGA  | 76  | GCATAGA | 118 | 61 |
| ACTTAGC  | 32  | GCCCTTT | 118 | 61 |
| ACTTAGG  | 32  | GCCTGTG | 118 | 61 |
| ACTTAGT  | 40  | GCGCGCT | 118 | 61 |
| ACTTATA  | 101 | GCTGCTC | 118 | 61 |
| ACTTATA  | 101 | GCTGGTG | 118 | 61 |
| ACTTATG  | 43  | GCTGTGC | 118 | 61 |
| ACTTATT  | 115 | GCTTATA | 237 | 61 |
| ACTTCAA  | 94  | GCTTCGT | 118 | 61 |
| ACTTCAC  | 32  | GCTTGTG | 118 | 61 |
| ACTTCAG  | 29  | GGATCCC | 118 | 61 |
| ACTTCAT  | 61  | GGATTGT | 118 | 61 |
| ACTTCCA  | 83  | GGCAGCC | 118 | 61 |
| ACTTCCC  | 43  | GGCTAGG | 118 | 61 |
| ACTTCCG  | 32  | GGCTCCC | 118 | 61 |
| ACTTCCT  | 76  | GGGAAGC | 118 | 61 |
| ACTTCGA  | 22  | GGGACAC | 118 | 61 |
| ACTTCGC  | 14  | GGGGCCC | 118 | 61 |
| ACTTCGG  | 29  | GGGTCGG | 118 | 61 |
| ACTTCGT  | 18  | GGGTGAG | 118 | 61 |
| ACTTCTA  | 87  | GGTGAC  | 118 | 61 |
| ACTTCTC  | 72  | GTACATT | 118 | 61 |
| ACTTCTG  | 47  | GTGCTTT | 118 | 61 |
| ACTTCTT  | 97  | GTTTACT | 118 | 61 |
| ACTTGAA  | 47  | TAATACC | 118 | 61 |
| ACTTGAC  | 32  | TACAAGC | 118 | 61 |
| ACTTGAG  | 65  | TACAGTA | 118 | 61 |
| ACTTGAT  | 58  | TACTGCT | 118 | 61 |
| ACTTGCA  | 108 | TAGTAAG | 118 | 61 |
| ACTTGCC  | 29  | TATTATC | 118 | 61 |
| ACTTGCG  | 25  | TCCATTA | 118 | 61 |
| ACTTGCT  | 79  | TCCCTGT | 118 | 61 |
| ACTTGGA  | 119 | TCCGCC  | 237 | 61 |

|          |     |         |     |    |
|----------|-----|---------|-----|----|
| ACTTGGC  | 61  | TCGCTCC | 118 | 61 |
| ACTTGGG  | 43  | TCGTGGA | 118 | 61 |
| ACTTGGT  | 83  | TCGTTTG | 118 | 61 |
| ACTTGTA  | 108 | TCTTAGA | 118 | 61 |
| ACTTGTC  | 54  | TCTTCAG | 118 | 61 |
| ACTTGTG  | 101 | TGAGATA | 118 | 61 |
| ACTTGTT  | 144 | TGCAAGG | 118 | 61 |
| ACTTTAA  | 58  | TGCTAGT | 118 | 61 |
| ACTTTAC  | 72  | TGGACAT | 118 | 61 |
| ACTTTAG  | 72  | TGGCGGC | 237 | 61 |
| ACTTTAT  | 115 | TGGGCTT | 118 | 61 |
| ACTTTCA  | 69  | TGGGGTT | 118 | 61 |
| ACTTTCC  | 22  | TGTGTAA | 118 | 61 |
| ACTTTCCG | 14  | TGTTACT | 118 | 61 |
| ACTTTCT  | 115 | TTAATGG | 118 | 61 |
| ACTTTGA  | 94  | TTAGTGG | 118 | 61 |
| ACTTTGC  | 76  | TTATCCC | 118 | 61 |
| ACTTTGG  | 58  | TTCCCAT | 237 | 61 |
| ACTTTGT  | 101 | TTCCCTG | 118 | 61 |
| ACTTTTA  | 101 | TTCTGGT | 118 | 61 |
| ACTTTTC  | 126 | TTGCCGC | 355 | 61 |
| ACTTTTG  | 94  | AAACGAA | 237 | 58 |
| ACTTTTT  | 155 | AACAGTC | 118 | 58 |
| AGAAAAA  | 357 | AACTGCT | 237 | 58 |
| AGAAAAC  | 141 | AAGAGTG | 118 | 58 |
| AGAAAAG  | 177 | AAGCCAG | 118 | 58 |
| AGAAAAT  | 173 | AAGCCTC | 118 | 58 |
| AGAAACA  | 152 | AAGCGAG | 118 | 58 |
| AGAAACC  | 72  | AAGGATC | 118 | 58 |
| AGAAACG  | 29  | AAGGCAA | 118 | 58 |
| AGAAACT  | 112 | AATACCT | 237 | 58 |
| AGAAAGA  | 130 | ACCCCCC | 237 | 58 |
| AGAAAGC  | 105 | ACCCTCC | 118 | 58 |
| AGAAAGG  | 112 | ACTGCAC | 118 | 58 |
| AGAAAGT  | 61  | ACTGCTA | 118 | 58 |
| AGAAATA  | 137 | ACTGGTG | 118 | 58 |
| AGAAATC  | 76  | AGACAAT | 118 | 58 |
| AGAAATG  | 123 | AGACATA | 118 | 58 |
| AGAAATT  | 137 | AGACTCC | 118 | 58 |
| AGAACAA  | 94  | AGCCGAG | 118 | 58 |
| AGAACAC  | 51  | AGCTACT | 237 | 58 |
| AGAACAG  | 40  | AGGAACC | 118 | 58 |
| AGAACAT  | 76  | AGTCCAC | 118 | 58 |
| AGAACCA  | 32  | AGTTTCC | 118 | 58 |
| AGAACCC  | 43  | ATAACGA | 118 | 58 |
| AGAACCG  | 65  | ATCAAGG | 118 | 58 |
| AGAACCT  | 51  | CAACCTC | 118 | 58 |
| AGAACGA  | 43  | CAACGCA | 118 | 58 |
| AGAACGC  | 11  | CAACTTA | 118 | 58 |
| AGAACGG  | 25  | CACCCAT | 118 | 58 |
| AGAACGT  | 25  | CACGCAA | 118 | 58 |
| AGAACTA  | 94  | CACTGCA | 237 | 58 |



|         |     |          |     |    |
|---------|-----|----------|-----|----|
| AGAACTC | 47  | CACTTGC  | 118 | 58 |
| AGAACTG | 25  | CAGACAC  | 118 | 58 |
| AGAACTT | 58  | CAGACCG  | 118 | 58 |
| AGAAGAA | 242 | CAGATAT  | 118 | 58 |
| AGAAGAC | 79  | CAGCGAC  | 118 | 58 |
| AGAAGAG | 130 | CAGGCTG  | 237 | 58 |
| AGAAGAT | 105 | CATATTG  | 118 | 58 |
| AGAAGCA | 101 | CCACACG  | 118 | 58 |
| AGAAGCC | 51  | CCATCCG  | 118 | 58 |
| AGAAGCG | 25  | CCCACGT  | 237 | 58 |
| AGAAGCT | 76  | CCGACGG  | 118 | 58 |
| AGAAGGA | 87  | CCGCAGC  | 118 | 58 |
| AGAAGGC | 40  | CCGCCAG  | 118 | 58 |
| AGAAGGG | 58  | CCGTCGC  | 355 | 58 |
| AGAAGGT | 47  | CCGTCGT  | 118 | 58 |
| AGAAGTA | 65  | CCGTCTC  | 118 | 58 |
| AGAAGTC | 69  | CCTCACG  | 118 | 58 |
| AGAAGTG | 72  | CCTCCGC  | 355 | 58 |
| AGAAGTT | 61  | CCTCTCG  | 118 | 58 |
| AGAATAA | 123 | CCTGTCG  | 118 | 58 |
| AGAATAC | 54  | CGAAGAT  | 237 | 58 |
| AGAATAG | 40  | CGCCTCT  | 118 | 58 |
| AGAATAT | 101 | CGTCTCC  | 118 | 58 |
| AGAATCA | 83  | CGTGGCA  | 118 | 58 |
| AGAATCC | 47  | CGTGTAT  | 237 | 58 |
| AGAATCG | 14  | CGTGTCA  | 237 | 58 |
| AGAATCT | 61  | CTAAGGT  | 118 | 58 |
| AGAATGA | 51  | CTAGCCT  | 118 | 58 |
| AGAATGC | 47  | CTAGTAA  | 118 | 58 |
| AGAATGG | 72  | CTAGTAG  | 118 | 58 |
| AGAATGT | 61  | CTAGTCA  | 118 | 58 |
| AGAATTA | 101 | CTCCGGC  | 118 | 58 |
| AGAATTC | 65  | CTGCAAC  | 118 | 58 |
| AGAATTG | 58  | CTGCGGC  | 118 | 58 |
| AGAATTT | 108 | CTGGTGG  | 118 | 58 |
| AGACAAA | 94  | CTGTTGA  | 118 | 58 |
| AGACAAA | 94  | CTGTTGA  | 118 | 58 |
| AGACAAG | 40  | CTTCCGT  | 118 | 58 |
| AGACAAT | 58  | GAAACTA  | 237 | 58 |
| AGACACA | 58  | GACGGCC  | 118 | 58 |
| AGACACC | 87  | GACTCCA  | 118 | 58 |
| AGACACG | 32  | GACTTCA  | 118 | 58 |
| AGACACT | 14  | GAGAGTC  | 118 | 58 |
| AGACAGA | 43  | GAGGCC   | 118 | 58 |
| AGACAGC | 43  | GAGGCTG  | 118 | 58 |
| AGACAGG | 25  | GAGTGAA  | 118 | 58 |
| AGACAGT | 47  | GATTACA  | 118 | 58 |
| AGACATA | 58  | GCAAGCC  | 473 | 58 |
| AGACATC | 58  | GCCCATC  | 118 | 58 |
| AGACATG | 83  | GCCCTAA  | 118 | 58 |
| AGACATT | 79  | GCCGTCTG | 237 | 58 |
| AGACCAA | 90  | GCCTCCC  | 118 | 58 |

|         |     |          |     |    |
|---------|-----|----------|-----|----|
| AGACCAC | 65  | GCCTTTC  | 118 | 58 |
| AGACCAG | 22  | GCGAAAA  | 118 | 58 |
| AGACCAT | 47  | GCGGCTG  | 118 | 58 |
| AGACCCA | 61  | GCTGTCC  | 118 | 58 |
| AGACCCC | 32  | GGATCTT  | 118 | 58 |
| AGACCCG | 32  | GGCGGGC  | 118 | 58 |
| AGACCCT | 32  | GGGATTC  | 118 | 58 |
| AGACCGA | 25  | GGGGGGC  | 118 | 58 |
| AGACCGC | 54  | GTAGCCA  | 118 | 58 |
| AGACCGG | 36  | GTATTTG  | 118 | 58 |
| AGACCGT | 29  | GTCAATA  | 118 | 58 |
| AGACCTA | 22  | GTCACCG  | 118 | 58 |
| AGACCTC | 32  | GTCACCT  | 118 | 58 |
| AGACCTG | 14  | GTCCAAC  | 118 | 58 |
| AGACCTT | 65  | GTCGAGG  | 118 | 58 |
| AGACGAA | 83  | GTGTAGC  | 118 | 58 |
| AGACGAC | 112 | GTTAAAG  | 118 | 58 |
| AGACGAG | 47  | GTTATAG  | 118 | 58 |
| AGACGAT | 36  | TAAAGCG  | 237 | 58 |
| AGACGCA | 40  | TAACCAA  | 118 | 58 |
| AGACGCC | 40  | TAATGGT  | 237 | 58 |
| AGACGCG | 11  | TACTCCA  | 237 | 58 |
| AGACGCT | 25  | TAGAGCC  | 118 | 58 |
| AGACGGA | 40  | TATACAG  | 118 | 58 |
| AGACGGC | 43  | TATCACC  | 118 | 58 |
| AGACGGG | 40  | TATGCTA  | 237 | 58 |
| AGACGGT | 36  | TCAAACG  | 118 | 58 |
| AGACGTA | 29  | TCACACC  | 118 | 58 |
| AGACGTC | 22  | TCATTGT  | 118 | 58 |
| AGACGTG | 29  | TCCAACT  | 118 | 58 |
| AGACGTT | 25  | TCCACAC  | 118 | 58 |
| AGACTAA | 76  | TCCATAG  | 118 | 58 |
| AGACTAC | 43  | TCTGAGA  | 118 | 58 |
| AGACTAG | 58  | TCTGGTG  | 118 | 58 |
| AGACTAT | 65  | TGCTGTA  | 118 | 58 |
| AGACTCA | 32  | TGCTTCG  | 118 | 58 |
| AGACTCC | 58  | TGTA CTC | 118 | 58 |
| AGACTCG | 18  | TGTTGGG  | 118 | 58 |
| AGACTCT | 51  | TTAGCAC  | 118 | 58 |
| AGACTGA | 40  | TTCCACA  | 118 | 58 |
| AGACTGC | 29  | TTGCTGT  | 118 | 58 |
| AGACTGG | 40  | TTTGGGA  | 118 | 58 |
| AGACTGT | 40  | AACCTAG  | 118 | 54 |
| AGACTTA | 36  | AACTATC  | 118 | 54 |
| AGACTTC | 51  | AACTCCC  | 118 | 54 |
| AGACTTG | 58  | AACTTGC  | 118 | 54 |
| AGACTTT | 65  | AAGTTCT  | 118 | 54 |
| AGAGAAA | 191 | AATGAGA  | 118 | 54 |
| AGAGAAC | 76  | AATGCTG  | 118 | 54 |
| AGAGAAG | 130 | ACAAAGC  | 118 | 54 |
| AGAGAAT | 83  | ACAAGCT  | 118 | 54 |
| AGAGACA | 51  | ACACTCC  | 237 | 54 |

|         |     |         |     |    |
|---------|-----|---------|-----|----|
| AGAGACC | 58  | ACAGTAC | 118 | 54 |
| AGAGACG | 14  | ACAGTGT | 118 | 54 |
| AGAGACT | 51  | ACATTAT | 118 | 54 |
| AGAGAGA | 289 | ACGAAGC | 118 | 54 |
| AGAGAGC | 94  | ACGAGCC | 237 | 54 |
| AGAGAGG | 133 | AGATAAG | 118 | 54 |
| AGAGAGT | 87  | AGCAGAG | 118 | 54 |
| AGAGATA | 94  | AGCTCAC | 118 | 54 |
| AGAGATC | 69  | AGCTTCC | 118 | 54 |
| AGAGATG | 94  | AGGCAAC | 118 | 54 |
| AGAGATT | 108 | AGGGTCT | 118 | 54 |
| AGAGCAA | 112 | AGTAAGT | 118 | 54 |
| AGAGCAC | 40  | AGTACTC | 118 | 54 |
| AGAGCAG | 65  | AGTGAGC | 118 | 54 |
| AGAGCAT | 65  | ATAGATC | 118 | 54 |
| AGAGCCA | 101 | ATCAACG | 118 | 54 |
| AGAGCCA | 101 | ATCATTG | 118 | 54 |
| AGAGCCC | 58  | ATCCCTC | 237 | 54 |
| AGAGCCG | 29  | ATCCTAC | 237 | 54 |
| AGAGCGA | 76  | ATCGAGA | 118 | 54 |
| AGAGCGC | 43  | ATGCTGG | 118 | 54 |
| AGAGCGG | 54  | ATTCTGT | 237 | 54 |
| AGAGCGT | 22  | CAAGATC | 237 | 54 |
| AGAGCTA | 79  | CAATCGG | 118 | 54 |
| AGAGCTC | 105 | CAATGCT | 118 | 54 |
| AGAGCTG | 43  | CACGCCC | 118 | 54 |
| AGAGCTT | 54  | CACGTCC | 118 | 54 |
| AGAGGAA | 177 | CACGTGG | 355 | 54 |
| AGAGGAC | 51  | CAGATCA | 118 | 54 |
| AGAGGAG | 115 | CAGCACT | 118 | 54 |
| AGAGGAT | 87  | CAGGGTG | 118 | 54 |
| AGAGGCA | 51  | CATTTCC | 118 | 54 |
| AGAGGCC | 65  | CCAATTA | 118 | 54 |
| AGAGGCG | 25  | CCACAGA | 118 | 54 |
| AGAGGCT | 47  | CCACTCA | 118 | 54 |
| AGAGGGA | 90  | CCAGAAG | 118 | 54 |
| AGAGGGC | 79  | CCAGCTA | 118 | 54 |
| AGAGGGG | 112 | CCAGGCT | 237 | 54 |
| AGAGGGT | 79  | CCAGGTC | 118 | 54 |
| AGAGGTA | 36  | CCATTGC | 118 | 54 |
| AGAGGTC | 54  | CCCACCG | 118 | 54 |
| AGAGGTG | 101 | CCCCACT | 118 | 54 |
| AGAGGTT | 51  | CCCCCGG | 118 | 54 |
| AGAGTAA | 79  | CCCTAAA | 118 | 54 |
| AGAGTAC | 32  | CCGCCAT | 118 | 54 |
| AGAGTAG | 65  | CCGCCCA | 237 | 54 |
| AGAGTAT | 51  | CCGTGTC | 118 | 54 |
| AGAGTCA | 40  | CCTCGCT | 118 | 54 |
| AGAGTCC | 40  | CCTTAGC | 118 | 54 |
| AGAGTCG | 51  | CGAGCTG | 118 | 54 |
| AGAGTCT | 51  | CGATCCT | 118 | 54 |
| AGAGTGA | 69  | CGCCATT | 118 | 54 |

|         |     |          |     |    |
|---------|-----|----------|-----|----|
| AGAGTGC | 36  | CGCCGAT  | 118 | 54 |
| AGAGTGG | 32  | CGCCTCA  | 118 | 54 |
| AGAGTGT | 123 | CGCGACC  | 237 | 54 |
| AGAGTTA | 32  | CGGAGAG  | 118 | 54 |
| AGAGTTC | 43  | CGGAGGG  | 118 | 54 |
| AGAGTTG | 54  | CGGCAGC  | 118 | 54 |
| AGAGTTT | 83  | CGGCCTT  | 118 | 54 |
| AGATAAA | 101 | CTACTAT  | 118 | 54 |
| AGATAAC | 58  | CTCCGTC  | 237 | 54 |
| AGATAAG | 54  | CTGAGAT  | 118 | 54 |
| AGATAAT | 94  | CTGCGCC  | 118 | 54 |
| AGATACA | 51  | CTGCTAG  | 118 | 54 |
| AGATACC | 25  | CTGCTCG  | 118 | 54 |
| AGATACG | 32  | CTGGAAG  | 118 | 54 |
| AGATACT | 76  | CTGTATT  | 118 | 54 |
| AGATAGA | 97  | CTGTTCC  | 118 | 54 |
| AGATAGC | 54  | GAACCCA  | 118 | 54 |
| AGATAGG | 32  | GAATATG  | 118 | 54 |
| AGATAGT | 65  | GACTAAT  | 118 | 54 |
| AGATATA | 126 | GAGAACT  | 118 | 54 |
| AGATATC | 61  | GAGTCCA  | 118 | 54 |
| AGATATG | 112 | GATAGAT  | 118 | 54 |
| AGATATT | 94  | GCAAGAT  | 118 | 54 |
| AGATCAA | 94  | GCACGCC  | 118 | 54 |
| AGATCAC | 32  | GCCGAGA  | 118 | 54 |
| AGATCAG | 14  | GCCTAGG  | 118 | 54 |
| AGATCAT | 83  | GCCTCTG  | 118 | 54 |
| AGATCCA | 87  | GCGAAGA  | 118 | 54 |
| AGATCCC | 43  | GCGAAGA  | 118 | 54 |
| AGATCCG | 36  | GCGACCC  | 118 | 54 |
| AGATCCT | 83  | GCGGAGA  | 118 | 54 |
| AGATCGA | 51  | GCGGCCGA | 118 | 54 |
| AGATCGC | 18  | GCGGGCC  | 118 | 54 |
| AGATCGG | 22  | GCGTACG  | 118 | 54 |
| AGATCGT | 29  | GCGTCGA  | 118 | 54 |
| AGATCTA | 79  | GCGTCGA  | 118 | 54 |
| AGATCTC | 79  | GCTCGAC  | 118 | 54 |
| AGATCTG | 32  | GGAACCA  | 118 | 54 |
| AGATCTT | 72  | GGACCAG  | 118 | 54 |
| AGATGAA | 119 | GGACTTC  | 118 | 54 |
| AGATGAC | 54  | GGATACA  | 118 | 54 |
| AGATGAG | 69  | GGCCAGG  | 118 | 54 |
| AGATGAT | 61  | GGCCCCA  | 118 | 54 |
| AGATGCA | 87  | GGCCCCC  | 118 | 54 |
| AGATGCC | 83  | GGCTCAA  | 118 | 54 |
| AGATGCG | 36  | GGGAAAG  | 118 | 54 |
| AGATGCT | 51  | GGGAGTT  | 118 | 54 |
| AGATGGA | 108 | GGGCGCC  | 118 | 54 |
| AGATGGC | 69  | GGGGGTC  | 118 | 54 |
| AGATGGG | 47  | GGGGTCG  | 237 | 54 |
| AGATGGT | 47  | GGGGTTT  | 118 | 54 |
| AGATGTA | 58  | GGGTTGG  | 118 | 54 |

|          |     |          |     |    |
|----------|-----|----------|-----|----|
| AGATGTC  | 61  | GGTAGCT  | 118 | 54 |
| AGATGTG  | 79  | GGTGGAT  | 237 | 54 |
| AGATGTT  | 101 | GTACCCC  | 118 | 54 |
| AGATTAA  | 87  | GTAGAAT  | 118 | 54 |
| AGATTAC  | 76  | GTAGCAG  | 118 | 54 |
| AGATTAG  | 43  | GTCCATG  | 118 | 54 |
| AGATTAT  | 101 | GTGTA CT | 118 | 54 |
| AGATTCA  | 72  | GTGTGCT  | 118 | 54 |
| AGATTCC  | 51  | GTTAGTA  | 118 | 54 |
| AGATTCCG | 47  | GTTCTGT  | 118 | 54 |
| AGATTCT  | 79  | GTTTACA  | 118 | 54 |
| AGATTGA  | 58  | GTTTCCC  | 237 | 54 |
| AGATTGC  | 29  | TAAGCAC  | 237 | 54 |
| AGATTGG  | 51  | TAATTGG  | 118 | 54 |
| AGATTGT  | 65  | TACATTA  | 118 | 54 |
| AGATTTA  | 97  | TAGCCAG  | 118 | 54 |
| AGATTT C | 87  | TATCCAA  | 118 | 54 |
| AGATTTG  | 115 | TATCCAC  | 118 | 54 |
| AGATTTT  | 148 | TATGTAC  | 237 | 54 |
| AGCAAAA  | 159 | TCGGCGG  | 118 | 54 |
| AGCAAAC  | 105 | TCTCGCT  | 118 | 54 |
| AGCAAAG  | 115 | TCTGCAC  | 118 | 54 |
| AGCAAAT  | 115 | TGAAAGC  | 118 | 54 |
| AGCAACA  | 101 | TGCGTTT  | 118 | 54 |
| AGCAACC  | 51  | TGGTGGA  | 473 | 54 |
| AGCAACG  | 51  | TGTTTCG  | 118 | 54 |
| AGCAACT  | 79  | TTCGCCG  | 118 | 54 |
| AGCAAGA  | 108 | TTCGTCT  | 118 | 54 |
| AGCAAGC  | 115 | TTCTGCT  | 118 | 54 |
| AGCAAGG  | 90  | TTGGTCC  | 118 | 54 |
| AGCAAGT  | 65  | TTTCCCG  | 118 | 54 |
| AGCAATA  | 76  | TTTCGCT  | 118 | 54 |
| AGCAATC  | 115 | AAACTGC  | 118 | 51 |
| AGCAATG  | 43  | AAATCGA  | 118 | 51 |
| AGCAATT  | 58  | AACAGAC  | 118 | 51 |
| AGCACAA  | 105 | AACCACG  | 118 | 51 |
| AGCACAC  | 87  | AACGAGG  | 118 | 51 |
| AGCACAG  | 47  | AAGCTAC  | 118 | 51 |
| AGCACAT  | 65  | AATAAGC  | 118 | 51 |
| AGCACCA  | 76  | AATGCCT  | 118 | 51 |
| AGCACCC  | 32  | ACACTTG  | 118 | 51 |
| AGCACCG  | 72  | ACCAAGG  | 118 | 51 |
| AGCACCT  | 51  | ACCAAGT  | 118 | 51 |
| AGCACGA  | 58  | ACCAGTG  | 118 | 51 |
| AGCACGC  | 61  | ACCGGGG  | 118 | 51 |
| AGCACGG  | 40  | ACCTCTC  | 118 | 51 |
| AGCACGT  | 40  | ACGAACA  | 118 | 51 |
| AGCACTA  | 47  | ACGTACC  | 118 | 51 |
| AGCACTA  | 47  | ACTCTGT  | 118 | 51 |
| AGCACTC  | 43  | AGAAGCC  | 118 | 51 |
| AGCACTT  | 47  | AGAGACT  | 118 | 51 |
| AGCAGAA  | 36  | AGAGTCG  | 118 | 51 |

|         |     |          |     |    |
|---------|-----|----------|-----|----|
| AGCAGAC | 54  | AGATCGA  | 118 | 51 |
| AGCAGAG | 54  | AGCAACG  | 118 | 51 |
| AGCAGAT | 79  | AGCCATA  | 118 | 51 |
| AGCAGCA | 180 | AGCTTGA  | 118 | 51 |
| AGCAGCC | 65  | AGGCCCC  | 118 | 51 |
| AGCAGCG | 72  | AGTTATG  | 118 | 51 |
| AGCAGCT | 61  | AGTTGGA  | 118 | 51 |
| AGCAGGA | 47  | AGTTTAC  | 118 | 51 |
| AGCAGGC | 83  | AGTTTGG  | 118 | 51 |
| AGCAGGG | 32  | ATCGATG  | 118 | 51 |
| AGCAGGT | 18  | ATCGCCG  | 118 | 51 |
| AGCAGTA | 58  | ATTGGAT  | 237 | 51 |
| AGCAGTC | 65  | ATTTGGG  | 118 | 51 |
| AGCAGTG | 61  | CAAACCG  | 118 | 51 |
| AGCAGTT | 14  | CAACCGA  | 237 | 51 |
| AGCATAA | 61  | CACACGA  | 237 | 51 |
| AGCATAC | 79  | CACCACG  | 237 | 51 |
| AGCATAG | 40  | CACTCTG  | 118 | 51 |
| AGCATAT | 90  | CAGATGA  | 118 | 51 |
| AGCATCA | 76  | CAGCTTG  | 237 | 51 |
| AGCATCC | 43  | CATGCGT  | 118 | 51 |
| AGCATCG | 36  | CATTATC  | 118 | 51 |
| AGCATCT | 61  | CATTATG  | 118 | 51 |
| AGCATGA | 61  | CCACAAC  | 118 | 51 |
| AGCATGC | 76  | CCACGAC  | 118 | 51 |
| AGCATGG | 61  | CCATCGT  | 118 | 51 |
| AGCATGT | 54  | CCCAATT  | 118 | 51 |
| AGCATA  | 51  | CCCACAG  | 118 | 51 |
| AGCATT  | 61  | CCCAGGC  | 237 | 51 |
| AGCATTG | 54  | CCCGGTT  | 118 | 51 |
| AGCATTT | 87  | CCCTCGC  | 237 | 51 |
| AGCCAAA | 119 | CCGCGCA  | 118 | 51 |
| AGCCAAC | 97  | CCGTGTG  | 118 | 51 |
| AGCCAAG | 108 | CGAAGCC  | 118 | 51 |
| AGCCAAT | 87  | CGACCCA  | 118 | 51 |
| AGCCACA | 90  | CGCAACC  | 118 | 51 |
| AGCCACC | 87  | CGCAGCC  | 118 | 51 |
| AGCCACG | 54  | CGCATCC  | 118 | 51 |
| AGCCACT | 61  | CGCCCTG  | 118 | 51 |
| AGCCAGA | 61  | CGCGCGT  | 118 | 51 |
| AGCCAGC | 144 | CGGCCCC  | 473 | 51 |
| AGCCAGG | 51  | CGTCGAG  | 237 | 51 |
| AGCCAGT | 47  | CGTTTCC  | 118 | 51 |
| AGCCATA | 51  | CTCCTTA  | 237 | 51 |
| AGCCATC | 65  | CTGAGAG  | 118 | 51 |
| AGCCATG | 65  | CTGATCT  | 118 | 51 |
| AGCCATT | 65  | CTGCGCG  | 118 | 51 |
| AGCCCAA | 105 | CTGGACC  | 118 | 51 |
| AGCCCAC | 61  | CTGTTCCG | 118 | 51 |
| AGCCCAG | 65  | CTTCAGA  | 118 | 51 |
| AGCCCAT | 72  | CTTCCGG  | 118 | 51 |
| AGCCCCA | 65  | CTTCGCC  | 118 | 51 |

|         |    |          |     |    |
|---------|----|----------|-----|----|
| AGCCCC  | 54 | CTTGAAC  | 118 | 51 |
| AGCCCCG | 40 | CTTGGTC  | 118 | 51 |
| AGCCCCT | 54 | GAAACCC  | 118 | 51 |
| AGCCCGA | 54 | GAGAACA  | 237 | 51 |
| AGCCCGC | 65 | GAGACTA  | 118 | 51 |
| AGCCCGG | 40 | GAGCCTA  | 118 | 51 |
| AGCCCGT | 40 | GAGGGTC  | 118 | 51 |
| AGCCCTA | 51 | GAGTGTG  | 237 | 51 |
| AGCCCTC | 76 | GATCTTA  | 118 | 51 |
| AGCCCTG | 58 | GATGGAA  | 118 | 51 |
| AGCCCTT | 47 | GATTCTC  | 118 | 51 |
| AGCCGAA | 36 | GCAACTG  | 118 | 51 |
| AGCCGAC | 22 | GCAATTT  | 118 | 51 |
| AGCCGAG | 58 | GCAGAGC  | 118 | 51 |
| AGCCGAT | 32 | GCAGCCC  | 237 | 51 |
| AGCCGCA | 87 | GCAGCTG  | 118 | 51 |
| AGCCGCC | 65 | GCAGGAC  | 118 | 51 |
| AGCCGCG | 47 | GCATCAA  | 118 | 51 |
| AGCCGCT | 36 | GCCAATC  | 118 | 51 |
| AGCCGGA | 40 | GCCCCTT  | 118 | 51 |
| AGCCGGC | 36 | GCCGAGC  | 118 | 51 |
| AGCCGGG | 22 | GCCGCAA  | 118 | 51 |
| AGCCGGT | 54 | GCCTAAA  | 118 | 51 |
| AGCCGTA | 29 | GCCTCAG  | 118 | 51 |
| AGCCGTC | 43 | GCGGGGG  | 118 | 51 |
| AGCCGTG | 65 | GCGTCAC  | 118 | 51 |
| AGCCGTT | 51 | GCTCTCG  | 118 | 51 |
| AGCCTAA | 54 | GGATGAT  | 118 | 51 |
| AGCCTAC | 54 | GGATTAC  | 118 | 51 |
| AGCCTAG | 69 | GGATTCC  | 118 | 51 |
| AGCCTAT | 83 | GGCATT A | 118 | 51 |
| AGCCTCA | 76 | GGCCTTT  | 237 | 51 |
| AGCCTCA | 76 | GGCGTCA  | 118 | 51 |
| AGCCTCG | 40 | GGCGTCG  | 118 | 51 |
| AGCCTCT | 47 | GGCTCGA  | 118 | 51 |
| AGCCTGA | 22 | GGGCTTT  | 118 | 51 |
| AGCCTGC | 40 | GGGGGCA  | 118 | 51 |
| AGCCTGG | 51 | GGGGGGT  | 118 | 51 |
| AGCCTGT | 18 | GGGGTAA  | 118 | 51 |
| AGCCTTA | 25 | GGGTTTA  | 118 | 51 |
| AGCCTTC | 69 | GGTTAGA  | 118 | 51 |
| AGCCTTG | 61 | GTAAAGG  | 118 | 51 |
| AGCCTTT | 79 | GTA CTCC | 118 | 51 |
| AGCGAAA | 65 | GTCCTTC  | 118 | 51 |
| AGCGAAC | 32 | GTCGGCG  | 118 | 51 |
| AGCGAAG | 69 | GTCTGGT  | 118 | 51 |
| AGCGAAT | 40 | GTGCCTC  | 118 | 51 |
| AGCGACA | 61 | GTGGACA  | 118 | 51 |
| AGCGACC | 29 | GTGGACC  | 118 | 51 |
| AGCGACG | 32 | GTGGATT  | 237 | 51 |
| AGCGACT | 58 | GTGGGGC  | 118 | 51 |
| AGCGAGA | 40 | GTTAGCA  | 118 | 51 |

|         |    |         |     |    |
|---------|----|---------|-----|----|
| AGCGAGC | 76 | GTTTGTC | 118 | 51 |
| AGCGAGG | 36 | TAACGAG | 237 | 51 |
| AGCGAGT | 47 | TAAGTAC | 118 | 51 |
| AGCGATA | 7  | TACCATC | 237 | 51 |
| AGCGATC | 61 | TACCCCC | 118 | 51 |
| AGCGATG | 36 | TACCTAT | 118 | 51 |
| AGCGATT | 32 | TACGTAG | 118 | 51 |
| AGCGCAA | 32 | TAGATCA | 118 | 51 |
| AGCGCAC | 4  | TAGCACG | 118 | 51 |
| AGCGCAG | 47 | TAGGTCT | 118 | 51 |
| AGCGCAT | 29 | TAGTCAC | 118 | 51 |
| AGCGCCA | 51 | TATCCAG | 118 | 51 |
| AGCGCCC | 25 | TATGGCC | 118 | 51 |
| AGCGCCG | 36 | TCACAAT | 118 | 51 |
| AGCGCCT | 25 | TCATTAG | 118 | 51 |
| AGCGCGA | 22 | TCCCTCG | 118 | 51 |
| AGCGCGC | 40 | TCGATTG | 118 | 51 |
| AGCGCGG | 25 | TCGTCAC | 237 | 51 |
| AGCGCGT | 14 | TCTCAGA | 237 | 51 |
| AGCGCTA | 29 | TCTGCTA | 118 | 51 |
| AGCGCTC | 14 | TGACAGT | 118 | 51 |
| AGCGCTG | 43 | TGACTGC | 118 | 51 |
| AGCGCTT | 29 | TGCATCC | 118 | 51 |
| AGCGGAA | 22 | TGCGCGT | 118 | 51 |
| AGCGGAC | 40 | TGCTGAC | 118 | 51 |
| AGCGGAG | 69 | TGGCCTT | 118 | 51 |
| AGCGGAT | 47 | TGGGCTA | 118 | 51 |
| AGCGGCA | 58 | TGGGGGC | 118 | 51 |
| AGCGGCC | 51 | TTACTAC | 118 | 51 |
| AGCGGCG | 22 | TTATGGC | 118 | 51 |
| AGCGGCT | 25 | TTGCGCG | 118 | 51 |
| AGCGGGA | 25 | TTGGGAT | 118 | 51 |
| AGCGGGA | 25 | TTTAACC | 118 | 51 |
| AGCGGGC | 32 | AACGCAA | 118 | 47 |
| AGCGGGG | 29 | AAGCACT | 118 | 47 |
| AGCGGTA | 25 | AAGCTGC | 118 | 47 |
| AGCGGTC | 47 | AATATCC | 237 | 47 |
| AGCGGTG | 29 | AATCGAT | 118 | 47 |
| AGCGGTT | 22 | AATGCGT | 118 | 47 |
| AGCGTAA | 22 | ACACACT | 118 | 47 |
| AGCGTAC | 7  | ACAGACA | 118 | 47 |
| AGCGTAG | 7  | ACCTAAC | 118 | 47 |
| AGCGTAT | 25 | ACGCAA  | 118 | 47 |
| AGCGTCA | 32 | ACTGGAC | 118 | 47 |
| AGCGTCC | 18 | ACTTGAA | 118 | 47 |
| AGCGTCG | 36 | AGATGGG | 118 | 47 |
| AGCGTCT | 14 | AGCAGGA | 118 | 47 |
| AGCGTGA | 22 | AGCCAGT | 118 | 47 |
| AGCGTGC | 29 | AGCCGCG | 118 | 47 |
| AGCGTGG | 47 | AGGCTGT | 355 | 47 |
| AGCGTGT | 51 | AGTCGTC | 118 | 47 |
| AGCGTTA | 18 | AGTGTGT | 118 | 47 |



|         |     |         |     |    |
|---------|-----|---------|-----|----|
| AGCGTTC | 11  | ATAATGG | 118 | 47 |
| AGCGTTG | 18  | ATACGTA | 118 | 47 |
| AGCGTTT | 65  | ATAGTAG | 118 | 47 |
| AGCTAAA | 162 | ATATCCC | 355 | 47 |
| AGCTAAC | 61  | ATATCGG | 118 | 47 |
| AGCTAAG | 51  | ATCCGCC | 118 | 47 |
| AGCTAAT | 87  | ATCGAAC | 118 | 47 |
| AGCTACA | 72  | ATCGAAT | 118 | 47 |
| AGCTACC | 58  | ATCGGCC | 118 | 47 |
| AGCTACG | 29  | ATCTGCA | 118 | 47 |
| AGCTACT | 58  | ATGACTG | 118 | 47 |
| AGCTAGA | 69  | ATGGTCA | 118 | 47 |
| AGCTAGC | 195 | CAACGAG | 118 | 47 |
| AGCTAGG | 76  | CAAGTAG | 118 | 47 |
| AGCTAGT | 115 | CACCGAA | 118 | 47 |
| AGCTATA | 141 | CACGCGA | 237 | 47 |
| AGCTATC | 54  | CACTCCC | 237 | 47 |
| AGCTATG | 83  | CAGCCGT | 118 | 47 |
| AGCTATT | 90  | CAGGCAA | 118 | 47 |
| AGCTCAA | 65  | CAGGGAG | 118 | 47 |
| AGCTCAC | 54  | CAGGTAA | 118 | 47 |
| AGCTCAG | 83  | CAGTGAG | 118 | 47 |
| AGCTCAT | 94  | CAGTGGC | 118 | 47 |
| AGCTCCA | 105 | CAGTTGG | 118 | 47 |
| AGCTCCC | 69  | CATCACG | 118 | 47 |
| AGCTCCG | 29  | CATGGGT | 118 | 47 |
| AGCTCCT | 65  | CCACGTG | 237 | 47 |
| AGCTCGA | 65  | CCAGTGA | 118 | 47 |
| AGCTCGC | 40  | CCATCGG | 118 | 47 |
| AGCTCGG | 54  | CCGATCT | 118 | 47 |
| AGCTCGT | 65  | CCGCAAC | 118 | 47 |
| AGCTCTA | 47  | CCGCCTG | 118 | 47 |
| AGCTCTC | 72  | CCTTCGC | 118 | 47 |
| AGCTCTG | 43  | CGAGGCC | 118 | 47 |
| AGCTCTT | 83  | CGCCACG | 237 | 47 |
| AGCTGAA | 76  | CGGCACG | 118 | 47 |
| AGCTGAC | 43  | CGGCTAG | 118 | 47 |
| AGCTGAG | 51  | CGGGGGG | 118 | 47 |
| AGCTGAT | 43  | CTACTCT | 118 | 47 |
| AGCTGCA | 65  | CTACTGC | 118 | 47 |
| AGCTGCC | 65  | CTAGGTC | 118 | 47 |
| AGCTGCG | 43  | CTCAACG | 118 | 47 |
| AGCTGCT | 72  | CTCGCTT | 118 | 47 |
| AGCTGGA | 25  | CTGACTG | 118 | 47 |
| AGCTGGC | 76  | CTGATTG | 118 | 47 |
| AGCTGGG | 51  | GACTION | 118 | 47 |
| AGCTGGT | 36  | GAGCTTG | 118 | 47 |
| AGCTGTA | 43  | GAGGGGC | 118 | 47 |
| AGCTGTC | 51  | GATCTGA | 118 | 47 |
| AGCTGTG | 36  | GATGTAC | 118 | 47 |
| AGCTGTT | 36  | GCAACCT | 118 | 47 |
| AGCTTAA | 76  | GCAATCC | 118 | 47 |

|         |     |         |     |    |
|---------|-----|---------|-----|----|
| AGCTTAC | 25  | GCACTGC | 237 | 47 |
| AGCTTAG | 25  | GCAGATG | 118 | 47 |
| AGCTTAT | 25  | GCAGTGG | 118 | 47 |
| AGCTTCA | 43  | GCAGTTG | 118 | 47 |
| AGCTTCC | 54  | GCCAGGC | 118 | 47 |
| AGCTTCG | 47  | GCGGCAT | 118 | 47 |
| AGCTTCT | 112 | GCGTGCC | 118 | 47 |
| AGCTTGA | 51  | GCGTGTA | 118 | 47 |
| AGCTTGC | 65  | GCTACGT | 118 | 47 |
| AGCTTGG | 32  | GCTATGT | 118 | 47 |
| AGCTTGT | 94  | GCTGCCC | 118 | 47 |
| AGCTTTA | 58  | GCTGGCC | 118 | 47 |
| AGCTTTC | 94  | GCTTCCA | 118 | 47 |
| AGCTTTG | 112 | GCTTCCG | 237 | 47 |
| AGCTTTT | 126 | GGAAGCT | 118 | 47 |
| AGGAAAA | 144 | GGACATG | 118 | 47 |
| AGGAAAC | 79  | GGATCCG | 118 | 47 |
| AGGAAAG | 101 | GGCCCAG | 118 | 47 |
| AGGAAAT | 90  | GGCCCCG | 237 | 47 |
| AGGAACA | 54  | GGCCCTT | 118 | 47 |
| AGGAACC | 58  | GGCGCCC | 118 | 47 |
| AGGAACG | 40  | GGCGGCT | 118 | 47 |
| AGGAACT | 65  | GGCTACT | 237 | 47 |
| AGGAAGA | 152 | GGCTAGA | 118 | 47 |
| AGGAAGC | 58  | GGCTCGC | 118 | 47 |
| AGGAAGG | 69  | GGCTCTA | 118 | 47 |
| AGGAAGT | 51  | GGGGCGC | 118 | 47 |
| AGGAATA | 40  | GGGGGCG | 118 | 47 |
| AGGAATC | 58  | GGTCGGA | 118 | 47 |
| AGGAATG | 47  | GTAAGTA | 118 | 47 |
| AGGAATT | 47  | GTATTGA | 118 | 47 |
| AGGACAA | 65  | GTCACAA | 237 | 47 |
| AGGACAC | 32  | GTCATTA | 118 | 47 |
| AGGACAG | 18  | GTTAAAC | 118 | 47 |
| AGGACAT | 40  | GTTGCCG | 118 | 47 |
| AGGACCA | 47  | TAACATG | 118 | 47 |
| AGGACCC | 36  | TAACGTG | 118 | 47 |
| AGGACCG | 14  | TACAGAC | 118 | 47 |
| AGGACCT | 43  | TACCTAA | 118 | 47 |
| AGGACGA | 65  | TACGTGT | 118 | 47 |
| AGGACGC | 22  | TAGTGGC | 118 | 47 |
| AGGACGG | 47  | TCAGGTA | 118 | 47 |
| AGGACGT | 40  | TCCCGCC | 118 | 47 |
| AGGACTA | 47  | TCCCGTC | 118 | 47 |
| AGGACTA | 47  | TCGACTG | 118 | 47 |
| AGGACTC | 36  | TCGCAAG | 118 | 47 |
| AGGACTG | 29  | TCGTTAT | 237 | 47 |
| AGGAGAA | 97  | TCTGGTT | 118 | 47 |
| AGGAGAC | 58  | TGAAGCT | 118 | 47 |
| AGGAGAG | 115 | TGCAATT | 118 | 47 |
| AGGAGAT | 47  | TGCGCAG | 118 | 47 |
| AGGAGCA | 72  | TGCGGAG | 355 | 47 |

|         |     |         |     |    |
|---------|-----|---------|-----|----|
| AGGAGCC | 69  | TGCGTCC | 118 | 47 |
| AGGAGCG | 25  | TGGAGCC | 118 | 47 |
| AGGAGCT | 79  | TGGCCGC | 118 | 47 |
| AGGAGGA | 162 | TGGCTCG | 237 | 47 |
| AGGAGGC | 65  | TGGGGCC | 118 | 47 |
| AGGAGGG | 51  | TGGTCTT | 118 | 47 |
| AGGAGGT | 40  | TGTGCTG | 118 | 47 |
| AGGAGTA | 97  | TTAGAAG | 118 | 47 |
| AGGAGTC | 40  | TTCAGCC | 118 | 47 |
| AGGAGTG | 61  | TTGCACG | 118 | 47 |
| AGGAGTT | 72  | TTGGGTA | 118 | 47 |
| AGGATAA | 61  | TTTCGCA | 118 | 47 |
| AGGATAC | 47  | AAAGCTG | 118 | 43 |
| AGGATAG | 47  | AACCGAC | 118 | 43 |
| AGGATAT | 51  | AACGTGT | 118 | 43 |
| AGGATCA | 54  | AAGCCCC | 118 | 43 |
| AGGATCC | 43  | AAGGCC  | 118 | 43 |
| AGGATCG | 36  | AAGTAGC | 118 | 43 |
| AGGATCT | 29  | AATCACA | 118 | 43 |
| AGGATGA | 69  | ACAATGC | 118 | 43 |
| AGGATGC | 43  | ACACCGT | 118 | 43 |
| AGGATGG | 36  | ACACGAG | 237 | 43 |
| AGGATGT | 40  | ACACTGC | 118 | 43 |
| AGGATTA | 54  | ACATCGA | 118 | 43 |
| AGGATTC | 51  | ACTCCAG | 118 | 43 |
| AGGATTG | 97  | ACTGTTG | 118 | 43 |
| AGGATTT | 54  | AGCACTC | 118 | 43 |
| AGGCAAA | 65  | AGCCGTC | 118 | 43 |
| AGGCAAC | 54  | AGCTGCG | 118 | 43 |
| AGGCAAG | 69  | AGGATCC | 118 | 43 |
| AGGCAAT | 18  | AGGGCCC | 118 | 43 |
| AGGCACA | 54  | AGGTGGG | 118 | 43 |
| AGGCACC | 25  | AGTACTG | 118 | 43 |
| AGGCACG | 43  | ATAGACC | 118 | 43 |
| AGGCACT | 47  | ATCTCCT | 118 | 43 |
| AGGCAGA | 29  | ATGCGTC | 118 | 43 |
| AGGCAGC | 87  | ATGCTAA | 118 | 43 |
| AGGCAGG | 61  | ATTCAGC | 118 | 43 |
| AGGCAGT | 18  | ATTGTGC | 118 | 43 |
| AGGCATA | 36  | CAACACT | 118 | 43 |
| AGGCATC | 79  | CAAGTGT | 118 | 43 |
| AGGCATG | 69  | CACTCTT | 118 | 43 |
| AGGCATT | 43  | CAGGTGG | 118 | 43 |
| AGGCCAA | 69  | CATCCGC | 118 | 43 |
| AGGCCAC | 69  | CCACGAA | 118 | 43 |
| AGGCCAG | 32  | CCCCGCA | 118 | 43 |
| AGGCCAT | 65  | CCCTAGA | 118 | 43 |
| AGGCCCA | 36  | CCCTGTA | 118 | 43 |
| AGGCCCC | 51  | CCGGGGG | 118 | 43 |
| AGGCCCG | 22  | CCGGTCT | 118 | 43 |
| AGGCCCT | 47  | CCGTCAC | 118 | 43 |
| AGGCCGA | 47  | CCTCGAC | 118 | 43 |

|         |    |         |     |    |
|---------|----|---------|-----|----|
| AGGCCGC | 32 | CCTCTAT | 118 | 43 |
| AGGCCGG | 79 | CCTGCAT | 118 | 43 |
| AGGCCGT | 7  | CGACTGC | 118 | 43 |
| AGGCCTA | 51 | CGAGAGC | 118 | 43 |
| AGGCCTC | 32 | CGATCTG | 118 | 43 |
| AGGCCTG | 36 | CGCCCGT | 118 | 43 |
| AGGCCTT | 47 | CGTCCAA | 118 | 43 |
| AGGCGAA | 36 | CTAACCC | 118 | 43 |
| AGGCGAC | 36 | CTCCCTA | 118 | 43 |
| AGGCGAG | 58 | CTGAGGC | 118 | 43 |
| AGGCGAT | 25 | CTGGCCT | 118 | 43 |
| AGGCGCA | 29 | CTGTGCC | 118 | 43 |
| AGGCGCC | 40 | CTTAGAA | 118 | 43 |
| AGGCGCG | 69 | CTTATGC | 118 | 43 |
| AGGCGCT | 25 | CTTCACG | 118 | 43 |
| AGGCGGA | 29 | GACATGC | 118 | 43 |
| AGGCGGC | 72 | GACCATC | 118 | 43 |
| AGGCGGG | 29 | GACCCAT | 118 | 43 |
| AGGCGGT | 40 | GACCGAT | 118 | 43 |
| AGGCGTA | 14 | GAGAGAC | 237 | 43 |
| AGGCGTC | 32 | GAGATAC | 118 | 43 |
| AGGCGTG | 29 | GAGCCGA | 118 | 43 |
| AGGCGTT | 14 | GAGTGGG | 118 | 43 |
| AGGCTAA | 54 | GATAAGC | 118 | 43 |
| AGGCTAC | 43 | GATCACA | 118 | 43 |
| AGGCTAG | 47 | GCACGTG | 118 | 43 |
| AGGCTAT | 54 | GCAGATC | 118 | 43 |
| AGGCTCA | 32 | GCCCCGG | 118 | 43 |
| AGGCTCA | 32 | GCCGCGG | 118 | 43 |
| AGGCTCC | 58 | GCGCAA  | 118 | 43 |
| AGGCTCT | 43 | GCGCCGG | 118 | 43 |
| AGGCTGA | 58 | GCGGCTA | 118 | 43 |
| AGGCTGC | 40 | GCGTCCT | 118 | 43 |
| AGGCTGG | 43 | GCTGCGC | 118 | 43 |
| AGGCTGT | 47 | GGCACTG | 118 | 43 |
| AGGCTTA | 51 | GGGCTGG | 118 | 43 |
| AGGCTTC | 29 | GGTCAAA | 118 | 43 |
| AGGCTTG | 54 | GGTGGAC | 237 | 43 |
| AGGCTTT | 61 | GTACAAT | 118 | 43 |
| AGGGA   | 94 | GTCAGCT | 118 | 43 |
| AGGGAAC | 40 | GTCCACA | 118 | 43 |
| AGGGAAG | 76 | GTCCCCG | 118 | 43 |
| AGGGAAT | 40 | GTCCCTC | 118 | 43 |
| AGGGACA | 47 | GTCGCGC | 118 | 43 |
| AGGGACC | 58 | GTCGCTA | 118 | 43 |
| AGGGACG | 51 | GTCGTTT | 118 | 43 |
| AGGGACT | 54 | GTCTGCA | 118 | 43 |
| AGGGAGA | 90 | GTGCCGT | 118 | 43 |
| AGGGAGC | 58 | GTGCTCG | 118 | 43 |
| AGGGAGG | 61 | GTTACTT | 118 | 43 |
| AGGGAGT | 69 | GTTAGTG | 118 | 43 |
| AGGGATA | 36 | GTTCCCC | 118 | 43 |

|         |     |         |     |    |
|---------|-----|---------|-----|----|
| AGGGATC | 32  | TAACTGG | 118 | 43 |
| AGGGATG | 29  | TACAGCT | 118 | 43 |
| AGGGATT | 32  | TAGACCC | 118 | 43 |
| AGGGCAA | 79  | TAGGGGT | 118 | 43 |
| AGGGCAC | 36  | TATACGT | 118 | 43 |
| AGGGCAG | 43  | TCACCGG | 237 | 43 |
| AGGGCAT | 79  | TCAGAGC | 118 | 43 |
| AGGGCCA | 29  | TCAGCGA | 118 | 43 |
| AGGGCCC | 43  | TCCAGGT | 118 | 43 |
| AGGGCCG | 61  | TCCCCAG | 118 | 43 |
| AGGGCCT | 51  | TCCGGCG | 118 | 43 |
| AGGGCGA | 47  | TCCGGGT | 118 | 43 |
| AGGGCGC | 40  | TCGAATG | 118 | 43 |
| AGGGCGG | 32  | TCGAGGC | 118 | 43 |
| AGGGCGT | 32  | TCGCTTG | 118 | 43 |
| AGGGCTA | 36  | TCGGAGC | 118 | 43 |
| AGGGCTC | 54  | TGCCACA | 118 | 43 |
| AGGGCTG | 43  | TGCGCCC | 118 | 43 |
| AGGGCTT | 43  | TGCGGTT | 118 | 43 |
| AGGGGAA | 54  | TGCTCGA | 118 | 43 |
| AGGGGAC | 36  | TGGCAGG | 118 | 43 |
| AGGGGAG | 83  | TTCACAC | 118 | 43 |
| AGGGGAT | 61  | TTCAGT  | 118 | 43 |
| AGGGGCA | 61  | TTCGCTC | 118 | 43 |
| AGGGGCC | 51  | TTGCGTT | 118 | 43 |
| AGGGGCG | 47  | TTTGCTG | 118 | 43 |
| AGGGGCT | 18  | AATAGAC | 118 | 40 |
| AGGGGGA | 105 | AATCCCC | 118 | 40 |
| AGGGGGC | 47  | ACAACCG | 118 | 40 |
| AGGGGGG | 69  | ACAGTTA | 118 | 40 |
| AGGGGGT | 40  | ACGGCCT | 118 | 40 |
| AGGGGTA | 40  | ACGTGGG | 118 | 40 |
| AGGGGTC | 47  | ACGTGTC | 118 | 40 |
| AGGGGTG | 22  | ACTCGAA | 118 | 40 |
| AGGGGTT | 65  | ACTGAGA | 118 | 40 |
| AGGGTAA | 43  | AGACAAG | 118 | 40 |
| AGGGTAC | 36  | AGAGCAC | 118 | 40 |
| AGGGTAG | 36  | AGCACGT | 118 | 40 |
| AGGGTAT | 43  | AGCCCCG | 237 | 40 |
| AGGGTCA | 47  | AGCCTCG | 118 | 40 |
| AGGGTCC | 29  | AGCGCGC | 118 | 40 |
| AGGGTCG | 22  | AGGAATA | 118 | 40 |
| AGGGTCT | 54  | AGGGGTA | 118 | 40 |
| AGGGTGA | 69  | AGTTGCG | 118 | 40 |
| AGGGTGC | 40  | ATGCCTG | 118 | 40 |
| AGGGTGG | 29  | ATGGCGG | 118 | 40 |
| AGGGTGT | 51  | ATTGGTC | 118 | 40 |
| AGGGTTA | 29  | ATTTGCG | 118 | 40 |
| AGGGTTC | 32  | CAACTGT | 118 | 40 |
| AGGGTTG | 58  | CAAGCCG | 118 | 40 |
| AGGGTTT | 54  | CACAATG | 118 | 40 |
| AGGTAAA | 90  | CACGACC | 118 | 40 |

|         |     |         |     |    |
|---------|-----|---------|-----|----|
| AGGTAAC | 11  | CACTCAC | 118 | 40 |
| AGGTAAG | 40  | CACTGCG | 118 | 40 |
| AGGTAAT | 47  | CAGAGCA | 118 | 40 |
| AGGTACA | 32  | CAGTTAT | 118 | 40 |
| AGGTACC | 36  | CATCGAA | 355 | 40 |
| AGGTACG | 43  | CCAGAGC | 118 | 40 |
| AGGTACT | 29  | CCAGTCG | 118 | 40 |
| AGGTAGA | 51  | CCCAGCA | 118 | 40 |
| AGGTAGC | 25  | CCCCGGT | 237 | 40 |
| AGGTAGG | 43  | CCCGCAA | 118 | 40 |
| AGGTAGT | 25  | CCCGCCA | 118 | 40 |
| AGGTATA | 47  | CCGATGC | 118 | 40 |
| AGGTATC | 32  | CCGCTAC | 118 | 40 |
| AGGTATG | 54  | CCGTCGA | 118 | 40 |
| AGGTATT | 40  | CCTCAGG | 118 | 40 |
| AGGTCAA | 40  | CCTGTAC | 118 | 40 |
| AGGTCAC | 51  | CCTTCTA | 118 | 40 |
| AGGTCAG | 40  | CGAGCGG | 118 | 40 |
| AGGTCAT | 43  | CGCATCA | 118 | 40 |
| AGGTCCA | 43  | CGCCCGA | 118 | 40 |
| AGGTCCC | 58  | CGCGCAA | 118 | 40 |
| AGGTCCG | 54  | CGGCGAC | 118 | 40 |
| AGGTCCT | 40  | CGGCGGG | 118 | 40 |
| AGGTCEA | 43  | CGGCTAC | 118 | 40 |
| AGGTCEG | 51  | CGGCTCT | 118 | 40 |
| AGGTCEG | 32  | CGGGGTC | 118 | 40 |
| AGGTCEG | 51  | CGTCACA | 237 | 40 |
| AGGTCTA | 18  | CGTTGGT | 118 | 40 |
| AGGTCTC | 54  | CTAATAC | 118 | 40 |
| AGGTCTG | 25  | CTCGTTA | 237 | 40 |
| AGGTCTT | 61  | CTGACCT | 118 | 40 |
| AGGTGAA | 87  | CTTGCCG | 118 | 40 |
| AGGTGAC | 51  | GAACACC | 118 | 40 |
| AGGTGAG | 69  | GAAGCTT | 118 | 40 |
| AGGTGAT | 36  | GACCACA | 118 | 40 |
| AGGTGCA | 47  | GACCAGC | 118 | 40 |
| AGGTGCC | 32  | GACCTAA | 118 | 40 |
| AGGTGCG | 29  | GAGCCGC | 118 | 40 |
| AGGTGCT | 36  | GCAGGGA | 118 | 40 |
| AGGTGGA | 65  | GCATCGC | 118 | 40 |
| AGGTGGC | 40  | GCCAATG | 118 | 40 |
| AGGTGGG | 43  | GCCCAGG | 237 | 40 |
| AGGTGGT | 115 | GCCCCGC | 118 | 40 |
| AGGTGTA | 76  | GCCCGTC | 118 | 40 |
| AGGTGTC | 43  | GCCGTGT | 118 | 40 |
| AGGTGTG | 29  | GCCTGTC | 118 | 40 |
| AGGTGTT | 43  | GCGTCTT | 118 | 40 |
| AGGTTAA | 43  | GCTATCA | 118 | 40 |
| AGGTTAC | 25  | GCTCATA | 118 | 40 |
| AGGTTAG | 32  | GCTCTAC | 118 | 40 |
| AGGTTAT | 43  | GCTGCCA | 118 | 40 |
| AGGTTCA | 43  | GCTTGAA | 118 | 40 |

|          |     |         |     |    |
|----------|-----|---------|-----|----|
| AGGTTCC  | 32  | GGATCTC | 118 | 40 |
| AGGTTCCG | 58  | GGCAGGG | 237 | 40 |
| AGGTTCT  | 65  | GGCATCG | 118 | 40 |
| AGGTTGA  | 43  | GGGCTCC | 118 | 40 |
| AGGTTGC  | 47  | GGGGCAA | 118 | 40 |
| AGGTTGG  | 72  | GGGTCTC | 118 | 40 |
| AGGTTGT  | 61  | GGTTTCG | 237 | 40 |
| AGGTTTA  | 58  | GTAGAAG | 118 | 40 |
| AGGTTTA  | 58  | GTCGGAG | 118 | 40 |
| AGGTTTG  | 69  | GTCTAGT | 118 | 40 |
| AGGTTTT  | 83  | GTCTCAA | 118 | 40 |
| AGTAAAA  | 115 | GTGCCCA | 118 | 40 |
| AGTAAAC  | 32  | GTGCTGA | 118 | 40 |
| AGTAAAG  | 76  | GTGGCAG | 118 | 40 |
| AGTAAAT  | 115 | GTGTCAG | 118 | 40 |
| AGTAACA  | 58  | GTTCCAC | 118 | 40 |
| AGTAACC  | 7   | GTTGCGG | 118 | 40 |
| AGTAACG  | 32  | GTTTCGT | 237 | 40 |
| AGTAACT  | 40  | TACAATC | 118 | 40 |
| AGTAAGA  | 54  | TACCTAG | 118 | 40 |
| AGTAAGC  | 25  | TCCACTA | 118 | 40 |
| AGTAAGG  | 43  | TCCAGTC | 118 | 40 |
| AGTAAGT  | 54  | TCCGTCC | 237 | 40 |
| AGTAATA  | 94  | TCCGTGT | 237 | 40 |
| AGTAATC  | 43  | TCCTAAC | 118 | 40 |
| AGTAATG  | 32  | TCGAAGA | 118 | 40 |
| AGTAATT  | 76  | TCGGCCC | 118 | 40 |
| AGTACAA  | 51  | TCGTTAG | 118 | 40 |
| AGTACAC  | 47  | TCGTTGG | 118 | 40 |
| AGTACAG  | 47  | TCTGCGG | 118 | 40 |
| AGTACAT  | 58  | TCTGTCA | 118 | 40 |
| AGTACCA  | 65  | TGAGTGT | 118 | 40 |
| AGTACCC  | 36  | TGGCAAT | 118 | 40 |
| AGTACCG  | 4   | TGGCTAC | 118 | 40 |
| AGTACCT  | 40  | TGTCCGC | 118 | 40 |
| AGTACGA  | 22  | TGTGCCC | 118 | 40 |
| AGTACGC  | 22  | TGTTCGA | 118 | 40 |
| AGTACGG  | 11  | TTCCGGC | 237 | 40 |
| AGTACGT  | 40  | AAATCGC | 118 | 36 |
| AGTACTA  | 65  | AACATCG | 118 | 36 |
| AGTACTC  | 54  | AACTGGT | 118 | 36 |
| AGTACTG  | 43  | AAGACTC | 118 | 36 |
| AGTACTT  | 47  | AAGATCG | 118 | 36 |
| AGTAGAA  | 83  | AAGCCGC | 118 | 36 |
| AGTAGAC  | 43  | AAGTGTC | 118 | 36 |
| AGTAGAG  | 58  | AATGGTG | 237 | 36 |
| AGTAGAT  | 61  | ACAGTGC | 118 | 36 |
| AGTAGCA  | 69  | ACCACGC | 237 | 36 |
| AGTAGCC  | 32  | ACCATCG | 118 | 36 |
| AGTAGCG  | 18  | ACCCATT | 118 | 36 |
| AGTAGCT  | 61  | ACCTAGC | 118 | 36 |
| AGTAGGA  | 61  | ACCTATC | 118 | 36 |

|         |     |         |     |    |
|---------|-----|---------|-----|----|
| AGTAGGC | 47  | ACGACCA | 118 | 36 |
| AGTAGGG | 61  | ACGAGTC | 118 | 36 |
| AGTAGGT | 40  | ACGCGAC | 237 | 36 |
| AGTAGTA | 76  | ACGTAGT | 118 | 36 |
| AGTAGTC | 14  | ACGTCCG | 118 | 36 |
| AGTAGTG | 72  | ACGTGGT | 118 | 36 |
| AGTAGTT | 54  | ACTCCGC | 118 | 36 |
| AGTATAA | 112 | AGGCCCA | 118 | 36 |
| AGTATAC | 36  | AGGTGCT | 118 | 36 |
| AGTATAG | 58  | AGTCGCC | 118 | 36 |
| AGTATAT | 108 | ATCGATA | 118 | 36 |
| AGTATCA | 61  | ATGCTGT | 118 | 36 |
| AGTATCC | 32  | CAATGAG | 118 | 36 |
| AGTATCG | 11  | CACGAGG | 118 | 36 |
| AGTATCT | 43  | CAGCTAC | 118 | 36 |
| AGTATGA | 43  | CATATCG | 118 | 36 |
| AGTATGC | 29  | CATCGGG | 118 | 36 |
| AGTATGG | 36  | CCAGGTG | 118 | 36 |
| AGTATGT | 83  | CCCGGGA | 118 | 36 |
| AGTATTA | 65  | CCCGGTC | 118 | 36 |
| AGTATTC | 61  | CCGCGGG | 118 | 36 |
| AGTATTG | 32  | CCGCTCT | 118 | 36 |
| AGTATTT | 133 | CCGGGGA | 118 | 36 |
| AGTCAAA | 94  | CCGGGTT | 118 | 36 |
| AGTCAAA | 94  | CGCAAAC | 118 | 36 |
| AGTCAAC | 36  | CGCCCTA | 118 | 36 |
| AGTCAAT | 47  | CGCCCTA | 118 | 36 |
| AGTCACA | 61  | CGCCGAG | 118 | 36 |
| AGTCACC | 36  | CGCCTGT | 118 | 36 |
| AGTCACG | 7   | CGCGCTT | 118 | 36 |
| AGTCACT | 36  | CGCGGGG | 118 | 36 |
| AGTCAGA | 32  | CGCTTAT | 118 | 36 |
| AGTCAGC | 40  | CGCTTGC | 118 | 36 |
| AGTCAGG | 22  | CGGAAGC | 118 | 36 |
| AGTCAGT | 72  | CGGATTC | 118 | 36 |
| AGTCATA | 65  | CGGGGAA | 118 | 36 |
| AGTCATC | 43  | CGGGGGT | 118 | 36 |
| AGTCATG | 51  | CGTTATC | 118 | 36 |
| AGTCATT | 69  | CTAGTTC | 118 | 36 |
| AGTCCAA | 94  | CTCAGAG | 118 | 36 |
| AGTCCAC | 58  | CTCAGCA | 118 | 36 |
| AGTCCAG | 40  | CTCATCG | 118 | 36 |
| AGTCCAT | 54  | CTCCAGT | 118 | 36 |
| AGTCCCA | 40  | CTCGACC | 118 | 36 |
| AGTCCCC | 29  | CTCGTCA | 118 | 36 |
| AGTCCCG | 11  | CTCTACC | 118 | 36 |
| AGTCCCT | 54  | CTGAACA | 118 | 36 |
| AGTCCGA | 36  | CTGAGTT | 118 | 36 |
| AGTCCGC | 40  | CTGGCTC | 237 | 36 |
| AGTCCGG | 87  | CTGTCAG | 118 | 36 |
| AGTCCGT | 18  | CTTTCGC | 118 | 36 |
| AGTCCTA | 32  | GACCCGG | 118 | 36 |



|         |    |          |     |    |
|---------|----|----------|-----|----|
| AGTCCTC | 36 | GACGAAC  | 118 | 36 |
| AGTCCTG | 14 | GACGAAT  | 118 | 36 |
| AGTCCTT | 43 | GA CTCCG | 118 | 36 |
| AGTCGAA | 22 | GA CTGAG | 118 | 36 |
| AGTCGAC | 36 | GAGCGAT  | 118 | 36 |
| AGTCGAG | 29 | GAGCGGT  | 237 | 36 |
| AGTCGAT | 43 | GCCCCC   | 118 | 36 |
| AGTCGCA | 18 | GCGGTTG  | 118 | 36 |
| AGTCGCC | 36 | GCTACTG  | 118 | 36 |
| AGTCGCG | 11 | GCTACC   | 118 | 36 |
| AGTCGCT | 29 | GGACTGA  | 118 | 36 |
| AGTCGGA | 25 | GGCACGC  | 118 | 36 |
| AGTCGGC | 51 | GGCCCTC  | 118 | 36 |
| AGTCGGG | 11 | GGCGTCT  | 118 | 36 |
| AGTCGGT | 36 | GGGCCCT  | 237 | 36 |
| AGTCGTA | 22 | GGGCTCA  | 118 | 36 |
| AGTCGTC | 47 | GGGGCTC  | 118 | 36 |
| AGTCGTG | 18 | GGTCTCG  | 118 | 36 |
| AGTCGTT | 51 | GGTCTTC  | 118 | 36 |
| AGTCTAA | 40 | GTAAAAG  | 237 | 36 |
| AGTCTAC | 51 | GTA CTG  | 118 | 36 |
| AGTCTAG | 40 | GTATAAC  | 118 | 36 |
| AGTCTAT | 87 | GTTCGAA  | 118 | 36 |
| AGTCTCA | 36 | TAAAGGA  | 118 | 36 |
| AGTCTCC | 22 | TAAAGGA  | 118 | 36 |
| AGTCTCG | 36 | TAGAAGC  | 118 | 36 |
| AGTCTCT | 97 | TAGATGG  | 118 | 36 |
| AGTCTGA | 36 | TCAAGGC  | 118 | 36 |
| AGTCTGC | 40 | TCACGTG  | 118 | 36 |
| AGTCTGG | 25 | TCAGATA  | 118 | 36 |
| AGTCTGT | 54 | TCCTACC  | 118 | 36 |
| AGTCTTA | 47 | TCGAACA  | 118 | 36 |
| AGTCTTC | 51 | TCGCCCG  | 237 | 36 |
| AGTCTTG | 47 | TCGCTAA  | 118 | 36 |
| AGTCTTT | 76 | TCGCTCA  | 118 | 36 |
| AGTGAAA | 61 | TCGTACA  | 118 | 36 |
| AGTGAAC | 36 | TCGTCTG  | 118 | 36 |
| AGTGAAG | 76 | TCTGCTT  | 118 | 36 |
| AGTGAAT | 76 | TGCTAAG  | 118 | 36 |
| AGTGACA | 72 | TGCTATC  | 118 | 36 |
| AGTGACC | 47 | TGCTGCG  | 118 | 36 |
| AGTGACG | 47 | TGGACCC  | 118 | 36 |
| AGTGACT | 47 | TGGATCG  | 118 | 36 |
| AGTGAGA | 79 | TGGTCAA  | 118 | 36 |
| AGTGAGC | 54 | TGTCGCT  | 118 | 36 |
| AGTGAGG | 43 | TTAGAAC  | 118 | 36 |
| AGTGAGT | 65 | TTTCCGT  | 118 | 36 |
| AGTGATA | 54 | AACCTCG  | 118 | 32 |
| AGTGATC | 32 | AACGCAT  | 118 | 32 |
| AGTGATG | 94 | AAGCAGT  | 118 | 32 |
| AGTGATT | 69 | AAGGAAC  | 118 | 32 |
| AGTGCAA | 90 | ACAGACG  | 118 | 32 |

|          |     |         |     |    |
|----------|-----|---------|-----|----|
| AGTGCAC  | 32  | ACCCAGC | 118 | 32 |
| AGTGCAG  | 61  | ACCGTCG | 118 | 32 |
| AGTGCAT  | 83  | ACGCACC | 237 | 32 |
| AGTGCCA  | 76  | ACGCCGA | 118 | 32 |
| AGTGCCC  | 32  | ACGCCTC | 118 | 32 |
| AGTGCCG  | 25  | ACTATCC | 118 | 32 |
| AGTGCCT  | 43  | ACTCCCA | 118 | 32 |
| AGTGCGA  | 29  | AGATACG | 118 | 32 |
| AGTGCGC  | 25  | AGATCAC | 118 | 32 |
| AGTGCGG  | 47  | AGCGGGC | 118 | 32 |
| AGTGCGT  | 11  | AGGCGTC | 118 | 32 |
| AGTGCTA  | 79  | AGTAACG | 118 | 32 |
| AGTGCTC  | 69  | AGTGGCA | 118 | 32 |
| AGTGCTG  | 43  | ATTAGCA | 118 | 32 |
| AGTGCTT  | 76  | CACGAGT | 118 | 32 |
| AGTGGAA  | 69  | CAGCATA | 118 | 32 |
| AGTGGAC  | 54  | CAGGACG | 118 | 32 |
| AGTGGAG  | 61  | CAGGCAT | 118 | 32 |
| AGTGGAT  | 61  | CAGTGTT | 118 | 32 |
| AGTGGCA  | 32  | CCAACCG | 118 | 32 |
| AGTGGCC  | 43  | CCAACTG | 118 | 32 |
| AGTGGCG  | 22  | CCCCAGT | 118 | 32 |
| AGTGGCT  | 58  | CCCTGCG | 118 | 32 |
| AGTGGGA  | 51  | CCGAACG | 118 | 32 |
| AGTGGGC  | 25  | CCGAGAT | 118 | 32 |
| AGTGGGG  | 51  | CCGGCTA | 118 | 32 |
| AGTGGGT  | 43  | CCTAGTA | 118 | 32 |
| AGTGGTA  | 47  | CCTAGTA | 118 | 32 |
| AGTGGTC  | 51  | CGAACGC | 118 | 32 |
| AGTGGTG  | 105 | CGACACC | 118 | 32 |
| AGTGGTT  | 72  | CGACTCC | 118 | 32 |
| AGTGTA   | 69  | CGAGGTG | 118 | 32 |
| AGTGTAC  | 47  | CGCAAGC | 118 | 32 |
| AGTGTAG  | 51  | CGCAATG | 118 | 32 |
| AGTGTAT  | 40  | CGGCACT | 118 | 32 |
| AGTGTCA  | 69  | CGGGGAC | 118 | 32 |
| AGTGTCC  | 65  | CGGTGTA | 118 | 32 |
| AGTGTCCG | 32  | CGTACCC | 118 | 32 |
| AGTGTCT  | 72  | CGTCTGC | 118 | 32 |
| AGTGTGA  | 65  | CGTGGTT | 237 | 32 |
| AGTGTGC  | 40  | CGTTGAT | 118 | 32 |
| AGTGTGG  | 54  | CTAGTAC | 118 | 32 |
| AGTGTGT  | 47  | CTCACGT | 118 | 32 |
| AGTGTTA  | 79  | CTCCGTG | 237 | 32 |
| AGTGTTT  | 51  | CTGAGGG | 118 | 32 |
| AGTGTTG  | 105 | CTGGTGA | 118 | 32 |
| AGTGTTT  | 83  | GAACAGT | 118 | 32 |
| AGTTAAA  | 112 | GAACGGA | 118 | 32 |
| AGTTAAC  | 29  | GAACGGA | 118 | 32 |
| AGTTAAG  | 29  | GACCAGT | 118 | 32 |
| AGTTAAT  | 94  | GAGATCG | 118 | 32 |
| AGTTACA  | 22  | GAGTCGC | 118 | 32 |

|         |     |          |     |    |
|---------|-----|----------|-----|----|
| AGTTACC | 29  | GATAGTA  | 118 | 32 |
| AGTTACG | 22  | GCACCCT  | 118 | 32 |
| AGTTACT | 54  | GCAGGGT  | 118 | 32 |
| AGTTAGA | 32  | GCCATTC  | 118 | 32 |
| AGTTAGA | 32  | GCCCCGA  | 118 | 32 |
| AGTTAGG | 54  | GCCGCCT  | 118 | 32 |
| AGTTAGT | 90  | GCGACAC  | 118 | 32 |
| AGTTATA | 76  | GCGACAG  | 118 | 32 |
| AGTTATC | 40  | GCGATCG  | 118 | 32 |
| AGTTATG | 51  | GCGGACA  | 118 | 32 |
| AGTTATT | 61  | GCTCCGA  | 118 | 32 |
| AGTTCAA | 58  | GCTGACT  | 118 | 32 |
| AGTTCAC | 51  | GGACCCA  | 237 | 32 |
| AGTTCAG | 47  | GGAGAAC  | 118 | 32 |
| AGTTCAT | 108 | GGATCGA  | 118 | 32 |
| AGTTCCA | 47  | GGCAAAT  | 118 | 32 |
| AGTTCCC | 11  | GGCTCGT  | 118 | 32 |
| AGTTCCG | 14  | GGCTGGT  | 118 | 32 |
| AGTTCCT | 58  | GGCTGTC  | 355 | 32 |
| AGTTCGA | 29  | GGGGACA  | 118 | 32 |
| AGTTCGC | 36  | GGGGCTG  | 118 | 32 |
| AGTTCGG | 18  | GGGTAGC  | 118 | 32 |
| AGTTCGT | 22  | GTACACG  | 118 | 32 |
| AGTTCTA | 54  | GTAGTAA  | 118 | 32 |
| AGTTCTC | 83  | GTCAAGT  | 118 | 32 |
| AGTTCTG | 11  | GTCCAGT  | 118 | 32 |
| AGTTCTT | 65  | GTGGGCT  | 118 | 32 |
| AGTTGAA | 61  | GTTTAAAC | 118 | 32 |
| AGTTGAC | 61  | GTTTCGC  | 118 | 32 |
| AGTTGAG | 36  | TAACCCC  | 118 | 32 |
| AGTTGAT | 69  | TACGACG  | 118 | 32 |
| AGTTGCA | 61  | TACTCGT  | 118 | 32 |
| AGTTGCC | 47  | TAGGATG  | 118 | 32 |
| AGTTGCG | 40  | TAGTAAC  | 118 | 32 |
| AGTTGCT | 76  | TCAATAC  | 118 | 32 |
| AGTTGGA | 51  | TCCAGTT  | 237 | 32 |
| AGTTGGC | 61  | TCCTCGA  | 118 | 32 |
| AGTTGGG | 51  | TCGAAAC  | 118 | 32 |
| AGTTGGT | 69  | TGAGAAC  | 118 | 32 |
| AGTTGTA | 94  | TGGTTAC  | 118 | 32 |
| AGTTGTC | 32  | TGTCTGA  | 118 | 32 |
| AGTTGTG | 94  | TTCACGC  | 118 | 32 |
| AGTTGTT | 87  | TTCCGTC  | 118 | 32 |
| AGTTTAA | 112 | TTCCGTG  | 118 | 32 |
| AGTTTAC | 51  | TTCGCAA  | 118 | 32 |
| AGTTTAG | 97  | TTCGCCA  | 118 | 32 |
| AGTTTAT | 112 | AACCGCA  | 118 | 29 |
| AGTTTCA | 72  | AAGGTGC  | 118 | 29 |
| AGTTTCC | 58  | ACCACGT  | 118 | 29 |
| AGTTTCG | 25  | ACCGCAC  | 118 | 29 |
| AGTTTCT | 115 | ACCGCTC  | 118 | 29 |
| AGTTTGA | 112 | ACCTCGT  | 118 | 29 |

|         |     |          |     |    |
|---------|-----|----------|-----|----|
| AGTTTGC | 58  | ACGAGGT  | 237 | 29 |
| AGTTTGG | 51  | ACGCATC  | 118 | 29 |
| AGTTTGT | 119 | ACTCGTC  | 118 | 29 |
| AGTTTTA | 123 | ACTGACC  | 118 | 29 |
| AGTTTTC | 51  | ACTGAGG  | 118 | 29 |
| AGTTTTG | 94  | ACTGCGG  | 118 | 29 |
| AGTTTTT | 188 | AGACCGT  | 118 | 29 |
| ATAAAAA | 339 | AGCGACC  | 118 | 29 |
| ATAAAAC | 133 | AGCGGTG  | 237 | 29 |
| ATAAAAG | 137 | ATATACG  | 118 | 29 |
| ATAAAAT | 368 | ATCACGA  | 118 | 29 |
| ATAAACA | 137 | ATCCGAC  | 118 | 29 |
| ATAAACC | 61  | ATTTCCG  | 118 | 29 |
| ATAAACG | 25  | CAATACT  | 118 | 29 |
| ATAAACT | 126 | CAGCGCG  | 118 | 29 |
| ATAAAGA | 97  | CAGTACT  | 118 | 29 |
| ATAAAGC | 133 | CAGTTAA  | 118 | 29 |
| ATAAAGG | 51  | CAGTTCT  | 118 | 29 |
| ATAAAGT | 105 | CATCGTC  | 118 | 29 |
| ATAAATA | 390 | CCCCCCG  | 118 | 29 |
| ATAAATC | 97  | CGAACAC  | 118 | 29 |
| ATAAATG | 191 | CGATTGG  | 118 | 29 |
| ATAAATT | 242 | CGCACCA  | 118 | 29 |
| ATAACAA | 115 | CGCACCA  | 118 | 29 |
| ATAACAC | 76  | CGGGTTG  | 118 | 29 |
| ATAACAG | 40  | CGGTTGA  | 118 | 29 |
| ATAACAT | 108 | CGTAGCC  | 118 | 29 |
| ATAACCA | 72  | CGTAGTA  | 118 | 29 |
| ATAACCC | 36  | CGTCACG  | 118 | 29 |
| ATAACCG | 36  | CGTCGAA  | 118 | 29 |
| ATAACCT | 51  | CTACGTG  | 118 | 29 |
| ATAACGA | 58  | CTCAGCG  | 118 | 29 |
| ATAACGC | 18  | CTCAGGT  | 118 | 29 |
| ATAACGG | 11  | CTCCAGG  | 118 | 29 |
| ATAACGT | 11  | CTGTGCG  | 118 | 29 |
| ATAACTA | 79  | GACGCGC  | 118 | 29 |
| ATAACTC | 61  | GA CTGGA | 118 | 29 |
| ATAACTG | 51  | GAGGCGT  | 118 | 29 |
| ATAACTT | 65  | GCCACGA  | 118 | 29 |
| ATAAGAA | 101 | GCCATAA  | 118 | 29 |
| ATAAGAC | 43  | GCCCTCG  | 118 | 29 |
| ATAAGAG | 97  | GCCGATT  | 118 | 29 |
| ATAAGAT | 90  | GCCGGGG  | 118 | 29 |
| ATAAGCA | 69  | GCGCATC  | 118 | 29 |
| ATAAGCC | 40  | GCGGGCT  | 118 | 29 |
| ATAAGCG | 18  | GGCAATC  | 118 | 29 |
| ATAAGCT | 69  | GGCCGTC  | 118 | 29 |
| ATAAGGA | 76  | GGCGACA  | 118 | 29 |
| ATAAGGC | 36  | GGGTAAT  | 118 | 29 |
| ATAAGGG | 40  | GTAACGA  | 118 | 29 |
| ATAAGGT | 76  | GTCTGAT  | 118 | 29 |
| ATAAGTA | 94  | GTTAGAA  | 118 | 29 |

|         |     |          |     |    |
|---------|-----|----------|-----|----|
| ATAAGTC | 32  | TAGATCG  | 118 | 29 |
| ATAAGTG | 72  | TATCCCC  | 118 | 29 |
| ATAAGTT | 108 | TATGCAG  | 118 | 29 |
| ATAATAA | 249 | TCACGGG  | 118 | 29 |
| ATAATAC | 123 | TCAGCCT  | 118 | 29 |
| ATAATAG | 58  | TCAGCGG  | 118 | 29 |
| ATAATAT | 224 | TCATCGA  | 118 | 29 |
| ATAATCA | 94  | TCCTTAC  | 118 | 29 |
| ATAATCC | 32  | TCGGGGA  | 118 | 29 |
| ATAATCG | 40  | TCTACCA  | 118 | 29 |
| ATAATCT | 137 | TGACCAG  | 118 | 29 |
| ATAATGA | 61  | TGACCCA  | 118 | 29 |
| ATAATGC | 101 | TGAGGCT  | 118 | 29 |
| ATAATGG | 47  | TTCGAAG  | 118 | 29 |
| ATAATGT | 83  | TTCGTAA  | 118 | 29 |
| ATAATTA | 173 | TTGCGGG  | 118 | 29 |
| ATAATTC | 97  | AACTGAC  | 118 | 25 |
| ATAATTG | 115 | ACGCCCC  | 118 | 25 |
| ATAATTT | 209 | ACGGTAA  | 118 | 25 |
| ATACAAA | 133 | ACGTGTT  | 118 | 25 |
| ATACAAC | 65  | ACTGAAC  | 118 | 25 |
| ATACAAG | 79  | AGAACGG  | 118 | 25 |
| ATACAAT | 108 | AGAAGCG  | 118 | 25 |
| ATACACA | 51  | AGACCGA  | 118 | 25 |
| ATACACA | 51  | AGTGGGC  | 118 | 25 |
| ATACACC | 51  | ATAGGCT  | 118 | 25 |
| ATACACG | 32  | ATCGGGG  | 118 | 25 |
| ATACAGA | 58  | CAACGCC  | 118 | 25 |
| ATACAGC | 40  | CAACTGA  | 118 | 25 |
| ATACAGG | 29  | CAATGCG  | 118 | 25 |
| ATACAGT | 65  | CACTTAC  | 118 | 25 |
| ATACATA | 133 | CAGCGGG  | 118 | 25 |
| ATACATC | 61  | CAGTCGT  | 118 | 25 |
| ATACATG | 97  | CAGTGTA  | 118 | 25 |
| ATACATT | 90  | CATTAGC  | 118 | 25 |
| ATACCAA | 123 | CCCAGCT  | 118 | 25 |
| ATACCAC | 36  | CCCATCG  | 355 | 25 |
| ATACCAG | 32  | CCGACTC  | 118 | 25 |
| ATACCAT | 72  | CCGGCAC  | 118 | 25 |
| ATACCCA | 51  | CCGTGTA  | 118 | 25 |
| ATACCCC | 36  | CCTGAGT  | 118 | 25 |
| ATACCCG | 29  | CGAAGAC  | 118 | 25 |
| ATACCCT | 32  | CGACCAC  | 237 | 25 |
| ATACCGA | 22  | CGATTCG  | 118 | 25 |
| ATACCGC | 18  | CGCTACG  | 118 | 25 |
| ATACCGG | 29  | CGTACAA  | 118 | 25 |
| ATACCGT | 18  | CGTG TTC | 118 | 25 |
| ATACCTA | 61  | CGTTAGC  | 118 | 25 |
| ATACCTC | 54  | CGTTAGT  | 118 | 25 |
| ATACCTG | 32  | CTCAGAT  | 118 | 25 |
| ATACCTT | 65  | CTCGTAC  | 118 | 25 |
| ATACGAA | 43  | CTGCGGA  | 237 | 25 |

|         |     |          |     |    |
|---------|-----|----------|-----|----|
| ATACGAC | 25  | GATCCCG  | 118 | 25 |
| ATACGAG | 22  | GATCCGG  | 118 | 25 |
| ATACGAT | 29  | GATCGCC  | 118 | 25 |
| ATACGCA | 18  | GATTCGC  | 118 | 25 |
| ATACGCC | 47  | GCATCCG  | 118 | 25 |
| ATACGCG | 18  | GCCTCGA  | 118 | 25 |
| ATACGCT | 25  | GCTGCGG  | 118 | 25 |
| ATACGGA | 29  | GGATTCT  | 118 | 25 |
| ATACGGC | 7   | GGGTCGC  | 118 | 25 |
| ATACGGG | 7   | GGTACT   | 118 | 25 |
| ATACGGT | 22  | GTA CTGG | 118 | 25 |
| ATACGTA | 47  | GTCGAAA  | 118 | 25 |
| ATACGTC | 11  | GTTGGGT  | 118 | 25 |
| ATACGTG | 32  | TAAGACG  | 118 | 25 |
| ATACGTT | 18  | TAAGCAG  | 118 | 25 |
| ATACTAA | 94  | TCCGCTA  | 118 | 25 |
| ATACTAC | 54  | TCCGTGG  | 118 | 25 |
| ATACTAG | 54  | TCGACCC  | 118 | 25 |
| ATACTAT | 108 | TGGGTAG  | 118 | 25 |
| ATACTCA | 83  | TTACAGC  | 118 | 25 |
| ATACTCC | 72  | TTCCCGC  | 118 | 25 |
| ATACTCG | 29  | TTTACAG  | 118 | 25 |
| ATACTCT | 36  | TTTCGTA  | 118 | 25 |
| ATACTGA | 58  | TTTCGTA  | 118 | 25 |
| ATACTGC | 22  | AAACCGC  | 118 | 22 |
| ATACTGG | 25  | ACATGCG  | 118 | 22 |
| ATACTGT | 36  | AGAGCGT  | 118 | 22 |
| ATACTTA | 69  | ATCGTCG  | 118 | 22 |
| ATACTTC | 29  | ATGACAG  | 118 | 22 |
| ATACTTG | 87  | ATTATCC  | 118 | 22 |
| ATACTTT | 72  | ATTCGCC  | 118 | 22 |
| ATAGAAA | 170 | CACGAAG  | 118 | 22 |
| ATAGAAC | 36  | CACGGTA  | 118 | 22 |
| ATAGAAG | 76  | CATTGTG  | 118 | 22 |
| ATAGAAT | 105 | CCCGGGC  | 118 | 22 |
| ATAGACA | 51  | CCGATTC  | 118 | 22 |
| ATAGACC | 43  | CCGCAGA  | 118 | 22 |
| ATAGACG | 43  | CCGGGAT  | 118 | 22 |
| ATAGACT | 51  | CCTCGTA  | 118 | 22 |
| ATAGAGA | 123 | CGCAGAT  | 118 | 22 |
| ATAGAGC | 47  | CGTCGTT  | 118 | 22 |
| ATAGAGG | 51  | CTGAGTG  | 118 | 22 |
| ATAGAGT | 115 | CTTCCCG  | 118 | 22 |
| ATAGATA | 130 | GACCGTA  | 118 | 22 |
| ATAGATC | 54  | GATTCTG  | 118 | 22 |
| ATAGATG | 76  | GCCCGAT  | 118 | 22 |
| ATAGATT | 97  | GCGACCA  | 237 | 22 |
| ATAGCAA | 83  | GCGGTGT  | 118 | 22 |
| ATAGCAC | 43  | GCGTAGC  | 118 | 22 |
| ATAGCAG | 32  | GCGTTAG  | 118 | 22 |
| ATAGCAT | 76  | GCTGTAC  | 118 | 22 |
| ATAGCCA | 69  | GGTCAAG  | 118 | 22 |

|         |     |          |     |    |
|---------|-----|----------|-----|----|
| ATAGCCA | 69  | GTA ACTG | 118 | 22 |
| ATAGCCG | 22  | GTCACGA  | 118 | 22 |
| ATAGCCT | 61  | GTTCCGG  | 118 | 22 |
| ATAGCGA | 18  | TAGAACG  | 118 | 22 |
| ATAGCGC | 4   | TATAACG  | 118 | 22 |
| ATAGCGG | 25  | TCAACGC  | 118 | 22 |
| ATAGCGT | 40  | TCCGACG  | 118 | 22 |
| ATAGCTA | 94  | TCGCGCA  | 118 | 22 |
| ATAGCTC | 69  | TGAGGGT  | 118 | 22 |
| ATAGCTG | 40  | TGGTCCC  | 118 | 22 |
| ATAGCTT | 65  | TTTGCGC  | 118 | 22 |
| ATAGGAA | 69  | AACGCCG  | 118 | 18 |
| ATAGGAC | 29  | AATGGCG  | 118 | 18 |
| ATAGGAG | 51  | ACCCGGG  | 118 | 18 |
| ATAGGAT | 29  | ACGAATC  | 118 | 18 |
| ATAGGCA | 22  | ACGCGCA  | 118 | 18 |
| ATAGGCC | 43  | ACGGGCG  | 118 | 18 |
| ATAGGCG | 11  | AGATCGC  | 118 | 18 |
| ATAGGCT | 25  | AGGGGCT  | 118 | 18 |
| ATAGGGA | 7   | ATCCGGG  | 118 | 18 |
| ATAGGGC | 36  | ATGCGCA  | 118 | 18 |
| ATAGGGG | 43  | CACCGGG  | 118 | 18 |
| ATAGGGT | 43  | CAGAGCG  | 237 | 18 |
| ATAGGTA | 32  | CCAGTTA  | 118 | 18 |
| ATAGGTC | 25  | CCCAGTT  | 118 | 18 |
| ATAGGTG | 58  | CCCGATG  | 118 | 18 |
| ATAGGTT | 72  | CCCGGCA  | 118 | 18 |
| ATAGTAA | 119 | CCCGGCA  | 118 | 18 |
| ATAGTAC | 32  | CCGCAAT  | 118 | 18 |
| ATAGTAG | 47  | CGAATCT  | 118 | 18 |
| ATAGTAT | 83  | CGCCGGG  | 118 | 18 |
| ATAGTCA | 72  | CGGGATC  | 118 | 18 |
| ATAGTCC | 32  | CTCCGAG  | 118 | 18 |
| ATAGTCG | 11  | CTGCGGT  | 118 | 18 |
| ATAGTCT | 47  | GAACGCC  | 118 | 18 |
| ATAGTGA | 69  | GACCCAG  | 118 | 18 |
| ATAGTGC | 47  | GAGCGTA  | 118 | 18 |
| ATAGTGG | 47  | GATTCCG  | 118 | 18 |
| ATAGTGT | 79  | GCTAGGT  | 118 | 18 |
| ATAGTTA | 119 | GGGGGCT  | 118 | 18 |
| ATAGTTC | 76  | TCTGAGT  | 118 | 18 |
| ATAGTTG | 69  | AACGCCT  | 118 | 14 |
| ATAGTTT | 101 | CATCCGA  | 118 | 14 |
| ATATAAA | 274 | TCACGAC  | 118 | 14 |
| ATATAAC | 51  | TCCTAGT  | 118 | 14 |
| ATATAAG | 159 | TCGTAAC  | 118 | 14 |
| ATATAAT | 314 | TGCGGAC  | 118 | 14 |
| ATATACA | 166 | ACTTACG  | 118 | 11 |
| ATATACC | 54  | AGTTCTG  | 118 | 11 |
| ATATACG | 29  | ATCTCAG  | 118 | 11 |
| ATATACT | 108 | CGTAACT  | 118 | 11 |
| ATATAGA | 159 | GCGCTTA  | 118 | 11 |

|          |     |         |     |   |
|----------|-----|---------|-----|---|
| ATATAGC  | 108 | AGCGTAC | 118 | 7 |
| ATATAGG  | 87  | AGCGTAG | 118 | 7 |
| ATATAGT  | 69  | ATTCCGT | 118 | 7 |
| ATATATA  | 620 | CGCTAAT | 118 | 7 |
| ATATATC  | 170 | CGTTATA | 118 | 7 |
| ATATATT  | 307 | CCAGTTC | 118 | 4 |
| ATATCAA  | 115 | GCCGACT | 118 | 4 |
| ATATCAC  | 51  |         |     |   |
| ATATCAG  | 43  |         |     |   |
| ATATCAT  | 126 |         |     |   |
| ATATCCA  | 61  |         |     |   |
| ATATCCC  | 47  |         |     |   |
| ATATCCG  | 29  |         |     |   |
| ATATCCT  | 51  |         |     |   |
| ATATCGA  | 54  |         |     |   |
| ATATCGC  | 14  |         |     |   |
| ATATCGG  | 47  |         |     |   |
| ATATCGT  | 51  |         |     |   |
| ATATCTA  | 97  |         |     |   |
| ATATCTC  | 76  |         |     |   |
| ATATCTG  | 76  |         |     |   |
| ATATCTT  | 155 |         |     |   |
| ATATGAA  | 126 |         |     |   |
| ATATGAC  | 61  |         |     |   |
| ATATGAG  | 141 |         |     |   |
| ATATGAT  | 152 |         |     |   |
| ATATGCA  | 87  |         |     |   |
| ATATGCC  | 83  |         |     |   |
| ATATGCG  | 40  |         |     |   |
| ATATGCT  | 90  |         |     |   |
| ATATGGA  | 123 |         |     |   |
| ATATGGC  | 72  |         |     |   |
| ATATGGG  | 36  |         |     |   |
| ATATGGT  | 97  |         |     |   |
| ATATGTA  | 148 |         |     |   |
| ATATGTC  | 87  |         |     |   |
| ATATGTG  | 97  |         |     |   |
| ATATGTT  | 177 |         |     |   |
| ATATTAA  | 180 |         |     |   |
| ATATTAC  | 83  |         |     |   |
| ATATTAG  | 83  |         |     |   |
| ATATTAT  | 184 |         |     |   |
| ATATTCA  | 83  |         |     |   |
| ATATTCC  | 47  |         |     |   |
| ATATTCCG | 47  |         |     |   |
| ATATTCT  | 101 |         |     |   |
| ATATTGA  | 83  |         |     |   |
| ATATTGC  | 58  |         |     |   |
| ATATTGG  | 51  |         |     |   |
| ATATTGT  | 115 |         |     |   |
| ATATTTA  | 274 |         |     |   |
| ATATTTTC | 133 |         |     |   |



|         |     |
|---------|-----|
| ATATTTG | 170 |
| ATATTTT | 408 |
| ATCAAAA | 108 |
| ATCAAAC | 94  |
| ATCAAAG | 79  |
| ATCAAAT | 126 |
| ATCAACA | 90  |
| ATCAACC | 54  |
| ATCAACG | 54  |
| ATCAACT | 87  |
| ATCAAGA | 90  |
| ATCAAGC | 72  |
| ATCAAGG | 58  |
| ATCAAGT | 69  |
| ATCAATA | 79  |
| ATCAATC | 61  |
| ATCAATG | 76  |
| ATCAATT | 94  |
| ATCACAA | 97  |
| ATCACAC | 51  |
| ATCACAG | 14  |
| ATCACAT | 90  |
| ATCACCA | 108 |
| ATCACCC | 29  |
| ATCACCG | 72  |
| ATCACCT | 69  |
| ATCACGA | 29  |
| ATCACGC | 43  |
| ATCACGG | 29  |
| ATCACGT | 29  |
| ATCACTA | 94  |
| ATCACTC | 87  |
| ATCACTG | 58  |
| ATCACTT | 119 |
| ATCAGAA | 61  |
| ATCAGAC | 69  |
| ATCAGAG | 32  |
| ATCAGAT | 54  |
| ATCAGCA | 61  |
| ATCAGCC | 25  |
| ATCAGCG | 32  |
| ATCAGCT | 76  |
| ATCAGGA | 36  |
| ATCAGGC | 18  |
| ATCAGGG | 58  |
| ATCAGGT | 54  |
| ATCAGTA | 51  |
| ATCAGTC | 32  |
| ATCAGTG | 36  |
| ATCAGTT | 72  |
| ATCATAA | 112 |
| ATCATAC | 51  |

|          |     |
|----------|-----|
| ATCATAG  | 47  |
| ATCATAT  | 180 |
| ATCATCA  | 97  |
| ATCATCC  | 61  |
| ATCATCG  | 43  |
| ATCATCT  | 83  |
| ATCATGA  | 97  |
| ATCATGC  | 79  |
| ATCATGG  | 40  |
| ATCATGT  | 123 |
| ATCATT A | 83  |
| ATCATTC  | 115 |
| ATCATTG  | 54  |
| ATCATTT  | 141 |
| ATCCAAA  | 141 |
| ATCCAAC  | 76  |
| ATCCAAG  | 29  |
| ATCCAAT  | 87  |
| ATCCACA  | 97  |
| ATCCACC  | 61  |
| ATCCACG  | 40  |
| ATCCACT  | 90  |
| ATCCAGA  | 97  |
| ATCCAGC  | 87  |
| ATCCAGG  | 29  |
| ATCCAGT  | 51  |
| ATCCATA  | 105 |
| ATCCATC  | 159 |
| ATCCATG  | 79  |
| ATCCATT  | 115 |
| ATCCCAA  | 76  |
| ATCCCAC  | 47  |
| ATCCCAG  | 22  |
| ATCCCAT  | 54  |
| ATCCCCA  | 69  |
| ATCCCCC  | 40  |
| ATCCCCG  | 29  |
| ATCCCCT  | 58  |
| ATCCCGA  | 25  |
| ATCCCGC  | 32  |
| ATCCCGG  | 14  |
| ATCCCGT  | 36  |
| ATCCCTA  | 90  |
| ATCCCTC  | 54  |
| ATCCCTG  | 54  |
| ATCCCTT  | 101 |
| ATCCGAA  | 36  |
| ATCCGAC  | 29  |
| ATCCGAG  | 36  |
| ATCCGAT  | 43  |
| ATCCGCA  | 32  |
| ATCCGCC  | 47  |

|         |     |
|---------|-----|
| ATCCGCG | 40  |
| ATCCGCT | 22  |
| ATCCGGA | 22  |
| ATCCGGC | 40  |
| ATCCGGG | 18  |
| ATCCGGT | 54  |
| ATCCGTA | 54  |
| ATCCGTC | 47  |
| ATCCGTG | 29  |
| ATCCGTT | 47  |
| ATCCTAA | 65  |
| ATCCTAC | 54  |
| ATCCTAG | 65  |
| ATCCTAT | 108 |
| ATCCTCA | 72  |
| ATCCTCC | 76  |
| ATCCTCG | 51  |
| ATCCTCT | 87  |
| ATCCTGA | 58  |
| ATCCTGA | 58  |
| ATCCTGC | 40  |
| ATCCTGG | 40  |
| ATCCTTA | 54  |
| ATCCTTC | 61  |
| ATCCTTG | 51  |
| ATCCTTT | 79  |
| ATCGAAA | 32  |
| ATCGAAC | 47  |
| ATCGAAG | 32  |
| ATCGAAT | 47  |
| ATCGACA | 29  |
| ATCGACC | 47  |
| ATCGACG | 36  |
| ATCGACT | 18  |
| ATCGAGA | 54  |
| ATCGAGC | 65  |
| ATCGAGG | 25  |
| ATCGAGT | 47  |
| ATCGATA | 36  |
| ATCGATC | 83  |
| ATCGATG | 51  |
| ATCGATT | 72  |
| ATCGCAA | 36  |
| ATCGCAC | 18  |
| ATCGCAG | 18  |
| ATCGCAT | 43  |
| ATCGCCA | 47  |
| ATCGCCC | 29  |
| ATCGCCG | 51  |
| ATCGCCT | 25  |
| ATCGCGA | 11  |
| ATCGCGC | 25  |

|         |     |
|---------|-----|
| ATCGCGG | 22  |
| ATCGCGT | 14  |
| ATCGCTA | 25  |
| ATCGCTC | 32  |
| ATCGCTG | 22  |
| ATCGCTT | 32  |
| ATCGGAA | 32  |
| ATCGGAC | 32  |
| ATCGGAG | 32  |
| ATCGGAT | 40  |
| ATCGGCA | 51  |
| ATCGGCC | 47  |
| ATCGGCG | 14  |
| ATCGGCT | 65  |
| ATCGGGA | 40  |
| ATCGGGA | 40  |
| ATCGGGG | 25  |
| ATCGGGT | 22  |
| ATCGGTA | 29  |
| ATCGGTC | 40  |
| ATCGGTG | 32  |
| ATCGGTT | 40  |
| ATCGTAA | 14  |
| ATCGTAC | 36  |
| ATCGTAG | 25  |
| ATCGTAT | 29  |
| ATCGTCA | 7   |
| ATCGTCC | 14  |
| ATCGTCG | 22  |
| ATCGTCT | 29  |
| ATCGTGA | 22  |
| ATCGTGC | 25  |
| ATCGTGG | 40  |
| ATCGTGT | 76  |
| ATCGTTA | 18  |
| ATCGTTC | 72  |
| ATCGTTG | 32  |
| ATCGTTT | 51  |
| ATCTAAA | 94  |
| ATCTAAC | 79  |
| ATCTAAG | 58  |
| ATCTAAT | 115 |
| ATCTACA | 83  |
| ATCTACC | 61  |
| ATCTACG | 43  |
| ATCTACT | 40  |
| ATCTAGA | 108 |
| ATCTAGC | 40  |
| ATCTAGG | 76  |
| ATCTAGT | 79  |
| ATCTATA | 119 |
| ATCTATC | 72  |

|         |     |
|---------|-----|
| ATCTATG | 61  |
| ATCTATT | 126 |
| ATCTCAA | 79  |
| ATCTCAC | 40  |
| ATCTCAG | 11  |
| ATCTCAT | 177 |
| ATCTCCA | 130 |
| ATCTCCC | 90  |
| ATCTCCG | 22  |
| ATCTCCT | 43  |
| ATCTCGA | 61  |
| ATCTCGC | 51  |
| ATCTCGG | 22  |
| ATCTCGT | 51  |
| ATCTCTA | 90  |
| ATCTCTC | 115 |
| ATCTCTG | 61  |
| ATCTCTT | 133 |
| ATCTGAA | 69  |
| ATCTGAA | 69  |
| ATCTGAC | 83  |
| ATCTGAT | 108 |
| ATCTGCA | 47  |
| ATCTGCC | 43  |
| ATCTGCG | 36  |
| ATCTGCT | 43  |
| ATCTGGA | 43  |
| ATCTGGC | 51  |
| ATCTGGG | 25  |
| ATCTGGT | 32  |
| ATCTGTA | 61  |
| ATCTGTC | 54  |
| ATCTGTG | 54  |
| ATCTGTT | 119 |
| ATCTTAA | 83  |
| ATCTTAC | 40  |
| ATCTTAG | 61  |
| ATCTTAT | 115 |
| ATCTTCA | 105 |
| ATCTTCC | 94  |
| ATCTTCG | 51  |
| ATCTTCT | 130 |
| ATCTTGA | 90  |
| ATCTTGC | 76  |
| ATCTTGG | 119 |
| ATCTTGT | 112 |
| ATCTTTA | 133 |
| ATCTTTC | 119 |
| ATCTTTG | 97  |
| ATCTTTT | 173 |
| ATGAAAA | 173 |
| ATGAAAC | 76  |

|         |     |
|---------|-----|
| ATGAAAG | 76  |
| ATGAAAT | 112 |
| ATGAACA | 112 |
| ATGAACC | 79  |
| ATGAACG | 47  |
| ATGAACT | 90  |
| ATGAAGA | 137 |
| ATGAAGC | 40  |
| ATGAAGG | 58  |
| ATGAAGT | 83  |
| ATGAATA | 76  |
| ATGAATC | 72  |
| ATGAATG | 76  |
| ATGAATT | 101 |
| ATGACAA | 101 |
| ATGACAC | 72  |
| ATGACAG | 22  |
| ATGACAT | 105 |
| ATGACCA | 43  |
| ATGACCC | 22  |
| ATGACCG | 40  |
| ATGACCT | 69  |
| ATGACGA | 47  |
| ATGACGC | 25  |
| ATGACGG | 11  |
| ATGACGT | 51  |
| ATGACTA | 76  |
| ATGACTA | 76  |
| ATGACTG | 47  |
| ATGACTT | 123 |
| ATGAGAA | 87  |
| ATGAGAC | 54  |
| ATGAGAG | 79  |
| ATGAGAT | 69  |
| ATGAGCA | 72  |
| ATGAGCC | 65  |
| ATGAGCG | 22  |
| ATGAGCT | 97  |
| ATGAGGA | 43  |
| ATGAGGC | 29  |
| ATGAGGG | 51  |
| ATGAGGT | 32  |
| ATGAGTA | 87  |
| ATGAGTC | 25  |
| ATGAGTG | 65  |
| ATGAGTT | 87  |
| ATGATAA | 115 |
| ATGATAC | 72  |
| ATGATAG | 83  |
| ATGATAT | 144 |
| ATGATCA | 108 |
| ATGATCC | 47  |

|         |     |
|---------|-----|
| ATGATCG | 22  |
| ATGATCT | 90  |
| ATGATGA | 152 |
| ATGATGC | 69  |
| ATGATGG | 69  |
| ATGATGT | 123 |
| ATGATTA | 105 |
| ATGATTC | 83  |
| ATGATTG | 65  |
| ATGATTT | 148 |
| ATGCAAA | 130 |
| ATGCAAC | 90  |
| ATGCAAG | 65  |
| ATGCAAT | 79  |
| ATGCACA | 130 |
| ATGCACC | 69  |
| ATGCACG | 58  |
| ATGCACT | 112 |
| ATGCAGA | 58  |
| ATGCAGC | 72  |
| ATGCAGG | 25  |
| ATGCAGT | 47  |
| ATGCATA | 130 |
| ATGCATC | 76  |
| ATGCATG | 274 |
| ATGCATT | 72  |
| ATGCCAA | 90  |
| ATGCCAC | 51  |
| ATGCCAG | 25  |
| ATGCCAT | 47  |
| ATGCCCA | 69  |
| ATGCCCC | 43  |
| ATGCCCG | 18  |
| ATGCCCT | 58  |
| ATGCCGA | 58  |
| ATGCCGC | 40  |
| ATGCCGG | 54  |
| ATGCCGT | 43  |
| ATGCCTA | 87  |
| ATGCCTC | 69  |
| ATGCCTG | 40  |
| ATGCCTT | 87  |
| ATGCGAA | 36  |
| ATGCGAC | 43  |
| ATGCGAG | 32  |
| ATGCGAT | 29  |
| ATGCGCA | 18  |
| ATGCGCC | 11  |
| ATGCGCG | 43  |
| ATGCGCT | 43  |
| ATGCGGA | 32  |
| ATGCGGC | 36  |

|         |     |
|---------|-----|
| ATGCGGG | 14  |
| ATGCGGT | 22  |
| ATGCGTA | 40  |
| ATGCGTC | 43  |
| ATGCGTG | 69  |
| ATGCGTT | 36  |
| ATGCTAA | 43  |
| ATGCTAC | 69  |
| ATGCTAG | 40  |
| ATGCTAT | 69  |
| ATGCTCA | 101 |
| ATGCTCC | 54  |
| ATGCTCG | 40  |
| ATGCTCT | 58  |
| ATGCTGA | 69  |
| ATGCTGC | 54  |
| ATGCTGG | 54  |
| ATGCTGT | 36  |
| ATGCTTA | 65  |
| ATGCTTC | 79  |
| ATGCTTG | 101 |
| ATGCTTT | 152 |
| ATGAAA  | 105 |
| ATGGAAC | 47  |
| ATGGAAG | 69  |
| ATGGAAT | 69  |
| ATGGACA | 65  |
| ATGGACC | 79  |
| ATGGACG | 36  |
| ATGGACT | 58  |
| ATGGAGA | 87  |
| ATGGAGC | 61  |
| ATGGAGG | 126 |
| ATGGAGT | 58  |
| ATGGATA | 54  |
| ATGGATC | 72  |
| ATGGATG | 112 |
| ATGGATT | 112 |
| ATGGCAA | 69  |
| ATGGCAC | 72  |
| ATGGCAG | 29  |
| ATGGCAT | 87  |
| ATGGCCA | 69  |
| ATGGCCC | 43  |
| ATGGCCG | 32  |
| ATGGCCT | 32  |
| ATGGCGA | 40  |
| ATGGCGC | 22  |
| ATGGCGG | 40  |
| ATGGCGT | 40  |
| ATGGCTA | 51  |
| ATGGCTC | 58  |



|         |     |
|---------|-----|
| ATGGCTG | 40  |
| ATGGCTT | 36  |
| ATGGGAA | 79  |
| ATGGGAC | 61  |
| ATGGGAG | 54  |
| ATGGGAT | 65  |
| ATGGGCA | 40  |
| ATGGGCC | 40  |
| ATGGGCG | 36  |
| ATGGGCT | 65  |
| ATGGGGA | 36  |
| ATGGGGA | 36  |
| ATGGGGC | 43  |
| ATGGGGT | 47  |
| ATGGGTA | 47  |
| ATGGGTC | 36  |
| ATGGGTG | 54  |
| ATGGGTT | 54  |
| ATGGTAA | 65  |
| ATGGTAC | 40  |
| ATGGTAG | 36  |
| ATGGTAT | 69  |
| ATGGTCA | 47  |
| ATGGTCC | 54  |
| ATGGTCG | 65  |
| ATGGTCT | 58  |
| ATGGTGA | 69  |
| ATGGTGC | 79  |
| ATGGTGG | 47  |
| ATGGTGT | 83  |
| ATGGTTA | 72  |
| ATGGTTC | 40  |
| ATGGTTG | 97  |
| ATGGTTT | 126 |
| ATGTAAG | 133 |
| ATGTAAC | 79  |
| ATGTAAG | 54  |
| ATGTAAT | 123 |
| ATGTACA | 87  |
| ATGTACC | 32  |
| ATGTACG | 36  |
| ATGTACT | 83  |
| ATGTAGA | 69  |
| ATGTAGC | 54  |
| ATGTAGG | 43  |
| ATGTAGT | 61  |
| ATGTATA | 173 |
| ATGTATC | 69  |
| ATGTATG | 108 |
| ATGTATT | 159 |
| ATGTCAA | 58  |
| ATGTCAC | 47  |

|         |     |
|---------|-----|
| ATGTCAG | 47  |
| ATGTCAT | 90  |
| ATGTCCA | 51  |
| ATGTCCC | 22  |
| ATGTCCG | 25  |
| ATGTCCT | 76  |
| ATGTCGA | 40  |
| ATGTCGC | 25  |
| ATGTCGG | 22  |
| ATGTCGT | 69  |
| ATGTCTA | 79  |
| ATGTCTC | 76  |
| ATGTCTG | 61  |
| ATGTCTT | 123 |
| ATGTGAA | 112 |
| ATGTGAA | 112 |
| ATGTGAC | 47  |
| ATGTGAG | 72  |
| ATGTGCA | 83  |
| ATGTGCC | 69  |
| ATGTGCG | 51  |
| ATGTGCT | 72  |
| ATGTGGA | 54  |
| ATGTGGC | 40  |
| ATGTGGG | 36  |
| ATGTGGT | 126 |
| ATGTGTA | 105 |
| ATGTGTC | 94  |
| ATGTGTG | 97  |
| ATGTGTT | 105 |
| ATGTTAA | 94  |
| ATGTTAC | 61  |
| ATGTTAG | 76  |
| ATGTTAT | 119 |
| ATGTTCA | 97  |
| ATGTTCC | 61  |
| ATGTTCG | 29  |
| ATGTTCT | 97  |
| ATGTTGA | 115 |
| ATGTTGC | 94  |
| ATGTTGG | 79  |
| ATGTTGT | 152 |
| ATGTTTA | 105 |
| ATGTTTC | 112 |
| ATGTTTG | 94  |
| ATGTTTT | 180 |
| ATTAAAA | 198 |
| ATTAAAC | 141 |
| ATTAAAG | 79  |
| ATTAAAT | 195 |
| ATTAACA | 90  |
| ATTAACC | 29  |

|         |     |
|---------|-----|
| ATTAACG | 32  |
| ATTAACT | 43  |
| ATTAAGA | 72  |
| ATTAAGC | 47  |
| ATTAAGG | 58  |
| ATTAAGT | 61  |
| ATTAATA | 130 |
| ATTAATC | 97  |
| ATTAATG | 83  |
| ATTAATT | 231 |
| ATTACAA | 126 |
| ATTACAC | 69  |
| ATTACAG | 43  |
| ATTACAT | 90  |
| ATTACCA | 54  |
| ATTACCC | 25  |
| ATTACCG | 25  |
| ATTACCT | 51  |
| ATTACGA | 18  |
| ATTACGC | 18  |
| ATTACGG | 22  |
| ATTACGT | 22  |
| ATTACTA | 119 |
| ATTACTC | 83  |
| ATTACTG | 29  |
| ATTACTT | 61  |
| ATTAGAA | 69  |
| ATTAGAC | 47  |
| ATTAGAG | 87  |
| ATTAGAT | 90  |
| ATTAGCA | 32  |
| ATTAGCC | 65  |
| ATTAGCG | 11  |
| ATTAGCT | 83  |
| ATTAGGA | 51  |
| ATTAGGC | 32  |
| ATTAGGG | 58  |
| ATTAGGT | 69  |
| ATTAGTA | 51  |
| ATTAGTC | 69  |
| ATTAGTG | 58  |
| ATTAGTT | 58  |
| ATTATAA | 191 |
| ATTATAC | 87  |
| ATTATAG | 123 |
| ATTATAT | 253 |
| ATTATCA | 105 |
| ATTATCC | 22  |
| ATTATCG | 11  |
| ATTATCT | 108 |
| ATTATGA | 97  |
| ATTATGC | 87  |

|         |     |
|---------|-----|
| ATTATGG | 76  |
| ATTATGT | 112 |
| ATTATTA | 231 |
| ATTATTC | 101 |
| ATTATTG | 130 |
| ATTATTT | 245 |
| ATTCAAA | 155 |
| ATTCAAC | 87  |
| ATTCAAG | 72  |
| ATTCAAT | 101 |
| ATTCACA | 61  |
| ATTCACC | 87  |
| ATTCACG | 22  |
| ATTCACT | 90  |
| ATTCAGA | 76  |
| ATTCAGC | 43  |
| ATTCAGG | 47  |
| ATTCAGT | 43  |
| ATTCATA | 137 |
| ATTCATC | 144 |
| ATTCATG | 90  |
| ATTCATT | 137 |
| ATTCCAA | 90  |
| ATTCCAC | 47  |
| ATTCCAG | 72  |
| ATTCCAT | 87  |
| ATTCCCA | 47  |
| ATTCCCC | 58  |
| ATTCCCG | 14  |
| ATTCCCT | 76  |
| ATTCCGA | 25  |
| ATTCCGC | 14  |
| ATTCCGG | 43  |
| ATTCCGT | 7   |
| ATTCCTA | 51  |
| ATTCCTC | 101 |
| ATTCCTG | 54  |
| ATTCCTT | 115 |
| ATTCGAA | 54  |
| ATTCGAC | 47  |
| ATTCGAG | 47  |
| ATTCGAT | 51  |
| ATTCGCA | 14  |
| ATTCGCC | 22  |
| ATTCGCG | 11  |
| ATTCGCT | 32  |
| ATTCGGA | 40  |
| ATTCGGC | 14  |
| ATTCGGG | 11  |
| ATTCGGT | 32  |
| ATTCGTA | 36  |
| ATTCGTC | 32  |

|         |     |
|---------|-----|
| ATTCGTG | 25  |
| ATTCGTT | 65  |
| ATTCTAA | 94  |
| ATTCTAC | 43  |
| ATTCTAG | 51  |
| ATTCTAT | 105 |
| ATTCTCA | 72  |
| ATTCTCC | 94  |
| ATTCTCG | 36  |
| ATTCTCT | 108 |
| ATTCTGA | 47  |
| ATTCTGC | 32  |
| ATTCTGG | 32  |
| ATTCTGT | 54  |
| ATTCTTA | 90  |
| ATTCTTC | 123 |
| ATTCTTG | 108 |
| ATTCTTT | 141 |
| ATTGAAA | 130 |
| ATTGAAC | 40  |
| ATTGAAG | 43  |
| ATTGAAT | 112 |
| ATTGACA | 87  |
| ATTGACC | 36  |
| ATTGACG | 22  |
| ATTGACT | 72  |
| ATTGAGA | 51  |
| ATTGAGC | 65  |
| ATTGAGG | 76  |
| ATTGAGT | 69  |
| ATTGATA | 76  |
| ATTGATC | 97  |
| ATTGATG | 69  |
| ATTGATT | 94  |
| ATTGCAA | 115 |
| ATTGCAC | 61  |
| ATTGCAG | 43  |
| ATTGCAT | 94  |
| ATTGCCA | 79  |
| ATTGCCA | 79  |
| ATTGCCC | 25  |
| ATTGCCT | 43  |
| ATTGCGA | 18  |
| ATTGCGC | 40  |
| ATTGCGG | 11  |
| ATTGCGT | 4   |
| ATTGCTA | 69  |
| ATTGCTC | 54  |
| ATTGCTG | 29  |
| ATTGCTT | 83  |
| ATTGGAA | 83  |
| ATTGGAC | 83  |

|          |     |
|----------|-----|
| ATTGGAG  | 105 |
| ATTGGAT  | 51  |
| ATTGGCA  | 36  |
| ATTGGCC  | 40  |
| ATTGGCG  | 43  |
| ATTGGCT  | 43  |
| ATTGGGA  | 29  |
| ATTGGGC  | 22  |
| ATTGGGG  | 22  |
| ATTGGGT  | 51  |
| ATTGGTA  | 72  |
| ATTGGTC  | 40  |
| ATTGGTG  | 65  |
| ATTGGTT  | 101 |
| ATTGTAA  | 65  |
| ATTGTAC  | 22  |
| ATTGTAG  | 72  |
| ATTGTAT  | 76  |
| ATTGTCA  | 115 |
| ATTGTCC  | 29  |
| ATTGTCCG | 22  |
| ATTGTCT  | 112 |
| ATTGTGA  | 72  |
| ATTGTGC  | 43  |
| ATTGTGG  | 51  |
| ATTGTGT  | 90  |
| ATTGTTA  | 65  |
| ATTGTTC  | 61  |
| ATTGTTG  | 115 |
| ATTGTTT  | 213 |
| ATTTAAA  | 289 |
| ATTTAAC  | 65  |
| ATTTAAG  | 108 |
| ATTTAAT  | 220 |
| ATTTACA  | 87  |
| ATTTACC  | 58  |
| ATTTACG  | 25  |
| ATTTACT  | 94  |
| ATTTAGA  | 119 |
| ATTTAGC  | 83  |
| ATTTAGG  | 119 |
| ATTTAGT  | 141 |
| ATTTATA  | 285 |
| ATTTATA  | 285 |
| ATTTATC  | 141 |
| ATTTATG  | 144 |
| ATTTCAA  | 144 |
| ATTTCAC  | 79  |
| ATTTCAG  | 54  |
| ATTTCAT  | 126 |
| ATTTCCA  | 58  |
| ATTTCCC  | 83  |

|         |     |
|---------|-----|
| ATTTCCG | 29  |
| ATTTCCT | 76  |
| ATTTCGA | 69  |
| ATTTCGC | 22  |
| ATTTCGG | 25  |
| ATTTCGT | 72  |
| ATTTCTA | 152 |
| ATTTCTC | 133 |
| ATTTCTG | 87  |
| ATTTCTT | 148 |
| ATTTGAA | 184 |
| ATTTGAC | 87  |
| ATTTGAG | 115 |
| ATTTGAT | 216 |
| ATTTGCA | 123 |
| ATTTGCC | 54  |
| ATTTGCG | 40  |
| ATTTGCT | 130 |
| ATTTGGA | 119 |
| ATTTGGC | 97  |
| ATTTGGG | 51  |
| ATTTGGT | 141 |
| ATTTGTA | 141 |
| ATTTGTC | 119 |
| ATTTGTG | 101 |
| ATTTGTT | 166 |
| ATTTTAA | 220 |
| ATTTTAC | 112 |
| ATTTTAG | 130 |
| ATTTTAT | 245 |
| ATTTTCA | 141 |
| ATTTTCC | 101 |
| ATTTTCG | 90  |
| ATTTTCT | 216 |
| ATTTTGA | 170 |
| ATTTTGC | 133 |
| ATTTTGG | 130 |
| ATTTTGT | 188 |
| ATTTTTA | 242 |
| ATTTTTC | 184 |
| ATTTTTG | 180 |
| ATTTTTT | 462 |
| CAAAAAA | 299 |
| CAAAAAC | 133 |
| CAAAAAG | 123 |
| CAAAAAT | 159 |
| CAAAACA | 133 |
| CAAAACC | 115 |
| CAAAACG | 36  |
| CAAAACT | 123 |
| CAAAAGA | 83  |
| CAAAAGC | 108 |

|         |     |
|---------|-----|
| CAAAGG  | 72  |
| CAAAGT  | 101 |
| CAAATA  | 148 |
| CAAATC  | 126 |
| CAAATG  | 123 |
| CAAATT  | 180 |
| CAACAA  | 216 |
| CAACAC  | 180 |
| CAACAG  | 87  |
| CAACAT  | 126 |
| CAACCA  | 101 |
| CAACCC  | 76  |
| CAACCG  | 51  |
| CAACCT  | 76  |
| CAACGA  | 79  |
| CAACGC  | 58  |
| CAACGG  | 47  |
| CAACGT  | 11  |
| CAACTA  | 126 |
| CAACTC  | 97  |
| CAACTG  | 40  |
| CAACTT  | 126 |
| CAAAGAA | 130 |
| CAAAGAC | 79  |
| CAAAGAG | 65  |
| CAAAGAT | 108 |
| CAAAGCA | 97  |
| CAAAGCC | 76  |
| CAAAGCG | 51  |
| CAAAGCT | 69  |
| CAAAGGA | 76  |
| CAAAGGC | 58  |
| CAAAGGG | 79  |
| CAAAGGT | 90  |
| CAAAGTA | 76  |
| CAAAGTC | 32  |
| CAAAGTG | 69  |
| CAAAGTT | 83  |
| CAAATAA | 191 |
| CAAATAC | 72  |
| CAAATAG | 101 |
| CAAATAT | 170 |
| CAAATCA | 137 |
| CAAATCC | 90  |
| CAAATCG | 40  |
| CAAATCT | 148 |
| CAAATGA | 94  |
| CAAATGC | 58  |
| CAAATGG | 69  |
| CAAATGT | 90  |
| CAAATTA | 97  |
| CAAATTC | 126 |



|          |     |
|----------|-----|
| CAAATTG  | 90  |
| CAAATTT  | 202 |
| CAACAAA  | 133 |
| CAACAAA  | 133 |
| CAACAAC  | 166 |
| CAACAAG  | 79  |
| CAACACA  | 148 |
| CAACACC  | 58  |
| CAACACG  | 40  |
| CAACACT  | 43  |
| CAACAGA  | 97  |
| CAACAGC  | 83  |
| CAACAGG  | 43  |
| CAACAGT  | 58  |
| CAACATA  | 112 |
| CAACATC  | 76  |
| CAACATG  | 115 |
| CAACATT  | 87  |
| CAACCAA  | 126 |
| CAACCAC  | 97  |
| CAACCAG  | 79  |
| CAACCAT  | 79  |
| CAACCCA  | 97  |
| CAACCCC  | 54  |
| CAACCCG  | 54  |
| CAACCCCT | 79  |
| CAACCGA  | 51  |
| CAACCGC  | 36  |
| CAACCGG  | 43  |
| CAACCGT  | 22  |
| CAACCTA  | 76  |
| CAACCTC  | 58  |
| CAACCTG  | 22  |
| CAACCTT  | 69  |
| CAACGAA  | 40  |
| CAACGAC  | 90  |
| CAACGAG  | 47  |
| CAACGAT  | 43  |
| CAACGCA  | 58  |
| CAACGCC  | 25  |
| CAACGCG  | 29  |
| CAACGCT  | 47  |
| CAACGGA  | 65  |
| CAACGGC  | 94  |
| CAACGGG  | 36  |
| CAACGGT  | 72  |
| CAACGTA  | 22  |
| CAACGTC  | 32  |
| CAACGTG  | 51  |
| CAACGTT  | 40  |
| CAACTAA  | 105 |
| CAACTAC  | 51  |

|         |     |
|---------|-----|
| CAACTAG | 61  |
| CAACTAT | 65  |
| CAACTCA | 97  |
| CAACTCC | 94  |
| CAACTCG | 54  |
| CAACTCT | 51  |
| CAACTGA | 25  |
| CAACTGC | 51  |
| CAACTGG | 25  |
| CAACTGT | 40  |
| CAACTTA | 58  |
| CAACTTC | 69  |
| CAACTTG | 90  |
| CAACTTT | 112 |
| CAAGAAA | 152 |
| CAAGAAC | 58  |
| CAAGAAG | 101 |
| CAAGAAT | 90  |
| CAAGACA | 90  |
| CAAGACC | 36  |
| CAAGACG | 40  |
| CAAGACT | 18  |
| CAAGAGA | 119 |
| CAAGAGC | 83  |
| CAAGAGG | 126 |
| CAAGAGT | 51  |
| CAAGATA | 72  |
| CAAGATC | 54  |
| CAAGATG | 54  |
| CAAGATT | 130 |
| CAAGCAA | 137 |
| CAAGCAA | 137 |
| CAAGCAG | 87  |
| CAAGCAT | 90  |
| CAAGCCA | 83  |
| CAAGCCC | 90  |
| CAAGCCG | 40  |
| CAAGCCT | 69  |
| CAAGCGA | 69  |
| CAAGCGC | 43  |
| CAAGCGG | 14  |
| CAAGCGT | 43  |
| CAAGCTA | 90  |
| CAAGCTC | 76  |
| CAAGCTG | 36  |
| CAAGCTT | 51  |
| CAAGGAA | 76  |
| CAAGGAC | 47  |
| CAAGGAG | 72  |
| CAAGGAT | 79  |
| CAAGGCA | 61  |
| CAAGGCC | 69  |

|         |     |
|---------|-----|
| CAAGGCG | 43  |
| CAAGGCT | 76  |
| CAAGGGA | 61  |
| CAAGGGC | 72  |
| CAAGGGG | 29  |
| CAAGGGT | 69  |
| CAAGGTA | 47  |
| CAAGGTC | 51  |
| CAAGGTG | 47  |
| CAAGGTT | 69  |
| CAAGTAA | 54  |
| CAAGTAC | 54  |
| CAAGTAG | 47  |
| CAAGTAT | 101 |
| CAAGTCA | 69  |
| CAAGTCC | 51  |
| CAAGTCG | 36  |
| CAAGTCT | 40  |
| CAAGTGA | 94  |
| CAAGTGC | 87  |
| CAAGTGG | 83  |
| CAAGTGT | 43  |
| CAAGTTA | 22  |
| CAAGTTC | 87  |
| CAAGTTG | 72  |
| CAAGTTT | 101 |
| CAATAAA | 162 |
| CAATAAC | 54  |
| CAATAAG | 65  |
| CAATAAT | 112 |
| CAATACA | 72  |
| CAATACC | 47  |
| CAATACG | 14  |
| CAATACT | 29  |
| CAATAGA | 51  |
| CAATAGA | 51  |
| CAATAGC | 47  |
| CAATAGT | 58  |
| CAATATA | 115 |
| CAATATC | 51  |
| CAATATG | 83  |
| CAATATT | 79  |
| CAATCAA | 58  |
| CAATCAC | 76  |
| CAATCAG | 51  |
| CAATCAT | 65  |
| CAATCCA | 144 |
| CAATCCC | 69  |
| CAATCCG | 32  |
| CAATCCT | 101 |
| CAATCGA | 43  |
| CAATCGC | 54  |

|          |     |
|----------|-----|
| CAATCGG  | 54  |
| CAATCGT  | 29  |
| CAATCTA  | 54  |
| CAATCTC  | 90  |
| CAATCTG  | 32  |
| CAATCTT  | 87  |
| CAATGAA  | 90  |
| CAATGAC  | 72  |
| CAATGAG  | 36  |
| CAATGAT  | 69  |
| CAATGCA  | 76  |
| CAATGCC  | 40  |
| CAATGCG  | 25  |
| CAATGCT  | 54  |
| CAATGGA  | 32  |
| CAATGGC  | 32  |
| CAATGGG  | 69  |
| CAATGGT  | 22  |
| CAATGTA  | 72  |
| CAATGTC  | 22  |
| CAATGTG  | 32  |
| CAATGTT  | 69  |
| CAATTAA  | 83  |
| CAATTAC  | 29  |
| CAATTAG  | 51  |
| CAATTAT  | 112 |
| CAATTCA  | 101 |
| CAATTCC  | 40  |
| CAATTCCG | 29  |
| CAATTCT  | 101 |
| CAATTGA  | 83  |
| CAATTGC  | 36  |
| CAATTGG  | 69  |
| CAATTGT  | 61  |
| CAATTTA  | 101 |
| CAATTTTC | 83  |
| CAATTTG  | 79  |
| CAATTTT  | 123 |
| CACAAAA  | 115 |
| CACAAAC  | 90  |
| CACAAAG  | 90  |
| CACAAAT  | 72  |
| CACAACA  | 90  |
| CACAACC  | 61  |
| CACAACG  | 47  |
| CACAACT  | 54  |
| CACAAGA  | 94  |
| CACAAGC  | 65  |
| CACAAGG  | 79  |
| CACAAGT  | 97  |
| CACAATA  | 69  |
| CACAATC  | 43  |

|         |     |
|---------|-----|
| CACAATG | 40  |
| CACAATT | 108 |
| CACACAA | 105 |
| CACACAC | 148 |
| CACACAG | 65  |
| CACACAT | 123 |
| CACACCA | 72  |
| CACACCC | 61  |
| CACACCG | 69  |
| CACACCT | 51  |
| CACACGA | 51  |
| CACACGC | 54  |
| CACACGG | 54  |
| CACACGT | 61  |
| CACACTA | 65  |
| CACACTC | 65  |
| CACACTG | 54  |
| CACACTT | 51  |
| CACAGAA | 65  |
| CACAGAC | 18  |
| CACAGAG | 22  |
| CACAGAT | 51  |
| CACAGCA | 51  |
| CACAGCC | 119 |
| CACAGCG | 18  |
| CACAGCT | 54  |
| CACAGGA | 40  |
| CACAGGC | 54  |
| CACAGGG | 36  |
| CACAGGT | 47  |
| CACAGTA | 25  |
| CACAGTC | 11  |
| CACAGTG | 18  |
| CACAGTT | 25  |
| CACATAA | 65  |
| CACATAC | 47  |
| CACATAG | 76  |
| CACATAT | 126 |
| CACATCA | 97  |
| CACATCC | 90  |
| CACATCG | 40  |
| CACATCT | 108 |
| CACATGA | 133 |
| CACATGC | 108 |
| CACATGG | 72  |
| CACATGT | 126 |
| CACATTA | 72  |
| CACATTC | 65  |
| CACATTG | 14  |
| CACATTT | 108 |
| CACCAAA | 148 |
| CACCAAC | 126 |

|         |     |
|---------|-----|
| CACCAAG | 76  |
| CACCAAT | 43  |
| CACCACA | 97  |
| CACCACC | 184 |
| CACCACG | 51  |
| CACCACT | 101 |
| CACCAGA | 90  |
| CACCAGC | 90  |
| CACCAGG | 36  |
| CACCAGT | 61  |
| CACCATA | 51  |
| CACCATC | 87  |
| CACCATG | 69  |
| CACCATT | 65  |
| CACCCAA | 43  |
| CACCCAC | 79  |
| CACCCAG | 32  |
| CACCCAT | 58  |
| CACCCCA | 47  |
| CACCCCC | 94  |
| CACCCCG | 54  |
| CACCCCT | 76  |
| CACCCGA | 36  |
| CACCCGC | 72  |
| CACCCGG | 36  |
| CACCCGT | 29  |
| CACCCTA | 51  |
| CACCCTC | 72  |
| CACCCTG | 51  |
| CACCCTT | 83  |
| CACCGAA | 47  |
| CACCGAC | 61  |
| CACCGAG | 72  |
| CACCGAT | 65  |
| CACCGCA | 36  |
| CACCGCC | 94  |
| CACCGCG | 58  |
| CACCGCT | 61  |
| CACCGGA | 162 |
| CACCGGC | 36  |
| CACCGGG | 18  |
| CACCGGT | 36  |
| CACCGTA | 36  |
| CACCGTC | 87  |
| CACCGTG | 47  |
| CACCGTT | 54  |
| CACCTAA | 51  |
| CACCTAC | 61  |
| CACCTAG | 65  |
| CACCTAT | 72  |
| CACCTCA | 105 |
| CACCTCA | 105 |

|         |     |
|---------|-----|
| CACCTCC | 105 |
| CACCTCG | 54  |
| CACCTGA | 47  |
| CACCTGC | 61  |
| CACCTGG | 43  |
| CACCTGT | 58  |
| CACCTTA | 29  |
| CACCTTC | 79  |
| CACCTTG | 29  |
| CACCTTT | 72  |
| CACGAAA | 79  |
| CACGAAC | 40  |
| CACGAAG | 22  |
| CACGAAT | 22  |
| CACGACA | 58  |
| CACGACC | 40  |
| CACGACG | 25  |
| CACGACT | 32  |
| CACGAGA | 47  |
| CACGAGC | 72  |
| CACGAGG | 36  |
| CACGAGT | 32  |
| CACGATA | 25  |
| CACGATC | 36  |
| CACGATG | 7   |
| CACGATT | 29  |
| CACGCAA | 58  |
| CACGCAC | 76  |
| CACGCAG | 51  |
| CACGCAT | 58  |
| CACGCCA | 51  |
| CACGCCC | 54  |
| CACGCCG | 51  |
| CACGCCT | 51  |
| CACGCGA | 47  |
| CACGCGC | 58  |
| CACGCGG | 51  |
| CACGCGT | 36  |
| CACGCTA | 29  |
| CACGCTC | 40  |
| CACGCTG | 29  |
| CACGCTT | 79  |
| CACGGAA | 14  |
| CACGGAC | 36  |
| CACGGAG | 29  |
| CACGGAT | 54  |
| CACGGCA | 58  |
| CACGGCA | 58  |
| CACGGCG | 29  |
| CACGGCT | 29  |
| CACGGGA | 22  |
| CACGGGC | 65  |

|          |     |
|----------|-----|
| CACGGGG  | 32  |
| CACGGGT  | 29  |
| CACGGTA  | 22  |
| CACGGTC  | 51  |
| CACGGTG  | 76  |
| CACGGTT  | 54  |
| CACGTAA  | 29  |
| CACGTAC  | 105 |
| CACGTAG  | 32  |
| CACGTAT  | 22  |
| CACGTCA  | 61  |
| CACGTCC  | 54  |
| CACGTCCG | 76  |
| CACGTCT  | 43  |
| CACGTGA  | 40  |
| CACGTGC  | 72  |
| CACGTGG  | 54  |
| CACGTGT  | 32  |
| CACGTTA  | 18  |
| CACGTTC  | 32  |
| CACGTTG  | 29  |
| CACGTTT  | 32  |
| CACTAAA  | 72  |
| CACTAAC  | 40  |
| CACTAAG  | 40  |
| CACTAAT  | 54  |
| CACTACA  | 72  |
| CACTACC  | 47  |
| CACTACG  | 11  |
| CACTACT  | 58  |
| CACTAGA  | 54  |
| CACTAGC  | 61  |
| CACTAGG  | 40  |
| CACTAGT  | 51  |
| CACTATA  | 76  |
| CACTATC  | 32  |
| CACTATG  | 58  |
| CACTATT  | 72  |
| CACTCAA  | 79  |
| CACTCAC  | 40  |
| CACTCAG  | 32  |
| CACTCAT  | 90  |
| CACTCCA  | 76  |
| CACTCCC  | 47  |
| CACTCCG  | 40  |
| CACTCCT  | 90  |
| CACTCGA  | 32  |
| CACTCGC  | 72  |
| CACTCGG  | 51  |
| CACTCGT  | 32  |
| CACTCTA  | 54  |
| CACTCTC  | 101 |



|         |     |
|---------|-----|
| CACTCTG | 51  |
| CACTCTT | 43  |
| CACTGAA | 54  |
| CACTGAC | 36  |
| CACTGAG | 29  |
| CACTGAT | 36  |
| CACTGCA | 58  |
| CACTGCC | 83  |
| CACTGCG | 40  |
| CACTGCT | 83  |
| CACTGGA | 72  |
| CACTGGC | 36  |
| CACTGGG | 7   |
| CACTGGT | 76  |
| CACTGTA | 40  |
| CACTGTC | 105 |
| CACTGTG | 61  |
| CACTGTT | 58  |
| CACTTAA | 58  |
| CACTTAC | 25  |
| CACTTAG | 51  |
| CACTTAT | 54  |
| CACTTCA | 58  |
| CACTTCC | 54  |
| CACTTCG | 36  |
| CACTTCT | 97  |
| CACTTGA | 61  |
| CACTTGC | 58  |
| CACTTGG | 90  |
| CACTTGT | 126 |
| CACTTTA | 65  |
| CACTTTA | 65  |
| CACTTTC | 61  |
| CACTTTT | 119 |
| CAGAAAA | 126 |
| CAGAAAC | 79  |
| CAGAAAG | 76  |
| CAGAAAT | 72  |
| CAGAACA | 51  |
| CAGAACC | 47  |
| CAGAACG | 32  |
| CAGAACT | 25  |
| CAGAAGA | 32  |
| CAGAAGC | 90  |
| CAGAAGG | 29  |
| CAGAAGT | 47  |
| CAGAATA | 54  |
| CAGAATC | 47  |
| CAGAATG | 36  |
| CAGAATT | 58  |
| CAGACAA | 36  |
| CAGACAC | 58  |

|         |     |
|---------|-----|
| CAGACAG | 40  |
| CAGACAT | 58  |
| CAGACCA | 47  |
| CAGACCC | 32  |
| CAGACCG | 58  |
| CAGACCT | 18  |
| CAGACGA | 87  |
| CAGACGA | 87  |
| CAGACGG | 40  |
| CAGACGT | 14  |
| CAGACTA | 43  |
| CAGACTC | 43  |
| CAGACTG | 40  |
| CAGACTT | 40  |
| CAGAGAA | 97  |
| CAGAGAC | 25  |
| CAGAGAG | 65  |
| CAGAGAT | 25  |
| CAGAGCA | 40  |
| CAGAGCC | 43  |
| CAGAGCG | 18  |
| CAGAGCT | 47  |
| CAGAGGA | 79  |
| CAGAGGC | 25  |
| CAGAGGG | 54  |
| CAGAGGT | 47  |
| CAGAGTA | 32  |
| CAGAGTC | 29  |
| CAGAGTG | 61  |
| CAGAGTT | 40  |
| CAGATAA | 65  |
| CAGATAC | 18  |
| CAGATAG | 58  |
| CAGATAT | 58  |
| CAGATCA | 54  |
| CAGATCC | 51  |
| CAGATCG | 22  |
| CAGATCT | 69  |
| CAGATGA | 51  |
| CAGATGC | 72  |
| CAGATGG | 54  |
| CAGATGT | 58  |
| CAGATTA | 47  |
| CAGATTC | 76  |
| CAGATTG | 32  |
| CAGATTT | 90  |
| CAGCAAA | 72  |
| CAGCAAC | 101 |
| CAGCAAG | 83  |
| CAGCAAT | 32  |
| CAGCACA | 94  |
| CAGCACC | 54  |

|         |     |
|---------|-----|
| CAGCACG | 25  |
| CAGCACT | 54  |
| CAGCAGA | 54  |
| CAGCAGC | 148 |
| CAGCAGG | 69  |
| CAGCAGT | 101 |
| CAGCATA | 32  |
| CAGCATC | 65  |
| CAGCATG | 69  |
| CAGCATT | 58  |
| CAGCCAA | 101 |
| CAGCCAC | 105 |
| CAGCCAG | 97  |
| CAGCCAT | 47  |
| CAGCCCA | 76  |
| CAGCCCC | 72  |
| CAGCCCG | 40  |
| CAGCCCT | 87  |
| CAGCCGA | 40  |
| CAGCCGC | 112 |
| CAGCCGG | 58  |
| CAGCCGT | 47  |
| CAGCCTA | 76  |
| CAGCCTC | 29  |
| CAGCCTG | 29  |
| CAGCCTT | 40  |
| CAGCGAA | 36  |
| CAGCGAC | 58  |
| CAGCGAG | 43  |
| CAGCGAT | 36  |
| CAGCGCA | 29  |
| CAGCGCC | 43  |
| CAGCGCG | 29  |
| CAGCGCT | 54  |
| CAGCGGA | 43  |
| CAGCGGC | 40  |
| CAGCGGG | 25  |
| CAGCGGT | 25  |
| CAGCGTA | 7   |
| CAGCGTC | 29  |
| CAGCGTG | 32  |
| CAGCGTT | 11  |
| CAGCTAA | 61  |
| CAGCTAC | 36  |
| CAGCTAG | 108 |
| CAGCTAT | 51  |
| CAGCTCA | 90  |
| CAGCTCC | 69  |
| CAGCTCG | 51  |
| CAGCTCT | 43  |
| CAGCTGA | 25  |
| CAGCTGC | 65  |

|         |    |
|---------|----|
| CAGCTGG | 47 |
| CAGCTGT | 32 |
| CAGCTTA | 7  |
| CAGCTTC | 54 |
| CAGCTTG | 51 |
| CAGCTTT | 90 |
| CAGGAAA | 76 |
| CAGGAAC | 54 |
| CAGGAAG | 18 |
| CAGGAAT | 25 |
| CAGGACA | 25 |
| CAGGACC | 43 |
| CAGGACG | 32 |
| CAGGACT | 43 |
| CAGGAGA | 58 |
| CAGGAGC | 32 |
| CAGGAGG | 61 |
| CAGGAGT | 40 |
| CAGGATA | 29 |
| CAGGATC | 36 |
| CAGGATG | 22 |
| CAGGATT | 36 |
| CAGGCAA | 47 |
| CAGGCAC | 40 |
| CAGGCAG | 51 |
| CAGGCAT | 32 |
| CAGGCCA | 47 |
| CAGGCCC | 25 |
| CAGGCCG | 47 |
| CAGGCCT | 32 |
| CAGGCGA | 36 |
| CAGGCGC | 54 |
| CAGGCGG | 51 |
| CAGGCGT | 18 |
| CAGGCTA | 54 |
| CAGGCTC | 54 |
| CAGGCTG | 58 |
| CAGGCTT | 32 |
| CAGGGAA | 43 |
| CAGGGAC | 40 |
| CAGGGAG | 47 |
| CAGGGAT | 14 |
| CAGGGCA | 72 |
| CAGGGCA | 72 |
| CAGGGCC | 40 |
| CAGGGCT | 36 |
| CAGGGGA | 40 |
| CAGGGGC | 40 |
| CAGGGGG | 54 |
| CAGGGGT | 14 |
| CAGGGTA | 22 |
| CAGGGTC | 36 |

|         |     |
|---------|-----|
| CAGGGTG | 54  |
| CAGGGTT | 25  |
| CAGGTAA | 47  |
| CAGGTAC | 40  |
| CAGGTAG | 40  |
| CAGGTAT | 32  |
| CAGGTCA | 43  |
| CAGGTCC | 101 |
| CAGGTCG | 22  |
| CAGGTCT | 43  |
| CAGGTGA | 11  |
| CAGGTGC | 40  |
| CAGGTGG | 43  |
| CAGGTGT | 29  |
| CAGGTTA | 22  |
| CAGGTTC | 51  |
| CAGGTTG | 47  |
| CAGGTTT | 36  |
| CAGTAAA | 32  |
| CAGTAAC | 29  |
| CAGTAAG | 25  |
| CAGTAAT | 54  |
| CAGTACA | 43  |
| CAGTACC | 36  |
| CAGTACG | 29  |
| CAGTACT | 29  |
| CAGTAGA | 32  |
| CAGTAGC | 47  |
| CAGTAGG | 40  |
| CAGTAGT | 43  |
| CAGTATA | 18  |
| CAGTATC | 29  |
| CAGTATG | 29  |
| CAGTATT | 65  |
| CAGTCAA | 43  |
| CAGTCAC | 29  |
| CAGTCAG | 58  |
| CAGTCAT | 32  |
| CAGTCCA | 54  |
| CAGTCCC | 32  |
| CAGTCCG | 76  |
| CAGTCCT | 36  |
| CAGTCGA | 32  |
| CAGTCGC | 40  |
| CAGTCGG | 32  |
| CAGTCGT | 25  |
| CAGTCTA | 76  |
| CAGTCTC | 47  |
| CAGTCTG | 36  |
| CAGTCTT | 43  |
| CAGTGAA | 29  |
| CAGTGAC | 54  |

|         |     |
|---------|-----|
| CAGTGAG | 47  |
| CAGTGAT | 47  |
| CAGTGCA | 69  |
| CAGTGCC | 54  |
| CAGTGCG | 25  |
| CAGTGCT | 40  |
| CAGTGGA | 29  |
| CAGTGGC | 47  |
| CAGTGGG | 29  |
| CAGTGGT | 51  |
| CAGTGTA | 25  |
| CAGTGTC | 72  |
| CAGGTG  | 36  |
| CAGTGTT | 32  |
| CAGTTAA | 29  |
| CAGTTAC | 7   |
| CAGTTAG | 43  |
| CAGTTAT | 40  |
| CAGTTCA | 40  |
| CAGTTCC | 14  |
| CAGTTCG | 18  |
| CAGTTCT | 29  |
| CAGTTGA | 40  |
| CAGTTGC | 47  |
| CAGTTGG | 47  |
| CAGTTGT | 47  |
| CAGTTTA | 58  |
| CAGTTTA | 58  |
| CAGTTTC | 58  |
| CAGTTTG | 43  |
| CATAAAA | 166 |
| CATAAAC | 61  |
| CATAAAG | 79  |
| CATAAAT | 188 |
| CATAACA | 72  |
| CATAACC | 47  |
| CATAACG | 29  |
| CATAACT | 61  |
| CATAAGA | 54  |
| CATAAGC | 32  |
| CATAAGG | 58  |
| CATAAGT | 54  |
| CATAATA | 94  |
| CATAATC | 58  |
| CATAATG | 25  |
| CATAATT | 83  |
| CATACAA | 51  |
| CATACAC | 40  |
| CATACAG | 47  |
| CATACAT | 101 |
| CATACCA | 83  |
| CATACCC | 32  |

|         |     |
|---------|-----|
| CATACCG | 36  |
| CATACCT | 61  |
| CATACGA | 14  |
| CATACGC | 29  |
| CATACGG | 22  |
| CATACGT | 25  |
| CATACTA | 32  |
| CATACTC | 54  |
| CATACTG | 29  |
| CATACTT | 32  |
| CATAGAA | 79  |
| CATAGAC | 40  |
| CATAGAG | 69  |
| CATAGAT | 72  |
| CATAGCA | 47  |
| CATAGCC | 25  |
| CATAGCG | 11  |
| CATAGCT | 32  |
| CATAGGA | 40  |
| CATAGGC | 40  |
| CATAGGG | 22  |
| CATAGGT | 36  |
| CATAGTA | 69  |
| CATAGTC | 36  |
| CATAGTG | 61  |
| CATAGTT | 97  |
| CATATAA | 159 |
| CATATAC | 54  |
| CATATAG | 72  |
| CATATAT | 249 |
| CATATCA | 90  |
| CATATCC | 58  |
| CATATCG | 36  |
| CATATCT | 87  |
| CATATGA | 130 |
| CATATGC | 61  |
| CATATGG | 101 |
| CATATGT | 115 |
| CATATTA | 83  |
| CATATTC | 43  |
| CATATTG | 58  |
| CATATTT | 177 |
| CATCAAA | 108 |
| CATCAAC | 94  |
| CATCAAG | 76  |
| CATCAAT | 54  |
| CATCACA | 87  |
| CATCACC | 87  |
| CATCACG | 47  |
| CATCACT | 123 |
| CATCAGA | 69  |
| CATCAGC | 47  |

|         |     |
|---------|-----|
| CATCAGG | 51  |
| CATCAGT | 76  |
| CATCATA | 87  |
| CATCATC | 87  |
| CATCATG | 72  |
| CATCATT | 108 |
| CATCCAA | 108 |
| CATCCAC | 94  |
| CATCCAG | 32  |
| CATCCAT | 130 |
| CATCCCA | 61  |
| CATCCCC | 76  |
| CATCCCG | 43  |
| CATCCCT | 87  |
| CATCCGA | 14  |
| CATCCGC | 43  |
| CATCCGG | 36  |
| CATCCGT | 36  |
| CATCCTA | 79  |
| CATCCTC | 83  |
| CATCCTG | 58  |
| CATCCTT | 90  |
| CATCGAA | 40  |
| CATCGAC | 29  |
| CATCGAG | 36  |
| CATCGAT | 76  |
| CATCGCA | 14  |
| CATCGCC | 72  |
| CATCGCG | 29  |
| CATCGCT | 32  |
| CATCGGA | 40  |
| CATCGGC | 29  |
| CATCGGG | 36  |
| CATCGGT | 43  |
| CATCGTA | 36  |
| CATCGTC | 29  |
| CATCGTG | 51  |
| CATCGTT | 58  |
| CATCTAA | 61  |
| CATCTAC | 69  |
| CATCTAG | 51  |
| CATCTAT | 101 |
| CATCTCA | 101 |
| CATCTCC | 97  |
| CATCTCG | 51  |
| CATCTCT | 137 |
| CATCTGA | 126 |
| CATCTGC | 65  |
| CATCTGG | 40  |
| CATCTGT | 94  |
| CATCTTA | 61  |
| CATCTTC | 123 |



|         |     |
|---------|-----|
| CATCTTG | 94  |
| CATCTTT | 123 |
| CATGAAA | 76  |
| CATGAAC | 97  |
| CATGAAG | 51  |
| CATGAAT | 65  |
| CATGACA | 65  |
| CATGACC | 54  |
| CATGACG | 43  |
| CATGACT | 79  |
| CATGAGA | 51  |
| CATGAGC | 90  |
| CATGAGG | 47  |
| CATGAGT | 58  |
| CATGATA | 94  |
| CATGATC | 61  |
| CATGATG | 101 |
| CATGATT | 105 |
| CATGCAA | 133 |
| CATGCAA | 133 |
| CATGCAC | 123 |
| CATGCAT | 234 |
| CATGCCA | 58  |
| CATGCCC | 72  |
| CATGCCG | 79  |
| CATGCCT | 87  |
| CATGCGA | 32  |
| CATGCGC | 47  |
| CATGCGG | 43  |
| CATGCGT | 51  |
| CATGCTA | 54  |
| CATGCTC | 69  |
| CATGCTG | 83  |
| CATGCTT | 159 |
| CATGGAA | 72  |
| CATGGAC | 58  |
| CATGGAG | 87  |
| CATGGAT | 108 |
| CATGGCA | 72  |
| CATGGCC | 40  |
| CATGGCG | 47  |
| CATGGCT | 65  |
| CATGGGA | 43  |
| CATGGGC | 79  |
| CATGGGG | 51  |
| CATGGGT | 47  |
| CATGGTA | 43  |
| CATGGTC | 72  |
| CATGGTG | 58  |
| CATGGTT | 105 |
| CATGTAA | 133 |
| CATGTAC | 83  |

|         |     |
|---------|-----|
| CATGTAG | 87  |
| CATGTAT | 137 |
| CATGTCA | 65  |
| CATGTCC | 72  |
| CATGTCG | 40  |
| CATGTCT | 123 |
| CATGTGA | 101 |
| CATGTGC | 94  |
| CATGTGG | 87  |
| CATGTGT | 137 |
| CATGTTA | 90  |
| CATGTTC | 76  |
| CATGTTG | 83  |
| CATGTTT | 126 |
| CATTAAG | 58  |
| CATTAAT | 119 |
| CATTACA | 65  |
| CATTACC | 7   |
| CATTACG | 22  |
| CATTACT | 65  |
| CATTAGA | 65  |
| CATTAGA | 65  |
| CATTAGC | 25  |
| CATTAGG | 29  |
| CATTATA | 87  |
| CATTATC | 51  |
| CATTATG | 51  |
| CATTATT | 119 |
| CATTCAA | 72  |
| CATTCAC | 32  |
| CATTCAG | 47  |
| CATTCAT | 69  |
| CATTCCA | 108 |
| CATTCCC | 79  |
| CATTCCG | 29  |
| CATTCCT | 97  |
| CATTCGA | 36  |
| CATTCGC | 18  |
| CATTCGG | 36  |
| CATTCGT | 43  |
| CATTCTA | 69  |
| CATTCTC | 65  |
| CATTCTG | 29  |
| CATTCTT | 87  |
| CATTGAA | 65  |
| CATTGAC | 54  |
| CATTGAG | 43  |
| CATTGAT | 72  |
| CATTGCA | 83  |
| CATTGCC | 36  |

|          |     |
|----------|-----|
| CATTGCG  | 25  |
| CATTGCT  | 43  |
| CATTGGA  | 65  |
| CATTGGC  | 51  |
| CATTGGG  | 40  |
| CATTGGT  | 51  |
| CATTGTA  | 43  |
| CATTGTC  | 72  |
| CATTGTG  | 22  |
| CATTGTT  | 83  |
| CATTTAA  | 166 |
| CATTTAC  | 58  |
| CATTTAG  | 105 |
| CATTTAT  | 130 |
| CATTTCA  | 51  |
| CATTTCC  | 54  |
| CATTTCCG | 76  |
| CATTTCT  | 123 |
| CATTTGA  | 144 |
| CATTTGC  | 97  |
| CATTTGG  | 69  |
| CATTTGT  | 105 |
| CATTTTA  | 133 |
| CATTTTC  | 133 |
| CATTTTG  | 137 |
| CATTTTT  | 231 |
| CCAAAAA  | 195 |
| CCAAAAC  | 119 |
| CCAAAAG  | 123 |
| CCAAAAT  | 148 |
| CCAAACA  | 166 |
| CCAAACC  | 101 |
| CCAAACG  | 61  |
| CCAAACT  | 87  |
| CCAAAGA  | 79  |
| CCAAAGC  | 123 |
| CCAAAGG  | 69  |
| CCAAAGT  | 43  |
| CCAAATA  | 119 |
| CCAAATC  | 126 |
| CCAAATG  | 76  |
| CCAAATT  | 137 |
| CCAACAA  | 126 |
| CCAACAC  | 61  |
| CCAACAG  | 54  |
| CCAACAT  | 94  |
| CCAACCA  | 133 |
| CCAACCC  | 101 |
| CCAACCG  | 32  |
| CCAACCT  | 51  |
| CCAACGA  | 76  |
| CCAACGC  | 29  |

|         |     |
|---------|-----|
| CCAACGG | 97  |
| CCAACGT | 32  |
| CCAACTA | 61  |
| CCAACTC | 119 |
| CCAACTG | 32  |
| CCAACTT | 58  |
| CCAAGAA | 94  |
| CCAAGAC | 72  |
| CCAAGAG | 97  |
| CCAAGAT | 83  |
| CCAAGCA | 123 |
| CCAAGCC | 105 |
| CCAAGCG | 32  |
| CCAAGCT | 72  |
| CCAAGGA | 43  |
| CCAAGGC | 76  |
| CCAAGGG | 51  |
| CCAAGGT | 79  |
| CCAAGTA | 58  |
| CCAAGTA | 58  |
| CCAAGTG | 69  |
| CCAAGTT | 54  |
| CCAATAA | 97  |
| CCAATAC | 29  |
| CCAATAG | 76  |
| CCAATAT | 61  |
| CCAATCA | 61  |
| CCAATCC | 108 |
| CCAATCG | 65  |
| CCAATCT | 61  |
| CCAATGA | 61  |
| CCAATGC | 47  |
| CCAATGG | 54  |
| CCAATGT | 40  |
| CCAATTA | 54  |
| CCAATTC | 76  |
| CCAATTG | 69  |
| CCAATTT | 101 |
| CCACAAA | 61  |
| CCACAAC | 51  |
| CCACAAG | 87  |
| CCACAAT | 87  |
| CCACACA | 72  |
| CCACACC | 65  |
| CCACACG | 58  |
| CCACACT | 69  |
| CCACAGA | 54  |
| CCACAGC | 65  |
| CCACAGG | 61  |
| CCACAGT | 14  |
| CCACATA | 61  |
| CCACATC | 115 |

|         |     |
|---------|-----|
| CCACATG | 87  |
| CCACATT | 58  |
| CCACCAA | 133 |
| CCACCAC | 231 |
| CCACCAG | 79  |
| CCACCAT | 76  |
| CCACCCA | 69  |
| CCACCCC | 101 |
| CCACCCG | 51  |
| CCACCCT | 69  |
| CCACCGA | 51  |
| CCACCGC | 87  |
| CCACCGG | 51  |
| CCACCGT | 72  |
| CCACCTA | 51  |
| CCACCTC | 162 |
| CCACCTG | 72  |
| CCACCTT | 72  |
| CCACGAA | 43  |
| CCACGAC | 51  |
| CCACGAG | 47  |
| CCACGAT | 25  |
| CCACGCA | 76  |
| CCACGCC | 51  |
| CCACGCG | 79  |
| CCACGCT | 32  |
| CCACGGA | 36  |
| CCACGGC | 51  |
| CCACGGG | 40  |
| CCACGGT | 54  |
| CCACGTA | 76  |
| CCACGTC | 72  |
| CCACGTG | 47  |
| CCACGTT | 22  |
| CCACTAA | 29  |
| CCACTAC | 58  |
| CCACTAG | 29  |
| CCACTAT | 72  |
| CCACTCA | 54  |
| CCACTCC | 61  |
| CCACTCG | 65  |
| CCACTCT | 83  |
| CCACTGA | 40  |
| CCACTGC | 101 |
| CCACTGG | 47  |
| CCACTGT | 36  |
| CCACTTA | 36  |
| CCACTTC | 87  |
| CCACTTG | 90  |
| CCACTTT | 90  |
| CCAGAAA | 76  |
| CCAGAAC | 58  |

|         |     |
|---------|-----|
| CCAGAAG | 54  |
| CCAGAAT | 76  |
| CCAGACA | 69  |
| CCAGACC | 54  |
| CCAGACG | 61  |
| CCAGACT | 25  |
| CCAGAGA | 61  |
| CCAGAGC | 40  |
| CCAGAGG | 58  |
| CCAGAGT | 40  |
| CCAGATA | 65  |
| CCAGATC | 61  |
| CCAGATG | 76  |
| CCAGATT | 72  |
| CCAGCAA | 72  |
| CCAGCAA | 72  |
| CCAGCAC | 69  |
| CCAGCAG | 90  |
| CCAGCCA | 133 |
| CCAGCCC | 108 |
| CCAGCCG | 76  |
| CCAGCCT | 69  |
| CCAGCGA | 36  |
| CCAGCGC | 25  |
| CCAGCGG | 14  |
| CCAGCGT | 32  |
| CCAGCTA | 54  |
| CCAGCTC | 83  |
| CCAGCTG | 61  |
| CCAGCTT | 51  |
| CCAGGAA | 29  |
| CCAGGAC | 43  |
| CCAGGAG | 25  |
| CCAGGAT | 40  |
| CCAGGCA | 61  |
| CCAGGCC | 22  |
| CCAGGCG | 25  |
| CCAGGCT | 54  |
| CCAGGGA | 29  |
| CCAGGGC | 47  |
| CCAGGGG | 47  |
| CCAGGGT | 40  |
| CCAGGTA | 22  |
| CCAGGTC | 54  |
| CCAGGTG | 36  |
| CCAGGTT | 36  |
| CCAGTAA | 36  |
| CCAGTAC | 14  |
| CCAGTAG | 29  |
| CCAGTAT | 29  |
| CCAGTCA | 47  |
| CCAGTCC | 54  |

|         |     |
|---------|-----|
| CCAGTCG | 40  |
| CCAGTCT | 47  |
| CCAGTGA | 47  |
| CCAGTGC | 54  |
| CCAGTGG | 29  |
| CCAGTGT | 25  |
| CCAGTTA | 18  |
| CCAGTTC | 4   |
| CCAGTTG | 29  |
| CCAGTTT | 87  |
| CCATAAA | 126 |
| CCATAAC | 51  |
| CCATAAG | 25  |
| CCATAAT | 58  |
| CCATACA | 25  |
| CCATACC | 32  |
| CCATACG | 22  |
| CCATACT | 32  |
| CCATAGA | 40  |
| CCATAGC | 43  |
| CCATAGG | 29  |
| CCATAGT | 83  |
| CCATATA | 87  |
| CCATATC | 43  |
| CCATATG | 108 |
| CCATATT | 58  |
| CCATCAA | 76  |
| CCATCAC | 101 |
| CCATCAG | 51  |
| CCATCAT | 94  |
| CCATCCA | 108 |
| CCATCCC | 76  |
| CCATCCG | 58  |
| CCATCCT | 87  |
| CCATCGA | 72  |
| CCATCGC | 51  |
| CCATCGG | 47  |
| CCATCGT | 51  |
| CCATCTA | 51  |
| CCATCTC | 101 |
| CCATCTG | 101 |
| CCATCTT | 119 |
| CCATGAA | 65  |
| CCATGAC | 32  |
| CCATGAG | 51  |
| CCATGAT | 61  |
| CCATGCA | 108 |
| CCATGCC | 65  |
| CCATGCG | 40  |
| CCATGCT | 87  |
| CCATGGA | 51  |
| CCATGGC | 79  |

|          |     |
|----------|-----|
| CCATGGG  | 43  |
| CCATGGT  | 47  |
| CCATGTA  | 97  |
| CCATGTC  | 108 |
| CCATGTG  | 76  |
| CCATGTT  | 72  |
| CCATTAA  | 61  |
| CCATTAC  | 25  |
| CCATTAG  | 58  |
| CCATTAT  | 65  |
| CCATTCA  | 40  |
| CCATTCC  | 123 |
| CCATTCCG | 36  |
| CCATTCT  | 47  |
| CCATTGA  | 36  |
| CCATTGC  | 54  |
| CCATTGG  | 72  |
| CCATTGT  | 43  |
| CCATTTA  | 76  |
| CCATTTC  | 69  |
| CCATTTG  | 126 |
| CCATTTT  | 97  |
| CCCAAAA  | 112 |
| CCCAAAC  | 112 |
| CCCAAAG  | 61  |
| CCCAAAT  | 90  |
| CCCAACA  | 79  |
| CCCAACC  | 90  |
| CCCAACG  | 54  |
| CCCAACT  | 61  |
| CCCAAGA  | 83  |
| CCCAAGC  | 79  |
| CCCAAGG  | 94  |
| CCCAAGT  | 51  |
| CCCAATA  | 61  |
| CCCAATC  | 83  |
| CCCAATG  | 58  |
| CCCAATT  | 51  |
| CCCACAA  | 61  |
| CCCACAC  | 65  |
| CCCACAG  | 51  |
| CCCACAT  | 90  |
| CCCACCA  | 97  |
| CCCACCC  | 105 |
| CCCACCG  | 54  |
| CCCACCT  | 72  |
| CCCACGA  | 79  |
| CCCACGA  | 79  |
| CCCACGC  | 61  |
| CCCACGT  | 58  |
| CCCAC TA | 36  |
| CCCAC TC | 79  |



|         |     |
|---------|-----|
| CCCCTG  | 25  |
| CCCCTT  | 69  |
| CCCAGAA | 32  |
| CCCAGAC | 40  |
| CCCAGAG | 29  |
| CCCAGAT | 58  |
| CCCAGCA | 40  |
| CCCAGCC | 87  |
| CCCAGCG | 14  |
| CCCAGCT | 25  |
| CCCAGGA | 22  |
| CCCAGGC | 51  |
| CCCAGGG | 25  |
| CCCAGGT | 36  |
| CCCAGTA | 7   |
| CCCAGTC | 58  |
| CCCAGTG | 18  |
| CCCAGTT | 18  |
| CCCATAA | 65  |
| CCCATAC | 18  |
| CCCATAG | 29  |
| CCCATAT | 76  |
| CCCATCA | 76  |
| CCCATCC | 94  |
| CCCATCG | 25  |
| CCCATCT | 105 |
| CCCATGA | 43  |
| CCCATGC | 58  |
| CCCATGG | 58  |
| CCCATGT | 83  |
| CCCATTA | 47  |
| CCCATTC | 61  |
| CCCATTG | 36  |
| CCCATTT | 69  |
| CCCCAAA | 72  |
| CCCCAAC | 76  |
| CCCCAAG | 87  |
| CCCCAAT | 79  |
| CCCCACA | 83  |
| CCCCACC | 123 |
| CCCCACG | 61  |
| CCCCACT | 54  |
| CCCCAGA | 36  |
| CCCCAGC | 36  |
| CCCCAGG | 25  |
| CCCCAGT | 32  |
| CCCCATA | 43  |
| CCCCATC | 90  |
| CCCCATG | 40  |
| CCCCATT | 51  |
| CCCCCAA | 101 |
| CCCCCAC | 87  |

|         |     |
|---------|-----|
| CCCCCAG | 32  |
| CCCCCAT | 65  |
| CCCCCCA | 58  |
| CCCCCCC | 144 |
| CCCCCCG | 29  |
| CCCCCCT | 69  |
| CCCCCGA | 54  |
| CCCCCGC | 65  |
| CCCCCGG | 54  |
| CCCCCGT | 32  |
| CCCCCTA | 43  |
| CCCCCTC | 112 |
| CCCCCTG | 47  |
| CCCCCTT | 133 |
| CCCCGAA | 43  |
| CCCCGAC | 47  |
| CCCCGAG | 47  |
| CCCCGAT | 29  |
| CCCCGCA | 43  |
| CCCCGCC | 76  |
| CCCCGCG | 40  |
| CCCCGCT | 22  |
| CCCCGGA | 43  |
| CCCCGGC | 51  |
| CCCCGGG | 22  |
| CCCCGGT | 40  |
| CCCCGTA | 18  |
| CCCCGTC | 58  |
| CCCCGTG | 54  |
| CCCCGTT | 72  |
| CCCCTAA | 69  |
| CCCCTAA | 69  |
| CCCCTAG | 25  |
| CCCCTAT | 29  |
| CCCCTCA | 32  |
| CCCCTCC | 144 |
| CCCCTCG | 36  |
| CCCCTCT | 148 |
| CCCCTGA | 61  |
| CCCCTGC | 61  |
| CCCCTGG | 40  |
| CCCCTGT | 32  |
| CCCCTTA | 43  |
| CCCCTTC | 87  |
| CCCCTTG | 58  |
| CCCCTTT | 130 |
| CCCGAAA | 36  |
| CCCGAAC | 25  |
| CCCGAAG | 25  |
| CCCGAAT | 36  |
| CCCGACA | 61  |
| CCCGACC | 51  |

|         |     |
|---------|-----|
| CCCGAOG | 61  |
| CCCGACT | 25  |
| CCCGAGA | 40  |
| CCCGAGC | 47  |
| CCCGAGG | 32  |
| CCCGAGT | 61  |
| CCCGATA | 32  |
| CCCGATC | 40  |
| CCCGATG | 18  |
| CCCGATT | 4   |
| CCCGCAA | 40  |
| CCCGCAC | 47  |
| CCCGCAG | 25  |
| CCCGCAT | 14  |
| CCCGCCA | 40  |
| CCCGCCC | 115 |
| CCCGCCG | 76  |
| CCCGCCT | 36  |
| CCCGCGA | 36  |
| CCCGCGC | 97  |
| CCCGCGG | 43  |
| CCCGCGT | 25  |
| CCCGCTA | 22  |
| CCCGCTC | 54  |
| CCCGCTG | 32  |
| CCCGCTT | 40  |
| CCCGGAA | 25  |
| CCCGGAC | 43  |
| CCCGGAG | 7   |
| CCCGGAT | 36  |
| CCCGGCA | 18  |
| CCCGGCA | 18  |
| CCCGGCC | 94  |
| CCCGGCG | 47  |
| CCCGGGA | 36  |
| CCCGGGC | 22  |
| CCCGGGG | 32  |
| CCCGGGT | 18  |
| CCCGGTA | 22  |
| CCCGGTC | 36  |
| CCCGGTG | 36  |
| CCCGGTT | 51  |
| CCCGTAA | 14  |
| CCCGTAC | 32  |
| CCCGTAG | 14  |
| CCCGTAT | 7   |
| CCCGTCA | 29  |
| CCCGTCC | 69  |
| CCCGTCG | 61  |
| CCCGTCT | 43  |
| CCCGTGA | 32  |
| CCCGTGC | 65  |

|         |     |
|---------|-----|
| CCCGTGG | 47  |
| CCCGTGT | 36  |
| CCCGTTA | 32  |
| CCCGTTC | 43  |
| CCCGTTG | 51  |
| CCCGTTT | 83  |
| CCCTAAA | 54  |
| CCCTAAC | 58  |
| CCCTAAG | 76  |
| CCCTAAT | 61  |
| CCCTACA | 29  |
| CCCTACC | 65  |
| CCCTACG | 18  |
| CCCTACT | 29  |
| CCCTAGA | 43  |
| CCCTAGC | 97  |
| CCCTAGG | 40  |
| CCCTAGT | 40  |
| CCCTATA | 36  |
| CCCTATC | 58  |
| CCCTATG | 36  |
| CCCTATT | 72  |
| CCCTCAA | 61  |
| CCCTCAC | 79  |
| CCCTCAG | 22  |
| CCCTCAT | 54  |
| CCCTCCA | 87  |
| CCCTCCC | 101 |
| CCCTCCG | 83  |
| CCCTCCT | 148 |
| CCCTCGA | 36  |
| CCCTCGC | 51  |
| CCCTCGG | 18  |
| CCCTCGT | 47  |
| CCCTCTA | 90  |
| CCCTCTC | 198 |
| CCCTCTG | 14  |
| CCCTCTT | 87  |
| CCCTGAA | 40  |
| CCCTGAC | 25  |
| CCCTGAG | 32  |
| CCCTGAT | 32  |
| CCCTGCA | 51  |
| CCCTGCC | 87  |
| CCCTGCG | 32  |
| CCCTGCT | 87  |
| CCCTGGA | 29  |
| CCCTGGC | 58  |
| CCCTGGG | 58  |
| CCCTGGT | 54  |
| CCCTGTA | 43  |
| CCCTGTC | 54  |

|         |     |
|---------|-----|
| CCCTGTG | 54  |
| CCCTGTT | 61  |
| CCCTTAA | 47  |
| CCCTTAC | 36  |
| CCCTTAG | 58  |
| CCCTTAT | 51  |
| CCCTTCA | 61  |
| CCCTTCC | 94  |
| CCCTTCG | 72  |
| CCCTTCT | 83  |
| CCCTTGA | 51  |
| CCCTTGC | 83  |
| CCCTTGG | 76  |
| CCCTTGT | 69  |
| CCCTTTA | 61  |
| CCCTTTC | 130 |
| CCCTTTG | 76  |
| CCCTTTT | 123 |
| CCGAAAA | 36  |
| CCGAAAC | 69  |
| CCGAAAG | 47  |
| CCGAAAT | 32  |
| CCGAACA | 40  |
| CCGAACC | 79  |
| CCGAACG | 32  |
| CCGAACT | 22  |
| CCGAAGA | 65  |
| CCGAAGC | 29  |
| CCGAAGG | 14  |
| CCGAAGT | 25  |
| CCGAATA | 43  |
| CCGAATC | 22  |
| CCGAATG | 22  |
| CCGAATT | 40  |
| CCGACAA | 61  |
| CCGACAC | 29  |
| CCGACAG | 36  |
| CCGACAT | 18  |
| CCGACCA | 54  |
| CCGACCC | 43  |
| CCGACCG | 76  |
| CCGACCT | 36  |
| CCGACGA | 69  |
| CCGACGA | 69  |
| CCGACGC | 32  |
| CCGACGG | 58  |
| CCGACTA | 25  |
| CCGACTC | 25  |
| CCGACTG | 11  |
| CCGACTT | 25  |
| CCGAGAA | 40  |
| CCGAGAC | 36  |

|         |     |
|---------|-----|
| CCGAGAG | 51  |
| CCGAGAT | 32  |
| CCGAGCA | 32  |
| CCGAGCC | 94  |
| CCGAGCG | 40  |
| CCGAGCT | 65  |
| CCGAGGA | 18  |
| CCGAGGC | 61  |
| CCGAGGG | 58  |
| CCGAGGT | 32  |
| CCGAGTA | 32  |
| CCGAGTC | 58  |
| CCGAGTG | 79  |
| CCGAGTT | 32  |
| CCGATAA | 29  |
| CCGATAC | 25  |
| CCGATAG | 11  |
| CCGATAT | 22  |
| CCGATCA | 25  |
| CCGATCC | 94  |
| CCGATCG | 65  |
| CCGATCT | 47  |
| CCGATGA | 51  |
| CCGATGC | 40  |
| CCGATGG | 36  |
| CCGATGT | 25  |
| CCGATTA | 25  |
| CCGATTC | 22  |
| CCGATTG | 25  |
| CCGATTT | 43  |
| CCGCAA  | 36  |
| CCGCAAC | 47  |
| CCGCAAG | 29  |
| CCGCAAT | 18  |
| CCGCACA | 22  |
| CCGCACC | 61  |
| CCGCACG | 54  |
| CCGCACT | 43  |
| CCGCAGA | 22  |
| CCGCAGC | 58  |
| CCGCAGG | 47  |
| CCGCAGT | 29  |
| CCGCATA | 22  |
| CCGCATC | 43  |
| CCGCATG | 29  |
| CCGCATT | 14  |
| CCGCCAA | 47  |
| CCGCCAC | 69  |
| CCGCCAG | 58  |
| CCGCCAT | 54  |
| CCGCCCA | 54  |
| CCGCCCC | 115 |

|         |     |
|---------|-----|
| CCGCCCG | 126 |
| CCGCCCT | 83  |
| CCGCCGA | 47  |
| CCGCCGC | 155 |
| CCGCCGG | 61  |
| CCGCCGT | 76  |
| CCGCCTA | 11  |
| CCGCCTC | 65  |
| CCGCCTG | 47  |
| CCGCCTT | 29  |
| CCGCGAA | 25  |
| CCGCGAC | 58  |
| CCGCGAG | 32  |
| CCGCGAT | 25  |
| CCGCGCA | 51  |
| CCGCGCC | 97  |
| CCGCGCG | 123 |
| CCGCGCT | 51  |
| CCGCGGA | 22  |
| CCGCGGC | 72  |
| CCGCGGG | 36  |
| CCGCGGT | 11  |
| CCGCGTA | 11  |
| CCGCGTC | 61  |
| CCGCGTG | 51  |
| CCGCGTT | 22  |
| CCGCTAA | 18  |
| CCGCTAA | 18  |
| CCGCTAC | 40  |
| CCGCTAT | 18  |
| CCGCTCA | 18  |
| CCGCTCC | 87  |
| CCGCTCG | 54  |
| CCGCTCT | 36  |
| CCGCTGA | 43  |
| CCGCTGC | 83  |
| CCGCTGG | 18  |
| CCGCTGT | 22  |
| CCGCTTA | 29  |
| CCGCTTC | 54  |
| CCGCTTG | 32  |
| CCGCTTT | 40  |
| CCGAAA  | 25  |
| CCGGAAC | 51  |
| CCGGAAG | 22  |
| CCGGAAT | 29  |
| CCGGACA | 126 |
| CCGGACC | 40  |
| CCGGACG | 83  |
| CCGGACT | 76  |
| CCGGAGA | 18  |
| CCGGAGC | 43  |

|         |     |
|---------|-----|
| CCGGAGG | 36  |
| CCGGAGT | 11  |
| CCGGATA | 32  |
| CCGGATC | 32  |
| CCGGATG | 36  |
| CCGGATT | 47  |
| CCGGCAA | 22  |
| CCGGCAC | 25  |
| CCGGCAG | 25  |
| CCGGCAT | 47  |
| CCGGCCA | 72  |
| CCGGCCC | 119 |
| CCGGCCG | 119 |
| CCGGCCT | 43  |
| CCGGCGA | 18  |
| CCGGCGC | 72  |
| CCGGCGG | 72  |
| CCGGCGT | 47  |
| CCGGCTA | 32  |
| CCGGCTC | 87  |
| CCGGCTG | 47  |
| CCGGCTT | 65  |
| CCGGGAA | 22  |
| CCGGGAC | 18  |
| CCGGGAG | 32  |
| CCGGGAT | 22  |
| CCGGGCA | 22  |
| CCGGGCC | 72  |
| CCGGGCG | 22  |
| CCGGGCT | 40  |
| CCGGGGA | 36  |
| CCGGGGC | 36  |
| CCGGGGG | 43  |
| CCGGGGT | 40  |
| CCGGGTA | 4   |
| CCGGGTC | 54  |
| CCGGGTG | 58  |
| CCGGGTT | 36  |
| CCGGTAA | 32  |
| CCGGTAC | 29  |
| CCGGTAG | 29  |
| CCGGTAT | 36  |
| CCGGTCA | 40  |
| CCGGTCC | 43  |
| CCGGTCG | 51  |
| CCGGTCT | 43  |
| CCGGTGA | 54  |
| CCGGTGC | 90  |
| CCGGTGG | 108 |
| CCGGTGT | 76  |
| CCGGTTA | 22  |
| CCGGTTC | 58  |



|            |    |
|------------|----|
| CCGGTTG    | 40 |
| CCGGTTT    | 72 |
| CCGTAAA    | 25 |
| CCGTAAC    | 22 |
| CCGTAAG    | 22 |
| CCGTAAT    | 18 |
| CCGTACA    | 25 |
| CCGTACC    | 25 |
| CCGTACG    | 47 |
| CCGTACTION | 29 |
| CCGTAGA    | 25 |
| CCGTAGC    | 22 |
| CCGTAGG    | 18 |
| CCGTAGT    | 18 |
| CCGTATA    | 29 |
| CCGTATC    | 29 |
| CCGTATG    | 7  |
| CCGTATT    | 25 |
| CCGTCAA    | 22 |
| CCGTCCAC   | 43 |
| CCGTCCAG   | 25 |
| CCGTCCAT   | 18 |
| CCGTCCA    | 61 |
| CCGTCCC    | 72 |
| CCGTCCG    | 90 |
| CCGTCCCT   | 72 |
| CCGTCCGA   | 40 |
| CCGTCCGC   | 58 |
| CCGTCCGG   | 36 |
| CCGTCCGT   | 58 |
| CCGTCTA    | 11 |
| CCGTCTC    | 58 |
| CCGTCTG    | 32 |
| CCGTCTT    | 79 |
| CCGTGAA    | 36 |
| CCGTGAC    | 40 |
| CCGTGAG    | 22 |
| CCGTGAT    | 25 |
| CCGTGCA    | 79 |
| CCGTGCC    | 79 |
| CCGTGCG    | 47 |
| CCGTGCT    | 32 |
| CCGTGGA    | 36 |
| CCGTGGC    | 76 |
| CCGTGGG    | 32 |
| CCGTGGT    | 36 |
| CCGTGTA    | 25 |
| CCGTGTC    | 54 |
| CCGTGTG    | 51 |
| CCGTGTT    | 36 |
| CCGTTAA    | 40 |
| CCGTTAC    | 36 |

|          |     |
|----------|-----|
| CCGTTAG  | 36  |
| CCGTTAT  | 11  |
| CCGTTCA  | 36  |
| CCGTTCC  | 58  |
| CCGTTCCG | 54  |
| CCGTTCT  | 29  |
| CCGTTGA  | 40  |
| CCGTTGA  | 40  |
| CCGTTGG  | 101 |
| CCGTTGT  | 47  |
| CCGTTTA  | 29  |
| CCGTTTC  | 22  |
| CCGTTTG  | 83  |
| CCGTTTT  | 79  |
| CCTAAAA  | 79  |
| CCTAAAC  | 69  |
| CCTAAAG  | 32  |
| CCTAAAT  | 76  |
| CCTAACA  | 29  |
| CCTAACC  | 69  |
| CCTAACG  | 29  |
| CCTAACT  | 43  |
| CCTAAGA  | 58  |
| CCTAAGC  | 47  |
| CCTAAGG  | 58  |
| CCTAAGT  | 25  |
| CCTAATA  | 76  |
| CCTAATC  | 51  |
| CCTAATG  | 36  |
| CCTAATT  | 65  |
| CCTACAA  | 61  |
| CCTACAC  | 51  |
| CCTACAG  | 47  |
| CCTACAT  | 32  |
| CCTACCA  | 76  |
| CCTACCC  | 25  |
| CCTACCG  | 32  |
| CCTACCT  | 32  |
| CCTACGA  | 18  |
| CCTACGC  | 29  |
| CCTACGG  | 14  |
| CCTACGT  | 32  |
| CCTACTA  | 58  |
| CCTACTC  | 58  |
| CCTACTG  | 32  |
| CCTACTT  | 69  |
| CCTAGAA  | 58  |
| CCTAGAC  | 69  |
| CCTAGAG  | 61  |
| CCTAGAT  | 40  |
| CCTAGCA  | 51  |
| CCTAGCC  | 61  |

|         |     |
|---------|-----|
| CCTAGCG | 22  |
| CCTAGCT | 90  |
| CCTAGGA | 43  |
| CCTAGGC | 65  |
| CCTAGGG | 29  |
| CCTAGGT | 43  |
| CCTAGTA | 32  |
| CCTAGTA | 32  |
| CCTAGTC | 29  |
| CCTAGTT | 43  |
| CCTATAA | 97  |
| CCTATAC | 22  |
| CCTATAG | 32  |
| CCTATAT | 119 |
| CCTATCA | 72  |
| CCTATCC | 36  |
| CCTATCG | 18  |
| CCTATCT | 54  |
| CCTATGA | 61  |
| CCTATGC | 51  |
| CCTATGG | 54  |
| CCTATGT | 54  |
| CCTATTA | 61  |
| CCTATTC | 76  |
| CCTATTG | 40  |
| CCTATTT | 126 |
| CCTCAAA | 94  |
| CCTCAAC | 87  |
| CCTCAAG | 43  |
| CCTCAAT | 79  |
| CCTCACA | 65  |
| CCTCACC | 76  |
| CCTCACG | 58  |
| CCTCACT | 79  |
| CCTCAGA | 32  |
| CCTCAGC | 54  |
| CCTCAGG | 40  |
| CCTCAGT | 14  |
| CCTCATA | 40  |
| CCTCATC | 97  |
| CCTCATG | 47  |
| CCTCATT | 76  |
| CCTCCAA | 105 |
| CCTCCAC | 105 |
| CCTCCAG | 61  |
| CCTCCAT | 79  |
| CCTCCCA | 97  |
| CCTCCCC | 144 |
| CCTCCCG | 47  |
| CCTCCCT | 101 |
| CCTCCGA | 40  |
| CCTCCGC | 58  |

|         |     |
|---------|-----|
| CCTCCGG | 69  |
| CCTCCGT | 65  |
| CCTCCTA | 54  |
| CCTCCTC | 292 |
| CCTCCTG | 69  |
| CCTCCTT | 90  |
| CCTCGAA | 36  |
| CCTCGAC | 43  |
| CCTCGAG | 22  |
| CCTCGAT | 25  |
| CCTCGCA | 40  |
| CCTCGCC | 105 |
| CCTCGCG | 65  |
| CCTCGCT | 54  |
| CCTCGGA | 40  |
| CCTCGGC | 47  |
| CCTCGGG | 40  |
| CCTCGGT | 29  |
| CCTCGTA | 22  |
| CCTCGTC | 83  |
| CCTCGTG | 43  |
| CCTCGTT | 25  |
| CCTCTAA | 61  |
| CCTCTAC | 43  |
| CCTCTAG | 101 |
| CCTCTAT | 43  |
| CCTCTCA | 65  |
| CCTCTCC | 202 |
| CCTCTCG | 58  |
| CCTCTCT | 191 |
| CCTCTGA | 22  |
| CCTCTGC | 94  |
| CCTCTGG | 22  |
| CCTCTGT | 36  |
| CCTCTTA | 22  |
| CCTCTTC | 115 |
| CCTCTTG | 130 |
| CCTCTTT | 119 |
| CCTGAAA | 58  |
| CCTGAAC | 40  |
| CCTGAAG | 43  |
| CCTGAAT | 51  |
| CCTGACA | 18  |
| CCTGACC | 40  |
| CCTGACG | 32  |
| CCTGACT | 43  |
| CCTGAGA | 43  |
| CCTGAGC | 32  |
| CCTGAGG | 36  |
| CCTGAGT | 25  |
| CCTGATA | 25  |
| CCTGATC | 43  |

|          |     |
|----------|-----|
| CCTGATG  | 58  |
| CCTGATT  | 29  |
| CCTGCAA  | 61  |
| CCTGCAC  | 79  |
| CCTGCAG  | 72  |
| CCTGCAT  | 43  |
| CCTGCCA  | 32  |
| CCTGCCC  | 108 |
| CCTGCCG  | 51  |
| CCTGCCT  | 83  |
| CCTGCGA  | 29  |
| CCTGCGC  | 61  |
| CCTGCGG  | 40  |
| CCTGCGT  | 40  |
| CCTGCTA  | 54  |
| CCTGCTC  | 79  |
| CCTGCTG  | 79  |
| CCTGCTT  | 69  |
| CCTGGAA  | 29  |
| CCTGGAC  | 54  |
| CCTGGAG  | 22  |
| CCTGGAT  | 43  |
| CCTGGCA  | 58  |
| CCTGGCC  | 29  |
| CCTGGCG  | 58  |
| CCTGGCT  | 32  |
| CCTGGGA  | 14  |
| CCTGGGC  | 32  |
| CCTGGGG  | 51  |
| CCTGGGT  | 61  |
| CCTGGTA  | 14  |
| CCTGGTC  | 65  |
| CCTGGTG  | 36  |
| CCTGGTT  | 43  |
| CCTGTAA  | 36  |
| CCTGTAC  | 40  |
| CCTGTAG  | 76  |
| CCTGTAT  | 40  |
| CCTGTCA  | 36  |
| CCTGTCC  | 58  |
| CCTGTCCG | 58  |
| CCTGTCT  | 25  |
| CCTGTGA  | 43  |
| CCTGTGC  | 65  |
| CCTGTGG  | 54  |
| CCTGTGT  | 43  |
| CCTGTTA  | 22  |
| CCTGTTC  | 61  |
| CCTGTTG  | 32  |
| CCTGTTT  | 97  |
| CCTTAAA  | 65  |
| CCTTAAC  | 36  |

|         |     |
|---------|-----|
| CCTTAAG | 25  |
| CCTTAAT | 43  |
| CCTTACA | 40  |
| CCTTACA | 40  |
| CCTTACG | 7   |
| CCTTACT | 29  |
| CCTTAGA | 25  |
| CCTTAGC | 54  |
| CCTTAGG | 43  |
| CCTTAGT | 47  |
| CCTTATA | 51  |
| CCTTATC | 51  |
| CCTTATG | 47  |
| CCTTATT | 83  |
| CCTTCAA | 61  |
| CCTTCAC | 61  |
| CCTTCAG | 54  |
| CCTTCAT | 94  |
| CCTTCCA | 72  |
| CCTTCCC | 119 |
| CCTTCCG | 32  |
| CCTTCCT | 105 |
| CCTTCGA | 65  |
| CCTTCGC | 47  |
| CCTTCGG | 54  |
| CCTTCGT | 105 |
| CCTTCTA | 40  |
| CCTTCTC | 65  |
| CCTTCTG | 65  |
| CCTTCTT | 141 |
| CCTTGAA | 51  |
| CCTTGAC | 43  |
| CCTTGAG | 47  |
| CCTTGAT | 79  |
| CCTTGCA | 76  |
| CCTTGCC | 61  |
| CCTTGCG | 58  |
| CCTTGCT | 87  |
| CCTTGGA | 65  |
| CCTTGGC | 76  |
| CCTTGGG | 69  |
| CCTTGGT | 47  |
| CCTTGTA | 72  |
| CCTTGTC | 58  |
| CCTTGTG | 79  |
| CCTTGTT | 76  |
| CCTTTAA | 76  |
| CCTTTAC | 40  |
| CCTTTAG | 51  |
| CCTTTAT | 69  |
| CCTTTCA | 94  |
| CCTTTCC | 105 |

|         |     |
|---------|-----|
| CCTTTCG | 65  |
| CCTTCT  | 94  |
| CCTTTGA | 76  |
| CCTTTGC | 108 |
| CCTTTGG | 90  |
| CCTTTGT | 123 |
| CCTTTTA | 65  |
| CCTTTTC | 144 |
| CCTTTTG | 112 |
| CCTTTTT | 166 |
| CGAAAAA | 69  |
| CGAAAAC | 72  |
| CGAAAAG | 40  |
| CGAAAAT | 72  |
| CGAAACA | 65  |
| CGAAACC | 69  |
| CGAAACG | 47  |
| CGAAACT | 47  |
| CGAAAGA | 61  |
| CGAAAGC | 54  |
| CGAAAGG | 29  |
| CGAAAGT | 32  |
| CGAAATA | 36  |
| CGAAATC | 22  |
| CGAAATG | 51  |
| CGAAATT | 47  |
| CGAACAA | 65  |
| CGAACAC | 29  |
| CGAACAG | 43  |
| CGAACAT | 22  |
| CGAACCA | 79  |
| CGAACCC | 22  |
| CGAACCG | 51  |
| CGAACCT | 40  |
| CGAACGA | 40  |
| CGAACGC | 32  |
| CGAACGG | 29  |
| CGAACGT | 11  |
| CGAACTA | 11  |
| CGAACTC | 47  |
| CGAACTG | 47  |
| CGAACTT | 29  |
| CGAAGAA | 51  |
| CGAAGAC | 25  |
| CGAAGAG | 65  |
| CGAAGAT | 58  |
| CGAAGCA | 43  |
| CGAAGCC | 51  |
| CGAAGCG | 36  |
| CGAAGCT | 47  |
| CGAAGGA | 32  |
| CGAAGGA | 32  |

|         |    |
|---------|----|
| CGAAGGG | 43 |
| CGAAGGT | 29 |
| CGAAGTA | 14 |
| CGAAGTC | 18 |
| CGAAGTG | 29 |
| CGAAGTT | 29 |
| CGAATAA | 40 |
| CGAATAC | 25 |
| CGAATAG | 29 |
| CGAATAT | 29 |
| CGAATCA | 32 |
| CGAATCC | 25 |
| CGAATCG | 4  |
| CGAATCT | 18 |
| CGAATGA | 32 |
| CGAATGC | 14 |
| CGAATGG | 14 |
| CGAATGT | 36 |
| CGAATTA | 32 |
| CGAATTC | 29 |
| CGAATTG | 43 |
| CGAATTT | 36 |
| CGACAAA | 90 |
| CGACAAC | 51 |
| CGACAAG | 90 |
| CGACAAT | 40 |
| CGACACA | 32 |
| CGACACC | 32 |
| CGACACG | 65 |
| CGACACT | 18 |
| CGACAGA | 32 |
| CGACAGC | 58 |
| CGACAGG | 36 |
| CGACAGT | 22 |
| CGACATA | 32 |
| CGACATC | 43 |
| CGACATG | 32 |
| CGACATT | 29 |
| CGACCAA | 43 |
| CGACCAC | 25 |
| CGACCAG | 36 |
| CGACCAT | 43 |
| CGACCCA | 51 |
| CGACCCC | 18 |
| CGACCCG | 61 |
| CGACCCT | 25 |
| CGACCGA | 58 |
| CGACCGC | 43 |
| CGACCGG | 54 |
| CGACCGT | 72 |
| CGACCTA | 51 |
| CGACCTC | 43 |



|         |    |
|---------|----|
| CGACCTG | 32 |
| CGACCTT | 40 |
| CGACGAA | 72 |
| CGACGAC | 90 |
| CGACGAG | 61 |
| CGACGAT | 43 |
| CGACGCA | 36 |
| CGACGCC | 36 |
| CGACGCG | 47 |
| CGACGCT | 40 |
| CGACGGA | 58 |
| CGACGGC | 65 |
| CGACGGG | 47 |
| CGACGGT | 40 |
| CGACGTA | 29 |
| CGACGTC | 36 |
| CGACGTG | 32 |
| CGACGTT | 32 |
| CGACTAA | 29 |
| CGACTAC | 29 |
| CGACTAG | 22 |
| CGACTAT | 29 |
| CGACTCA | 40 |
| CGACTCC | 32 |
| CGACTCG | 40 |
| CGACTCT | 51 |
| CGACTGA | 29 |
| CGACTGC | 43 |
| CGACTGG | 7  |
| CGACTGT | 43 |
| CGACTTA | 43 |
| CGACTTC | 32 |
| CGACTTG | 58 |
| CGACTTT | 32 |
| CGAGAAA | 83 |
| CGAGAAC | 43 |
| CGAGAAG | 43 |
| CGAGAAT | 32 |
| CGAGACA | 36 |
| CGAGACC | 29 |
| CGAGACG | 47 |
| CGAGACT | 29 |
| CGAGAGA | 79 |
| CGAGAGC | 43 |
| CGAGAGG | 51 |
| CGAGAGT | 32 |
| CGAGATA | 29 |
| CGAGATA | 29 |
| CGAGATC | 51 |
| CGAGATG | 51 |
| CGAGCAA | 54 |
| CGAGCAC | 54 |

|         |    |
|---------|----|
| CGAGCAG | 32 |
| CGAGCAT | 32 |
| CGAGCCA | 90 |
| CGAGCCC | 69 |
| CGAGCCG | 61 |
| CGAGCCT | 40 |
| CGAGCGA | 58 |
| CGAGCGC | 47 |
| CGAGCGG | 40 |
| CGAGCGT | 22 |
| CGAGCTA | 51 |
| CGAGCTC | 65 |
| CGAGCTG | 54 |
| CGAGCTT | 58 |
| CGAGGAA | 43 |
| CGAGGAC | 14 |
| CGAGGAG | 69 |
| CGAGGAT | 29 |
| CGAGGCA | 58 |
| CGAGGCC | 47 |
| CGAGGCG | 51 |
| CGAGGCT | 36 |
| CGAGGGA | 47 |
| CGAGGGC | 51 |
| CGAGGGG | 43 |
| CGAGGGT | 25 |
| CGAGGTA | 11 |
| CGAGGTC | 43 |
| CGAGGTG | 32 |
| CGAGGTT | 29 |
| CGAGTAA | 36 |
| CGAGTAC | 40 |
| CGAGTAG | 36 |
| CGAGTAT | 36 |
| CGAGTCA | 25 |
| CGAGTCC | 65 |
| CGAGTCG | 29 |
| CGAGTCT | 25 |
| CGAGTGA | 40 |
| CGAGTGC | 58 |
| CGAGTGG | 43 |
| CGAGTGT | 58 |
| CGAGTTA | 11 |
| CGAGTTC | 29 |
| CGAGTTG | 61 |
| CGAGTTT | 51 |
| CGATAAA | 47 |
| CGATAAC | 22 |
| CGATAAG | 18 |
| CGATAAT | 22 |
| CGATACA | 58 |
| CGATACC | 18 |

|         |     |
|---------|-----|
| CGATACG | 14  |
| CGATACT | 11  |
| CGATAGA | 11  |
| CGATAGC | 14  |
| CGATAGG | 25  |
| CGATAGT | 14  |
| CGATATA | 36  |
| CGATATC | 32  |
| CGATATG | 36  |
| CGATATT | 47  |
| CGATCAA | 36  |
| CGATCAC | 29  |
| CGATCAG | 36  |
| CGATCAT | 29  |
| CGATCCA | 108 |
| CGATCCC | 36  |
| CGATCCG | 69  |
| CGATCCT | 54  |
| CGATCGA | 112 |
| CGATCGC | 14  |
| CGATCGG | 36  |
| CGATCGT | 36  |
| CGATCTA | 36  |
| CGATCTC | 65  |
| CGATCTG | 43  |
| CGATCTT | 79  |
| CGATGAA | 51  |
| CGATGAC | 43  |
| CGATGAG | 61  |
| CGATGAT | 43  |
| CGATGCA | 40  |
| CGATGCC | 29  |
| CGATGCG | 40  |
| CGATGCT | 22  |
| CGATGGA | 40  |
| CGATGGC | 18  |
| CGATGGG | 51  |
| CGATGGT | 40  |
| CGATGTA | 43  |
| CGATGTC | 18  |
| CGATGTG | 22  |
| CGATGTT | 25  |
| CGATTAA | 36  |
| CGATTAC | 18  |
| CGATTAG | 36  |
| CGATTAT | 47  |
| CGATTCA | 32  |
| CGATTCC | 22  |
| CGATTCG | 25  |
| CGATTCT | 36  |
| CGATTGA | 32  |
| CGATTGC | 32  |

|          |    |
|----------|----|
| CGATTGG  | 29 |
| CGATTGT  | 29 |
| CGATTTA  | 40 |
| CGATTTTC | 22 |
| CGATTTG  | 65 |
| CGATTTT  | 65 |
| CGCAAAA  | 72 |
| CGCAAAC  | 36 |
| CGCAAAG  | 25 |
| CGCAAAT  | 32 |
| CGCAACA  | 43 |
| CGCAACC  | 51 |
| CGCAACG  | 51 |
| CGCAACT  | 14 |
| CGCAAGA  | 25 |
| CGCAAGC  | 32 |
| CGCAAGG  | 40 |
| CGCAAGT  | 40 |
| CGCAATA  | 18 |
| CGCAATC  | 29 |
| CGCAATG  | 32 |
| CGCAATT  | 18 |
| CGCACAA  | 36 |
| CGCACAC  | 40 |
| CGCACAG  | 14 |
| CGCACAT  | 14 |
| CGCACCA  | 29 |
| CGCACCA  | 29 |
| CGCACCC  | 61 |
| CGCACCT  | 22 |
| CGCACGA  | 22 |
| CGCACGC  | 54 |
| CGCACGG  | 61 |
| CGCACGT  | 79 |
| CGCACTA  | 22 |
| CGCACTC  | 29 |
| CGCACTG  | 22 |
| CGCACTT  | 22 |
| CGCAGAA  | 18 |
| CGCAGAC  | 43 |
| CGCAGAG  | 58 |
| CGCAGAT  | 22 |
| CGCAGCA  | 58 |
| CGCAGCC  | 51 |
| CGCAGCG  | 36 |
| CGCAGCT  | 36 |
| CGCAGGA  | 51 |
| CGCAGGC  | 32 |
| CGCAGGG  | 29 |
| CGCAGGT  | 29 |
| CGCAGTA  | 14 |
| CGCAGTC  | 22 |

|          |     |
|----------|-----|
| CGCAGTG  | 22  |
| CGCAGTT  | 22  |
| CGCATAA  | 11  |
| CGCATAC  | 4   |
| CGCATAG  | 14  |
| CGCATAT  | 54  |
| CGCATCA  | 40  |
| CGCATCC  | 51  |
| CGCATCG  | 22  |
| CGCATCT  | 40  |
| CGCATGA  | 29  |
| CGCATGC  | 90  |
| CGCATGG  | 36  |
| CGCATGT  | 40  |
| CGCATT A | 25  |
| CGCATT C | 18  |
| CGCATT G | 29  |
| CGCATT T | 47  |
| CGCCAAA  | 76  |
| CGCCAAC  | 61  |
| CGCCAAG  | 51  |
| CGCCAAT  | 36  |
| CGCCACA  | 32  |
| CGCCACC  | 101 |
| CGCCACG  | 47  |
| CGCCACT  | 58  |
| CGCCAGA  | 22  |
| CGCCAGC  | 69  |
| CGCCAGG  | 58  |
| CGCCAGT  | 25  |
| CGCCATA  | 29  |
| CGCCATC  | 76  |
| CGCCATG  | 51  |
| CGCCATT  | 54  |
| CGCCCAA  | 32  |
| CGCCCAC  | 83  |
| CGCCCAG  | 40  |
| CGCCCAT  | 25  |
| CGCCCCA  | 79  |
| CGCCCCC  | 105 |
| CGCCCCG  | 47  |
| CGCCCCT  | 72  |
| CGCCCGA  | 40  |
| CGCCCGC  | 123 |
| CGCCCGG  | 58  |
| CGCCCGT  | 43  |
| CGCCCTA  | 36  |
| CGCCCTA  | 36  |
| CGCCCTG  | 51  |
| CGCCCTT  | 40  |
| CGCCGAA  | 54  |
| CGCCGAC  | 40  |

|         |     |
|---------|-----|
| CGCCGAG | 36  |
| CGCCGAT | 54  |
| CGCCGCA | 61  |
| CGCCGCC | 144 |
| CGCCGCG | 65  |
| CGCCGCT | 72  |
| CGCCGGA | 43  |
| CGCCGGC | 87  |
| CGCCGGG | 18  |
| CGCCGGT | 47  |
| CGCCGTA | 18  |
| CGCCGTC | 87  |
| CGCCGTG | 32  |
| CGCCGTT | 61  |
| CGCCTAA | 11  |
| CGCCTAC | 18  |
| CGCCTAG | 29  |
| CGCCTAT | 25  |
| CGCCTCA | 54  |
| CGCCTCC | 87  |
| CGCCTCG | 43  |
| CGCCTCT | 58  |
| CGCCTGA | 29  |
| CGCCTGC | 87  |
| CGCCTGG | 51  |
| CGCCTGT | 36  |
| CGCCTTA | 7   |
| CGCCTTC | 29  |
| CGCCTTG | 43  |
| CGCCTTT | 40  |
| CGCGAAA | 29  |
| CGCGAAC | 14  |
| CGCGAAG | 22  |
| CGCGAAT | 18  |
| CGCGACA | 25  |
| CGCGACC | 54  |
| CGCGACG | 51  |
| CGCGACT | 22  |
| CGCGAGA | 40  |
| CGCGAGC | 47  |
| CGCGAGG | 29  |
| CGCGAGT | 14  |
| CGCGATA | 7   |
| CGCGATC | 32  |
| CGCGATG | 40  |
| CGCGATT | 11  |
| CGCGCAA | 40  |
| CGCGCAC | 61  |
| CGCGCAG | 29  |
| CGCGCAT | 43  |
| CGCGCCA | 72  |
| CGCGCCC | 83  |

|                |     |
|----------------|-----|
| CGCGCCG        | 72  |
| CGCGCCT        | 72  |
| CGCGCGA        | 69  |
| CGCGCGC        | 234 |
| CGCGCGG        | 76  |
| CGCGCGT        | 51  |
| CGCGCTA        | 36  |
| CGCGCTC        | 58  |
| CGCGCTG        | 36  |
| CGCGCTT        | 36  |
| CGCGGAA        | 18  |
| CGCGGAA        | 18  |
| CGCGGAC        | 72  |
| CGCGGAG        | 32  |
| <b>cgcggat</b> | 61  |
| CGCGGCA        | 54  |
| CGCGGCC        | 72  |
| CGCGGCG        | 36  |
| CGCGGCT        | 32  |
| CGCGGGA        | 29  |
| CGCGGGC        | 61  |
| CGCGGGG        | 36  |
| CGCGGGT        | 25  |
| CGCGGTA        | 0   |
| CGCGGTC        | 14  |
| CGCGGTG        | 25  |
| CGCGGTT        | 32  |
| CGCGTAA        | 7   |
| CGCGTAC        | 25  |
| CGCGTAG        | 4   |
| CGCGTAT        | 11  |
| CGCGTCA        | 25  |
| CGCGTCC        | 51  |
| CGCGTOG        | 94  |
| CGCGTCT        | 40  |
| CGCGTGA        | 32  |
| CGCGTGC        | 87  |
| CGCGTGG        | 36  |
| CGCGTGT        | 43  |
| CGCGTTA        | 14  |
| CGCGTTC        | 18  |
| CGCGTTG        | 25  |
| CGCGTTT        | 18  |
| CGCTAAA        | 29  |
| CGCTAAC        | 47  |
| CGCTAAG        | 7   |
| CGCTAAT        | 7   |
| CGCTACA        | 22  |
| CGCTACC        | 22  |
| CGCTACG        | 25  |
| CGCTACT        | 40  |
| CGCTAGA        | 22  |

|         |    |
|---------|----|
| CGCTAGC | 83 |
| CGCTAGG | 11 |
| CGCTAGT | 29 |
| CGCTATA | 32 |
| CGCTATC | 14 |
| CGCTATG | 18 |
| CGCTATT | 36 |
| CGCTCAA | 40 |
| CGCTCAC | 25 |
| CGCTCAG | 22 |
| CGCTCAT | 11 |
| CGCTCCA | 54 |
| CGCTCCC | 76 |
| CGCTCCG | 43 |
| CGCTCCT | 72 |
| CGCTCGA | 29 |
| CGCTCGC | 72 |
| CGCTCGG | 47 |
| CGCTCGT | 29 |
| CGCTCTA | 22 |
| CGCTCTC | 65 |
| CGCTCTG | 29 |
| CGCTCTT | 22 |
| CGCTGAA | 22 |
| CGCTGAC | 25 |
| CGCTGAG | 32 |
| CGCTGAT | 25 |
| CGCTGCA | 25 |
| CGCTGCC | 69 |
| CGCTGCG | 32 |
| CGCTGCT | 47 |
| CGCTGGA | 47 |
| CGCTGGC | 43 |
| CGCTGGG | 29 |
| CGCTGGT | 47 |
| CGCTGTA | 14 |
| CGCTGTC | 36 |
| CGCTGTG | 43 |
| CGCTGTT | 43 |
| CGCTTAA | 11 |
| CGCTTAC | 18 |
| CGCTTAG | 32 |
| CGCTTAT | 36 |
| CGCTTCA | 29 |
| CGCTTCC | 76 |
| CGCTTCG | 25 |
| CGCTTCT | 51 |
| CGCTTGA | 40 |
| CGCTTGC | 36 |
| CGCTTGG | 47 |
| CGCTTGT | 43 |
| CGCTTTA | 18 |



|         |     |
|---------|-----|
| CGCTTTC | 40  |
| CGCTTTG | 18  |
| CGCTTTT | 58  |
| CGGAAAA | 51  |
| CGGAAAC | 29  |
| CGGAAAG | 32  |
| CGGAAAT | 18  |
| CGGAACA | 22  |
| CGGAACC | 43  |
| CGGAACG | 22  |
| CGGAACT | 11  |
| CGGAAGA | 29  |
| CGGAAGC | 36  |
| CGGAAGG | 32  |
| CGGAAGT | 11  |
| CGGAATA | 32  |
| CGGAATC | 32  |
| CGGAATG | 11  |
| CGGAATT | 11  |
| CGGACAA | 43  |
| CGGACAC | 58  |
| CGGACAG | 108 |
| CGGACAT | 18  |
| CGGACCA | 22  |
| CGGACCA | 22  |
| CGGACCC | 36  |
| CGGACCG | 54  |
| CGGACGA | 40  |
| CGGACGC | 36  |
| CGGACGG | 177 |
| CGGACGT | 14  |
| CGGACTA | 14  |
| CGGACTC | 36  |
| CGGACTG | 94  |
| CGGACTT | 14  |
| CGGAGAA | 29  |
| CGGAGAC | 32  |
| CGGAGAG | 54  |
| CGGAGAT | 25  |
| CGGAGCA | 58  |
| CGGAGCC | 61  |
| CGGAGCG | 51  |
| CGGAGCT | 58  |
| CGGAGGA | 87  |
| CGGAGGC | 40  |
| CGGAGGG | 54  |
| CGGAGGT | 43  |
| CGGAGTA | 14  |
| CGGAGTC | 25  |
| CGGAGTG | 29  |
| CGGAGTT | 36  |
| CGGATAA | 25  |

|         |    |
|---------|----|
| CGGATAC | 29 |
| CGGATAG | 22 |
| CGGATAT | 40 |
| CGGATCA | 51 |
| CGGATCC | 40 |
| CGGATCG | 32 |
| CGGATCT | 43 |
| CGGATGA | 32 |
| CGGATGC | 32 |
| CGGATGG | 69 |
| CGGATGT | 29 |
| CGGATTA | 32 |
| CGGATTC | 36 |
| CGGATTG | 29 |
| CGGATTT | 61 |
| CGGCAAA | 76 |
| CGGCAAC | 40 |
| CGGCAAG | 25 |
| CGGCAAT | 47 |
| CGGCACA | 40 |
| CGGCACC | 47 |
| CGGCACG | 47 |
| CGGCACT | 32 |
| CGGCAGA | 25 |
| CGGCAGC | 54 |
| CGGCAGG | 40 |
| CGGCAGT | 40 |
| CGGCATA | 29 |
| CGGCATC | 47 |
| CGGCATG | 36 |
| CGGCATT | 18 |
| CGGCCAA | 47 |
| CGGCCAC | 90 |
| CGGCCAG | 58 |
| CGGCCAT | 58 |
| CGGCCCA | 97 |
| CGGCCCC | 51 |
| CGGCCCG | 79 |
| CGGCCCT | 47 |
| CGGCCGA | 32 |
| CGGCCGC | 90 |
| CGGCCGG | 94 |
| CGGCCGT | 72 |
| CGGCCTA | 25 |
| CGGCCTA | 25 |
| CGGCCTC | 32 |
| CGGCCTT | 54 |
| CGGCGAA | 36 |
| CGGCGAC | 40 |
| CGGCGAG | 22 |
| CGGCGAT | 36 |
| CGGCGCA | 25 |

|         |     |
|---------|-----|
| CGGCGCC | 76  |
| CGGCGCG | 43  |
| CGGCGCT | 32  |
| CGGCGGA | 51  |
| CGGCGGC | 76  |
| CGGCGGG | 40  |
| CGGCGGT | 51  |
| CGGCGTA | 29  |
| CGGCGTC | 72  |
| CGGCGTG | 43  |
| CGGCGTT | 25  |
| CGGCTAA | 22  |
| CGGCTAC | 40  |
| CGGCTAG | 47  |
| CGGCTAT | 65  |
| CGGCTCA | 83  |
| CGGCTCC | 69  |
| CGGCTCG | 51  |
| CGGCTCT | 40  |
| CGGCTGA | 22  |
| CGGCTGC | 101 |
| CGGCTGG | 14  |
| CGGCTGT | 54  |
| CGGCTTA | 18  |
| CGGCTTC | 51  |
| CGGCTTG | 47  |
| CGGCTTT | 58  |
| CGGAAA  | 32  |
| CGGAAAC | 22  |
| CGGAAAG | 11  |
| CGGAAAT | 18  |
| CGGACA  | 40  |
| CGGACC  | 18  |
| CGGACG  | 22  |
| CGGACT  | 18  |
| CGGAGA  | 43  |
| CGGAGC  | 22  |
| CGGAGG  | 32  |
| CGGAGT  | 14  |
| CGGATA  | 29  |
| CGGATC  | 18  |
| CGGATG  | 14  |
| CGGATT  | 43  |
| CGGCAA  | 11  |
| CGGCAC  | 51  |
| CGGCAG  | 40  |
| CGGCAT  | 22  |
| CGGCCA  | 72  |
| CGGCCCC | 90  |
| CGGCCCG | 69  |
| CGGCCT  | 36  |
| CGGCCGA | 43  |

|          |    |
|----------|----|
| CGGGCGC  | 29 |
| CGGGCGG  | 72 |
| CGGGCGT  | 22 |
| CGGGCTA  | 43 |
| CGGGCTC  | 43 |
| CGGGCTG  | 54 |
| CGGGCTT  | 43 |
| CGGGGAA  | 36 |
| CGGGGAC  | 32 |
| CGGGGAG  | 40 |
| CGGGGAT  | 25 |
| CGGGGCA  | 18 |
| CGGGGCC  | 32 |
| CGGGGCG  | 32 |
| CGGGGCT  | 32 |
| CGGGGGA  | 25 |
| CGGGGGC  | 25 |
| CGGGGGG  | 47 |
| CGGGGGT  | 36 |
| CGGGGTA  | 43 |
| CGGGGTC  | 40 |
| CGGGGTG  | 54 |
| CGGGGTT  | 22 |
| CGGGTAA  | 14 |
| CGGGTAC  | 22 |
| CGGGTAG  | 7  |
| CGGGTAT  | 22 |
| CGGGTCA  | 29 |
| CGGGTCC  | 14 |
| CGGGTCG  | 32 |
| CGGGTCT  | 40 |
| CGGGTGA  | 43 |
| CGGGTGC  | 43 |
| CGGGTGG  | 40 |
| CGGGTGT  | 61 |
| CGGGTTA  | 36 |
| CGGGTTG  | 29 |
| CGGGTTT  | 51 |
| CGGTAAA  | 43 |
| CGGTAAAC | 25 |
| CGGTAAAG | 14 |
| CGGTAAAT | 18 |
| CGGTACA  | 32 |
| CGGTACC  | 43 |
| CGGTACG  | 11 |
| CGGTACT  | 22 |
| CGGTAGA  | 18 |
| CGGTAGC  | 22 |
| CGGTAGG  | 14 |
| CGGTAGT  | 14 |
| CGGTATA  | 29 |
| CGGTATC  | 29 |

|         |     |
|---------|-----|
| CGGTATG | 18  |
| CGGTATT | 40  |
| CGGTCAA | 36  |
| CGGTCAC | 54  |
| CGGTCAG | 58  |
| CGGTCAT | 25  |
| CGGTCCA | 47  |
| CGGTCCC | 47  |
| CGGTCCG | 133 |
| CGGTCCT | 32  |
| CGGTCGA | 47  |
| CGGTCGC | 29  |
| CGGTCGG | 51  |
| CGGTCGT | 51  |
| CGGTCTA | 29  |
| CGGTCTC | 36  |
| CGGTCTG | 65  |
| CGGTCTT | 54  |
| CGGTGAA | 36  |
| CGGTGAC | 29  |
| CGGTGAG | 32  |
| CGGTGAT | 40  |
| CGGTGCA | 87  |
| CGGTGCC | 43  |
| CGGTGCG | 47  |
| CGGTGCT | 40  |
| CGGTGGA | 69  |
| CGGTGGC | 79  |
| CGGTGGG | 72  |
| CGGTGGT | 76  |
| CGGTGTA | 32  |
| CGGTGTC | 36  |
| CGGTGTG | 76  |
| CGGTGTT | 22  |
| CGGTTAA | 18  |
| CGGTTAC | 29  |
| CGGTTAG | 43  |
| CGGTTAT | 22  |
| CGGTTCA | 29  |
| CGGTTCA | 29  |
| CGGTTCG | 11  |
| CGGTTCT | 54  |
| CGGTTGA | 29  |
| CGGTTGC | 36  |
| CGGTTGG | 29  |
| CGGTTGT | 51  |
| CGGTTTA | 32  |
| CGGTTTC | 76  |
| CGGTTTG | 61  |
| CGGTTTT | 101 |
| CGTAAAA | 32  |
| CGTAAAC | 36  |

|         |     |
|---------|-----|
| CGTAAAG | 11  |
| CGTAAAT | 22  |
| CGTAACA | 25  |
| CGTAACC | 4   |
| CGTAACG | 22  |
| CGTAACT | 11  |
| CGTAAGA | 29  |
| CGTAAGC | 11  |
| CGTAAGG | 18  |
| CGTAAGT | 7   |
| CGTAATA | 18  |
| CGTAATC | 18  |
| CGTAATG | 36  |
| CGTAATT | 11  |
| CGTACAA | 25  |
| CGTACAC | 29  |
| CGTACAG | 29  |
| CGTACAT | 29  |
| CGTACCA | 29  |
| CGTACCC | 32  |
| CGTACCG | 36  |
| CGTACCT | 22  |
| CGTACGA | 29  |
| CGTACGC | 54  |
| CGTACGG | 22  |
| CGTACGT | 126 |
| CGTACTA | 32  |
| CGTACTC | 36  |
| CGTACTG | 40  |
| CGTACTT | 40  |
| CGTAGAA | 36  |
| CGTAGAC | 29  |
| CGTAGAG | 43  |
| CGTAGAT | 32  |
| CGTAGCA | 25  |
| CGTAGCC | 29  |
| CGTAGCG | 14  |
| CGTAGCT | 11  |
| CGTAGGA | 25  |
| CGTAGGA | 25  |
| CGTAGGC | 22  |
| CGTAGGT | 18  |
| CGTAGTA | 29  |
| CGTAGTC | 11  |
| CGTAGTG | 54  |
| CGTAGTT | 25  |
| CGTATAA | 32  |
| CGTATAC | 22  |
| CGTATAG | 29  |
| CGTATAT | 58  |
| CGTATCA | 18  |
| CGTATCC | 29  |

|         |    |
|---------|----|
| CGTATCG | 4  |
| CGTATCT | 25 |
| CGTATGA | 14 |
| CGTATGC | 11 |
| CGTATGG | 11 |
| CGTATGT | 32 |
| CGTATTA | 29 |
| CGTATTC | 22 |
| CGTATTG | 18 |
| CGTATTT | 25 |
| CGTCAAA | 32 |
| CGTCAAC | 36 |
| CGTCAAG | 25 |
| CGTCAAT | 14 |
| CGTCACA | 40 |
| CGTCACC | 79 |
| CGTCACG | 29 |
| CGTCACT | 40 |
| CGTCAGA | 51 |
| CGTCAGC | 43 |
| CGTCAGG | 18 |
| CGTCAGT | 25 |
| CGTCATA | 7  |
| CGTCATC | 32 |
| CGTCATG | 36 |
| CGTCATT | 22 |
| CGTCCAA | 43 |
| CGTCCAC | 65 |
| CGTCCAG | 32 |
| CGTCCAT | 69 |
| CGTCCCA | 58 |
| CGTCCCC | 72 |
| CGTCCCG | 40 |
| CGTCCCT | 25 |
| CGTCCGA | 51 |
| CGTCCGC | 97 |
| CGTCCGG | 61 |
| CGTCCGT | 58 |
| CGTCCTA | 18 |
| CGTCCTC | 76 |
| CGTCCTG | 43 |
| CGTCCTT | 40 |
| CGTCGAA | 29 |
| CGTCGAC | 72 |
| CGTCGAG | 51 |
| CGTCGAT | 61 |
| CGTCGCA | 36 |
| CGTCGCC | 69 |
| CGTCGCG | 65 |
| CGTCGCT | 29 |
| CGTCGGA | 36 |
| CGTCGGC | 58 |

|          |     |
|----------|-----|
| CGTCGGG  | 36  |
| CGTCGGT  | 32  |
| CGTCGTA  | 40  |
| CGTCGTC  | 170 |
| CGTCGTG  | 32  |
| CGTCGTT  | 22  |
| CGTCTAA  | 7   |
| CGTCTAC  | 22  |
| CGTCTAG  | 22  |
| CGTCTAT  | 18  |
| CGTCTCA  | 32  |
| CGTCTCC  | 58  |
| CGTCTCG  | 72  |
| CGTCTCT  | 72  |
| CGTCTGA  | 32  |
| CGTCTGC  | 32  |
| CGTCTGG  | 40  |
| CGTCTGT  | 22  |
| CGTCTTA  | 14  |
| CGTCTTC  | 94  |
| CGTCTTG  | 51  |
| CGTCTTT  | 61  |
| CGTGAAA  | 18  |
| CGTG AAC | 40  |
| CGTG AAG | 36  |
| CGTG AAT | 32  |
| CGTGACA  | 32  |
| CGTGACC  | 18  |
| CGTGACG  | 36  |
| CGTGACT  | 43  |
| CGTGAGA  | 43  |
| CGTGAGC  | 43  |
| CGTGAGG  | 14  |
| CGTGAGT  | 18  |
| CGTGATA  | 22  |
| CGTGATC  | 43  |
| CGTGATG  | 29  |
| CGTGATT  | 43  |
| CGTGCAA  | 61  |
| CGTG CAC | 65  |
| CGTG CAG | 65  |
| CGTG CAT | 76  |
| CGTGCCA  | 22  |
| CGTGCCC  | 61  |
| CGTGCCG  | 87  |
| CGTG CCT | 43  |
| CGTGCGA  | 40  |
| CGTGCGC  | 76  |
| CGTGCGG  | 36  |
| CGTGCGT  | 58  |
| CGTGCTA  | 51  |
| CGTGCTC  | 51  |



|         |     |
|---------|-----|
| CGTGCTG | 36  |
| CGTGCTT | 43  |
| CGTGGAA | 32  |
| CGTGGAC | 43  |
| CGTGGAG | 101 |
| CGTGGAT | 51  |
| CGTGGCA | 58  |
| CGTGGCC | 79  |
| CGTGGCG | 72  |
| CGTGGCT | 51  |
| CGTGGGA | 32  |
| CGTGGGC | 47  |
| CGTGGGG | 43  |
| CGTGGGT | 54  |
| CGTGGTA | 25  |
| CGTGGTC | 29  |
| CGTGGTG | 54  |
| CGTGGTT | 32  |
| CGTGTA  | 36  |
| CGTGTA  | 47  |
| CGTGTA  | 43  |
| CGTGTA  | 58  |
| CGTGTA  | 58  |
| CGTGTA  | 25  |
| CGTGTA  | 54  |
| CGTGTA  | 58  |
| CGTGTA  | 43  |
| CGTGTA  | 69  |
| CGTGTA  | 54  |
| CGTGTA  | 87  |
| CGTGTA  | 29  |
| CGTGTA  | 25  |
| CGTGTA  | 47  |
| CGTGTA  | 47  |
| CGTAAA  | 14  |
| CGTAAA  | 14  |
| CGTAAAG | 14  |
| CGTAAAT | 40  |
| CGTACA  | 47  |
| CGTACC  | 14  |
| CGTACG  | 11  |
| CGTACT  | 22  |
| CGTAGA  | 25  |
| CGTAGC  | 25  |
| CGTAGG  | 32  |
| CGTAGT  | 25  |
| CGTATA  | 7   |
| CGTATC  | 36  |
| CGTATG  | 11  |
| CGTATT  | 29  |
| CGTCAA  | 25  |
| CGTCAC  | 32  |

|         |     |
|---------|-----|
| CGTTCAG | 40  |
| CGTTCAT | 58  |
| CGTTCCA | 40  |
| CGTTCCC | 40  |
| CGTTCCG | 36  |
| CGTTCCT | 40  |
| CGTTCGA | 54  |
| CGTTCGC | 18  |
| CGTTCGG | 29  |
| CGTTCGT | 94  |
| CGTTCTA | 11  |
| CGTTCTC | 32  |
| CGTTCTG | 18  |
| CGTTCTT | 51  |
| CGTTGAA | 18  |
| CGTTGAC | 29  |
| CGTTGAG | 36  |
| CGTTGAT | 32  |
| CGTTGCA | 58  |
| CGTTGCC | 36  |
| CGTTGCG | 58  |
| CGTTGCT | 51  |
| CGTTGGA | 43  |
| CGTTGGC | 79  |
| CGTTGGG | 40  |
| CGTTGGT | 40  |
| CGTTGTA | 32  |
| CGTTGTC | 29  |
| CGTTGTG | 36  |
| CGTTGTT | 32  |
| CGTTTAA | 51  |
| CGTTTAC | 22  |
| CGTTTAG | 29  |
| CGTTTAT | 47  |
| CGTTTCA | 29  |
| CGTTTCC | 51  |
| CGTTTCG | 36  |
| CGTTTCT | 54  |
| CGTTTGA | 47  |
| CGTTTGC | 43  |
| CGTTTGG | 79  |
| CGTTTGT | 61  |
| CGTTTTA | 61  |
| CGTTTTC | 69  |
| CGTTTTG | 51  |
| CGTTTTT | 79  |
| CTAAAAA | 166 |
| CTAAAAC | 115 |
| CTAAAAG | 79  |
| CTAAAAT | 213 |
| CTAAACA | 108 |
| CTAAACC | 54  |

|         |     |
|---------|-----|
| CTAAACG | 47  |
| CTAAACT | 108 |
| CTAAAGA | 79  |
| CTAAAGC | 58  |
| CTAAAGG | 36  |
| CTAAAGT | 72  |
| CTAAATA | 119 |
| CTAAATC | 76  |
| CTAAATG | 90  |
| CTAAATT | 119 |
| CTAACAA | 79  |
| CTAACAC | 51  |
| CTAACAG | 54  |
| CTAACAT | 58  |
| CTAACCA | 58  |
| CTAACCC | 43  |
| CTAACCG | 58  |
| CTAACCT | 54  |
| CTAACGA | 36  |
| CTAACGC | 11  |
| CTAACGG | 69  |
| CTAACGT | 32  |
| CTAACTA | 69  |
| CTAACTC | 22  |
| CTAACTG | 61  |
| CTAACTT | 90  |
| CTAAGAA | 47  |
| CTAAGAC | 29  |
| CTAAGAG | 58  |
| CTAAGAT | 58  |
| CTAAGCA | 43  |
| CTAAGCC | 32  |
| CTAAGCG | 22  |
| CTAAGCT | 43  |
| CTAAGGA | 36  |
| CTAAGGC | 43  |
| CTAAGGG | 43  |
| CTAAGGT | 58  |
| CTAAGTA | 40  |
| CTAAGTA | 40  |
| CTAAGTC | 36  |
| CTAAGTG | 47  |
| CTAATAA | 94  |
| CTAATAC | 40  |
| CTAATAG | 69  |
| CTAATAT | 72  |
| CTAATCA | 51  |
| CTAATCC | 65  |
| CTAATCG | 14  |
| CTAATCT | 65  |
| CTAATGA | 72  |
| CTAATGC | 47  |

|         |     |
|---------|-----|
| CTAATGG | 40  |
| CTAATGT | 40  |
| CTAATTA | 119 |
| CTAATTC | 61  |
| CTAATTG | 65  |
| CTAATTT | 133 |
| CTACAAA | 94  |
| CTACAAC | 65  |
| CTACAAG | 43  |
| CTACAAT | 40  |
| CTACACA | 69  |
| CTACACC | 36  |
| CTACACG | 22  |
| CTACACT | 69  |
| CTACAGA | 58  |
| CTACAGC | 51  |
| CTACAGG | 40  |
| CTACAGT | 47  |
| CTACATA | 83  |
| CTACATC | 58  |
| CTACATG | 79  |
| CTACATT | 65  |
| CTACCAA | 76  |
| CTACCAC | 58  |
| CTACCAG | 40  |
| CTACCAT | 69  |
| CTACCCA | 36  |
| CTACCCC | 58  |
| CTACCCG | 4   |
| CTACCCT | 36  |
| CTACCGA | 25  |
| CTACCGC | 25  |
| CTACCGG | 25  |
| CTACCGT | 22  |
| CTACCTA | 51  |
| CTACCTC | 61  |
| CTACCTG | 7   |
| CTACCTT | 87  |
| CTACGAA | 22  |
| CTACGAC | 36  |
| CTACGAG | 11  |
| CTACGAT | 32  |
| CTACGCA | 22  |
| CTACGCC | 25  |
| CTACGCG | 11  |
| CTACGCT | 22  |
| CTACGGA | 25  |
| CTACGGC | 25  |
| CTACGGG | 36  |
| CTACGGT | 22  |
| CTACGTA | 36  |
| CTACGTC | 40  |

|         |     |
|---------|-----|
| CTACGTG | 29  |
| CTACGTT | 29  |
| CTACTAA | 65  |
| CTACTAC | 90  |
| CTACTAG | 94  |
| CTACTAT | 54  |
| CTACTCA | 58  |
| CTACTCC | 79  |
| CTACTCG | 43  |
| CTACTCT | 47  |
| CTACTGA | 40  |
| CTACTGC | 47  |
| CTACTGG | 40  |
| CTACTGT | 40  |
| CTACTTA | 58  |
| CTACTTC | 61  |
| CTACTTG | 69  |
| CTACTTT | 105 |
| CTAGAAA | 126 |
| CTAGAAC | 58  |
| CTAGAAG | 43  |
| CTAGAAT | 79  |
| CTAGACA | 40  |
| CTAGACC | 72  |
| CTAGACG | 18  |
| CTAGACT | 72  |
| CTAGAGA | 126 |
| CTAGAGC | 101 |
| CTAGAGG | 36  |
| CTAGAGT | 51  |
| CTAGATA | 76  |
| CTAGATA | 76  |
| CTAGATG | 61  |
| CTAGATT | 87  |
| CTAGCAA | 94  |
| CTAGCAC | 58  |
| CTAGCAG | 58  |
| CTAGCAT | 65  |
| CTAGCCA | 72  |
| CTAGCCC | 69  |
| CTAGCCG | 79  |
| CTAGCCT | 58  |
| CTAGCGA | 47  |
| CTAGCGC | 18  |
| CTAGCGG | 32  |
| CTAGCGT | 25  |
| CTAGCTA | 209 |
| CTAGCTC | 69  |
| CTAGCTG | 83  |
| CTAGCTT | 90  |
| CTAGGAA | 61  |
| CTAGGAC | 47  |

|         |     |
|---------|-----|
| CTAGGAG | 51  |
| CTAGGAT | 43  |
| CTAGGCA | 54  |
| CTAGGCC | 58  |
| CTAGGCG | 69  |
| CTAGGCT | 65  |
| CTAGGGA | 40  |
| CTAGGGC | 32  |
| CTAGGGG | 25  |
| CTAGGGT | 25  |
| CTAGGTA | 40  |
| CTAGGTC | 47  |
| CTAGGTG | 61  |
| CTAGGTT | 25  |
| CTAGTAA | 58  |
| CTAGTAC | 32  |
| CTAGTAG | 58  |
| CTAGTAT | 51  |
| CTAGTCA | 58  |
| CTAGTCC | 47  |
| CTAGTCG | 36  |
| CTAGTCT | 51  |
| CTAGTGA | 40  |
| CTAGTGC | 47  |
| CTAGTGG | 51  |
| CTAGTGT | 69  |
| CTAGTTA | 105 |
| CTAGTTC | 36  |
| CTAGTTG | 43  |
| CTAGTTT | 141 |
| CTATAAA | 242 |
| CTATAAC | 36  |
| CTATAAG | 61  |
| CTATAAT | 83  |
| CTATACA | 43  |
| CTATACA | 43  |
| CTATACC | 25  |
| CTATACT | 54  |
| CTATAGA | 90  |
| CTATAGC | 79  |
| CTATAGG | 47  |
| CTATAGT | 51  |
| CTATATA | 245 |
| CTATATC | 72  |
| CTATATG | 101 |
| CTATATT | 126 |
| CTATCAA | 65  |
| CTATCAC | 61  |
| CTATCAG | 29  |
| CTATCAT | 79  |
| CTATCCA | 61  |
| CTATCCC | 18  |

|         |     |
|---------|-----|
| CTATCCG | 29  |
| CTATCCT | 18  |
| CTATCGA | 32  |
| CTATCGC | 22  |
| CTATCGG | 11  |
| CTATCGT | 18  |
| CTATCTA | 65  |
| CTATCTC | 72  |
| CTATCTG | 47  |
| CTATCTT | 69  |
| CTATGAA | 72  |
| CTATGAC | 47  |
| CTATGAG | 32  |
| CTATGAT | 94  |
| CTATGCA | 83  |
| CTATGCC | 43  |
| CTATGCG | 11  |
| CTATGCT | 36  |
| CTATGGA | 40  |
| CTATGGC | 58  |
| CTATGGG | 40  |
| CTATGGT | 58  |
| CTATGTA | 79  |
| CTATGTC | 40  |
| CTATGTG | 69  |
| CTATGTT | 61  |
| CTATTAA | 94  |
| CTATTAC | 43  |
| CTATTAG | 40  |
| CTATTAT | 79  |
| CTATTCA | 141 |
| CTATTCC | 14  |
| CTATTCG | 25  |
| CTATTCT | 65  |
| CTATTGA | 65  |
| CTATTGC | 32  |
| CTATTGG | 65  |
| CTATTGT | 83  |
| CTATTTA | 162 |
| CTATTTT | 90  |
| CTATTTG | 105 |
| CTATTTT | 180 |
| CTCAAAA | 101 |
| CTCAAAC | 72  |
| CTCAAAG | 54  |
| CTCAAAT | 144 |
| CTCAACA | 112 |
| CTCAACC | 69  |
| CTCAACG | 47  |
| CTCAACT | 61  |
| CTCAAGA | 65  |
| CTCAAGC | 51  |

|         |     |
|---------|-----|
| CTCAAGG | 54  |
| CTCAAGT | 72  |
| CTCAATA | 58  |
| CTCAATC | 83  |
| CTCAATG | 36  |
| CTCAATT | 90  |
| CTCACAA | 43  |
| CTCACAC | 72  |
| CTCACAG | 32  |
| CTCACAT | 76  |
| CTCACCA | 79  |
| CTCACCC | 58  |
| CTCACCG | 65  |
| CTCACCT | 43  |
| CTCACGA | 32  |
| CTCACGC | 79  |
| CTCACGG | 43  |
| CTCACGT | 32  |
| CTCACTA | 54  |
| CTCACTC | 97  |
| CTCACTG | 40  |
| CTCACTT | 65  |
| CTCAGAA | 54  |
| CTCAGAC | 40  |
| CTCAGAG | 36  |
| CTCAGAT | 25  |
| CTCAGCA | 36  |
| CTCAGCC | 72  |
| CTCAGCG | 29  |
| CTCAGCT | 58  |
| CTCAGGA | 32  |
| CTCAGGC | 32  |
| CTCAGGG | 29  |
| CTCAGGT | 29  |
| CTCAGTA | 25  |
| CTCAGTC | 32  |
| CTCAGTG | 22  |
| CTCAGTT | 40  |
| CTCATAA | 65  |
| CTCATAC | 36  |
| CTCATAG | 51  |
| CTCATAT | 133 |
| CTCATCA | 130 |
| CTCATCC | 87  |
| CTCATCG | 36  |
| CTCATCT | 133 |
| CTCATGA | 58  |
| CTCATGC | 72  |
| CTCATGG | 65  |
| CTCATGT | 101 |
| CTCATTA | 65  |
| CTCATTC | 65  |



|         |     |
|---------|-----|
| CTCATTG | 58  |
| CTCATTT | 130 |
| CTCCAAA | 152 |
| CTCCAAC | 83  |
| CTCCAAG | 69  |
| CTCCAAT | 83  |
| CTCCACA | 72  |
| CTCCACC | 148 |
| CTCCACG | 40  |
| CTCCACT | 79  |
| CTCCAGA | 65  |
| CTCCAGC | 72  |
| CTCCAGG | 29  |
| CTCCAGT | 36  |
| CTCCATA | 51  |
| CTCCATC | 115 |
| CTCCATG | 76  |
| CTCCATT | 72  |
| CTCCCAA | 90  |
| CTCCCAC | 79  |
| CTCCCAG | 54  |
| CTCCCAT | 79  |
| CTCCCCA | 87  |
| CTCCCCC | 180 |
| CTCCCCG | 58  |
| CTCCCCT | 97  |
| CTCCCGA | 32  |
| CTCCCGC | 76  |
| CTCCCGG | 25  |
| CTCCCGT | 47  |
| CTCCCTA | 43  |
| CTCCCTC | 155 |
| CTCCCTG | 76  |
| CTCCCTT | 79  |
| CTCCGAA | 32  |
| CTCCGAC | 58  |
| CTCCGAG | 18  |
| CTCCGAT | 51  |
| CTCCGCA | 29  |
| CTCCGCC | 58  |
| CTCCGCG | 29  |
| CTCCGCT | 61  |
| CTCCGGA | 32  |
| CTCCGGC | 58  |
| CTCCGGG | 47  |
| CTCCGGT | 36  |
| CTCCGTA | 32  |
| CTCCGTC | 54  |
| CTCCGTG | 32  |
| CTCCGTT | 47  |
| CTCCTAA | 47  |
| CTCCTAA | 47  |

|         |     |
|---------|-----|
| CTCCTAC | 79  |
| CTCCTAG | 43  |
| CTCCTCA | 130 |
| CTCCTCC | 285 |
| CTCCTCG | 79  |
| CTCCTCT | 256 |
| CTCCTGA | 47  |
| CTCCTGC | 83  |
| CTCCTGG | 32  |
| CTCCTGT | 69  |
| CTCCTTA | 51  |
| CTCCTTC | 133 |
| CTCCTTG | 83  |
| CTCCTTT | 126 |
| CTCGAAA | 58  |
| CTCGAAC | 40  |
| CTCGAAG | 36  |
| CTCGAAT | 29  |
| CTCGACA | 40  |
| CTCGACC | 36  |
| CTCGACG | 22  |
| CTCGACT | 61  |
| CTCGAGA | 25  |
| CTCGAGC | 40  |
| CTCGAGG | 40  |
| CTCGAGT | 29  |
| CTCGATA | 47  |
| CTCGATC | 87  |
| CTCGATG | 40  |
| CTCGATT | 47  |
| CTCGCAA | 29  |
| CTCGCAC | 25  |
| CTCGCAG | 25  |
| CTCGCAT | 54  |
| CTCGCCA | 72  |
| CTCGCCC | 83  |
| CTCGCCG | 105 |
| CTCGCCT | 54  |
| CTCGCGA | 47  |
| CTCGCGC | 58  |
| CTCGCGG | 47  |
| CTCGCGT | 43  |
| CTCGCTA | 32  |
| CTCGCTC | 97  |
| CTCGCTG | 51  |
| CTCGCTT | 47  |
| CTCGGAA | 54  |
| CTCGGAA | 54  |
| CTCGGAG | 25  |
| CTCGGAT | 29  |
| CTCGGCA | 65  |
| CTCGGCC | 65  |

|         |     |
|---------|-----|
| CTCGGCG | 40  |
| CTCGGCT | 61  |
| CTCGGGA | 22  |
| CTCGGGC | 40  |
| CTCGGGG | 51  |
| CTCGGGT | 32  |
| CTCGGTA | 32  |
| CTCGGTC | 51  |
| CTCGGTG | 29  |
| CTCGGTT | 47  |
| CTCGTAA | 7   |
| CTCGTAC | 25  |
| CTCGTAG | 51  |
| CTCGTAT | 22  |
| CTCGTCA | 36  |
| CTCGTCC | 83  |
| CTCGTCG | 54  |
| CTCGTCT | 65  |
| CTCGTGA | 40  |
| CTCGTGC | 40  |
| CTCGTGG | 51  |
| CTCGTGT | 32  |
| CTCGTTA | 40  |
| CTCGTTC | 29  |
| CTCGTTG | 54  |
| CTCGTTT | 72  |
| CTCTAAA | 119 |
| CTCTAAC | 36  |
| CTCTAAG | 58  |
| CTCTAAT | 61  |
| CTCTACA | 54  |
| CTCTACC | 36  |
| CTCTACG | 32  |
| CTCTACT | 83  |
| CTCTAGA | 72  |
| CTCTAGC | 112 |
| CTCTAGG | 83  |
| CTCTAGT | 72  |
| CTCTATA | 112 |
| CTCTATC | 61  |
| CTCTATG | 58  |
| CTCTATT | 112 |
| CTCTCAA | 94  |
| CTCTCAC | 97  |
| CTCTCAG | 61  |
| CTCTCAT | 94  |
| CTCTCCA | 130 |
| CTCTCCC | 141 |
| CTCTCCG | 51  |
| CTCTCCT | 220 |
| CTCTCGA | 25  |
| CTCTCGC | 61  |

|         |     |
|---------|-----|
| CTCTCGG | 72  |
| CTCTCGT | 65  |
| CTCTCTA | 126 |
| CTCTCTC | 570 |
| CTCTCTG | 61  |
| CTCTCTT | 148 |
| CTCTGAA | 51  |
| CTCTGAC | 32  |
| CTCTGAG | 14  |
| CTCTGAT | 61  |
| CTCTGCA | 76  |
| CTCTGCC | 90  |
| CTCTGCG | 43  |
| CTCTGCT | 105 |
| CTCTGGA | 22  |
| CTCTGGC | 36  |
| CTCTGGG | 25  |
| CTCTGGT | 40  |
| CTCTGTA | 47  |
| CTCTGTC | 61  |
| CTCTGTG | 61  |
| CTCTGTT | 54  |
| CTCTTAA | 43  |
| CTCTTAC | 58  |
| CTCTTAG | 58  |
| CTCTTAT | 58  |
| CTCTTCA | 119 |
| CTCTTCC | 105 |
| CTCTTCG | 76  |
| CTCTTCT | 173 |
| CTCTTGA | 83  |
| CTCTTGA | 83  |
| CTCTTGC | 97  |
| CTCTTGT | 141 |
| CTCTTTA | 72  |
| CTCTTTC | 112 |
| CTCTTTG | 101 |
| CTCTTTT | 115 |
| CTGAAAA | 79  |
| CTGAAAC | 61  |
| CTGAAAG | 61  |
| CTGAAAT | 79  |
| CTGAACA | 36  |
| CTGAACC | 65  |
| CTGAACG | 29  |
| CTGAACT | 25  |
| CTGAAGA | 83  |
| CTGAAGC | 32  |
| CTGAAGG | 25  |
| CTGAAGT | 25  |
| CTGAATA | 51  |
| CTGAATC | 61  |

|         |    |
|---------|----|
| CTGAATG | 51 |
| CTGAATT | 54 |
| CTGACAA | 36 |
| CTGACAC | 40 |
| CTGACAG | 36 |
| CTGACAT | 40 |
| CTGACCA | 61 |
| CTGACCA | 61 |
| CTGACCG | 43 |
| CTGACCT | 40 |
| CTGACGA | 32 |
| CTGACGC | 14 |
| CTGACGG | 36 |
| CTGACGT | 47 |
| CTGACTA | 40 |
| CTGACTC | 29 |
| CTGACTG | 47 |
| CTGACTT | 43 |
| CTGAGAA | 51 |
| CTGAGAC | 32 |
| CTGAGAG | 51 |
| CTGAGAT | 54 |
| CTGAGCA | 65 |
| CTGAGCC | 65 |
| CTGAGCG | 22 |
| CTGAGCT | 58 |
| CTGAGGA | 36 |
| CTGAGGC | 43 |
| CTGAGGG | 32 |
| CTGAGGT | 22 |
| CTGAGTA | 36 |
| CTGAGTC | 25 |
| CTGAGTG | 22 |
| CTGAGTT | 36 |
| CTGATAA | 36 |
| CTGATAC | 25 |
| CTGATAG | 18 |
| CTGATAT | 72 |
| CTGATCA | 61 |
| CTGATCC | 43 |
| CTGATCG | 29 |
| CTGATCT | 51 |
| CTGATGA | 94 |
| CTGATGC | 43 |
| CTGATGG | 40 |
| CTGATGT | 83 |
| CTGATTA | 40 |
| CTGATTC | 29 |
| CTGATTG | 47 |
| CTGATTT | 76 |
| CTGCAAA | 61 |
| CTGCAAC | 58 |

|         |     |
|---------|-----|
| CTGCAAG | 79  |
| CTGCAAT | 58  |
| CTGCACA | 58  |
| CTGCACC | 76  |
| CTGCACG | 54  |
| CTGCACT | 65  |
| CTGCAGA | 43  |
| CTGCAGC | 61  |
| CTGCAGG | 51  |
| CTGCAGT | 32  |
| CTGCATA | 61  |
| CTGCATC | 43  |
| CTGCATG | 87  |
| CTGCATT | 87  |
| CTGCCAA | 29  |
| CTGCCAC | 51  |
| CTGCCAG | 54  |
| CTGCCAT | 54  |
| CTGCCCA | 54  |
| CTGCCCC | 65  |
| CTGCCCG | 36  |
| CTGCCCT | 83  |
| CTGCCGA | 43  |
| CTGCCGC | 72  |
| CTGCCGG | 40  |
| CTGCCGT | 51  |
| CTGCCTA | 25  |
| CTGCCTC | 94  |
| CTGCCTG | 94  |
| CTGCCTT | 87  |
| CTGCGAA | 29  |
| CTGCGAC | 29  |
| CTGCGAG | 25  |
| CTGCGAT | 40  |
| CTGCGCA | 43  |
| CTGCGCC | 54  |
| CTGCGCG | 51  |
| CTGCGCT | 29  |
| CTGCGGA | 25  |
| CTGCGGC | 58  |
| CTGCGGG | 32  |
| CTGCGGT | 18  |
| CTGCGTA | 25  |
| CTGCGTC | 36  |
| CTGCGTG | 87  |
| CTGCGTT | 25  |
| CTGCTAA | 65  |
| CTGCTAC | 40  |
| CTGCTAG | 54  |
| CTGCTAT | 79  |
| CTGCTCA | 47  |
| CTGCTCC | 115 |

|         |     |
|---------|-----|
| CTGCTCG | 54  |
| CTGCTCT | 87  |
| CTGCTGA | 61  |
| CTGCTGC | 144 |
| CTGCTGG | 61  |
| CTGCTGT | 87  |
| CTGCTTA | 43  |
| CTGCTTC | 61  |
| CTGCTTG | 76  |
| CTGCTTT | 47  |
| CTGGAAA | 76  |
| CTGGAAC | 40  |
| CTGGAAG | 54  |
| CTGGAAT | 14  |
| CTGGACA | 47  |
| CTGGACC | 51  |
| CTGGACG | 25  |
| CTGGACT | 51  |
| CTGGAGA | 54  |
| CTGGAGC | 58  |
| CTGGAGG | 43  |
| CTGGAGT | 22  |
| CTGGATA | 11  |
| CTGGATC | 65  |
| CTGGATG | 25  |
| CTGGATT | 32  |
| CTGGCAA | 29  |
| CTGGCAC | 61  |
| CTGGCAG | 32  |
| CTGGCAT | 43  |
| CTGGCCA | 51  |
| CTGGCCC | 29  |
| CTGGCCG | 47  |
| CTGGCCT | 43  |
| CTGGCGA | 32  |
| CTGGCGC | 58  |
| CTGGCGG | 51  |
| CTGGCGT | 32  |
| CTGGCTA | 36  |
| CTGGCTC | 36  |
| CTGGCTG | 58  |
| CTGGCTT | 51  |
| CTGGGAA | 40  |
| CTGGGAA | 40  |
| CTGGGAC | 14  |
| CTGGGAT | 25  |
| CTGGGCA | 29  |
| CTGGGCC | 69  |
| CTGGGCG | 22  |
| CTGGGCT | 29  |
| CTGGGGA | 29  |
| CTGGGGC | 43  |

|         |     |
|---------|-----|
| CTGGGGG | 47  |
| CTGGGGT | 29  |
| CTGGGTA | 14  |
| CTGGGTC | 47  |
| CTGGGTG | 47  |
| CTGGGTT | 25  |
| CTGGTAA | 22  |
| CTGGTAC | 14  |
| CTGGTAG | 25  |
| CTGGTAT | 58  |
| CTGGTCA | 47  |
| CTGGTCC | 54  |
| CTGGTCG | 43  |
| CTGGTCT | 43  |
| CTGGTGA | 32  |
| CTGGTGC | 79  |
| CTGGTGG | 58  |
| CTGGTGT | 43  |
| CTGGTTA | 22  |
| CTGGTTC | 51  |
| CTGGTTG | 51  |
| CTGGTTT | 79  |
| CTGAAA  | 65  |
| CTGTAAC | 47  |
| CTGTAAG | 18  |
| CTGTAAT | 51  |
| CTGTACA | 65  |
| CTGTACC | 25  |
| CTGTACG | 32  |
| CTGTACT | 36  |
| CTGTAGA | 61  |
| CTGTAGC | 83  |
| CTGTAGG | 43  |
| CTGTAGT | 79  |
| CTGTATA | 47  |
| CTGTATC | 25  |
| CTGTATG | 36  |
| CTGTATT | 54  |
| CTGTCAA | 29  |
| CTGTCAC | 51  |
| CTGTCAG | 36  |
| CTGTCAT | 43  |
| CTGTCCA | 76  |
| CTGTCCC | 51  |
| CTGTCCG | 133 |
| CTGTCCT | 54  |
| CTGTCGA | 40  |
| CTGTCGC | 29  |
| CTGTCGG | 25  |
| CTGTCGT | 58  |
| CTGTCTA | 29  |
| CTGTCTC | 40  |



|          |     |
|----------|-----|
| CTGTCTG  | 40  |
| CTGTCTT  | 61  |
| CTGTGAA  | 97  |
| CTGTGAC  | 25  |
| CTGTGAG  | 32  |
| CTGTGAT  | 43  |
| CTGTGCA  | 58  |
| CTGTGCC  | 43  |
| CTGTGCG  | 61  |
| CTGTGCT  | 61  |
| CTGTGGA  | 58  |
| CTGTGGC  | 25  |
| CTGTGGG  | 32  |
| CTGTGGT  | 43  |
| CTGTGTA  | 54  |
| CTGTGTC  | 51  |
| CTGTGTG  | 54  |
| CTGTGTT  | 83  |
| CTGTTAA  | 32  |
| CTGTTAC  | 40  |
| CTGTTAG  | 47  |
| CTGTTAT  | 61  |
| CTGTTCA  | 51  |
| CTGTTCC  | 54  |
| CTGTTCCG | 51  |
| CTGTTCT  | 123 |
| CTGTTGA  | 58  |
| CTGTTGA  | 58  |
| CTGTTGC  | 58  |
| CTGTTGG  | 29  |
| CTGTTTA  | 51  |
| CTGTTTC  | 72  |
| CTGTTTG  | 105 |
| CTGTTTT  | 112 |
| CTTAAAA  | 97  |
| CTTAAAC  | 69  |
| CTTAAAG  | 72  |
| CTTAAAT  | 112 |
| CTTAAACA | 61  |
| CTTAAACC | 25  |
| CTTAAACG | 22  |
| CTTAAACT | 69  |
| CTTAAAGA | 22  |
| CTTAAAGC | 40  |
| CTTAAAGG | 51  |
| CTTAAAGT | 43  |
| CTTAAATA | 87  |
| CTTAAATC | 29  |
| CTTAAATG | 43  |
| CTTAAATT | 97  |
| CTTACAA  | 101 |
| CTTACAC  | 36  |

|         |     |
|---------|-----|
| CTTACAG | 14  |
| CTTACAT | 40  |
| CTTACCA | 14  |
| CTTACCC | 11  |
| CTTACCG | 14  |
| CTTACCT | 40  |
| CTTACGA | 18  |
| CTTACGC | 11  |
| CTTACGG | 14  |
| CTTACGT | 22  |
| CTTACTA | 22  |
| CTTACTC | 54  |
| CTTACTG | 25  |
| CTTACTT | 47  |
| CTTAGAA | 43  |
| CTTAGAC | 36  |
| CTTAGAG | 58  |
| CTTAGAT | 58  |
| CTTAGCA | 65  |
| CTTAGCC | 47  |
| CTTAGCG | 29  |
| CTTAGCT | 61  |
| CTTAGGA | 43  |
| CTTAGGC | 36  |
| CTTAGGG | 61  |
| CTTAGGT | 22  |
| CTTAGTA | 69  |
| CTTAGTC | 14  |
| CTTAGTG | 69  |
| CTTAGTT | 51  |
| CTTATAA | 90  |
| CTTATAC | 51  |
| CTTATAG | 32  |
| CTTATAT | 115 |
| CTTATCA | 43  |
| CTTATCC | 87  |
| CTTATCG | 18  |
| CTTATCT | 61  |
| CTTATGA | 47  |
| CTTATGC | 43  |
| CTTATGG | 51  |
| CTTATGT | 40  |
| CTTATTA | 90  |
| CTTATTC | 58  |
| CTTATTG | 87  |
| CTTATTT | 173 |
| CTTCAAA | 115 |
| CTTCAAC | 43  |
| CTTCAAG | 72  |
| CTTCAAT | 101 |
| CTTCACA | 72  |
| CTTCACC | 69  |

|         |     |
|---------|-----|
| CTTCACG | 43  |
| CTTCACT | 51  |
| CTTCAGA | 51  |
| CTTCAGC | 58  |
| CTTCAGG | 29  |
| CTTCAGT | 58  |
| CTTCATA | 54  |
| CTTCATC | 108 |
| CTTCATG | 69  |
| CTTCATT | 87  |
| CTTCCAA | 65  |
| CTTCCAC | 69  |
| CTTCCAG | 61  |
| CTTCCAT | 87  |
| CTTCCCA | 83  |
| CTTCCCC | 126 |
| CTTCCCG | 22  |
| CTTCCCT | 115 |
| CTTCCGA | 40  |
| CTTCCGC | 36  |
| CTTCCGG | 51  |
| CTTCCGT | 58  |
| CTTCCTA | 69  |
| CTTCCTC | 152 |
| CTTCCTG | 87  |
| CTTCCTT | 141 |
| CTTCGAA | 43  |
| CTTCGAC | 54  |
| CTTCGAG | 47  |
| CTTCGAT | 51  |
| CTTCGCA | 36  |
| CTTCGCC | 51  |
| CTTCGCG | 40  |
| CTTCGCT | 43  |
| CTTCGGA | 29  |
| CTTCGGC | 51  |
| CTTCGGG | 69  |
| CTTCGGT | 32  |
| CTTCGTA | 32  |
| CTTCGTC | 97  |
| CTTCGTG | 54  |
| CTTCGTT | 94  |
| CTTCTAA | 101 |
| CTTCTAC | 83  |
| CTTCTAG | 58  |
| CTTCTAT | 72  |
| CTTCTCA | 69  |
| CTTCTCC | 115 |
| CTTCTCG | 47  |
| CTTCTCT | 159 |
| CTTCTGA | 29  |
| CTTCTGC | 79  |

|         |     |
|---------|-----|
| CTTCTGG | 69  |
| CTTCTGT | 69  |
| CTTCTTA | 112 |
| CTTCTTC | 260 |
| CTTCTTG | 119 |
| CTTCTTT | 141 |
| CTTGAAA | 76  |
| CTTGAAC | 51  |
| CTTGAAG | 47  |
| CTTGAAT | 40  |
| CTTGACA | 47  |
| CTTGACC | 40  |
| CTTGACG | 36  |
| CTTGACT | 36  |
| CTTGAGA | 90  |
| CTTGAGC | 36  |
| CTTGAGG | 58  |
| CTTGAGT | 87  |
| CTTGATA | 61  |
| CTTGATA | 61  |
| CTTGATC | 76  |
| CTTGATT | 101 |
| CTTGCAA | 101 |
| CTTGCAC | 79  |
| CTTGCAg | 54  |
| CTTGcAT | 126 |
| CTTGCCA | 69  |
| CTTGCCC | 61  |
| CTTGCCG | 40  |
| CTTGcCT | 51  |
| CTTGCGA | 32  |
| CTTGCGC | 69  |
| CTTGCGG | 47  |
| CTTGCGT | 36  |
| CTTGCTA | 69  |
| CTTGCTC | 105 |
| CTTGCTG | 72  |
| CTTGCTT | 94  |
| CTTGGA  | 119 |
| CTTGGAC | 79  |
| CTTGGAG | 105 |
| CTTGGAT | 119 |
| CTTGGCA | 87  |
| CTTGGCC | 54  |
| CTTGGCG | 51  |
| CTTGGCT | 83  |
| CTTGGGA | 54  |
| CTTGGGC | 43  |
| CTTGGGG | 32  |
| CTTGGGT | 47  |
| CTTGGTA | 51  |
| CTTGGTC | 51  |

|         |     |
|---------|-----|
| CTTGGTG | 87  |
| CTTGGTT | 94  |
| CTTGTA  | 90  |
| CTTGTA  | 72  |
| CTTGTA  | 79  |
| CTTGTA  | 97  |
| CTTGTA  | 79  |
| CTTGTC  | 69  |
| CTTGTC  | 36  |
| CTTGTC  | 87  |
| CTTGTA  | 61  |
| CTTGTC  | 105 |
| CTTGTC  | 97  |
| CTTGTC  | 141 |
| CTTGTA  | 130 |
| CTTGTC  | 133 |
| CTTGTC  | 115 |
| CTTGTC  | 159 |
| CTTAAA  | 119 |
| CTTAA   | 25  |
| CTTAA   | 51  |
| CTTAA   | 126 |
| CTTAA   | 65  |
| CTTAA   | 65  |
| CTTAA   | 36  |
| CTTAA   | 11  |
| CTTAGA  | 83  |
| CTTAGA  | 72  |
| CTTAGA  | 61  |
| CTTAGA  | 65  |
| CTTATA  | 90  |
| CTTATC  | 72  |
| CTTATG  | 72  |
| CTTATT  | 144 |
| CTTCAA  | 94  |
| CTTCAC  | 43  |
| CTTCAG  | 61  |
| CTTCAT  | 83  |
| CTTCCA  | 101 |
| CTTCCC  | 87  |
| CTTCCG  | 36  |
| CTTCCT  | 108 |
| CTTCGA  | 25  |
| CTTCGC  | 36  |
| CTTCGG  | 54  |
| CTTCGT  | 36  |
| CTTCTA  | 83  |
| CTTCTC  | 130 |
| CTTCTG  | 119 |
| CTTCTT  | 188 |
| CTTGAA  | 94  |
| CTTGAC  | 76  |

|         |     |
|---------|-----|
| CTTTGAG | 76  |
| CTTTGAT | 108 |
| CTTTGCA | 61  |
| CTTTGCC | 123 |
| CTTTGCG | 40  |
| CTTTGCT | 130 |
| CTTTGGA | 87  |
| CTTTGGC | 79  |
| CTTTGGG | 79  |
| CTTTGGT | 79  |
| CTTTGTA | 47  |
| CTTTGTC | 133 |
| CTTTGTG | 123 |
| CTTTGTT | 184 |
| CTTTTAA | 90  |
| CTTTTAC | 54  |
| CTTTTAG | 54  |
| CTTTTAT | 152 |
| CTTTTCA | 144 |
| CTTTTCC | 148 |
| CTTTTCG | 40  |
| CTTTTCT | 170 |
| CTTTTGA | 141 |
| CTTTTGC | 112 |
| CTTTTGG | 90  |
| CTTTTGT | 159 |
| CTTTTTA | 148 |
| CTTTTTC | 126 |
| CTTTTTG | 137 |
| CTTTTTT | 278 |
| GAAAAAA | 343 |
| GAAAAAC | 76  |
| GAAAAAG | 148 |
| GAAAAAT | 173 |
| GAAAACA | 184 |
| GAAAACC | 97  |
| GAAAACG | 47  |
| GAAAACT | 90  |
| GAAAAGA | 137 |
| GAAAAGC | 83  |
| GAAAAGG | 108 |
| GAAAAGT | 105 |
| GAAAATA | 155 |
| GAAAATC | 58  |
| GAAAATG | 137 |
| GAAAATT | 101 |
| GAAACAA | 159 |
| GAAACAC | 72  |
| GAAACAG | 51  |
| GAAACAT | 94  |
| GAAACCA | 101 |
| GAAACCC | 51  |

|         |     |
|---------|-----|
| GAAACCG | 47  |
| GAAACCT | 61  |
| GAAACGA | 61  |
| GAAACGC | 25  |
| GAAACGG | 25  |
| GAAACGT | 18  |
| GAAACTA | 58  |
| GAAACTC | 51  |
| GAAACTG | 97  |
| GAAACTT | 83  |
| GAAAGAA | 148 |
| GAAAGAA | 148 |
| GAAAGAC | 43  |
| GAAAGAG | 108 |
| GAAAGCA | 130 |
| GAAAGCC | 36  |
| GAAAGCG | 51  |
| GAAAGCT | 69  |
| GAAAGGA | 72  |
| GAAAGGC | 36  |
| GAAAGGG | 97  |
| GAAAGGT | 79  |
| GAAAGTA | 40  |
| GAAAGTC | 36  |
| GAAAGTG | 36  |
| GAAAGTT | 87  |
| GAAATAA | 112 |
| GAAATAC | 61  |
| GAAATAG | 76  |
| GAAATAT | 115 |
| GAAATCA | 69  |
| GAAATCC | 47  |
| GAAATCG | 43  |
| GAAATCT | 72  |
| GAAATGA | 69  |
| GAAATGC | 58  |
| GAAATGG | 90  |
| GAAATGT | 90  |
| GAAATTA | 94  |
| GAAATTC | 69  |
| GAAATTG | 90  |
| GAAATTT | 126 |
| GAACAAA | 79  |
| GAACAAC | 72  |
| GAACAAG | 79  |
| GAACAAT | 61  |
| GAACACA | 58  |
| GAACACC | 40  |
| GAACACG | 36  |
| GAACACT | 43  |
| GAACAGA | 40  |
| GAACAGC | 51  |

|          |    |
|----------|----|
| GAACAGG  | 61 |
| GAACAGT  | 32 |
| GAACATA  | 36 |
| GAACATC  | 47 |
| GAACATG  | 69 |
| GAACATT  | 32 |
| GAACCAA  | 79 |
| GAACCAC  | 65 |
| GAACCAG  | 58 |
| GAACCAT  | 58 |
| GAACCCA  | 54 |
| GAACCCC  | 25 |
| GAACCCG  | 22 |
| GAACCCCT | 79 |
| GAACCGA  | 79 |
| GAACCGC  | 14 |
| GAACCGG  | 83 |
| GAACCGT  | 47 |
| GAACCTA  | 58 |
| GAACCTC  | 22 |
| GAACCTG  | 43 |
| GAACCTT  | 61 |
| GAACGAA  | 40 |
| GAACGAC  | 61 |
| GAACGAG  | 32 |
| GAACGAT  | 32 |
| GAACGCA  | 22 |
| GAACGCC  | 18 |
| GAACGCG  | 25 |
| GAACGCT  | 25 |
| GAACGGA  | 32 |
| GAACGGA  | 32 |
| GAACGGC  | 36 |
| GAACGGT  | 18 |
| GAACGTA  | 18 |
| GAACGTC  | 18 |
| GAACGTG  | 25 |
| GAACGTT  | 11 |
| GAACTAA  | 54 |
| GAACTAC  | 51 |
| GAACTAG  | 61 |
| GAACTAT  | 76 |
| GAACTCA  | 54 |
| GAACTCC  | 32 |
| GAACTCG  | 40 |
| GAACTCT  | 54 |
| GAACTGA  | 36 |
| GAACTGC  | 40 |
| GAACTGG  | 36 |
| GAACTGT  | 25 |
| GAACTTA  | 58 |
| GAACTTC  | 43 |



|          |     |
|----------|-----|
| GAACTTG  | 54  |
| GAAC TTT | 61  |
| GAAGAAA  | 170 |
| GAAGAAA  | 170 |
| GAAGAAG  | 271 |
| GAAGAAT  | 69  |
| GAAGACA  | 54  |
| GAAGACC  | 58  |
| GAAGACG  | 40  |
| GAAGACT  | 79  |
| GAAGAGA  | 126 |
| GAAGAGC  | 94  |
| GAAGAGG  | 97  |
| GAAGAGT  | 61  |
| GAAGATA  | 76  |
| GAAGATC  | 43  |
| GAAGATG  | 101 |
| GAAGATT  | 87  |
| GAAGCAA  | 105 |
| GAAGCAC  | 47  |
| GAAGCAG  | 51  |
| GAAGCAT  | 54  |
| GAAGCCA  | 54  |
| GAAGCCC  | 47  |
| GAAGCCG  | 47  |
| GAAGCCT  | 61  |
| GAAGCGA  | 65  |
| GAAGCGC  | 22  |
| GAAGCGG  | 32  |
| GAAGCGT  | 11  |
| GAAGCTA  | 79  |
| GAAGCTC  | 40  |
| GAAGCTG  | 58  |
| GAAGCTT  | 40  |
| GAAGGAA  | 58  |
| GAAGGAC  | 36  |
| GAAGGAG  | 83  |
| GAAGGAT  | 65  |
| GAAGGCA  | 58  |
| GAAGGCC  | 29  |
| GAAGGCG  | 40  |
| GAAGGCT  | 29  |
| GAAGGGA  | 58  |
| GAAGGGC  | 32  |
| GAAGGGG  | 69  |
| GAAGGGT  | 14  |
| GAAGGTA  | 51  |
| GAAGGTC  | 22  |
| GAAGGTG  | 69  |
| GAAGGTT  | 43  |
| GAAGTAA  | 36  |
| GAAGTAC  | 25  |

|         |     |
|---------|-----|
| GAAGTAG | 36  |
| GAAGTAT | 54  |
| GAAGTCA | 40  |
| GAAGTCC | 51  |
| GAAGTCG | 25  |
| GAAGTCT | 47  |
| GAAGTGA | 58  |
| GAAGTGC | 54  |
| GAAGTGG | 65  |
| GAAGTGT | 58  |
| GAAGTTA | 58  |
| GAAGTTC | 32  |
| GAAGTTG | 69  |
| GAAGTTT | 83  |
| GAATAAA | 162 |
| GAATAAC | 54  |
| GAATAAG | 58  |
| GAATAAT | 94  |
| GAATACA | 47  |
| GAATACC | 40  |
| GAATACG | 11  |
| GAATACT | 22  |
| GAATAGA | 47  |
| GAATAGC | 40  |
| GAATAGG | 25  |
| GAATAGT | 69  |
| GAATATA | 108 |
| GAATATC | 18  |
| GAATATG | 54  |
| GAATATT | 72  |
| GAATCAA | 83  |
| GAATCAC | 29  |
| GAATCAG | 54  |
| GAATCAT | 101 |
| GAATCCA | 65  |
| GAATCCC | 18  |
| GAATCCG | 32  |
| GAATCCT | 47  |
| GAATCGA | 36  |
| GAATCGC | 18  |
| GAATCGG | 25  |
| GAATCGT | 11  |
| GAATCTA | 61  |
| GAATCTC | 18  |
| GAATCTG | 51  |
| GAATCTT | 58  |
| GAATGAA | 47  |
| GAATGAC | 29  |
| GAATGAG | 22  |
| GAATGAT | 79  |
| GAATGCA | 58  |
| GAATGCC | 32  |

|         |     |
|---------|-----|
| GAATGCG | 25  |
| GAATGCT | 43  |
| GAATGGA | 101 |
| GAATGGC | 11  |
| GAATGGG | 54  |
| GAATGGT | 43  |
| GAATGTA | 32  |
| GAATGTC | 40  |
| GAATGTG | 51  |
| GAATGTT | 58  |
| GAATTAA | 61  |
| GAATTAC | 47  |
| GAATTAG | 36  |
| GAATTAT | 133 |
| GAATTCA | 101 |
| GAATTCC | 51  |
| GAATTCG | 29  |
| GAATTCT | 61  |
| GAATTGA | 69  |
| GAATTGC | 22  |
| GAATTGG | 65  |
| GAATTGT | 76  |
| GAATTTA | 51  |
| GAATTTC | 90  |
| GAATTTG | 97  |
| GAATTTT | 105 |
| GACAAAA | 148 |
| GACAAAC | 43  |
| GACAAAG | 65  |
| GACAAAT | 108 |
| GACAACA | 87  |
| GACAACC | 40  |
| GACAACG | 36  |
| GACAACT | 43  |
| GACAAGA | 69  |
| GACAAGC | 72  |
| GACAAGG | 47  |
| GACAAGT | 47  |
| GACAATA | 61  |
| GACAATC | 54  |
| GACAATG | 58  |
| GACAATT | 51  |
| GACACAA | 79  |
| GACACAC | 36  |
| GACACAG | 32  |
| GACACAT | 105 |
| GACACCA | 61  |
| GACACCC | 65  |
| GACACCG | 22  |
| GACACCT | 65  |
| GACACGA | 51  |
| GACACGC | 58  |

|         |     |
|---------|-----|
| GACACGG | 32  |
| GACACGT | 40  |
| GACACTA | 29  |
| GACACTC | 14  |
| GACACTG | 40  |
| GACACTT | 25  |
| GACAGAA | 40  |
| GACAGAC | 47  |
| GACAGAG | 25  |
| GACAGAT | 47  |
| GACAGCA | 36  |
| GACAGCC | 47  |
| GACAGCG | 54  |
| GACAGCT | 36  |
| GACAGGA | 29  |
| GACAGGC | 29  |
| GACAGGG | 43  |
| GACAGGT | 29  |
| GACAGTA | 25  |
| GACAGTC | 79  |
| GACAGTG | 65  |
| GACAGTT | 47  |
| GACATAA | 61  |
| GACATAC | 25  |
| GACATAG | 22  |
| GACATAT | 69  |
| GACATCA | 40  |
| GACATCC | 47  |
| GACATCG | 29  |
| GACATCT | 65  |
| GACATGA | 54  |
| GACATGC | 43  |
| GACATGG | 69  |
| GACATGT | 105 |
| GACATTA | 32  |
| GACATTC | 36  |
| GACATTG | 43  |
| GACATTT | 137 |
| GACCAAA | 94  |
| GACCAAC | 61  |
| GACCAAG | 43  |
| GACCAAT | 54  |
| GACCACA | 40  |
| GACCACC | 79  |
| GACCACG | 32  |
| GACCACT | 54  |
| GACCAGA | 32  |
| GACCAGC | 40  |
| GACCAGG | 36  |
| GACCAGT | 32  |
| GACCATA | 58  |
| GACCATC | 43  |

|         |    |
|---------|----|
| GACCATG | 51 |
| GACCATT | 43 |
| GACCCAA | 83 |
| GACCCAC | 29 |
| GACCCAG | 18 |
| GACCCAT | 43 |
| GACCCCA | 29 |
| GACCCCA | 29 |
| GACCCCC | 4  |
| GACCCCG | 32 |
| GACCCGA | 69 |
| GACCCGC | 29 |
| GACCCGG | 36 |
| GACCCGT | 40 |
| GACCCTA | 32 |
| GACCCTC | 36 |
| GACCCTG | 29 |
| GACCCTT | 43 |
| GACCGAA | 22 |
| GACCGAC | 40 |
| GACCGAG | 51 |
| GACCGAT | 43 |
| GACCGCA | 25 |
| GACCGCC | 61 |
| GACCGCG | 43 |
| GACCGCT | 29 |
| GACCGGA | 32 |
| GACCGGC | 40 |
| GACCGGG | 47 |
| GACCGGT | 36 |
| GACCGTA | 22 |
| GACCGTC | 36 |
| GACCGTG | 29 |
| GACCGTT | 87 |
| GACCTAA | 40 |
| GACCTAC | 32 |
| GACCTAG | 47 |
| GACCTAT | 61 |
| GACCTCA | 32 |
| GACCTCC | 40 |
| GACCTCG | 29 |
| GACCTCT | 40 |
| GACCTGA | 11 |
| GACCTGC | 51 |
| GACCTGG | 25 |
| GACCTGT | 29 |
| GACCTTA | 40 |
| GACCTTC | 43 |
| GACCTTG | 32 |
| GACCTTT | 76 |
| GACGAAA | 72 |
| GACGAAC | 36 |

|         |     |
|---------|-----|
| GACGAAG | 69  |
| GACGAAT | 36  |
| GACGACA | 83  |
| GACGACC | 58  |
| GACGACG | 141 |
| GACGACT | 51  |
| GACGAGA | 87  |
| GACGAGC | 40  |
| GACGAGG | 40  |
| GACGAGT | 61  |
| GACGATA | 32  |
| GACGATC | 18  |
| GACGATG | 61  |
| GACGATT | 29  |
| GACGCAA | 22  |
| GACGCAC | 32  |
| GACGCAG | 51  |
| GACGCAT | 25  |
| GACGCCA | 47  |
| GACGCCC | 43  |
| GACGCCG | 40  |
| GACGCCT | 22  |
| GACGCGA | 18  |
| GACGCGC | 29  |
| GACGCGG | 29  |
| GACGCGT | 18  |
| GACGCTA | 22  |
| GACGCTC | 25  |
| GACGCTG | 58  |
| GACGCTT | 11  |
| GACGGAA | 25  |
| GACGGAC | 72  |
| GACGGAG | 51  |
| GACGGAT | 47  |
| GACGGCA | 32  |
| GACGGCC | 58  |
| GACGGCG | 72  |
| GACGGCT | 22  |
| GACGGGA | 40  |
| GACGGGC | 29  |
| GACGGGG | 40  |
| GACGGGT | 18  |
| GACGGTA | 11  |
| GACGGTC | 155 |
| GACGGTG | 69  |
| GACGGTT | 36  |
| GACGTAA | 29  |
| GACGTAC | 32  |
| GACGTAG | 22  |
| GACGTAT | 22  |
| GACGTCA | 32  |
| GACGTCA | 32  |

|         |     |
|---------|-----|
| GACGTCG | 25  |
| GACGTCT | 29  |
| GACGTGA | 14  |
| GACGTGC | 51  |
| GACGTGG | 72  |
| GACGTGT | 32  |
| GACGTTA | 18  |
| GACGTTC | 47  |
| GACGTTG | 29  |
| GACGTTT | 36  |
| GACTAAA | 105 |
| GACTAAC | 61  |
| GACTAAG | 29  |
| GACTAAT | 54  |
| GACTACA | 54  |
| GACTACC | 22  |
| GACTACG | 25  |
| GACTACT | 29  |
| GACTAGA | 54  |
| GACTAGC | 47  |
| GACTAGG | 14  |
| GACTAGT | 32  |
| GACTATA | 43  |
| GACTATC | 32  |
| GACTATG | 40  |
| GACTATT | 83  |
| GACTCAA | 51  |
| GACTCAC | 14  |
| GACTCAG | 22  |
| GACTCAT | 65  |
| GACTCCA | 58  |
| GACTCCC | 25  |
| GACTCCG | 36  |
| GACTCCT | 51  |
| GACTCGA | 25  |
| GACTCGC | 40  |
| GACTCGG | 40  |
| GACTCGT | 29  |
| GACTCTA | 40  |
| GACTCTA | 40  |
| GACTCTC | 51  |
| GACTCTT | 76  |
| GACTGAA | 47  |
| GACTGAC | 36  |
| GACTGAG | 36  |
| GACTGAT | 54  |
| GACTGCA | 76  |
| GACTGCC | 43  |
| GACTGCG | 7   |
| GACTGCT | 61  |
| GACTGGA | 29  |
| GACTGGC | 40  |

|         |     |
|---------|-----|
| GACTGGG | 7   |
| GACTGGT | 40  |
| GACTGTA | 40  |
| GACTGTC | 76  |
| GACTGTG | 32  |
| GACTGTT | 72  |
| GACTTAA | 61  |
| GACTTAC | 22  |
| GACTTAG | 40  |
| GACTTAT | 54  |
| GACTTCA | 58  |
| GACTTCC | 54  |
| GACTTCG | 22  |
| GACTTCT | 65  |
| GACTTGA | 32  |
| GACTTGC | 40  |
| GACTTGG | 79  |
| GACTTGT | 87  |
| GACTTTA | 83  |
| GACTTTC | 32  |
| GACTTTG | 69  |
| GACTTTT | 58  |
| GAGAAAA | 195 |
| GAGAAAC | 90  |
| GAGAAAG | 97  |
| GAGAAAT | 87  |
| GAGAACA | 51  |
| GAGAACC | 43  |
| GAGAACG | 36  |
| GAGAACT | 54  |
| GAGAAGA | 115 |
| GAGAAGA | 115 |
| GAGAAGG | 79  |
| GAGAAGT | 65  |
| GAGAATA | 25  |
| GAGAATC | 65  |
| GAGAATG | 51  |
| GAGAATT | 97  |
| GAGACAA | 65  |
| GAGACAC | 54  |
| GAGACAG | 36  |
| GAGACAT | 51  |
| GAGACCA | 47  |
| GAGACCC | 43  |
| GAGACCG | 29  |
| GAGACCT | 29  |
| GAGACGA | 58  |
| GAGACGC | 29  |
| GAGACGG | 36  |
| GAGACGT | 51  |
| GAGACTA | 51  |
| GAGACTC | 36  |



|         |     |
|---------|-----|
| GAGACTG | 40  |
| GAGACTT | 65  |
| GAGAGAA | 144 |
| GAGAGAC | 43  |
| GAGAGAG | 274 |
| GAGAGAT | 101 |
| GAGAGCA | 79  |
| GAGAGCC | 79  |
| GAGAGCG | 79  |
| GAGAGCT | 69  |
| GAGAGGA | 123 |
| GAGAGGC | 58  |
| GAGAGGG | 162 |
| GAGAGGT | 43  |
| GAGAGTA | 61  |
| GAGAGTC | 58  |
| GAGAGTG | 76  |
| GAGAGTT | 54  |
| GAGATAA | 58  |
| GAGATAC | 43  |
| GAGATAG | 61  |
| GAGATAT | 94  |
| GAGATCA | 51  |
| GAGATCC | 65  |
| GAGATCG | 32  |
| GAGATCT | 58  |
| GAGATGA | 76  |
| GAGATGC | 76  |
| GAGATGG | 83  |
| GAGATGT | 83  |
| GAGATTA | 47  |
| GAGATTC | 54  |
| GAGATTG | 58  |
| GAGATTT | 69  |
| GAGCAAA | 105 |
| GAGCAAC | 51  |
| GAGCAAG | 83  |
| GAGCAAT | 69  |
| GAGCACA | 61  |
| GAGCACC | 76  |
| GAGCACG | 43  |
| GAGCACT | 47  |
| GAGCAGA | 29  |
| GAGCAGC | 108 |
| GAGCAGG | 36  |
| GAGCAGT | 32  |
| GAGCATA | 94  |
| GAGCATC | 51  |
| GAGCATG | 29  |
| GAGCATT | 18  |
| GAGCCAA | 126 |
| GAGCCAC | 69  |

|         |     |
|---------|-----|
| GAGCCAG | 94  |
| GAGCCAT | 76  |
| GAGCCCA | 83  |
| GAGCCCC | 40  |
| GAGCCCG | 61  |
| GAGCCCT | 61  |
| GAGCCGA | 43  |
| GAGCCGC | 40  |
| GAGCCGG | 32  |
| GAGCCGT | 40  |
| GAGCCTA | 51  |
| GAGCCTC | 69  |
| GAGCCTG | 54  |
| GAGCCTT | 61  |
| GAGCGAA | 36  |
| GAGCGAC | 51  |
| GAGCGAG | 76  |
| GAGCGAT | 36  |
| GAGCGCA | 32  |
| GAGCGCC | 47  |
| GAGCGCG | 43  |
| GAGCGCT | 18  |
| GAGCGGA | 69  |
| GAGCGGC | 51  |
| GAGCGGG | 29  |
| GAGCGGT | 36  |
| GAGCGTA | 18  |
| GAGCGTC | 18  |
| GAGCGTG | 58  |
| GAGCGTT | 11  |
| GAGCTAA | 72  |
| GAGCTAC | 43  |
| GAGCTAG | 76  |
| GAGCTAT | 119 |
| GAGCTCA | 87  |
| GAGCTCC | 105 |
| GAGCTCG | 61  |
| GAGCTCT | 83  |
| GAGCTGA | 72  |
| GAGCTGC | 58  |
| GAGCTGG | 69  |
| GAGCTGT | 47  |
| GAGCTTA | 29  |
| GAGCTTC | 54  |
| GAGCTTG | 47  |
| GAGCTTT | 94  |
| GAGGAAA | 115 |
| GAGGAAC | 58  |
| GAGGAAG | 162 |
| GAGGAAT | 47  |
| GAGGACA | 47  |
| GAGGACC | 29  |

|         |     |
|---------|-----|
| GAGGACG | 69  |
| GAGGACT | 29  |
| GAGGAGA | 148 |
| GAGGAGC | 87  |
| GAGGAGG | 137 |
| GAGGAGT | 94  |
| GAGGATA | 51  |
| GAGGATC | 32  |
| GAGGATG | 61  |
| GAGGATT | 94  |
| GAGGCAA | 58  |
| GAGGCAC | 58  |
| GAGGCAG | 72  |
| GAGGCAT | 54  |
| GAGGCCA | 69  |
| GAGGCCC | 58  |
| GAGGCCG | 43  |
| GAGGCCT | 36  |
| GAGGCGA | 25  |
| GAGGCGC | 61  |
| GAGGCGG | 47  |
| GAGGCGT | 29  |
| GAGGCTA | 36  |
| GAGGCTC | 43  |
| GAGGCTG | 58  |
| GAGGCTT | 36  |
| GAGGGAA | 65  |
| GAGGGAC | 69  |
| GAGGGAG | 105 |
| GAGGGAT | 43  |
| GAGGGCA | 54  |
| GAGGGCC | 69  |
| GAGGGCG | 51  |
| GAGGGCT | 47  |
| GAGGGGA | 72  |
| GAGGGGC | 47  |
| GAGGGGG | 87  |
| GAGGGGT | 72  |
| GAGGGTA | 25  |
| GAGGGTC | 51  |
| GAGGGTG | 29  |
| GAGGGTT | 47  |
| GAGGTAA | 22  |
| GAGGTAC | 18  |
| GAGGTAG | 43  |
| GAGGTAT | 25  |
| GAGGTCA | 36  |
| GAGGTCA | 36  |
| GAGGTCC | 40  |
| GAGGTCT | 22  |
| GAGGTGA | 58  |
| GAGGTGC | 40  |

|         |     |
|---------|-----|
| GAGGTGG | 108 |
| GAGGTGT | 51  |
| GAGGTTA | 36  |
| GAGGTTC | 43  |
| GAGGTTG | 76  |
| GAGGTTT | 61  |
| GAGTAAA | 90  |
| GAGTAAC | 40  |
| GAGTAAG | 51  |
| GAGTAAT | 61  |
| GAGTACA | 47  |
| GAGTACC | 47  |
| GAGTACG | 25  |
| GAGTACT | 36  |
| GAGTAGA | 69  |
| GAGTAGC | 40  |
| GAGTAGG | 83  |
| GAGTAGT | 22  |
| GAGTATA | 83  |
| GAGTATC | 22  |
| GAGTATG | 43  |
| GAGTATT | 72  |
| GAGTCAA | 40  |
| GAGTCAC | 14  |
| GAGTCAG | 22  |
| GAGTCAT | 61  |
| GAGTCCA | 54  |
| GAGTCCC | 25  |
| GAGTCCG | 54  |
| GAGTCCT | 18  |
| GAGTCGA | 32  |
| GAGTCGC | 32  |
| GAGTCGG | 36  |
| GAGTCGT | 43  |
| GAGTCTA | 36  |
| GAGTCTA | 36  |
| GAGTCTC | 32  |
| GAGTCTG | 54  |
| GAGTGAA | 58  |
| GAGTGAC | 47  |
| GAGTGAG | 76  |
| GAGTGAT | 58  |
| GAGTGCA | 43  |
| GAGTGCC | 47  |
| GAGTGCG | 36  |
| GAGTGCT | 51  |
| GAGTGGA | 65  |
| GAGTGGC | 18  |
| GAGTGGG | 43  |
| GAGTGGT | 61  |
| GAGTGTA | 58  |
| GAGTGTC | 83  |

|         |     |
|---------|-----|
| GAGTGTG | 51  |
| GAGTGTT | 61  |
| GAGTTAA | 51  |
| GAGTTAC | 25  |
| GAGTTAG | 32  |
| GAGTTAT | 29  |
| GAGTTCA | 79  |
| GAGTTCC | 32  |
| GAGTTCG | 32  |
| GAGTTCT | 51  |
| GAGTTGA | 69  |
| GAGTTGC | 61  |
| GAGTTGG | 51  |
| GAGTTGT | 76  |
| GAGTTTA | 72  |
| GAGTTTC | 58  |
| GAGTTTG | 87  |
| GAGTTTT | 108 |
| GATAAAA | 119 |
| GATAAAC | 32  |
| GATAAAG | 83  |
| GATAAAT | 101 |
| GATAACA | 51  |
| GATAACC | 36  |
| GATAACG | 25  |
| GATAACT | 43  |
| GATAAGA | 43  |
| GATAAGC | 43  |
| GATAAGG | 54  |
| GATAAGT | 43  |
| GATAATA | 72  |
| GATAATC | 32  |
| GATAATG | 61  |
| GATAATT | 69  |
| GATACAA | 69  |
| GATACAC | 40  |
| GATACAG | 36  |
| GATACAT | 72  |
| GATACCA | 32  |
| GATACCC | 18  |
| GATACCG | 22  |
| GATACCT | 25  |
| GATACGA | 43  |
| GATACGC | 25  |
| GATACGG | 18  |
| GATACGT | 18  |
| GATACTA | 61  |
| GATACTC | 43  |
| GATACTG | 40  |
| GATACTT | 47  |
| GATAGAA | 76  |
| GATAGAC | 40  |

|         |     |
|---------|-----|
| GATAGAG | 76  |
| GATAGAT | 54  |
| GATAGCA | 51  |
| GATAGCC | 29  |
| GATAGCG | 11  |
| GATAGCT | 51  |
| GATAGGA | 22  |
| GATAGGC | 4   |
| GATAGGG | 40  |
| GATAGGT | 32  |
| GATAGTA | 32  |
| GATAGTC | 36  |
| GATAGTG | 51  |
| GATAGTT | 51  |
| GATATAA | 94  |
| GATATAC | 18  |
| GATATAG | 79  |
| GATATAT | 148 |
| GATATCA | 36  |
| GATATCC | 25  |
| GATATCG | 51  |
| GATATCT | 54  |
| GATATGA | 65  |
| GATATGC | 69  |
| GATATGG | 61  |
| GATATGT | 65  |
| GATATTA | 79  |
| GATATTC | 47  |
| GATATTG | 54  |
| GATATTT | 166 |
| GATCAAA | 76  |
| GATCAAC | 76  |
| GATCAAG | 61  |
| GATCAAT | 51  |
| GATCACA | 43  |
| GATCACC | 72  |
| GATCACG | 22  |
| GATCACT | 47  |
| GATCAGA | 32  |
| GATCAGC | 36  |
| GATCAGG | 32  |
| GATCAGT | 40  |
| GATCATA | 119 |
| GATCATC | 51  |
| GATCATG | 87  |
| GATCATT | 54  |
| GATCCAA | 108 |
| GATCCAC | 43  |
| GATCCAG | 87  |
| GATCCAT | 105 |
| GATCCCA | 25  |
| GATCCCC | 51  |

|         |     |
|---------|-----|
| GATCCCG | 25  |
| GATCCCT | 72  |
| GATCCGA | 72  |
| GATCCGC | 40  |
| GATCCGG | 25  |
| GATCCGT | 43  |
| GATCCTA | 61  |
| GATCCTC | 65  |
| GATCCTG | 69  |
| GATCCTT | 51  |
| GATCGAA | 40  |
| GATCGAC | 36  |
| GATCGAG | 97  |
| GATCGAT | 79  |
| GATCGCA | 29  |
| GATCGCC | 25  |
| GATCGCG | 18  |
| GATCGCT | 29  |
| GATCGGA | 40  |
| GATCGGA | 40  |
| GATCGGC | 47  |
| GATCGGG | 36  |
| GATCGTA | 18  |
| GATCGTC | 14  |
| GATCGTG | 29  |
| GATCGTT | 54  |
| GATCTAA | 54  |
| GATCTAC | 54  |
| GATCTAG | 72  |
| GATCTAT | 83  |
| GATCTCA | 72  |
| GATCTCC | 76  |
| GATCTCG | 69  |
| GATCTCT | 61  |
| GATCTGA | 47  |
| GATCTGC | 51  |
| GATCTGG | 40  |
| GATCTGT | 58  |
| GATCTTA | 51  |
| GATCTTC | 69  |
| GATCTTG | 79  |
| GATCTTT | 105 |
| GATGAAA | 87  |
| GATGAAA | 87  |
| GATGAAC | 97  |
| GATGAAT | 69  |
| GATGACA | 79  |
| GATGACC | 40  |
| GATGACG | 40  |
| GATGACT | 61  |
| GATGAGA | 101 |
| GATGAGC | 69  |

|         |     |
|---------|-----|
| GATGAGG | 51  |
| GATGAGT | 65  |
| GATGATA | 105 |
| GATGATC | 76  |
| GATGATG | 90  |
| GATGATT | 87  |
| GATGCAA | 47  |
| GATGCAC | 69  |
| GATGCAG | 47  |
| GATGCAT | 83  |
| GATGCCA | 61  |
| GATGCCC | 51  |
| GATGCCG | 29  |
| GATGCCT | 83  |
| GATGCGA | 22  |
| GATGCGC | 29  |
| GATGCGG | 36  |
| GATGCGT | 51  |
| GATGCTA | 58  |
| GATGCTC | 61  |
| GATGCTG | 22  |
| GATGCTT | 47  |
| GATGGAA | 51  |
| GATGGAC | 54  |
| GATGGAG | 105 |
| GATGGAT | 65  |
| GATGGCA | 72  |
| GATGGCC | 58  |
| GATGGCG | 40  |
| GATGGCT | 32  |
| GATGGGA | 58  |
| GATGGGC | 61  |
| GATGGGG | 29  |
| GATGGGT | 69  |
| GATGGTA | 61  |
| GATGGTC | 36  |
| GATGGTG | 94  |
| GATGGTT | 36  |
| GATGTAA | 65  |
| GATGTAC | 47  |
| GATGTAG | 47  |
| GATGTAT | 61  |
| GATGTCA | 65  |
| GATGTCC | 29  |
| GATGTCG | 43  |
| GATGTCT | 87  |
| GATGTGA | 83  |
| GATGTGC | 83  |
| GATGTGG | 61  |
| GATGTGT | 61  |
| GATGTTA | 61  |
| GATGTTC | 43  |



|          |     |
|----------|-----|
| GATGTTG  | 72  |
| GATGTTT  | 83  |
| GATTA AA | 83  |
| GATTAAC  | 43  |
| GATTAAG  | 58  |
| GATTAAT  | 97  |
| GATTACA  | 58  |
| GATTACC  | 54  |
| GATTACG  | 22  |
| GATTA CT | 43  |
| GATTAGA  | 54  |
| GATTAGC  | 40  |
| GATTAGG  | 29  |
| GATTAGT  | 43  |
| GATTATA  | 119 |
| GATTATC  | 47  |
| GATTATG  | 69  |
| GATTATT  | 87  |
| GATTCAA  | 69  |
| GATTCAC  | 61  |
| GATTCAG  | 32  |
| GATTCAT  | 94  |
| GATTCCA  | 51  |
| GATTCCC  | 29  |
| GATTCCG  | 18  |
| GATTCCT  | 58  |
| GATTCGA  | 61  |
| GATTCGC  | 25  |
| GATTCGG  | 22  |
| GATTCGT  | 32  |
| GATTCTA  | 51  |
| GATTCTC  | 51  |
| GATTCTG  | 22  |
| GATTCTT  | 101 |
| GATTGAA  | 65  |
| GATTGAC  | 29  |
| GATTGAG  | 69  |
| GATTGAT  | 108 |
| GATTGCA  | 65  |
| GATTGCC  | 47  |
| GATTGCG  | 18  |
| GATTGCT  | 58  |
| GATTGGA  | 58  |
| GATTGGC  | 32  |
| GATTGGG  | 29  |
| GATTGGT  | 69  |
| GATTGTA  | 54  |
| GATTGTC  | 43  |
| GATTGTG  | 47  |
| GATTGTT  | 83  |
| GATTTAA  | 79  |
| GATTTAC  | 29  |

|          |     |
|----------|-----|
| GATTTAG  | 90  |
| GATTTAT  | 101 |
| GATTTCA  | 51  |
| GATTTCC  | 51  |
| GATTTCCG | 29  |
| GATTTCT  | 83  |
| GATTTGA  | 126 |
| GATTTGC  | 94  |
| GATTTGG  | 101 |
| GATTTGT  | 108 |
| GATTTTA  | 108 |
| GATTTTC  | 79  |
| GATTTTG  | 115 |
| GATTTTT  | 209 |
| GCAAAAA  | 155 |
| GCAAAAC  | 72  |
| GCAAAAG  | 72  |
| GCAAAAT  | 105 |
| GCAAACA  | 101 |
| GCAAACC  | 65  |
| GCAAACG  | 40  |
| GCAAACT  | 97  |
| GCAAAGA  | 112 |
| GCAAAGC  | 51  |
| GCAAAGG  | 76  |
| GCAAAGT  | 69  |
| GCAAATA  | 108 |
| GCAAATC  | 69  |
| GCAAATG  | 61  |
| GCAAATT  | 94  |
| GCAACAA  | 94  |
| GCAACAC  | 58  |
| GCAACAG  | 72  |
| GCAACAT  | 69  |
| GCAACCA  | 72  |
| GCAACCC  | 65  |
| GCAACCG  | 47  |
| GCAACCT  | 47  |
| GCAACGA  | 51  |
| GCAACGC  | 94  |
| GCAACGG  | 47  |
| GCAACGT  | 43  |
| GCAACTA  | 65  |
| GCAACTC  | 43  |
| GCAACTG  | 51  |
| GCAACTT  | 94  |
| GCAAGAA  | 83  |
| GCAAGAC  | 32  |
| GCAAGAG  | 119 |
| GCAAGAT  | 54  |
| GCAAGCA  | 112 |
| GCAAGCC  | 58  |

|          |     |
|----------|-----|
| GCAAGCG  | 54  |
| GCAAGCT  | 58  |
| GCAAGGA  | 76  |
| GCAAGGC  | 72  |
| GCAAGGG  | 65  |
| GCAAGGT  | 54  |
| GCAAGTA  | 72  |
| GCAAGTC  | 47  |
| GCAAGTG  | 47  |
| GCAAGTT  | 65  |
| GCAATAA  | 69  |
| GCAATAC  | 22  |
| GCAATAG  | 14  |
| GCAATAT  | 65  |
| GCAATCA  | 79  |
| GCAATCC  | 47  |
| GCAATCG  | 47  |
| GCAATCT  | 72  |
| GCAATGA  | 72  |
| GCAATGC  | 61  |
| GCAATGG  | 29  |
| GCAATGT  | 22  |
| GCAATTA  | 25  |
| GCAATTA  | 25  |
| GCAATTG  | 40  |
| GCAATTT  | 51  |
| GCACAAA  | 83  |
| GCACAAC  | 69  |
| GCACAAG  | 72  |
| GCACAAT  | 40  |
| GCACACA  | 137 |
| GCACACC  | 65  |
| GCACACG  | 61  |
| GCACACT  | 51  |
| GCACAGA  | 36  |
| GCACAGC  | 69  |
| GCACAGG  | 40  |
| GCACAGT  | 14  |
| GCACATA  | 69  |
| GCACATC  | 25  |
| GCACATG  | 105 |
| GCACATT  | 47  |
| GCACCAA  | 69  |
| GCACCAC  | 58  |
| GCACCAG  | 87  |
| GCACCAT  | 32  |
| GCACCCA  | 61  |
| GCACCCC  | 61  |
| GCACCCG  | 58  |
| GCACCCCT | 32  |
| GCACCGA  | 83  |
| GCACCGC  | 54  |

|         |     |
|---------|-----|
| GCACCGG | 133 |
| GCACCGT | 14  |
| GCACCTA | 43  |
| GCACCTC | 40  |
| GCACCTG | 58  |
| GCACCTT | 29  |
| GCACGAA | 47  |
| GCACGAC | 36  |
| GCACGAG | 43  |
| GCACGAT | 25  |
| GCACGCA | 69  |
| GCACGCC | 54  |
| GCACGCG | 43  |
| GCACGCT | 51  |
| GCACGGA | 36  |
| GCACGGC | 65  |
| GCACGGG | 65  |
| GCACGGT | 43  |
| GCACGTA | 40  |
| GCACGTC | 83  |
| GCACGTG | 43  |
| GCACGTT | 32  |
| GCACTAA | 40  |
| GCACTAC | 47  |
| GCACTAG | 47  |
| GCACTAT | 32  |
| GCACTCA | 43  |
| GCACTCC | 58  |
| GCACTCG | 47  |
| GCACTCT | 40  |
| GCACTGA | 51  |
| GCACTGC | 47  |
| GCACTGG | 40  |
| GCACTGT | 72  |
| GCACTTA | 43  |
| GCACTTC | 47  |
| GCACTTG | 69  |
| GCACTTT | 51  |
| GCAGAAA | 61  |
| GCAGAAA | 61  |
| GCAGAAC | 25  |
| GCAGAAG | 25  |
| GCAGACA | 32  |
| GCAGACC | 47  |
| GCAGACG | 54  |
| GCAGACT | 32  |
| GCAGAGA | 58  |
| GCAGAGC | 51  |
| GCAGAGG | 61  |
| GCAGAGT | 43  |
| GCAGATA | 47  |
| GCAGATC | 43  |

|         |     |
|---------|-----|
| GCAGATG | 47  |
| GCAGATT | 51  |
| GCAGCAA | 101 |
| GCAGCAC | 54  |
| GCAGCAG | 152 |
| GCAGCAT | 76  |
| GCAGCCA | 69  |
| GCAGCCC | 51  |
| GCAGCCG | 83  |
| GCAGCCT | 36  |
| GCAGCGA | 54  |
| GCAGCGC | 65  |
| GCAGCGG | 65  |
| GCAGCGT | 7   |
| GCAGCTA | 79  |
| GCAGCTC | 65  |
| GCAGCTG | 51  |
| GCAGCTT | 25  |
| GCAGGAA | 51  |
| GCAGGAC | 51  |
| GCAGGAG | 72  |
| GCAGGAT | 22  |
| GCAGGCA | 61  |
| GCAGGCC | 47  |
| GCAGGCG | 65  |
| GCAGGCT | 58  |
| GCAGGGA | 40  |
| GCAGGGC | 47  |
| GCAGGGG | 25  |
| GCAGGGT | 32  |
| GCAGGTA | 36  |
| GCAGGTC | 58  |
| GCAGGTG | 51  |
| GCAGGTT | 18  |
| GCAGTAA | 32  |
| GCAGTAC | 25  |
| GCAGTAG | 54  |
| GCAGTAT | 29  |
| GCAGTCA | 22  |
| GCAGTCC | 43  |
| GCAGTCG | 36  |
| GCAGTCT | 43  |
| GCAGTGA | 54  |
| GCAGTGC | 54  |
| GCAGTGG | 47  |
| GCAGTGT | 40  |
| GCAGTTA | 11  |
| GCAGTTC | 36  |
| GCAGTTG | 47  |
| GCAGTTT | 36  |
| GCATAAA | 90  |
| GCATAAC | 32  |

|         |     |
|---------|-----|
| GCATAAG | 51  |
| GCATAAT | 43  |
| GCATACA | 65  |
| GCATACC | 69  |
| GCATACG | 18  |
| GCATACT | 51  |
| GCATAGA | 61  |
| GCATAGC | 11  |
| GCATAGG | 51  |
| GCATAGT | 32  |
| GCATATA | 123 |
| GCATATC | 69  |
| GCATATG | 69  |
| GCATATT | 54  |
| GCATCAA | 51  |
| GCATCAC | 61  |
| GCATCAG | 72  |
| GCATCAT | 87  |
| GCATCCA | 72  |
| GCATCCC | 40  |
| GCATCCG | 25  |
| GCATCCT | 65  |
| GCATCGA | 36  |
| GCATCGC | 40  |
| GCATCGG | 11  |
| GCATCGT | 29  |
| GCATCTA | 69  |
| GCATCTC | 87  |
| GCATCTG | 40  |
| GCATCTT | 65  |
| GCATGAA | 58  |
| GCATGAC | 90  |
| GCATGAG | 58  |
| GCATGAT | 79  |
| GCATGCA | 209 |
| GCATGCC | 105 |
| GCATGCG | 69  |
| GCATGCT | 83  |
| GCATGGA | 101 |
| GCATGGC | 58  |
| GCATGGG | 72  |
| GCATGGT | 69  |
| GCATGTA | 94  |
| GCATGTC | 40  |
| GCATGTG | 90  |
| GCATGTT | 58  |
| GCATTAA | 76  |
| GCATTAC | 40  |
| GCATTAG | 25  |
| GCATTAT | 83  |
| GCATTCA | 51  |
| GCATTCC | 36  |

|         |     |
|---------|-----|
| GCATTCG | 32  |
| GCATTCT | 40  |
| GCATTGA | 54  |
| GCATTGC | 72  |
| GCATTGG | 51  |
| GCATTGT | 61  |
| GCATTTA | 97  |
| GCATTTT | 54  |
| GCATTTG | 79  |
| GCATTTT | 141 |
| GCCAAAA | 137 |
| GCCAAAC | 72  |
| GCCAAAG | 72  |
| GCCAAAT | 69  |
| GCCAACA | 69  |
| GCCAACC | 54  |
| GCCAACG | 87  |
| GCCAACT | 51  |
| GCCAAGA | 90  |
| GCCAAGA | 90  |
| GCCAAGC | 112 |
| GCCAAGT | 32  |
| GCCAATA | 83  |
| GCCAATC | 51  |
| GCCAATG | 40  |
| GCCAATT | 54  |
| GCCACAA | 79  |
| GCCACAC | 76  |
| GCCACAG | 51  |
| GCCACAT | 51  |
| GCCACCA | 144 |
| GCCACCC | 54  |
| GCCACCG | 69  |
| GCCACCT | 87  |
| GCCACGA | 29  |
| GCCACGC | 87  |
| GCCACGG | 29  |
| GCCACGT | 72  |
| GCCACTA | 40  |
| GCCACTC | 40  |
| GCCACTG | 54  |
| GCCACTT | 83  |
| GCCAGAA | 76  |
| GCCAGAC | 32  |
| GCCAGAG | 54  |
| GCCAGAT | 61  |
| GCCAGCA | 65  |
| GCCAGCC | 148 |
| GCCAGCG | 43  |
| GCCAGCT | 83  |
| GCCAGGA | 54  |
| GCCAGGC | 47  |

|         |     |
|---------|-----|
| GCCAGGG | 54  |
| GCCAGGT | 43  |
| GCCAGTA | 25  |
| GCCAGTC | 51  |
| GCCAGTG | 36  |
| GCCAGTT | 40  |
| GCCATAA | 29  |
| GCCATAC | 32  |
| GCCATAG | 47  |
| GCCATAT | 54  |
| GCCATCA | 65  |
| GCCATCC | 51  |
| GCCATCG | 54  |
| GCCATCT | 94  |
| GCCATGA | 58  |
| GCCATGC | 79  |
| GCCATGG | 47  |
| GCCATGT | 90  |
| GCCATTA | 61  |
| GCCATTC | 32  |
| GCCATTG | 69  |
| GCCATTT | 87  |
| GCCCAAA | 94  |
| GCCCAAC | 61  |
| GCCCAAG | 90  |
| GCCCAAT | 29  |
| GCCCACA | 54  |
| GCCCACC | 76  |
| GCCCACG | 72  |
| GCCCACT | 65  |
| GCCCAGA | 54  |
| GCCCAGC | 51  |
| GCCCAGG | 40  |
| GCCCAGT | 36  |
| GCCCATA | 36  |
| GCCCATC | 58  |
| GCCCATG | 83  |
| GCCCATT | 69  |
| GCCCCAA | 69  |
| GCCCCAA | 69  |
| GCCCCAG | 40  |
| GCCCCAT | 32  |
| GCCCCCA | 123 |
| GCCCCCC | 36  |
| GCCCCCG | 90  |
| GCCCCCT | 47  |
| GCCCCGA | 32  |
| GCCCCGC | 40  |
| GCCCCGG | 43  |
| GCCCCGT | 51  |
| GCCCCTA | 22  |
| GCCCCTC | 79  |



|         |     |
|---------|-----|
| GCCCCTG | 58  |
| GCCCCTT | 51  |
| GCCCGAA | 40  |
| GCCCGAC | 40  |
| GCCCGAG | 58  |
| GCCCGAT | 22  |
| GCCCGCA | 36  |
| GCCCGCC | 97  |
| GCCCGCG | 79  |
| GCCCGCT | 61  |
| GCCCGGA | 29  |
| GCCCGGC | 83  |
| GCCCGGG | 43  |
| GCCCGGT | 47  |
| GCCCGTA | 18  |
| GCCCGTC | 40  |
| GCCCGTG | 51  |
| GCCCGTT | 54  |
| GCCCTAA | 58  |
| GCCCTAC | 11  |
| GCCCTAG | 51  |
| GCCCTAT | 40  |
| GCCCTCA | 29  |
| GCCCTCC | 83  |
| GCCCTCG | 29  |
| GCCCTCT | 119 |
| GCCCTGA | 32  |
| GCCCTGC | 69  |
| GCCCTGG | 79  |
| GCCCTGT | 40  |
| GCCCTTA | 51  |
| GCCCTTC | 61  |
| GCCCTTG | 58  |
| GCCCTTT | 61  |
| GCCGAAA | 58  |
| GCCGAAC | 40  |
| GCCGAAG | 40  |
| GCCGAAT | 47  |
| GCCGACA | 18  |
| GCCGACC | 47  |
| GCCGACG | 58  |
| GCCGACT | 4   |
| GCCGAGA | 54  |
| GCCGAGC | 51  |
| GCCGAGG | 47  |
| GCCGAGT | 83  |
| GCCGATA | 18  |
| GCCGATC | 47  |
| GCCGATG | 40  |
| GCCGATT | 29  |
| GCCGCAA | 51  |
| GCCGCAC | 61  |



|         |    |
|---------|----|
| GCCTACG | 14 |
| GCCTACT | 51 |
| GCCTAGA | 54 |
| GCCTAGC | 32 |
| GCCTAGG | 54 |
| GCCTAGT | 25 |
| GCCTATA | 47 |
| GCCTATC | 29 |
| GCCTATG | 69 |
| GCCTATT | 47 |
| GCCTCAA | 61 |
| GCCTCAC | 65 |
| GCCTCAG | 51 |
| GCCTCAT | 58 |
| GCCTCCA | 79 |
| GCCTCCC | 58 |
| GCCTCCG | 29 |
| GCCTCCT | 76 |
| GCCTCGA | 25 |
| GCCTCGC | 72 |
| GCCTCGG | 36 |
| GCCTCGT | 54 |
| GCCTCTA | 25 |
| GCCTCTC | 94 |
| GCCTCTG | 54 |
| GCCTCTT | 58 |
| GCCTGAA | 25 |
| GCCTGAC | 36 |
| GCCTGAG | 47 |
| GCCTGAT | 36 |
| GCCTGCA | 79 |
| GCCTGCC | 72 |
| GCCTGCG | 43 |
| GCCTGCT | 76 |
| GCCTGGA | 54 |
| GCCTGGC | 61 |
| GCCTGGG | 40 |
| GCCTGGT | 36 |
| GCCTGTA | 43 |
| GCCTGTC | 40 |
| GCCTGTG | 61 |
| GCCTGTT | 40 |
| GCCTTAA | 22 |
| GCCTTAC | 7  |
| GCCTTAG | 25 |
| GCCTTAT | 40 |
| GCCTTCA | 43 |
| GCCTTCC | 69 |
| GCCTTCG | 54 |
| GCCTTCT | 65 |
| GCCTTGA | 54 |
| GCCTTGC | 72 |

|         |     |
|---------|-----|
| GCCTTGG | 65  |
| GCCTTGT | 65  |
| GCCTTTA | 51  |
| GCCTTTC | 58  |
| GCCTTTG | 72  |
| GCCTTTT | 105 |
| GCGAAAA | 58  |
| GCGAAAC | 65  |
| GCGAAAG | 36  |
| GCGAAAT | 18  |
| GCGAACA | 32  |
| GCGAACC | 32  |
| GCGAACG | 22  |
| GCGAACT | 32  |
| GCGAAGA | 54  |
| GCGAAGA | 54  |
| GCGAAGC | 54  |
| GCGAAGG | 43  |
| GCGAATA | 25  |
| GCGAATC | 18  |
| GCGAATG | 18  |
| GCGAATT | 22  |
| GCGACAA | 54  |
| GCGACAC | 32  |
| GCGACAG | 32  |
| GCGACAT | 29  |
| GCGACCA | 22  |
| GCGACCC | 54  |
| GCGACCG | 40  |
| GCGACCT | 43  |
| GCGACGA | 47  |
| GCGACGC | 43  |
| GCGACGG | 36  |
| GCGACGT | 43  |
| GCGACTA | 29  |
| GCGACTC | 40  |
| GCGACTG | 25  |
| GCGACTT | 54  |
| GCGAGAA | 47  |
| GCGAGAC | 40  |
| GCGAGAG | 47  |
| GCGAGAT | 29  |
| GCGAGCA | 36  |
| GCGAGCC | 79  |
| GCGAGCG | 47  |
| GCGAGCT | 40  |
| GCGAGGA | 51  |
| GCGAGGC | 69  |
| GCGAGGG | 36  |
| GCGAGGT | 22  |
| GCGAGTA | 40  |
| GCGAGTC | 11  |

|         |    |
|---------|----|
| GCGAGTG | 43 |
| GCGAGTT | 22 |
| GCGATAA | 18 |
| GCGATAC | 7  |
| GCGATAG | 11 |
| GCGATAT | 11 |
| GCGATCA | 25 |
| GCGATCC | 54 |
| GCGATCG | 32 |
| GCGATCT | 40 |
| GCGATGA | 43 |
| GCGATGC | 25 |
| GCGATGG | 40 |
| GCGATGT | 22 |
| GCGATTA | 29 |
| GCGATTC | 25 |
| GCGATTG | 25 |
| GCGATTT | 40 |
| GCGCAAA | 43 |
| GCGCAAC | 36 |
| GCGCAAG | 32 |
| GCGCAAT | 29 |
| GCGCACA | 40 |
| GCGCACC | 51 |
| GCGCACG | 51 |
| GCGCACT | 14 |
| GCGCAGA | 43 |
| GCGCAGC | 43 |
| GCGCAGG | 65 |
| GCGCAGT | 25 |
| GCGCATA | 18 |
| GCGCATC | 29 |
| GCGCATG | 43 |
| GCGCATT | 25 |
| GCGCCAA | 94 |
| GCGCCAA | 94 |
| GCGCCAC | 58 |
| GCGCCAT | 72 |
| GCGCCCA | 51 |
| GCGCCCC | 47 |
| GCGCCCG | 76 |
| GCGCCCT | 25 |
| GCGCCGA | 54 |
| GCGCCGC | 69 |
| GCGCCGG | 43 |
| GCGCCGT | 18 |
| GCGCCTA | 22 |
| GCGCCTC | 72 |
| GCGCCTG | 72 |
| GCGCCTT | 40 |
| GCGCGAA | 25 |
| GCGCGAC | 36 |

|         |     |
|---------|-----|
| GCGCGAG | 51  |
| GCGCGAT | 18  |
| GCGCGCA | 83  |
| GCGCGCC | 97  |
| GCGCGCG | 195 |
| GCGCGCT | 61  |
| GCGCGGA | 69  |
| GCGCGGC | 47  |
| GCGCGGG | 61  |
| GCGCGGT | 22  |
| GCGCGTA | 11  |
| GCGCGTC | 32  |
| GCGCGTG | 94  |
| GCGCGTT | 18  |
| GCGCTAA | 14  |
| GCGCTAC | 29  |
| GCGCTAG | 51  |
| GCGCTAT | 36  |
| GCGCTCA | 29  |
| GCGCTCC | 43  |
| GCGCTCG | 29  |
| GCGCTCT | 22  |
| GCGCTGA | 22  |
| GCGCTGC | 32  |
| GCGCTGG | 76  |
| GCGCTGT | 43  |
| GCGCTTA | 11  |
| GCGCTTC | 25  |
| GCGCTTG | 47  |
| GCGCTTT | 29  |
| GCGGAAA | 29  |
| GCGGAAC | 4   |
| GCGGAAG | 22  |
| GCGGAAT | 18  |
| GCGGACA | 32  |
| GCGGACC | 22  |
| GCGGACG | 61  |
| GCGGACT | 36  |
| GCGGAGA | 54  |
| GCGGAGC | 72  |
| GCGGAGG | 87  |
| GCGGAGT | 47  |
| GCGGATA | 14  |
| GCGGATC | 32  |
| GCGGATG | 54  |
| GCGGATT | 40  |
| GCGGCAA | 58  |
| GCGGCAC | 69  |
| GCGGCAG | 65  |
| GCGGCAT | 47  |
| GCGGCCA | 54  |
| GCGGCCC | 69  |

|         |    |
|---------|----|
| GCGGCCG | 76 |
| GCGGCCT | 47 |
| GCGGCGA | 54 |
| GCGGCGC | 36 |
| GCGGCGG | 43 |
| GCGGCGT | 51 |
| GCGGCTA | 43 |
| GCGGCTC | 29 |
| GCGGCTG | 58 |
| GCGGCTT | 40 |
| GCGGGAA | 22 |
| GCGGGAC | 25 |
| GCGGGAG | 29 |
| GCGGGAT | 11 |
| GCGGGCA | 32 |
| GCGGGCC | 54 |
| GCGGGCG | 72 |
| GCGGGCT | 29 |
| GCGGGGA | 29 |
| GCGGGGC | 22 |
| GCGGGGG | 51 |
| GCGGGGT | 29 |
| GCGGGTA | 25 |
| GCGGGTC | 22 |
| GCGGGTG | 65 |
| GCGGGTT | 7  |
| GCGGTAA | 18 |
| GCGGTAC | 25 |
| GCGGTAG | 18 |
| GCGGTAT | 22 |
| GCGGTCA | 36 |
| GCGGTCC | 40 |
| GCGGTCG | 29 |
| GCGGTCT | 32 |
| GCGGTGA | 22 |
| GCGGTGC | 40 |
| GCGGTGG | 72 |
| GCGGTGT | 22 |
| GCGGTTA | 29 |
| GCGGTTC | 7  |
| GCGGTTG | 36 |
| GCGGTTT | 40 |
| GCGTAAA | 29 |
| GCGTAAC | 4  |
| GCGTAAG | 14 |
| GCGTAAT | 7  |
| GCGTACA | 4  |
| GCGTACC | 25 |
| GCGTACG | 54 |
| GCGTACT | 18 |
| GCGTAGA | 14 |
| GCGTAGC | 22 |

|         |    |
|---------|----|
| GCGTAGG | 18 |
| GCGTAGT | 4  |
| GCGTATA | 32 |
| GCGTATC | 14 |
| GCGTATG | 7  |
| GCGTATT | 18 |
| GCGTCAA | 4  |
| GCGTCAC | 51 |
| GCGTCAG | 47 |
| GCGTCAT | 29 |
| GCGTCCA | 36 |
| GCGTCCC | 36 |
| GCGTCCG | 43 |
| GCGTCCT | 43 |
| GCGTCGA | 54 |
| GCGTCGG | 36 |
| GCGTCGT | 47 |
| GCGTCTA | 14 |
| GCGTCTC | 29 |
| GCGTCTG | 47 |
| GCGTCTT | 40 |
| GCGTGAA | 22 |
| GCGTGAC | 22 |
| GCGTGAG | 36 |
| GCGTGAT | 47 |
| GCGTGCA | 72 |
| GCGTGCC | 47 |
| GCGTGCG | 94 |
| GCGTGCT | 47 |
| GCGTGGA | 58 |
| GCGTGGC | 51 |
| GCGTGGG | 69 |
| GCGTGGT | 29 |
| GCGTGTA | 47 |
| GCGTGTC | 32 |
| GCGTGTG | 87 |
| GCGTGTT | 36 |
| GCGTTAA | 7  |
| GCGTTAC | 11 |
| GCGTTAG | 22 |
| GCGTTAT | 4  |
| GCGTTCA | 29 |
| GCGTTCC | 14 |
| GCGTTCG | 29 |
| GCGTTCT | 7  |
| GCGTTGA | 14 |
| GCGTTGC | 51 |
| GCGTTGG | 32 |
| GCGTTGT | 11 |
| GCGTTTA | 25 |
| GCGTTTC | 54 |
| GCGTTTG | 58 |



|         |     |
|---------|-----|
| GCGTTTT | 36  |
| GCTAAAA | 152 |
| GCTAAAC | 87  |
| GCTAAAG | 72  |
| GCTAAAT | 61  |
| GCTAACA | 105 |
| GCTAACC | 14  |
| GCTAACG | 40  |
| GCTAACT | 76  |
| GCTAAGA | 40  |
| GCTAAGC | 25  |
| GCTAAGG | 22  |
| GCTAAGT | 36  |
| GCTAATA | 65  |
| GCTAATC | 32  |
| GCTAATG | 43  |
| GCTAATT | 65  |
| GCTACAA | 61  |
| GCTACAC | 47  |
| GCTACAG | 51  |
| GCTACAT | 58  |
| GCTACCA | 76  |
| GCTACCC | 18  |
| GCTACCG | 14  |
| GCTACCT | 47  |
| GCTACGA | 22  |
| GCTACGC | 11  |
| GCTACGG | 43  |
| GCTACGT | 47  |
| GCTACTA | 72  |
| GCTACTC | 36  |
| GCTACTG | 36  |
| GCTACTT | 54  |
| GCTAGAA | 61  |
| GCTAGAC | 25  |
| GCTAGAG | 54  |
| GCTAGAT | 72  |
| GCTAGCA | 83  |
| GCTAGCC | 105 |
| GCTAGCG | 58  |
| GCTAGCT | 198 |
| GCTAGGA | 61  |
| GCTAGGC | 54  |
| GCTAGGG | 32  |
| GCTAGGT | 18  |
| GCTAGTA | 43  |
| GCTAGTC | 65  |
| GCTAGTG | 65  |
| GCTAGTT | 65  |
| GCTATAA | 112 |
| GCTATAC | 43  |
| GCTATAG | 83  |

|         |     |
|---------|-----|
| GCTATAT | 148 |
| GCTATCA | 40  |
| GCTATCC | 18  |
| GCTATCG | 22  |
| GCTATCT | 65  |
| GCTATGA | 58  |
| GCTATGC | 32  |
| GCTATGG | 58  |
| GCTATGT | 47  |
| GCTATTA | 51  |
| GCTATTA | 51  |
| GCTATTC | 51  |
| GCTATTT | 72  |
| GCTCAAA | 76  |
| GCTCAAC | 76  |
| GCTCAAG | 58  |
| GCTCAAT | 61  |
| GCTCACA | 65  |
| GCTCACC | 36  |
| GCTCACG | 65  |
| GCTCACT | 47  |
| GCTCAGA | 22  |
| GCTCAGC | 65  |
| GCTCAGG | 36  |
| GCTCAGT | 43  |
| GCTCATA | 40  |
| GCTCATC | 54  |
| GCTCATG | 83  |
| GCTCATT | 87  |
| GCTCCAA | 79  |
| GCTCCAC | 58  |
| GCTCCAG | 51  |
| GCTCCAT | 79  |
| GCTCCCA | 97  |
| GCTCCCC | 79  |
| GCTCCCG | 51  |
| GCTCCCT | 61  |
| GCTCCGA | 32  |
| GCTCCGC | 47  |
| GCTCCGG | 43  |
| GCTCCGT | 29  |
| GCTCCTA | 40  |
| GCTCCTC | 137 |
| GCTCCTG | 54  |
| GCTCCTT | 87  |
| GCTCGAA | 25  |
| GCTCGAC | 54  |
| GCTCGAG | 47  |
| GCTCGAT | 61  |
| GCTCGCA | 54  |
| GCTCGCA | 54  |
| GCTCGCG | 72  |

|         |     |
|---------|-----|
| GCTCGCT | 61  |
| GCTCGGA | 47  |
| GCTCGGC | 65  |
| GCTCGGG | 47  |
| GCTCGGT | 47  |
| GCTCGTA | 22  |
| GCTCGTC | 65  |
| GCTCGTG | 22  |
| GCTCGTT | 65  |
| GCTCTAA | 32  |
| GCTCTAC | 40  |
| GCTCTAG | 54  |
| GCTCTAT | 69  |
| GCTCTCA | 87  |
| GCTCTCC | 87  |
| GCTCTCG | 51  |
| GCTCTCT | 76  |
| GCTCTGA | 22  |
| GCTCTGC | 101 |
| GCTCTGG | 25  |
| GCTCTGT | 51  |
| GCTCTTA | 51  |
| GCTCTTC | 79  |
| GCTCTTG | 90  |
| GCTCTTT | 65  |
| GCTGAAA | 65  |
| GCTGAAC | 40  |
| GCTGAAG | 36  |
| GCTGAAT | 40  |
| GCTGACA | 40  |
| GCTGACC | 61  |
| GCTGACG | 40  |
| GCTGACT | 32  |
| GCTGAGA | 47  |
| GCTGAGC | 94  |
| GCTGAGG | 36  |
| GCTGAGT | 32  |
| GCTGATA | 32  |
| GCTGATC | 29  |
| GCTGATG | 51  |
| GCTGATT | 51  |
| GCTGCAA | 65  |
| GCTGCAC | 61  |
| GCTGCAG | 43  |
| GCTGCAT | 40  |
| GCTGCCA | 40  |
| GCTGCCC | 47  |
| GCTGCCG | 79  |
| GCTGCCT | 105 |
| GCTGCGA | 47  |
| GCTGCGC | 43  |
| GCTGCGG | 25  |

|          |    |
|----------|----|
| GCTGCGT  | 43 |
| GCTGCTA  | 76 |
| GCTGCTC  | 61 |
| GCTGCTG  | 97 |
| GCTGCTT  | 76 |
| GCTGGAA  | 47 |
| GCTGGAC  | 36 |
| GCTGGAG  | 61 |
| GCTGGAT  | 18 |
| GCTGGCA  | 22 |
| GCTGGCC  | 47 |
| GCTGGCG  | 54 |
| GCTGGCT  | 76 |
| GCTGGGA  | 29 |
| GCTGGGC  | 54 |
| GCTGGGG  | 36 |
| GCTGGGT  | 32 |
| GCTGGTA  | 14 |
| GCTGGTC  | 51 |
| GCTGGTG  | 61 |
| GCTGGTT  | 58 |
| GCTGTAA  | 25 |
| GCTGTAC  | 22 |
| GCTGTAG  | 61 |
| GCTGTAT  | 25 |
| GCTGTCA  | 36 |
| GCTGTCC  | 58 |
| GCTGTCCG | 25 |
| GCTGTCT  | 36 |
| GCTGTGA  | 54 |
| GCTGTGC  | 61 |
| GCTGTGG  | 54 |
| GCTGTGT  | 58 |
| GCTGTTA  | 43 |
| GCTGTTC  | 43 |
| GCTGTTG  | 47 |
| GCTGTTT  | 51 |
| GCTTAAA  | 87 |
| GCTTAAC  | 47 |
| GCTTAAG  | 36 |
| GCTTAAT  | 47 |
| GCTTACA  | 43 |
| GCTTACC  | 14 |
| GCTTACG  | 14 |
| GCTTACT  | 25 |
| GCTTAGA  | 32 |
| GCTTAGC  | 32 |
| GCTTAGG  | 32 |
| GCTTAGT  | 22 |
| GCTTATA  | 61 |
| GCTTATC  | 43 |
| GCTTATG  | 29 |

|         |     |
|---------|-----|
| GCTTATT | 54  |
| GCTTCAA | 51  |
| GCTTCAC | 51  |
| GCTTCAG | 51  |
| GCTTCAT | 40  |
| GCTTCCA | 47  |
| GCTTCCC | 65  |
| GCTTCCG | 47  |
| GCTTCCT | 97  |
| GCTTCGA | 40  |
| GCTTCGC | 32  |
| GCTTCGG | 47  |
| GCTTCGT | 61  |
| GCTTCTA | 65  |
| GCTTCTC | 87  |
| GCTTCTG | 76  |
| GCTTCTT | 108 |
| GCTTGAA | 40  |
| GCTTGAC | 40  |
| GCTTGAG | 69  |
| GCTTGAT | 54  |
| GCTTGCA | 65  |
| GCTTGCC | 51  |
| GCTTGCG | 65  |
| GCTTGCT | 61  |
| GCTTGGA | 69  |
| GCTTGGC | 43  |
| GCTTGGG | 14  |
| GCTTGGT | 54  |
| GCTTGTA | 69  |
| GCTTGTC | 79  |
| GCTTGTG | 61  |
| GCTTGTT | 155 |
| GCTTTAA | 65  |
| GCTTTAC | 25  |
| GCTTTAG | 43  |
| GCTTTAT | 72  |
| GCTTTCA | 51  |
| GCTTTCC | 83  |
| GCTTTCG | 32  |
| GCTTTCT | 105 |
| GCTTTGA | 72  |
| GCTTTGC | 65  |
| GCTTTGG | 72  |
| GCTTTGT | 101 |
| GCTTTTA | 65  |
| GCTTTTC | 90  |
| GCTTTTG | 115 |
| GCTTTTT | 123 |
| GGAAAAA | 152 |
| GGAAAAC | 90  |
| GGAAAAG | 94  |

|         |     |
|---------|-----|
| GGAAAAT | 72  |
| GGAAACA | 61  |
| GGAAACC | 61  |
| GGAAACG | 32  |
| GGAAACT | 61  |
| GGAAAGA | 54  |
| GGAAAGC | 72  |
| GGAAAGG | 79  |
| GGAAAGT | 72  |
| GGAAATA | 79  |
| GGAAATC | 47  |
| GGAAATG | 61  |
| GGAAATT | 54  |
| GGAACAA | 58  |
| GGAACAC | 36  |
| GGAACAG | 40  |
| GGAACAT | 29  |
| GGAACCA | 54  |
| GGAACCC | 47  |
| GGAACCG | 47  |
| GGAACCT | 36  |
| GGAACGA | 40  |
| GGAACGC | 29  |
| GGAACGG | 32  |
| GGAACGT | 14  |
| GGAACTA | 47  |
| GGAACTC | 36  |
| GGAACTG | 29  |
| GGAACTT | 40  |
| GGAAGAA | 133 |
| GGAAGAC | 72  |
| GGAAGAG | 97  |
| GGAAGAT | 58  |
| GGAAGCA | 65  |
| GGAAGCC | 69  |
| GGAAGCG | 29  |
| GGAAGCT | 47  |
| GGAAGGA | 69  |
| GGAAGGC | 54  |
| GGAAGGG | 36  |
| GGAAGGT | 51  |
| GGAAGTA | 32  |
| GGAAGTC | 25  |
| GGAAGTG | 47  |
| GGAAGTT | 61  |
| GGAATAA | 90  |
| GGAATAC | 11  |
| GGAATAG | 36  |
| GGAATAT | 18  |
| GGAATCA | 65  |
| GGAATCC | 29  |
| GGAATCG | 32  |

|          |     |
|----------|-----|
| GGAATCT  | 36  |
| GGAATGA  | 29  |
| GGAATGG  | 65  |
| GGAATGT  | 18  |
| GGAATTA  | 36  |
| GGAATTC  | 29  |
| GGAATTG  | 65  |
| GGAATTT  | 79  |
| GGACAAA  | 65  |
| GGACAAC  | 43  |
| GGACAAG  | 40  |
| GGACAAT  | 54  |
| GGACACA  | 76  |
| GGACACC  | 54  |
| GGACACG  | 32  |
| GGACACT  | 47  |
| GGACAGA  | 47  |
| GGACAGC  | 25  |
| GGACAGG  | 54  |
| GGACAGT  | 97  |
| GGACATA  | 36  |
| GGACATC  | 29  |
| GGACATG  | 47  |
| GGACATT  | 32  |
| GGACCAA  | 47  |
| GGACCAC  | 58  |
| GGACCAG  | 54  |
| GGACCAT  | 36  |
| GGACCCA  | 32  |
| GGACCCC  | 29  |
| GGACCCG  | 47  |
| GGACCCCT | 36  |
| GGACCGA  | 36  |
| GGACCGC  | 32  |
| GGACCGG  | 43  |
| GGACCGT  | 51  |
| GGACCTA  | 32  |
| GGACCTC  | 22  |
| GGACCTG  | 40  |
| GGACCTT  | 58  |
| GGACGAA  | 40  |
| GGACGAC  | 65  |
| GGACGAG  | 54  |
| GGACGAT  | 32  |
| GGACGCA  | 32  |
| GGACGCC  | 51  |
| GGACGCG  | 22  |
| GGACGCT  | 32  |
| GGACGGA  | 76  |
| GGACGGC  | 40  |
| GGACGGG  | 29  |
| GGACGGT  | 155 |

|         |     |
|---------|-----|
| GGACGTA | 18  |
| GGACGTC | 18  |
| GGACGTG | 32  |
| GGACGTT | 40  |
| GGACTAA | 36  |
| GGACTAC | 18  |
| GGACTAG | 36  |
| GGACTAT | 51  |
| GGACTCA | 36  |
| GGACTCC | 43  |
| GGACTCG | 51  |
| GGACTCT | 51  |
| GGACTGA | 36  |
| GGACTGC | 65  |
| GGACTGG | 14  |
| GGACTGT | 97  |
| GGACTTA | 29  |
| GGACTTC | 54  |
| GGACTTG | 51  |
| GGACTTT | 43  |
| GGAGAAA | 90  |
| GGAGAAC | 32  |
| GGAGAAG | 79  |
| GGAGAAT | 51  |
| GGAGACA | 79  |
| GGAGACC | 29  |
| GGAGACG | 76  |
| GGAGACT | 32  |
| GGAGAGA | 115 |
| GGAGAGC | 97  |
| GGAGAGG | 130 |
| GGAGAGT | 61  |
| GGAGATA | 61  |
| GGAGATC | 32  |
| GGAGATG | 83  |
| GGAGATT | 32  |
| GGAGCAA | 97  |
| GGAGCAC | 58  |
| GGAGCAG | 36  |
| GGAGCAT | 43  |
| GGAGCCA | 83  |
| GGAGCCC | 29  |
| GGAGCCG | 36  |
| GGAGCCT | 72  |
| GGAGCGA | 36  |
| GGAGCGC | 22  |
| GGAGCGG | 65  |
| GGAGCGT | 32  |
| GGAGCTA | 65  |
| GGAGCTC | 83  |
| GGAGCTG | 90  |
| GGAGCTT | 54  |



|         |     |
|---------|-----|
| GGAGGAA | 108 |
| GGAGGAC | 65  |
| GGAGGAG | 180 |
| GGAGGAT | 65  |
| GGAGGCA | 83  |
| GGAGGCC | 54  |
| GGAGGCG | 54  |
| GGAGGCT | 61  |
| GGAGGGA | 97  |
| GGAGGGC | 54  |
| GGAGGGG | 76  |
| GGAGGGT | 25  |
| GGAGGTA | 32  |
| GGAGGTC | 61  |
| GGAGGTG | 83  |
| GGAGGTT | 65  |
| GGAGTAA | 51  |
| GGAGTAC | 36  |
| GGAGTAG | 69  |
| GGAGTAT | 65  |
| GGAGTCA | 29  |
| GGAGTCC | 25  |
| GGAGTCG | 36  |
| GGAGTCT | 36  |
| GGAGTGA | 72  |
| GGAGTGC | 32  |
| GGAGTGG | 47  |
| GGAGTGT | 32  |
| GGAGTTA | 40  |
| GGAGTTC | 43  |
| GGAGTTG | 79  |
| GGAGTTT | 72  |
| GGATAAA | 79  |
| GGATAAC | 36  |
| GGATAAG | 47  |
| GGATAAT | 43  |
| GGATACA | 54  |
| GGATACC | 22  |
| GGATACG | 32  |
| GGATACT | 29  |
| GGATAGA | 36  |
| GGATAGC | 18  |
| GGATAGG | 11  |
| GGATAGT | 51  |
| GGATATA | 58  |
| GGATATC | 29  |
| GGATATG | 47  |
| GGATATT | 54  |
| GGATCAA | 36  |
| GGATCAC | 65  |
| GGATCAG | 40  |
| GGATCAT | 51  |

|          |     |
|----------|-----|
| GGATCCA  | 76  |
| GGATCCC  | 61  |
| GGATCCG  | 47  |
| GGATCCT  | 51  |
| GGATCGA  | 32  |
| GGATCGC  | 25  |
| GGATCGG  | 47  |
| GGATCGT  | 18  |
| GGATCTA  | 79  |
| GGATCTC  | 40  |
| GGATCTG  | 43  |
| GGATCTT  | 58  |
| GGATGAA  | 90  |
| GGATGAC  | 47  |
| GGATGAG  | 61  |
| GGATGAT  | 51  |
| GGATGCA  | 69  |
| GGATGCC  | 32  |
| GGATGCG  | 25  |
| GGATGCT  | 32  |
| GGATGGA  | 61  |
| GGATGGC  | 61  |
| GGATGGG  | 36  |
| GGATGGT  | 61  |
| GGATGTA  | 51  |
| GGATGTA  | 51  |
| GGATGTC  | 65  |
| GGATGTG  | 58  |
| GGATTAA  | 61  |
| GGATTAC  | 51  |
| GGATTAG  | 14  |
| GGATTAT  | 76  |
| GGATTCA  | 65  |
| GGATTCC  | 51  |
| GGATTCCG | 47  |
| GGATTCT  | 25  |
| GGATTGA  | 72  |
| GGATTGC  | 61  |
| GGATTGG  | 87  |
| GGATTGT  | 61  |
| GGATTTA  | 29  |
| GGATTTC  | 40  |
| GGATTTG  | 101 |
| GGATTTT  | 79  |
| GGCAAAA  | 61  |
| GGCAAAC  | 54  |
| GGCAAAG  | 83  |
| GGCAAAT  | 32  |
| GGCAACA  | 51  |
| GGCAACA  | 51  |
| GGCAACC  | 69  |
| GGCAACT  | 51  |

|         |    |
|---------|----|
| GGCAAGA | 69 |
| GGCAAGC | 51 |
| GGCAAGG | 76 |
| GGCAAGT | 47 |
| GGCAATA | 18 |
| GGCAATC | 29 |
| GGCAATG | 47 |
| GGCAATT | 25 |
| GGCACAA | 43 |
| GGCACAC | 79 |
| GGCACAG | 61 |
| GGCACAT | 65 |
| GGCACCA | 40 |
| GGCACCC | 32 |
| GGCACCG | 72 |
| GGCACCT | 43 |
| GGCACGA | 36 |
| GGCACGC | 36 |
| GGCACGG | 61 |
| GGCACGT | 29 |
| GGCACTA | 29 |
| GGCACTC | 54 |
| GGCACTG | 43 |
| GGCACTT | 54 |
| GGCAGAA | 40 |
| GGCAGAC | 29 |
| GGCAGAG | 25 |
| GGCAGAT | 40 |
| GGCAGCA | 87 |
| GGCAGCC | 61 |
| GGCAGCG | 32 |
| GGCAGCT | 40 |
| GGCAGGA | 40 |
| GGCAGGC | 65 |
| GGCAGGG | 40 |
| GGCAGGT | 40 |
| GGCAGTA | 29 |
| GGCAGTC | 25 |
| GGCAGTG | 47 |
| GGCAGTT | 25 |
| GGCATAA | 43 |
| GGCATAC | 51 |
| GGCATAG | 22 |
| GGCATAT | 69 |
| GGCATCA | 72 |
| GGCATCC | 58 |
| GGCATCG | 40 |
| GGCATCT | 72 |
| GGCATGA | 54 |
| GGCATGC | 83 |
| GGCATGG | 58 |
| GGCATGT | 69 |

|         |     |
|---------|-----|
| GGCATT  | 51  |
| GGCATT  | 25  |
| GGCATT  | 47  |
| GGCATT  | 54  |
| GGCCAAA | 83  |
| GGCCAAC | 32  |
| GGCCAAG | 65  |
| GGCCAAT | 65  |
| GGCCACA | 90  |
| GGCCACC | 83  |
| GGCCACG | 83  |
| GGCCACT | 47  |
| GGCCAGA | 101 |
| GGCCAGC | 69  |
| GGCCAGG | 54  |
| GGCCAGT | 29  |
| GGCCATA | 51  |
| GGCCATA | 51  |
| GGCCATG | 61  |
| GGCCATT | 76  |
| GGCCCAA | 76  |
| GGCCCAC | 72  |
| GGCCCAG | 47  |
| GGCCCAT | 69  |
| GGCCCCA | 54  |
| GGCCCCC | 54  |
| GGCCCCG | 47  |
| GGCCCCT | 29  |
| GGCCCGA | 36  |
| GGCCCGC | 54  |
| GGCCCGG | 90  |
| GGCCCGT | 43  |
| GGCCCTA | 43  |
| GGCCCTC | 36  |
| GGCCCTG | 36  |
| GGCCCTT | 47  |
| GGCCGAA | 51  |
| GGCCGAC | 36  |
| GGCCGAG | 43  |
| GGCCGAT | 14  |
| GGCCGCA | 36  |
| GGCCGCC | 87  |
| GGCCGCG | 61  |
| GGCCGCT | 18  |
| GGCCGGA | 90  |
| GGCCGGC | 115 |
| GGCCGGG | 79  |
| GGCCGGT | 36  |
| GGCCGTA | 25  |
| GGCCGTC | 29  |
| GGCCGTG | 69  |
| GGCCGTT | 36  |

|         |     |
|---------|-----|
| GGCCTAA | 54  |
| GGCCTAC | 25  |
| GGCCTAG | 36  |
| GGCCTAT | 22  |
| GGCCTCA | 29  |
| GGCCTCC | 36  |
| GGCCTCG | 47  |
| GGCCTCT | 32  |
| GGCCTGA | 43  |
| GGCCTGC | 65  |
| GGCCTGG | 58  |
| GGCCTGT | 54  |
| GGCCTTA | 18  |
| GGCCTTC | 54  |
| GGCCTTG | 69  |
| GGCCTTT | 51  |
| GGCGAAA | 47  |
| GGCGAAC | 29  |
| GGCGAAG | 65  |
| GGCGAAT | 11  |
| GGCGACA | 29  |
| GGCGACC | 47  |
| GGCGACG | 43  |
| GGCGACT | 32  |
| GGCGAGA | 54  |
| GGCGAGC | 22  |
| GGCGAGG | 76  |
| GGCGAGT | 43  |
| GGCGATA | 7   |
| GGCGATC | 36  |
| GGCGATG | 32  |
| GGCGATT | 29  |
| GGCGCAA | 36  |
| GGCGCAC | 47  |
| GGCGCAG | 54  |
| GGCGCAT | 25  |
| GGCGCCA | 87  |
| GGCGCCC | 47  |
| GGCGCCG | 47  |
| GGCGCCT | 58  |
| GGCGCGA | 25  |
| GGCGCGC | 76  |
| GGCGCGG | 54  |
| GGCGCGT | 40  |
| GGCGCTA | 36  |
| GGCGCTC | 18  |
| GGCGCTG | 51  |
| GGCGCTT | 18  |
| GGCGGAA | 11  |
| GGCGGAC | 25  |
| GGCGGAG | 112 |
| GGCGGAT | 36  |

|         |    |
|---------|----|
| GGCGGCA | 76 |
| GGCGGCC | 65 |
| GGCGGCG | 94 |
| GGCGGCT | 47 |
| GGCGGGA | 11 |
| GGCGGGC | 58 |
| GGCGGGG | 43 |
| GGCGGGT | 43 |
| GGCGGTA | 40 |
| GGCGGTC | 40 |
| GGCGGTG | 87 |
| GGCGGTT | 14 |
| GGCGTAA | 11 |
| GGCGTAA | 11 |
| GGCGTAC | 43 |
| GGCGTAG | 14 |
| GGCGTCA | 51 |
| GGCGTCC | 43 |
| GGCGTCG | 51 |
| GGCGTCT | 36 |
| GGCGTGA | 25 |
| GGCGTGC | 61 |
| GGCGTGG | 51 |
| GGCGTGT | 36 |
| GGCGTTA | 4  |
| GGCGTTC | 18 |
| GGCGTTG | 14 |
| GGCGTTT | 36 |
| GGCTAAA | 76 |
| GGCTAAC | 36 |
| GGCTAAG | 29 |
| GGCTAAT | 40 |
| GGCTACA | 40 |
| GGCTACC | 29 |
| GGCTACG | 29 |
| GGCTACT | 47 |
| GGCTAGA | 47 |
| GGCTAGC | 83 |
| GGCTAGG | 61 |
| GGCTAGT | 32 |
| GGCTATA | 90 |
| GGCTATC | 40 |
| GGCTATG | 36 |
| GGCTATT | 25 |
| GGCTCAA | 54 |
| GGCTCAC | 69 |
| GGCTCAG | 36 |
| GGCTCAT | 40 |
| GGCTCCA | 58 |
| GGCTCCC | 61 |
| GGCTCCG | 36 |
| GGCTCCT | 51 |

|         |     |
|---------|-----|
| GGCTCGA | 51  |
| GGCTCGC | 47  |
| GGCTCGG | 61  |
| GGCTCGT | 32  |
| GGCTCTA | 47  |
| GGCTCTC | 61  |
| GGCTCTG | 47  |
| GGCTCTT | 58  |
| GGCTGAA | 36  |
| GGCTGAC | 54  |
| GGCTGAG | 58  |
| GGCTGAT | 40  |
| GGCTGCA | 58  |
| GGCTGCC | 65  |
| GGCTGCG | 47  |
| GGCTGCT | 83  |
| GGCTGGA | 47  |
| GGCTGGC | 51  |
| GGCTGGG | 14  |
| GGCTGGT | 32  |
| GGCTGTA | 18  |
| GGCTGTC | 32  |
| GGCTGTG | 76  |
| GGCTGTT | 47  |
| GGCTTAA | 51  |
| GGCTTAC | 18  |
| GGCTTAG | 25  |
| GGCTTAT | 36  |
| GGCTTCA | 47  |
| GGCTTCC | 32  |
| GGCTTCG | 51  |
| GGCTTCT | 65  |
| GGCTTGA | 18  |
| GGCTTGC | 65  |
| GGCTTGG | 51  |
| GGCTTGT | 69  |
| GGCTTTA | 32  |
| GGCTTTC | 51  |
| GGCTTTG | 76  |
| GGCTTTT | 72  |
| GGGAAAA | 101 |
| GGGAAAC | 29  |
| GGGAAAG | 54  |
| GGGAAAT | 61  |
| GGGAACA | 32  |
| GGGAACA | 32  |
| GGGAACC | 22  |
| GGGAACG | 32  |
| GGGAAGA | 94  |
| GGGAAGC | 61  |
| GGGAAGG | 43  |
| GGGAAGT | 29  |

|         |     |
|---------|-----|
| GGGAATA | 29  |
| GGGAATC | 36  |
| GGGAATG | 14  |
| GGGAATT | 51  |
| GGGACAA | 32  |
| GGGACAC | 61  |
| GGGACAG | 36  |
| GGGACAT | 25  |
| GGGACCA | 40  |
| GGGACCC | 36  |
| GGGACCG | 36  |
| GGGACCT | 22  |
| GGGACGA | 43  |
| GGGACGC | 47  |
| GGGACGG | 40  |
| GGGACGT | 14  |
| GGGACTA | 43  |
| GGGACTC | 25  |
| GGGACTG | 25  |
| GGGACTT | 32  |
| GGGAGAA | 54  |
| GGGAGAC | 36  |
| GGGAGAG | 137 |
| GGGAGAT | 54  |
| GGGAGCA | 36  |
| GGGAGCC | 43  |
| GGGAGCG | 43  |
| GGGAGCT | 47  |
| GGGAGGA | 79  |
| GGGAGGC | 40  |
| GGGAGGG | 72  |
| GGGAGGT | 76  |
| GGGAGTA | 54  |
| GGGAGTC | 18  |
| GGGAGTG | 43  |
| GGGAGTT | 54  |
| GGGATAA | 58  |
| GGGATAC | 18  |
| GGGATAG | 25  |
| GGGATAT | 32  |
| GGGATCA | 18  |
| GGGATCC | 22  |
| GGGATCG | 18  |
| GGGATCT | 51  |
| GGGATGA | 43  |
| GGGATGC | 29  |
| GGGATGG | 25  |
| GGGATGT | 22  |
| GGGATTA | 29  |
| GGGATTC | 58  |
| GGGATTG | 76  |
| GGGATTT | 40  |



|         |    |
|---------|----|
| GGGCAA  | 40 |
| GGGCAAC | 65 |
| GGGCAAG | 69 |
| GGGCAAT | 14 |
| GGGCACA | 32 |
| GGGCACC | 51 |
| GGGCACG | 40 |
| GGGCACT | 29 |
| GGGCAGA | 36 |
| GGGCAGC | 40 |
| GGGCAGG | 40 |
| GGGCAGT | 36 |
| GGGCATA | 25 |
| GGGCATA | 25 |
| GGGCATC | 36 |
| GGGCATT | 25 |
| GGGCCAA | 65 |
| GGGCCAC | 72 |
| GGGCCAG | 76 |
| GGGCCAT | 32 |
| GGGCCCA | 94 |
| GGGCCCC | 61 |
| GGGCCCG | 58 |
| GGGCCCT | 36 |
| GGGCCGA | 43 |
| GGGCCGC | 32 |
| GGGCCGG | 94 |
| GGGCCGT | 22 |
| GGGCCTA | 36 |
| GGGCCTC | 29 |
| GGGCCTG | 58 |
| GGGCCTT | 40 |
| GGGCGAA | 43 |
| GGGCGAC | 51 |
| GGGCGAG | 76 |
| GGGCGAT | 14 |
| GGGCGCA | 25 |
| GGGCGCC | 54 |
| GGGCGCG | 51 |
| GGGCGCT | 11 |
| GGGCGGA | 54 |
| GGGCGGC | 72 |
| GGGCGGG | 40 |
| GGGCGGT | 40 |
| GGGCGTA | 11 |
| GGGCGTC | 40 |
| GGGCGTG | 32 |
| GGGCGTT | 4  |
| GGGCTAA | 54 |
| GGGCTAC | 22 |
| GGGCTAG | 69 |
| GGGCTAT | 22 |

|         |     |
|---------|-----|
| GGGCTCA | 36  |
| GGGCTCC | 40  |
| GGGCTCG | 54  |
| GGGCTCT | 43  |
| GGGCTGA | 54  |
| GGGCTGC | 58  |
| GGGCTGG | 43  |
| GGGCTGT | 14  |
| GGGCTTA | 40  |
| GGGCTTC | 43  |
| GGGCTTG | 40  |
| GGGCTTT | 51  |
| GGGGAAA | 54  |
| GGGGAAC | 25  |
| GGGGAAG | 65  |
| GGGGAAT | 25  |
| GGGGACA | 32  |
| GGGGACC | 36  |
| GGGGACG | 36  |
| GGGGACT | 29  |
| GGGGAGA | 94  |
| GGGGAGC | 43  |
| GGGGAGG | 119 |
| GGGGAGT | 51  |
| GGGGATA | 40  |
| GGGGATC | 29  |
| GGGGATG | 32  |
| GGGGATT | 58  |
| GGGGCAA | 40  |
| GGGGCAC | 47  |
| GGGGCAG | 47  |
| GGGGCAT | 18  |
| GGGGCCA | 43  |
| GGGGCCC | 61  |
| GGGGCCG | 29  |
| GGGGCCT | 47  |
| GGGGCGA | 51  |
| GGGGCGC | 47  |
| GGGGCGG | 58  |
| GGGGCGT | 18  |
| GGGGCTA | 36  |
| GGGGCTC | 36  |
| GGGGCTG | 32  |
| GGGGCTT | 25  |
| GGGGGAA | 51  |
| GGGGGAC | 14  |
| GGGGGAG | 141 |
| GGGGGAT | 36  |
| GGGGGCA | 51  |
| GGGGGCC | 65  |
| GGGGGCG | 47  |
| GGGGGCT | 18  |

|          |     |
|----------|-----|
| GGGGGGA  | 79  |
| GGGGGGC  | 58  |
| GGGGGGG  | 119 |
| GGGGGGT  | 51  |
| GGGGGTA  | 22  |
| GGGGGTC  | 54  |
| GGGGGTG  | 87  |
| GGGGGTT  | 29  |
| GGGGTAA  | 51  |
| GGGGTAC  | 25  |
| GGGGTAG  | 29  |
| GGGGTAT  | 36  |
| GGGGTCA  | 32  |
| GGGGTCC  | 47  |
| GGGGTCG  | 54  |
| GGGGTCT  | 43  |
| GGGGTGA  | 76  |
| GGGGTGC  | 43  |
| GGGGTGG  | 61  |
| GGGGTGT  | 36  |
| GGGGTTA  | 40  |
| GGGGTTC  | 32  |
| GGGGTTG  | 51  |
| GGGGTTT  | 54  |
| GGGTAAA  | 43  |
| GGGTAAAC | 47  |
| GGGTAAAG | 32  |
| GGGTAAAT | 29  |
| GGGTACA  | 36  |
| GGGTACC  | 54  |
| GGGTACG  | 11  |
| GGGTACT  | 11  |
| GGGTAGA  | 22  |
| GGGTAGC  | 32  |
| GGGTAGG  | 22  |
| GGGTAGT  | 22  |
| GGGTATA  | 29  |
| GGGTATC  | 40  |
| GGGTATG  | 14  |
| GGGTATT  | 58  |
| GGGTCAA  | 22  |
| GGGTCAC  | 32  |
| GGGTCAG  | 18  |
| GGGTCAT  | 43  |
| GGGTCCA  | 22  |
| GGGTCCA  | 22  |
| GGGTCCG  | 22  |
| GGGTCCT  | 32  |
| GGGTCGA  | 36  |
| GGGTCGC  | 25  |
| GGGTCGG  | 61  |
| GGGTCGT  | 51  |

|         |    |
|---------|----|
| GGGTCTA | 43 |
| GGGTCTC | 40 |
| GGGTCTG | 32 |
| GGGTCTT | 43 |
| GGGTGAA | 54 |
| GGGTGAC | 51 |
| GGGTGAG | 61 |
| GGGTGAT | 65 |
| GGGTGCA | 65 |
| GGGTGCC | 22 |
| GGGTGCG | 43 |
| GGGTGCT | 51 |
| GGGTGGA | 40 |
| GGGTGGC | 29 |
| GGGTGGG | 72 |
| GGGTGGT | 36 |
| GGGTGTA | 54 |
| GGGTGTC | 54 |
| GGGTGTG | 58 |
| GGGTGTT | 58 |
| GGGTTAA | 43 |
| GGGTTAC | 22 |
| GGGTTAG | 25 |
| GGGTTAT | 58 |
| GGGTTCA | 51 |
| GGGTTC  | 22 |
| GGGTTCG | 25 |
| GGGTTCT | 29 |
| GGGTTGA | 36 |
| GGGTTGC | 43 |
| GGGTTGG | 54 |
| GGGTTGT | 69 |
| GGGTTTA | 51 |
| GGGTTTC | 40 |
| GGGTTTG | 69 |
| GGGTTTT | 69 |
| GGTAAAA | 94 |
| GGTAAAC | 36 |
| GGTAAAG | 79 |
| GGTAAAT | 36 |
| GGTAACA | 40 |
| GGTAACC | 32 |
| GGTAACG | 14 |
| GGTAACT | 25 |
| GGTAAGA | 32 |
| GGTAAGC | 14 |
| GGTAAGG | 25 |
| GGTAAGT | 47 |
| GGTAATA | 25 |
| GGTAATC | 4  |
| GGTAATG | 72 |
| GGTAATT | 54 |

|         |    |
|---------|----|
| GGTACAA | 47 |
| GGTACAC | 18 |
| GGTACAG | 22 |
| GGTACAT | 58 |
| GGTACCA | 54 |
| GGTACCC | 61 |
| GGTACCG | 32 |
| GGTACCT | 29 |
| GGTACGA | 25 |
| GGTACGC | 4  |
| GGTACGG | 40 |
| GGTACGT | 25 |
| GGTACTA | 32 |
| GGTACTC | 18 |
| GGTACTG | 22 |
| GGTACTT | 14 |
| GGTAGAA | 54 |
| GGTAGAC | 32 |
| GGTAGAG | 40 |
| GGTAGAT | 22 |
| GGTAGCA | 43 |
| GGTAGCC | 29 |
| GGTAGCG | 11 |
| GGTAGCT | 54 |
| GGTAGGA | 40 |
| GGTAGGC | 14 |
| GGTAGGG | 32 |
| GGTAGGT | 25 |
| GGTAGTA | 29 |
| GGTAGTC | 18 |
| GGTAGTG | 32 |
| GGTAGTT | 18 |
| GGTATAA | 43 |
| GGTATAC | 36 |
| GGTATAG | 25 |
| GGTATAT | 54 |
| GGTATCA | 43 |
| GGTATCC | 51 |
| GGTATCG | 18 |
| GGTATCT | 43 |
| GGTATGA | 47 |
| GGTATGA | 47 |
| GGTATGC | 22 |
| GGTATGT | 61 |
| GGTATTA | 54 |
| GGTATTC | 76 |
| GGTATTG | 43 |
| GGTATTT | 65 |
| GGTCAAA | 43 |
| GGTCAAC | 40 |
| GGTCAAG | 22 |
| GGTCAAT | 29 |

|         |     |
|---------|-----|
| GGTCACA | 36  |
| GGTCACC | 54  |
| GGTCACG | 11  |
| GGTCACT | 69  |
| GGTCAGA | 36  |
| GGTCAGC | 36  |
| GGTCAGG | 32  |
| GGTCAGT | 54  |
| GGTCATA | 29  |
| GGTCATC | 58  |
| GGTCATG | 54  |
| GGTCATT | 47  |
| GGTCCAA | 36  |
| GGTCCAC | 40  |
| GGTCCAG | 69  |
| GGTCCAT | 40  |
| GGTCCCA | 54  |
| GGTCCCC | 40  |
| GGTCCCG | 22  |
| GGTCCCT | 72  |
| GGTCCGA | 36  |
| GGTCCGC | 105 |
| GGTCCGG | 94  |
| GGTCCGT | 40  |
| GGTCCTA | 7   |
| GGTCCTC | 43  |
| GGTCCTG | 40  |
| GGTCCTT | 76  |
| GGTCGAA | 29  |
| GGTCGAA | 29  |
| GGTCGAG | 69  |
| GGTCGAT | 29  |
| GGTCGCA | 7   |
| GGTCGCC | 69  |
| GGTCGCG | 40  |
| GGTCGCT | 40  |
| GGTCGGA | 47  |
| GGTCGGC | 40  |
| GGTCGGG | 61  |
| GGTCGGT | 32  |
| GGTCGTA | 29  |
| GGTCGTC | 72  |
| GGTCGTG | 76  |
| GGTCGTT | 40  |
| GGTCTAA | 29  |
| GGTCTAC | 47  |
| GGTCTAG | 43  |
| GGTCTAT | 25  |
| GGTCTCA | 40  |
| GGTCTCC | 58  |
| GGTCTCG | 36  |
| GGTCTCT | 69  |

|            |     |
|------------|-----|
| GGTCTGA    | 25  |
| GGTCTGC    | 51  |
| GGTCTGG    | 54  |
| GGTCTGT    | 51  |
| GGTCTTA    | 40  |
| GGTCTTC    | 36  |
| GGTCTTG    | 43  |
| GGTCTTT    | 87  |
| GGTGAAA    | 43  |
| GGTGAAC    | 47  |
| GGTGAAG    | 94  |
| GGTGAAT    | 79  |
| GGTGACA    | 51  |
| GGTGACC    | 43  |
| GGTGACG    | 61  |
| GGTGACTION | 32  |
| GGTGAGA    | 58  |
| GGTGAGC    | 72  |
| GGTGAGG    | 36  |
| GGTGAGT    | 61  |
| GGTGATA    | 36  |
| GGTGATC    | 61  |
| GGTGATG    | 83  |
| GGTGATT    | 76  |
| GGTGCAA    | 65  |
| GGTGCAC    | 101 |
| GGTGCAG    | 65  |
| GGTGCAT    | 83  |
| GGTGCCA    | 51  |
| GGTGCCC    | 43  |
| GGTGCCG    | 22  |
| GGTGCCT    | 40  |
| GGTGCGA    | 22  |
| GGTGCGC    | 76  |
| GGTGCGG    | 58  |
| GGTGCGT    | 25  |
| GGTGCTA    | 36  |
| GGTGCTC    | 61  |
| GGTGCTG    | 36  |
| GGTGCTT    | 69  |
| GGTGCAA    | 54  |
| GGTGGAC    | 43  |
| GGTGGAG    | 76  |
| GGTGGAT    | 54  |
| GGTGGCA    | 83  |
| GGTGGCC    | 51  |
| GGTGGCG    | 87  |
| GGTGGCT    | 43  |
| GGTGGGA    | 40  |
| GGTGGGC    | 72  |
| GGTGGGG    | 79  |
| GGTGGGT    | 54  |

|         |     |
|---------|-----|
| GGTGGTA | 65  |
| GGTGGTC | 58  |
| GGTGGTG | 137 |
| GGTGGTT | 83  |
| GGTGTA  | 61  |
| GGTGTA  | 61  |
| GGTGTA  | 69  |
| GGTGTA  | 36  |
| GGTGTA  | 54  |
| GGTGTA  | 36  |
| GGTGTA  | 58  |
| GGTGTA  | 65  |
| GGTGTA  | 47  |
| GGTGTA  | 72  |
| GGTGTA  | 65  |
| GGTGTA  | 54  |
| GGTGTA  | 36  |
| GGTGTA  | 47  |
| GGTGTA  | 54  |
| GGTGTA  | 87  |
| GGTAAA  | 65  |
| GGTAA   | 25  |
| GGTAA   | 25  |
| GGTAA   | 29  |
| GGTAA   | 40  |
| GGTAA   | 36  |
| GGTAA   | 7   |
| GGTAA   | 25  |
| GGTAA   | 51  |
| GGTAA   | 43  |
| GGTAA   | 47  |
| GGTAA   | 29  |
| GGTAA   | 61  |
| GGTAA   | 36  |
| GGTAA   | 47  |
| GGTAA   | 51  |
| GGTAA   | 40  |
| GGTAA   | 47  |
| GGTAA   | 51  |
| GGTAA   | 29  |
| GGTAA   | 54  |
| GGTAA   | 25  |
| GGTAA   | 29  |
| GGTAA   | 43  |
| GGTAA   | 25  |
| GGTAA   | 22  |
| GGTAA   | 40  |
| GGTAA   | 51  |
| GGTAA   | 61  |
| GGTAA   | 18  |
| GGTAA   | 40  |
| GGTAA   | 115 |



|         |     |
|---------|-----|
| GGTTGAA | 69  |
| GGTTGAC | 18  |
| GGTTGAG | 51  |
| GGTTGAT | 58  |
| GGTTGCA | 51  |
| GGTTGCC | 47  |
| GGTTGCG | 25  |
| GGTTGCT | 72  |
| GGTTGGA | 72  |
| GGTTGGC | 43  |
| GGTTGGG | 72  |
| GGTTGGT | 72  |
| GGTTGTA | 54  |
| GGTTGTC | 51  |
| GGTTGTG | 79  |
| GGTTGTT | 87  |
| GGTTTAA | 76  |
| GGTTTAC | 43  |
| GGTTTAG | 47  |
| GGTTTAT | 65  |
| GGTTTCA | 69  |
| GGTTTCC | 76  |
| GGTTTCG | 40  |
| GGTTTCT | 79  |
| GGTTTGA | 69  |
| GGTTTGC | 65  |
| GGTTTGG | 105 |
| GGTTTGT | 105 |
| GGTTTTA | 97  |
| GGTTTTC | 87  |
| GGTTTTG | 101 |
| GGTTTTT | 101 |
| GTAAAAA | 166 |
| GTAAAAC | 79  |
| GTAAAAG | 36  |
| GTAAAAT | 119 |
| GTAAACA | 94  |
| GTAAACC | 43  |
| GTAAACG | 11  |
| GTAAACT | 43  |
| GTAAAGA | 69  |
| GTAAAGC | 51  |
| GTAAAGG | 51  |
| GTAAAGT | 58  |
| GTAAATA | 94  |
| GTAAATC | 58  |
| GTAAATG | 61  |
| GTAAATT | 79  |
| GTAACAA | 58  |
| GTAACAC | 29  |
| GTAACAG | 43  |
| GTAACAT | 47  |

|         |    |
|---------|----|
| GTAACCA | 43 |
| GTAACCC | 25 |
| GTAACCG | 14 |
| GTAACCT | 7  |
| GTAACGA | 29 |
| GTAACGC | 14 |
| GTAACGG | 36 |
| GTAACGT | 29 |
| GTAACTA | 36 |
| GTAACTC | 47 |
| GTAACTG | 22 |
| GTAACTT | 51 |
| GTAAGAA | 51 |
| GTAAGAC | 43 |
| GTAAGAG | 43 |
| GTAAGAT | 43 |
| GTAAGCA | 25 |
| GTAAGCC | 22 |
| GTAAGCG | 22 |
| GTAAGCT | 22 |
| GTAAGGA | 25 |
| GTAAGGC | 11 |
| GTAAGGG | 58 |
| GTAAGGT | 36 |
| GTAAGTA | 47 |
| GTAAGTC | 29 |
| GTAAGTG | 43 |
| GTAAGTT | 25 |
| GTAATAA | 72 |
| GTAATAC | 54 |
| GTAATAG | 58 |
| GTAATAT | 61 |
| GTAATCA | 25 |
| GTAATCC | 25 |
| GTAATCG | 29 |
| GTAATCT | 43 |
| GTAATGA | 61 |
| GTAATGC | 54 |
| GTAATGG | 29 |
| GTAATGT | 65 |
| GTAATTA | 43 |
| GTAATTA | 43 |
| GTAATTC | 29 |
| GTAATTG | 58 |
| GTACAAA | 51 |
| GTACAAC | 61 |
| GTACAAG | 29 |
| GTACAAT | 43 |
| GTACACA | 36 |
| GTACACC | 54 |
| GTACACG | 32 |
| GTACACT | 43 |

|         |     |
|---------|-----|
| GTACAGA | 54  |
| GTACAGC | 29  |
| GTACAGG | 29  |
| GTACAGT | 22  |
| GTACATA | 43  |
| GTACATC | 43  |
| GTACATG | 119 |
| GTACATT | 61  |
| GTACCAA | 83  |
| GTACCAC | 40  |
| GTACCAG | 43  |
| GTACCAT | 36  |
| GTACCCA | 65  |
| GTACCCC | 54  |
| GTACCCG | 14  |
| GTACCCT | 32  |
| GTACCGA | 18  |
| GTACCGC | 14  |
| GTACCGG | 25  |
| GTACCGT | 40  |
| GTACCTA | 29  |
| GTACCTC | 22  |
| GTACCTG | 43  |
| GTACCTT | 43  |
| GTACGAA | 22  |
| GTACGAC | 32  |
| GTACGAG | 22  |
| GTACGAT | 32  |
| GTACGCA | 18  |
| GTACGCA | 18  |
| GTACGCC | 29  |
| GTACGCT | 14  |
| GTACGGA | 22  |
| GTACGGC | 29  |
| GTACGGG | 14  |
| GTACGGT | 32  |
| GTACGTA | 112 |
| GTACGTC | 25  |
| GTACGTG | 101 |
| GTACGTT | 32  |
| GTAATA  | 43  |
| GTAATA  | 61  |
| GTAATA  | 65  |
| GTAATA  | 29  |
| GTAATA  | 36  |
| GTAATA  | 51  |
| GTAATA  | 36  |
| GTAATA  | 43  |
| GTAATA  | 43  |
| GTAATA  | 58  |
| GTAATA  | 25  |
| GTAATA  | 54  |

|     |     |
|-----|-----|
| GTA | 22  |
| GTA | 29  |
| GTA | 47  |
| GTA | 43  |
| GTA | 133 |
| GTA | 43  |
| GTA | 40  |
| GTA | 54  |
| GTA | 36  |
| GTA | 29  |
| GTA | 25  |
| GTA | 43  |
| GTA | 76  |
| GTA | 51  |
| GTA | 40  |
| GTA | 40  |
| GTA | 29  |
| GTA | 54  |
| GTA | 54  |
| GTA | 65  |
| GTA | 65  |
| GTA | 32  |
| GTA | 54  |
| GTA | 54  |
| GTA | 58  |
| GTA | 32  |
| GTA | 29  |
| GTA | 51  |
| GTA | 4   |
| GTA | 14  |
| GTA | 36  |
| GTA | 18  |
| GTA | 76  |
| GTA | 29  |
| GTA | 58  |
| GTA | 61  |
| GTA | 83  |
| GTA | 22  |
| GTA | 32  |
| GTA | 43  |
| GTA | 43  |
| GTA | 36  |
| GTA | 18  |
| GTA | 14  |
| GTA | 36  |
| GTA | 36  |
| GTA | 54  |
| GTA | 47  |
| GTA | 22  |
| GTA | 14  |
| GTA | 32  |
| GTA | 36  |

|         |     |
|---------|-----|
| GTAGTAA | 32  |
| GTAGTAC | 40  |
| GTAGTAG | 69  |
| GTAGTAT | 40  |
| GTAGTCA | 22  |
| GTAGTCC | 40  |
| GTAGTCG | 7   |
| GTAGTCT | 36  |
| GTAGTGA | 54  |
| GTAGTGC | 51  |
| GTAGTGG | 79  |
| GTAGTGT | 94  |
| GTAGTTA | 40  |
| GTAGTTC | 29  |
| GTAGTTG | 43  |
| GTAGTTT | 47  |
| GTATAAA | 126 |
| GTATAAC | 36  |
| GTATAAG | 51  |
| GTATAAT | 83  |
| GTATACA | 72  |
| GTATACC | 40  |
| GTATACG | 14  |
| GTATACT | 43  |
| GTATAGA | 58  |
| GTATAGC | 43  |
| GTATAGG | 14  |
| GTATAGT | 58  |
| GTATATA | 155 |
| GTATATC | 54  |
| GTATATG | 72  |
| GTATATT | 97  |
| GTATCAA | 69  |
| GTATCAC | 58  |
| GTATCAG | 40  |
| GTATCAT | 22  |
| GTATCCA | 61  |
| GTATCCC | 29  |
| GTATCCG | 29  |
| GTATCCT | 36  |
| GTATCGA | 14  |
| GTATCGC | 11  |
| GTATCGG | 7   |
| GTATCGT | 29  |
| GTATCTA | 58  |
| GTATCTC | 32  |
| GTATCTG | 43  |
| GTATCTT | 54  |
| GTATGAA | 58  |
| GTATGAC | 18  |
| GTATGAG | 40  |
| GTATGAT | 61  |

|          |     |
|----------|-----|
| GTATGCA  | 43  |
| GTATGCC  | 18  |
| GTATGCG  | 18  |
| GTATGCT  | 29  |
| GTATGGA  | 25  |
| GTATGGC  | 32  |
| GTATGGG  | 29  |
| GTATGGT  | 61  |
| GTATGTA  | 79  |
| GTATGTA  | 79  |
| GTATGTG  | 65  |
| GTATGTT  | 79  |
| GTATTAA  | 79  |
| GTATTAC  | 47  |
| GTATTAG  | 43  |
| GTATTAT  | 87  |
| GTATTCA  | 76  |
| GTATTCC  | 79  |
| GTATTCG  | 7   |
| GTATTCT  | 72  |
| GTATTGA  | 47  |
| GTATTGC  | 22  |
| GTATTGG  | 43  |
| GTATTGT  | 47  |
| GTATTTA  | 119 |
| GTATTTTC | 97  |
| GTATTTTG | 58  |
| GTATTTT  | 130 |
| GTCAAAA  | 65  |
| GTCAAAC  | 87  |
| GTCAAAG  | 69  |
| GTCAAAT  | 47  |
| GTCAACA  | 69  |
| GTCAACC  | 18  |
| GTCAACG  | 40  |
| GTCAACT  | 36  |
| GTCAAGA  | 32  |
| GTCAAGC  | 40  |
| GTCAAGG  | 36  |
| GTCAAGT  | 32  |
| GTCAATA  | 58  |
| GTCAATC  | 25  |
| GTCAATG  | 36  |
| GTCAATT  | 54  |
| GTCACAA  | 47  |
| GTCACAC  | 69  |
| GTCACAG  | 40  |
| GTCACAT  | 54  |
| GTCACCA  | 58  |
| GTCACCC  | 76  |
| GTCACCG  | 58  |
| GTCACCT  | 58  |

|         |    |
|---------|----|
| GTCACGA | 22 |
| GTCACGC | 32 |
| GTCACGG | 18 |
| GTCACGT | 25 |
| GTCACTA | 25 |
| GTCACTC | 51 |
| GTCACTG | 76 |
| GTCACTT | 69 |
| GTCAGAA | 29 |
| GTCAGAC | 25 |
| GTCAGAG | 43 |
| GTCAGAT | 51 |
| GTCAGCA | 61 |
| GTCAGCC | 47 |
| GTCAGCG | 36 |
| GTCAGCT | 43 |
| GTCAGGA | 22 |
| GTCAGGC | 40 |
| GTCAGGG | 29 |
| GTCAGGT | 25 |
| GTCAGTA | 22 |
| GTCAGTC | 69 |
| GTCAGTG | 69 |
| GTCAGTT | 43 |
| GTCATAA | 54 |
| GTCATAC | 29 |
| GTCATAG | 18 |
| GTCATAT | 69 |
| GTCATCA | 36 |
| GTCATCC | 51 |
| GTCATCG | 36 |
| GTCATCT | 76 |
| GTCATGA | 51 |
| GTCATGC | 83 |
| GTCATGG | 36 |
| GTCATGT | 69 |
| GTCATTA | 47 |
| GTCATTC | 18 |
| GTCATTG | 43 |
| GTCATTT | 97 |
| GTCCAAA | 54 |
| GTCCAAC | 58 |
| GTCCAAG | 79 |
| GTCCAAT | 54 |
| GTCCACA | 43 |
| GTCCACC | 83 |
| GTCCACG | 54 |
| GTCCACT | 43 |
| GTCCAGA | 54 |
| GTCCAGC | 65 |
| GTCCAGG | 22 |
| GTCCAGT | 32 |

|          |     |
|----------|-----|
| GTCCATA  | 58  |
| GTCCATC  | 47  |
| GTCCATG  | 54  |
| GTCCATT  | 87  |
| GTCCCAA  | 65  |
| GTCCCAA  | 65  |
| GTCCCAC  | 51  |
| GTCCCAG  | 29  |
| GTCCCCA  | 54  |
| GTCCCCC  | 32  |
| GTCCCCG  | 43  |
| GTCCCCT  | 40  |
| GTCCCGA  | 18  |
| GTCCCGC  | 25  |
| GTCCCGG  | 11  |
| GTCCCGT  | 40  |
| GTCCCTA  | 76  |
| GTCCCTC  | 43  |
| GTCCCTG  | 32  |
| GTCCCTT  | 61  |
| GTCCGAA  | 40  |
| GTCCGAC  | 18  |
| GTCCGAG  | 61  |
| GTCCGAT  | 40  |
| GTCCGCA  | 36  |
| GTCCGCC  | 79  |
| GTCCGCG  | 105 |
| GTCCGCT  | 58  |
| GTCCGGA  | 51  |
| GTCCGGC  | 76  |
| GTCCGGG  | 32  |
| GTCCGGT  | 227 |
| GTCCGTA  | 18  |
| GTCCGTC  | 40  |
| GTCCGTG  | 51  |
| GTCCGTT  | 40  |
| GTCCCTAA | 51  |
| GTCCCTAC | 11  |
| GTCCCTAG | 7   |
| GTCCCTAT | 25  |
| GTCCCTCA | 29  |
| GTCCCTCC | 79  |
| GTCCCTCG | 40  |
| GTCCCTCT | 58  |
| GTCCCTGA | 32  |
| GTCCCTGC | 72  |
| GTCCCTGG | 32  |
| GTCCCTGT | 32  |
| GTCCCTTA | 43  |
| GTCCCTTC | 51  |
| GTCCCTTG | 87  |
| GTCCCTTT | 47  |



|         |    |
|---------|----|
| GTCGAAA | 25 |
| GTCGAAC | 25 |
| GTCGAAG | 36 |
| GTCGAAT | 29 |
| GTCGACA | 47 |
| GTCGACC | 69 |
| GTCGACG | 79 |
| GTCGACT | 43 |
| GTCGAGA | 40 |
| GTCGAGC | 58 |
| GTCGAGG | 58 |
| GTCGAGT | 43 |
| GTCGATA | 18 |
| GTCGATC | 61 |
| GTCGATG | 43 |
| GTCGATT | 40 |
| GTCGCAA | 32 |
| GTCGCAC | 18 |
| GTCGCAG | 29 |
| GTCGCAT | 29 |
| GTCGCCA | 58 |
| GTCGCCC | 32 |
| GTCGCCG | 43 |
| GTCGCCT | 65 |
| GTCGCGA | 18 |
| GTCGCGC | 43 |
| GTCGCGG | 32 |
| GTCGCGT | 58 |
| GTCGCTA | 43 |
| GTCGCTC | 40 |
| GTCGCTG | 25 |
| GTCGCTT | 25 |
| GTCGGAA | 18 |
| GTCGGAC | 43 |
| GTCGGAG | 40 |
| GTCGGAT | 25 |
| GTCGGCA | 25 |
| GTCGGCC | 58 |
| GTCGGCG | 51 |
| GTCGGCT | 43 |
| GTCGGGA | 14 |
| GTCGGGC | 83 |
| GTCGGGG | 40 |
| GTCGGGT | 11 |
| GTCGGTA | 22 |
| GTCGGTC | 36 |
| GTCGGTG | 43 |
| GTCGGTT | 29 |
| GTCGTAA | 14 |
| GTCGTAA | 14 |
| GTCGTAG | 43 |
| GTCGTAT | 25 |

|          |     |
|----------|-----|
| GTCGTCA  | 47  |
| GTCGTCC  | 94  |
| GTCGTCCG | 133 |
| GTCGTCT  | 79  |
| GTCGTGA  | 25  |
| GTCGTGC  | 40  |
| GTCGTGG  | 47  |
| GTCGTGT  | 83  |
| GTCGTTA  | 29  |
| GTCGTTC  | 25  |
| GTCGTTG  | 51  |
| GTCGTTT  | 43  |
| GTCTAAA  | 51  |
| GTCTAAC  | 29  |
| GTCTAAG  | 40  |
| GTCTAAT  | 40  |
| GTCTACA  | 47  |
| GTCTACC  | 25  |
| GTCTACG  | 22  |
| GTCTACT  | 47  |
| GTCTAGA  | 87  |
| GTCTAGC  | 29  |
| GTCTAGG  | 32  |
| GTCTAGT  | 40  |
| GTCTATA  | 83  |
| GTCTATC  | 29  |
| GTCTATG  | 40  |
| GTCTATT  | 72  |
| GTCTCAA  | 40  |
| GTCTCAC  | 51  |
| GTCTCAG  | 36  |
| GTCTCAT  | 47  |
| GTCTCCA  | 29  |
| GTCTCCC  | 61  |
| GTCTCCG  | 43  |
| GTCTCCT  | 72  |
| GTCTCGA  | 65  |
| GTCTCGA  | 65  |
| GTCTCGC  | 40  |
| GTCTCGT  | 47  |
| GTCTCTA  | 101 |
| GTCTCTC  | 90  |
| GTCTCTG  | 47  |
| GTCTCTT  | 133 |
| GTCTGAA  | 36  |
| GTCTGAC  | 22  |
| GTCTGAG  | 40  |
| GTCTGAT  | 29  |
| GTCTGCA  | 43  |
| GTCTGCC  | 32  |
| GTCTGCG  | 69  |
| GTCTGCT  | 69  |

|         |     |
|---------|-----|
| GTCTGGA | 29  |
| GTCTGGC | 43  |
| GTCTGGG | 47  |
| GTCTGGT | 51  |
| GTCTGTA | 32  |
| GTCTGTC | 40  |
| GTCTGTG | 32  |
| GTCTGTT | 83  |
| GTCTTAA | 43  |
| GTCTTAC | 29  |
| GTCTTAG | 58  |
| GTCTTAT | 36  |
| GTCTTCA | 47  |
| GTCTTCC | 94  |
| GTCTTCG | 61  |
| GTCTTCT | 69  |
| GTCTTGA | 43  |
| GTCTTGC | 54  |
| GTCTTGG | 65  |
| GTCTTGT | 97  |
| GTCTTTA | 58  |
| GTCTTTC | 69  |
| GTCTTTG | 144 |
| GTCTTTT | 112 |
| GTGAAAA | 87  |
| GTGAAAC | 43  |
| GTGAAAG | 29  |
| GTGAAAT | 51  |
| GTGAACA | 65  |
| GTGAACA | 65  |
| GTGAACG | 29  |
| GTGAACT | 72  |
| GTGAAGA | 97  |
| GTGAAGC | 76  |
| GTGAAGG | 51  |
| GTGAAGT | 65  |
| GTGAATA | 65  |
| GTGAATC | 72  |
| GTGAATG | 58  |
| GTGAATT | 90  |
| GTGACAA | 97  |
| GTGACAC | 47  |
| GTGACAG | 40  |
| GTGACAT | 54  |
| GTGACCA | 69  |
| GTGACCC | 25  |
| GTGACCG | 11  |
| GTGACCT | 29  |
| GTGACGA | 54  |
| GTGACGC | 22  |
| GTGACGG | 43  |
| GTGACGT | 40  |

|         |     |
|---------|-----|
| GTGACTA | 58  |
| GTGACTC | 18  |
| GTGACTG | 61  |
| GTGACTT | 32  |
| GTGAGAA | 58  |
| GTGAGAC | 40  |
| GTGAGAG | 83  |
| GTGAGAT | 76  |
| GTGAGCA | 51  |
| GTGAGCC | 65  |
| GTGAGCG | 36  |
| GTGAGCT | 61  |
| GTGAGGA | 51  |
| GTGAGGC | 32  |
| GTGAGGG | 22  |
| GTGAGGT | 36  |
| GTGAGTA | 29  |
| GTGAGTC | 11  |
| GTGAGTG | 76  |
| GTGAGTT | 94  |
| GTGATAA | 51  |
| GTGATAC | 47  |
| GTGATAG | 51  |
| GTGATAT | 51  |
| GTGATCA | 61  |
| GTGATCC | 36  |
| GTGATCG | 43  |
| GTGATCT | 51  |
| GTGATGA | 112 |
| GTGATGC | 40  |
| GTGATGG | 94  |
| GTGATGT | 83  |
| GTGATTA | 51  |
| GTGATTC | 36  |
| GTGATTG | 69  |
| GTGATTT | 133 |
| GTGCAAA | 105 |
| GTGCAAC | 90  |
| GTGCAAG | 76  |
| GTGCAAT | 32  |
| GTGCACA | 65  |
| GTGCACC | 115 |
| GTGCACG | 40  |
| GTGCACT | 58  |
| GTGCAGA | 51  |
| GTGCAGC | 58  |
| GTGCAGG | 83  |
| GTGCAGT | 65  |
| GTGCATA | 72  |
| GTGCATC | 54  |
| GTGCATG | 123 |
| GTGCATT | 112 |

|         |     |
|---------|-----|
| GTGCCAA | 69  |
| GTGCCAC | 40  |
| GTGCCAG | 69  |
| GTGCCAT | 69  |
| GTGCCA  | 40  |
| GTGCCCC | 36  |
| GTGCCCG | 29  |
| GTGCCCT | 72  |
| GTGCCGA | 4   |
| GTCCGC  | 47  |
| GTCCGG  | 51  |
| GTCCGT  | 43  |
| GTCCCTA | 36  |
| GTCCCTC | 51  |
| GTCCCTG | 61  |
| GTCCCTT | 51  |
| GTCCGAA | 29  |
| GTCCGAC | 25  |
| GTCCGAG | 43  |
| GTCCGAT | 25  |
| GTCCGCA | 47  |
| GTCCGCC | 79  |
| GTCCGCG | 58  |
| GTCCGCT | 32  |
| GTCCGGA | 32  |
| GTCCGGC | 76  |
| GTCCGGG | 43  |
| GTCCGGT | 43  |
| GTCCGTA | 14  |
| GTCCGTC | 25  |
| GTCCGTG | 83  |
| GTCCGTT | 40  |
| GTCTAA  | 76  |
| GTCTAC  | 58  |
| GTCTAG  | 61  |
| GTCTAT  | 65  |
| GTCTCA  | 76  |
| GTCTCC  | 40  |
| GTCTCG  | 43  |
| GTCTCT  | 101 |
| GTCTGA  | 40  |
| GTCTGC  | 40  |
| GTCTGG  | 40  |
| GTCTGT  | 43  |
| GTCTTA  | 69  |
| GTCTTC  | 61  |
| GTCTTG  | 87  |
| GTCTTT  | 61  |
| GTGAAA  | 47  |
| GTGGAAC | 36  |
| GTGGAAG | 76  |
| GTGGAAT | 54  |

|         |     |
|---------|-----|
| GTGGACA | 51  |
| GTGGACC | 51  |
| GTGGACG | 47  |
| GTGGACT | 58  |
| GTGGAGA | 112 |
| GTGGAGC | 65  |
| GTGGAGG | 79  |
| GTGGAGT | 51  |
| GTGGATA | 36  |
| GTGGATC | 54  |
| GTGGATG | 108 |
| GTGGATT | 51  |
| GTGGCAA | 32  |
| GTGGCAC | 83  |
| GTGGCAG | 40  |
| GTGGCAT | 94  |
| GTGGCCA | 76  |
| GTGGCCC | 54  |
| GTGGCCG | 47  |
| GTGGCCT | 69  |
| GTGGCGA | 36  |
| GTGGCGC | 72  |
| GTGGCGG | 72  |
| GTGGCGT | 51  |
| GTGGCTA | 58  |
| GTGGCTC | 51  |
| GTGGCTG | 54  |
| GTGGCTT | 43  |
| GTGGGAA | 54  |
| GTGGGAC | 22  |
| GTGGGAG | 51  |
| GTGGGAT | 29  |
| GTGGGCA | 36  |
| GTGGGCC | 61  |
| GTGGGCG | 43  |
| GTGGGCT | 32  |
| GTGGGGA | 47  |
| GTGGGGC | 51  |
| GTGGGGG | 69  |
| GTGGGGT | 69  |
| GTGGGTA | 29  |
| GTGGGTC | 32  |
| GTGGGTG | 61  |
| GTGGGTT | 76  |
| GTGGTAA | 25  |
| GTGGTAA | 25  |
| GTGGTAC | 43  |
| GTGGTAT | 87  |
| GTGGTCA | 51  |
| GTGGTCC | 58  |
| GTGGTCG | 40  |
| GTGGTCT | 40  |

|         |     |
|---------|-----|
| GTGGTGA | 76  |
| GTGGTGC | 97  |
| GTGGTGG | 144 |
| GTGGTGT | 72  |
| GTGGTTA | 36  |
| GTGGTTC | 58  |
| GTGGTTG | 94  |
| GTGGTTT | 83  |
| GTGTAAG | 40  |
| GTGTAAC | 36  |
| GTGTAAT | 58  |
| GTGTACA | 69  |
| GTGTACC | 43  |
| GTGTACG | 69  |
| GTGTACT | 54  |
| GTGTAGA | 69  |
| GTGTAGC | 58  |
| GTGTAGG | 43  |
| GTGTAGT | 69  |
| GTGTATA | 79  |
| GTGTATC | 32  |
| GTGTATG | 79  |
| GTGTATT | 51  |
| GTGTCAA | 76  |
| GTGTCAC | 69  |
| GTGTCAG | 40  |
| GTGTCAT | 72  |
| GTGTCCA | 47  |
| GTGTCCC | 32  |
| GTGTCCG | 72  |
| GTGTCCT | 25  |
| GTGTCGA | 36  |
| GTGTCGA | 36  |
| GTGTCGC | 47  |
| GTGTCGG | 61  |
| GTGTCTA | 72  |
| GTGTCTC | 108 |
| GTGTCTG | 47  |
| GTGTCTT | 72  |
| GTGTGAA | 36  |
| GTGTGAC | 51  |
| GTGTGAG | 51  |
| GTGTGAT | 76  |
| GTGTGCA | 108 |
| GTGTGCC | 40  |
| GTGTGCG | 69  |
| GTGTGCT | 54  |
| GTGTGGA | 65  |
| GTGTGGC | 87  |
| GTGTGGG | 36  |
| GTGTGGT | 65  |

|          |     |
|----------|-----|
| GTGTGTA  | 83  |
| GTGTGTC  | 72  |
| GTGTGTG  | 87  |
| GTGTGTT  | 83  |
| GTGTTAA  | 47  |
| GTGTTAC  | 54  |
| GTGTTAG  | 54  |
| GTGTTAT  | 54  |
| GTGTTCA  | 79  |
| GTGTTCC  | 47  |
| GTGTTCCG | 32  |
| GTGTTCT  | 83  |
| GTGTTGA  | 76  |
| GTGTTGC  | 97  |
| GTGTTGG  | 72  |
| GTGTTGT  | 126 |
| GTGTTTA  | 54  |
| GTGTTTC  | 76  |
| GTGTTTG  | 115 |
| GTGTTTT  | 130 |
| GTTAAAA  | 87  |
| GTTAAAC  | 47  |
| GTTAAAG  | 58  |
| GTTAAAT  | 72  |
| GTTAACA  | 40  |
| GTTAACC  | 32  |
| GTTAACG  | 22  |
| GTTAACT  | 18  |
| GTTAAGA  | 47  |
| GTTAAGC  | 11  |
| GTTAAGG  | 32  |
| GTTAAGT  | 47  |
| GTTAATA  | 54  |
| GTTAATC  | 43  |
| GTTAATG  | 72  |
| GTTAATT  | 79  |
| GTTACAA  | 61  |
| GTTACAC  | 32  |
| GTTACAG  | 36  |
| GTTACAT  | 54  |
| GTTACCA  | 18  |
| GTTACCC  | 65  |
| GTTACCG  | 25  |
| GTTACCT  | 14  |
| GTTACGA  | 22  |
| GTTACGC  | 7   |
| GTTACGG  | 22  |
| GTTACGT  | 32  |
| GTTACTA  | 43  |
| GTTACTC  | 29  |
| GTTACTG  | 47  |
| GTTACTT  | 43  |



|         |     |
|---------|-----|
| GTTAGAA | 29  |
| GTTAGAC | 54  |
| GTTAGAG | 29  |
| GTTAGAT | 65  |
| GTTAGCA | 51  |
| GTTAGCC | 36  |
| GTTAGCG | 36  |
| GTTAGCT | 61  |
| GTTAGGA | 36  |
| GTTAGGC | 32  |
| GTTAGGG | 40  |
| GTTAGGT | 54  |
| GTTAGTA | 54  |
| GTTAGTC | 69  |
| GTTAGTG | 43  |
| GTTAGTT | 65  |
| GTTATAA | 47  |
| GTTATAC | 22  |
| GTTATAG | 58  |
| GTTATAT | 94  |
| GTTATCA | 40  |
| GTTATCC | 32  |
| GTTATCG | 43  |
| GTTATCT | 72  |
| GTTATGA | 36  |
| GTTATGC | 43  |
| GTTATGG | 36  |
| GTTATGT | 72  |
| GTTATTA | 69  |
| GTTATTC | 36  |
| GTTATTG | 61  |
| GTTATTT | 108 |
| GTTCAAA | 72  |
| GTTCAAC | 36  |
| GTTCAAG | 58  |
| GTTCAAT | 58  |
| GTTCACA | 58  |
| GTTCACC | 65  |
| GTTCACG | 32  |
| GTTCACT | 58  |
| GTTCAGA | 51  |
| GTTCAGC | 32  |
| GTTCAGG | 32  |
| GTTCAGT | 58  |
| GTTCATA | 54  |
| GTTCATC | 94  |
| GTTCATG | 97  |
| GTTCATT | 69  |
| GTTCCAA | 72  |
| GTTCCAC | 40  |
| GTTCCAG | 51  |
| GTTCCAT | 51  |

|         |     |
|---------|-----|
| GTTCCCA | 40  |
| GTTCCCC | 43  |
| GTTCCCG | 22  |
| GTTCCCT | 43  |
| GTTCCGA | 22  |
| GTTCCGC | 32  |
| GTTCCGG | 22  |
| GTTCCGT | 18  |
| GTTCCTA | 58  |
| GTTCCTC | 29  |
| GTTCCTG | 29  |
| GTTCCTT | 97  |
| GTTCGAA | 36  |
| GTTCGAC | 14  |
| GTTCGAG | 40  |
| GTTCGAT | 58  |
| GTTCGCA | 22  |
| GTTCGCA | 22  |
| GTTCGCC | 58  |
| GTTCGCG | 7   |
| GTTCGGA | 25  |
| GTTCGGC | 32  |
| GTTCGGG | 14  |
| GTTCGGT | 61  |
| GTTCGTA | 18  |
| GTTCGTC | 69  |
| GTTCGTG | 79  |
| GTTCGTT | 79  |
| GTTCTAA | 51  |
| GTTCTAC | 54  |
| GTTCTAG | 69  |
| GTTCTAT | 61  |
| GTTCTCA | 61  |
| GTTCTCC | 54  |
| GTTCTCG | 22  |
| GTTCTCT | 83  |
| GTTCTGA | 40  |
| GTTCTGC | 36  |
| GTTCTGG | 40  |
| GTTCTGT | 54  |
| GTTCTTA | 94  |
| GTTCTTC | 87  |
| GTTCTTG | 90  |
| GTTCTTT | 101 |
| GTTGAAA | 87  |
| GTTGAAC | 36  |
| GTTGAAG | 47  |
| GTTGAAT | 72  |
| GTTGACA | 76  |
| GTTGACC | 18  |
| GTTGACG | 36  |
| GTTGACT | 51  |

|          |     |
|----------|-----|
| GTTGAGA  | 47  |
| GTTGAGC  | 69  |
| GTTGAGG  | 69  |
| GTTGAGT  | 40  |
| GTTGATA  | 32  |
| GTTGATC  | 87  |
| GTTGATG  | 79  |
| GTTGATT  | 126 |
| GTTGCAA  | 83  |
| GTTGCAC  | 40  |
| GTTGCAG  | 69  |
| GTTGCAT  | 87  |
| GTTGCCA  | 47  |
| GTTGCCC  | 58  |
| GTTGCCG  | 47  |
| GTTGCCT  | 61  |
| GTTGCGA  | 36  |
| GTTGCGC  | 29  |
| GTTGCGG  | 40  |
| GTTGCGT  | 58  |
| GTTGCTA  | 83  |
| GTTGCTC  | 105 |
| GTTGCTG  | 51  |
| GTTGCTT  | 115 |
| GTTGGAA  | 51  |
| GTTGGAC  | 47  |
| GTTGGAG  | 54  |
| GTTGGAT  | 97  |
| GTTGGCA  | 69  |
| GTTGGCC  | 65  |
| GTTGGCG  | 65  |
| GTTGGCT  | 61  |
| GTTGGGA  | 54  |
| GTTGGGC  | 58  |
| GTTGGGG  | 83  |
| GTTGGGT  | 25  |
| GTTGGTA  | 36  |
| GTTGGTC  | 40  |
| GTTGGTG  | 94  |
| GTTGGTT  | 76  |
| GTTGTAA  | 65  |
| GTTGTAC  | 76  |
| GTTGTAG  | 61  |
| GTTGTAT  | 79  |
| GTTGTCA  | 51  |
| GTTGTCC  | 40  |
| GTTGTCCG | 43  |
| GTTGTCT  | 76  |
| GTTGTGA  | 87  |
| GTTGTGC  | 65  |
| GTTGTGG  | 87  |
| GTTGTGT  | 101 |

|         |     |
|---------|-----|
| GTTGTTA | 51  |
| GTTGTTC | 69  |
| GTTGTTG | 112 |
| GTTGTTT | 97  |
| GTTTAAA | 130 |
| GTTTAAC | 32  |
| GTTTAAG | 76  |
| GTTTAAT | 105 |
| GTTTACA | 54  |
| GTTTACC | 36  |
| GTTTACG | 22  |
| GTTTACT | 61  |
| GTTTAGA | 47  |
| GTTTAGC | 65  |
| GTTTAGG | 65  |
| GTTTAGT | 83  |
| GTTTATA | 97  |
| GTTTATC | 79  |
| GTTTATG | 83  |
| GTTTATT | 123 |
| GTTTCAA | 115 |
| GTTTCAC | 47  |
| GTTTCAG | 32  |
| GTTTCAT | 83  |
| GTTTCCA | 123 |
| GTTTCCC | 54  |
| GTTTCCG | 29  |
| GTTTCCT | 87  |
| GTTTCGA | 47  |
| GTTTCGC | 32  |
| GTTTCGG | 36  |
| GTTTCGT | 40  |
| GTTTCTA | 90  |
| GTTTCTC | 108 |
| GTTTCTG | 51  |
| GTTTCTT | 137 |
| GTTTGAA | 87  |
| GTTTGAC | 65  |
| GTTTGAG | 94  |
| GTTTGAT | 101 |
| GTTTGCA | 97  |
| GTTTGCC | 51  |
| GTTTGCG | 18  |
| GTTTGCT | 79  |
| GTTTGGA | 130 |
| GTTTGGC | 90  |
| GTTTGGG | 47  |
| GTTTGGT | 130 |
| GTTTGTA | 94  |
| GTTTGTA | 94  |
| GTTTGTC | 51  |
| GTTTGTT | 184 |

|         |     |
|---------|-----|
| GTTTTAA | 130 |
| GTTTTAC | 69  |
| GTTTTAG | 112 |
| GTTTTAT | 130 |
| GTTTTCA | 58  |
| GTTTTCC | 76  |
| GTTTTCG | 58  |
| GTTTTCT | 115 |
| GTTTTGA | 76  |
| GTTTTGC | 72  |
| GTTTTGG | 105 |
| GTTTTGT | 162 |
| GTTTTTA | 177 |
| GTTTTTC | 101 |
| GTTTTTG | 148 |
| GTTTTTT | 227 |
| TAAAAAA | 386 |
| TAAAAAC | 148 |
| TAAAAAG | 148 |
| TAAAAAT | 263 |
| TAAAACA | 112 |
| TAAAACC | 108 |
| TAAAACG | 43  |
| TAAAACT | 133 |
| TAAAAGA | 119 |
| TAAAAGC | 83  |
| TAAAAGG | 65  |
| TAAAAGT | 79  |
| TAAAATA | 321 |
| TAAAATC | 141 |
| TAAAATG | 170 |
| TAAAATT | 289 |
| TAAACAA | 166 |
| TAAACAC | 61  |
| TAAACAG | 65  |
| TAAACAT | 141 |
| TAAACCA | 83  |
| TAAACCC | 54  |
| TAAACCG | 32  |
| TAAACCT | 83  |
| TAAACGA | 22  |
| TAAACGC | 22  |
| TAAACGG | 32  |
| TAAACGT | 36  |
| TAAACTA | 133 |
| TAAACTC | 76  |
| TAAACTG | 76  |
| TAAACTT | 130 |
| TAAAGAA | 137 |
| TAAAGAC | 47  |
| TAAAGAG | 83  |
| TAAAGAT | 105 |

|         |     |
|---------|-----|
| TAAAGCA | 119 |
| TAAAGCC | 51  |
| TAAAGCG | 58  |
| TAAAGCT | 65  |
| TAAAGGA | 36  |
| TAAAGGA | 36  |
| TAAAGGC | 51  |
| TAAAGGG | 65  |
| TAAAGTA | 94  |
| TAAAGTC | 72  |
| TAAAGTG | 61  |
| TAAAGTT | 105 |
| TAAATAA | 267 |
| TAAATAC | 144 |
| TAAATAG | 115 |
| TAAATAT | 307 |
| TAAATCA | 101 |
| TAAATCC | 83  |
| TAAATCG | 47  |
| TAAATCT | 94  |
| TAAATGA | 126 |
| TAAATGC | 94  |
| TAAATGG | 79  |
| TAAATGT | 173 |
| TAAATTA | 253 |
| TAAATTC | 108 |
| TAAATTG | 97  |
| TAAATTT | 220 |
| TAACAAA | 144 |
| TAACAAC | 76  |
| TAACAAG | 76  |
| TAACAAT | 83  |
| TAACACA | 87  |
| TAACACC | 22  |
| TAACACG | 25  |
| TAACACT | 69  |
| TAACAGA | 69  |
| TAACAGC | 22  |
| TAACAGG | 25  |
| TAACAGT | 47  |
| TAACATA | 97  |
| TAACATC | 58  |
| TAACATG | 47  |
| TAACATT | 83  |
| TAACCAA | 58  |
| TAACCAC | 36  |
| TAACCAG | 22  |
| TAACCAT | 90  |
| TAACCCA | 47  |
| TAACCCC | 32  |
| TAACCCG | 29  |
| TAACCCT | 43  |

|         |     |
|---------|-----|
| TAACCGA | 40  |
| TAACCGC | 29  |
| TAACCGG | 43  |
| TAACCGT | 22  |
| TAACCTA | 43  |
| TAACCTC | 25  |
| TAACCTG | 18  |
| TAACCTT | 61  |
| TAACGAA | 43  |
| TAACGAC | 18  |
| TAACGAG | 51  |
| TAACGAT | 32  |
| TAACGCA | 11  |
| TAACGCC | 7   |
| TAACGCG | 14  |
| TAACGCT | 22  |
| TAACGGA | 40  |
| TAACGGC | 40  |
| TAACGGG | 47  |
| TAACGGT | 11  |
| TAACGTA | 36  |
| TAACGTC | 7   |
| TAACGTG | 47  |
| TAACGTT | 22  |
| TAACTAA | 72  |
| TAACTAC | 54  |
| TAACTAG | 36  |
| TAACTAT | 79  |
| TAACTCA | 58  |
| TAACTCC | 43  |
| TAACTCG | 36  |
| TAACTCT | 69  |
| TAACTGA | 32  |
| TAACTGC | 43  |
| TAACTGG | 43  |
| TAACTGT | 51  |
| TAACTTA | 51  |
| TAACTTC | 61  |
| TAACTTG | 58  |
| TAACTTT | 101 |
| TAAGAAA | 115 |
| TAAGAAC | 43  |
| TAAGAAG | 72  |
| TAAGAAT | 54  |
| TAAGACA | 47  |
| TAAGACC | 36  |
| TAAGACG | 25  |
| TAAGACT | 36  |
| TAAGAGA | 69  |
| TAAGAGA | 69  |
| TAAGAGG | 65  |
| TAAGAGT | 61  |

|         |     |
|---------|-----|
| TAAGATA | 94  |
| TAAGATC | 40  |
| TAAGATG | 69  |
| TAAGATT | 65  |
| TAAGCAA | 72  |
| TAAGCAC | 54  |
| TAAGCAG | 25  |
| TAAGCAT | 61  |
| TAAGCCA | 43  |
| TAAGCCC | 7   |
| TAAGCCG | 29  |
| TAAGCCT | 40  |
| TAAGCGA | 36  |
| TAAGCGC | 18  |
| TAAGCGG | 11  |
| TAAGCGT | 11  |
| TAAGCTA | 51  |
| TAAGCTC | 22  |
| TAAGCTG | 32  |
| TAAGCTT | 65  |
| TAAGGAA | 69  |
| TAAGGAC | 29  |
| TAAGGAG | 51  |
| TAAGGAT | 43  |
| TAAGGCA | 40  |
| TAAGGCC | 29  |
| TAAGGCG | 25  |
| TAAGGCT | 47  |
| TAAGGGA | 58  |
| TAAGGGC | 47  |
| TAAGGGG | 40  |
| TAAGGGT | 61  |
| TAAGGTA | 36  |
| TAAGGTC | 47  |
| TAAGGTG | 65  |
| TAAGGTT | 72  |
| TAAGTAA | 51  |
| TAAGTAC | 51  |
| TAAGTAG | 69  |
| TAAGTAT | 72  |
| TAAGTCA | 65  |
| TAAGTCC | 11  |
| TAAGTCG | 22  |
| TAAGTCT | 54  |
| TAAGTGA | 69  |
| TAAGTGC | 54  |
| TAAGTGG | 47  |
| TAAGTGT | 58  |
| TAAGTTA | 76  |
| TAAGTTC | 22  |
| TAAGTTG | 61  |
| TAAGTTT | 137 |



|         |     |
|---------|-----|
| TAATAAA | 184 |
| TAATAAA | 184 |
| TAATAAC | 69  |
| TAATAAT | 245 |
| TAATACA | 87  |
| TAATACC | 61  |
| TAATACG | 11  |
| TAATACT | 126 |
| TAATAGA | 76  |
| TAATAGC | 47  |
| TAATAGG | 36  |
| TAATAGT | 105 |
| TAATATA | 173 |
| TAATATC | 90  |
| TAATATG | 97  |
| TAATATT | 152 |
| TAATCAA | 90  |
| TAATCAC | 65  |
| TAATCAG | 25  |
| TAATCAT | 61  |
| TAATCCA | 58  |
| TAATCCC | 47  |
| TAATCCG | 43  |
| TAATCCT | 32  |
| TAATCGA | 32  |
| TAATCGC | 25  |
| TAATCGG | 32  |
| TAATCGT | 32  |
| TAATCTA | 123 |
| TAATCTC | 47  |
| TAATCTG | 43  |
| TAATCTT | 133 |
| TAATGAA | 87  |
| TAATGAC | 51  |
| TAATGAG | 36  |
| TAATGAT | 108 |
| TAATGCA | 97  |
| TAATGCC | 54  |
| TAATGCG | 29  |
| TAATGCT | 87  |
| TAATGGA | 43  |
| TAATGGC | 29  |
| TAATGGG | 47  |
| TAATGGT | 58  |
| TAATGTA | 58  |
| TAATGTC | 32  |
| TAATGTG | 72  |
| TAATGTT | 126 |
| TAATTAA | 170 |
| TAATTAC | 65  |
| TAATTAG | 130 |
| TAATTAT | 195 |

|          |     |
|----------|-----|
| TAATTCA  | 123 |
| TAATTCC  | 47  |
| TAATTCCG | 36  |
| TAATTCT  | 79  |
| TAATTGA  | 87  |
| TAATTGC  | 94  |
| TAATTGG  | 54  |
| TAATTGT  | 90  |
| TAATTTA  | 206 |
| TAATTTTC | 115 |
| TAATTTG  | 152 |
| TAATTTT  | 292 |
| TACAAAA  | 152 |
| TACAAAC  | 87  |
| TACAAAG  | 83  |
| TACAAAT  | 123 |
| TACAACA  | 112 |
| TACAACC  | 65  |
| TACAACG  | 18  |
| TACAACT  | 51  |
| TACAAGA  | 72  |
| TACAAGC  | 61  |
| TACAAGG  | 32  |
| TACAAGT  | 90  |
| TACAATA  | 108 |
| TACAATC  | 40  |
| TACAATG  | 32  |
| TACAATT  | 76  |
| TACACAA  | 47  |
| TACACAC  | 51  |
| TACACAG  | 54  |
| TACACAT  | 79  |
| TACACCA  | 65  |
| TACACCC  | 25  |
| TACACCG  | 36  |
| TACACCT  | 58  |
| TACACGA  | 25  |
| TACACGC  | 29  |
| TACACGG  | 18  |
| TACACGT  | 40  |
| TACACTA  | 58  |
| TACACTC  | 51  |
| TACACTG  | 58  |
| TACACTT  | 76  |
| TACAGAA  | 72  |
| TACAGAC  | 47  |
| TACAGAG  | 43  |
| TACAGAT  | 51  |
| TACAGCA  | 29  |
| TACAGCC  | 58  |
| TACAGCG  | 14  |
| TACAGCT  | 43  |

|         |     |
|---------|-----|
| TACAGGA | 18  |
| TACAGGC | 18  |
| TACAGGG | 43  |
| TACAGGT | 40  |
| TACAGTA | 61  |
| TACAGTC | 18  |
| TACAGTG | 40  |
| TACAGTT | 43  |
| TACATAA | 90  |
| TACATAC | 72  |
| TACATAG | 61  |
| TACATAT | 137 |
| TACATCA | 65  |
| TACATCC | 61  |
| TACATCG | 18  |
| TACATCT | 79  |
| TACATGA | 72  |
| TACATGC | 72  |
| TACATGG | 76  |
| TACATGT | 126 |
| TACATTA | 54  |
| TACATTC | 29  |
| TACATTG | 54  |
| TACATTT | 141 |
| TACCAAA | 148 |
| TACCAAC | 40  |
| TACCAAG | 76  |
| TACCAAT | 76  |
| TACCACA | 54  |
| TACCACC | 40  |
| TACCACG | 14  |
| TACCACT | 51  |
| TACCAGA | 47  |
| TACCAGC | 54  |
| TACCAGG | 14  |
| TACCAGT | 29  |
| TACCATA | 54  |
| TACCATC | 51  |
| TACCATG | 51  |
| TACCATT | 65  |
| TACCCAA | 76  |
| TACCCAC | 36  |
| TACCCAG | 29  |
| TACCCAT | 65  |
| TACCCCA | 51  |
| TACCCCC | 51  |
| TACCCCG | 40  |
| TACCCCT | 43  |
| TACCCGA | 29  |
| TACCCGC | 11  |
| TACCCGG | 11  |
| TACCCGT | 11  |

|         |     |
|---------|-----|
| TACCCTA | 36  |
| TACCCTA | 36  |
| TACCCTC | 51  |
| TACCCTG | 22  |
| TACCGAA | 22  |
| TACCGAC | 25  |
| TACCGAG | 36  |
| TACCGAT | 14  |
| TACCGCA | 14  |
| TACCGCC | 32  |
| TACCGCG | 22  |
| TACCGCT | 7   |
| TACCGGA | 25  |
| TACCGGC | 43  |
| TACCGGG | 11  |
| TACCGGT | 36  |
| TACCGTA | 29  |
| TACCGTC | 25  |
| TACCGTG | 25  |
| TACCGTT | 29  |
| TACCTAA | 47  |
| TACCTAC | 54  |
| TACCTAG | 40  |
| TACCTAT | 51  |
| TACCTCA | 40  |
| TACCTCC | 40  |
| TACCTCG | 43  |
| TACCTCT | 51  |
| TACCTGA | 40  |
| TACCTGC | 22  |
| TACCTGG | 7   |
| TACCTGT | 43  |
| TACCTTA | 32  |
| TACCTTC | 54  |
| TACCTTG | 40  |
| TACCTTT | 112 |
| TACGAAA | 54  |
| TACGAAC | 22  |
| TACGAAG | 22  |
| TACGAAT | 7   |
| TACGACA | 36  |
| TACGACC | 18  |
| TACGACG | 32  |
| TACGACT | 32  |
| TACGAGA | 22  |
| TACGAGC | 7   |
| TACGAGG | 11  |
| TACGAGT | 25  |
| TACGATA | 32  |
| TACGATC | 22  |
| TACGATG | 29  |
| TACGATT | 36  |

|          |     |
|----------|-----|
| TACGCAA  | 32  |
| TACGCAC  | 7   |
| TACGCAG  | 11  |
| TACGCAT  | 29  |
| TACGCCA  | 22  |
| TACGCCC  | 36  |
| TACGCCG  | 40  |
| TACGCCT  | 25  |
| TACGCGA  | 18  |
| TACGCGC  | 25  |
| TACGCGG  | 7   |
| TACGCGT  | 29  |
| TACGCTA  | 22  |
| TACGCTC  | 32  |
| TACGCTG  | 11  |
| TACGCTT  | 11  |
| TACGGAA  | 18  |
| TACGGAC  | 4   |
| TACGGAG  | 51  |
| TACGGAT  | 25  |
| TACGGCA  | 14  |
| TACGGCC  | 25  |
| TACGGCG  | 7   |
| TACGGCT  | 25  |
| TACGGGA  | 18  |
| TACGGGC  | 32  |
| TACGGGG  | 7   |
| TACGGGT  | 25  |
| TACGGTA  | 25  |
| TACGGTC  | 22  |
| TACGGTG  | 22  |
| TACGGTT  | 32  |
| TACGTAA  | 40  |
| TACGTAC  | 87  |
| TACGTAG  | 51  |
| TACGTAT  | 40  |
| TACGTCA  | 32  |
| TACGTCC  | 18  |
| TACGTCCG | 22  |
| TACGTCT  | 18  |
| TACGTGA  | 40  |
| TACGTGC  | 61  |
| TACGTGG  | 65  |
| TACGTGT  | 47  |
| TACGTTA  | 11  |
| TACGTTA  | 11  |
| TACGTTG  | 32  |
| TACGTTT  | 29  |
| TACTAAA  | 115 |
| TACTAAC  | 51  |
| TACTAAG  | 43  |
| TACTAAT  | 72  |

|         |     |
|---------|-----|
| TACTACA | 61  |
| TACTACC | 54  |
| TACTACG | 29  |
| TACTACT | 112 |
| TACTAGA | 79  |
| TACTAGC | 65  |
| TACTAGG | 51  |
| TACTAGT | 87  |
| TACTATA | 87  |
| TACTATC | 29  |
| TACTATG | 61  |
| TACTATT | 101 |
| TACTCAA | 47  |
| TACTCAC | 61  |
| TACTCAG | 29  |
| TACTCAT | 94  |
| TACTCCA | 58  |
| TACTCCC | 43  |
| TACTCCG | 51  |
| TACTCCT | 105 |
| TACTCGA | 58  |
| TACTCGC | 25  |
| TACTCGG | 18  |
| TACTCGT | 32  |
| TACTCTA | 72  |
| TACTCTC | 32  |
| TACTCTG | 54  |
| TACTCTT | 69  |
| TACTGAA | 69  |
| TACTGAC | 51  |
| TACTGAG | 32  |
| TACTGAT | 58  |
| TACTGCA | 29  |
| TACTGCC | 36  |
| TACTGCG | 29  |
| TACTGCT | 61  |
| TACTGGA | 29  |
| TACTGGC | 22  |
| TACTGGG | 32  |
| TACTGGT | 40  |
| TACTGTA | 72  |
| TACTGTC | 25  |
| TACTGTG | 40  |
| TACTGTT | 51  |
| TACTTAA | 72  |
| TACTTAC | 36  |
| TACTTAG | 40  |
| TACTTAT | 79  |
| TACTTCA | 43  |
| TACTTCA | 43  |
| TACTTCC | 43  |
| TACTTCT | 54  |

|         |     |
|---------|-----|
| TACTTGA | 40  |
| TACTTGC | 90  |
| TACTTGG | 47  |
| TACTTGT | 87  |
| TACTTTA | 54  |
| TACTTTC | 47  |
| TACTTTG | 72  |
| TACTTTT | 123 |
| TAGAAAA | 202 |
| TAGAAAC | 97  |
| TAGAAAG | 65  |
| TAGAAAT | 170 |
| TAGAACA | 47  |
| TAGAACC | 47  |
| TAGAACG | 22  |
| TAGAACT | 58  |
| TAGAAGA | 65  |
| TAGAAGC | 36  |
| TAGAAGG | 54  |
| TAGAAGT | 51  |
| TAGAATA | 115 |
| TAGAATC | 43  |
| TAGAATG | 83  |
| TAGAATT | 72  |
| TAGACAA | 54  |
| TAGACAA | 54  |
| TAGACAG | 43  |
| TAGACAT | 72  |
| TAGACCA | 61  |
| TAGACCC | 43  |
| TAGACCG | 18  |
| TAGACCT | 54  |
| TAGACGA | 51  |
| TAGACGC | 18  |
| TAGACGG | 32  |
| TAGACGT | 22  |
| TAGACTA | 90  |
| TAGACTC | 43  |
| TAGACTG | 47  |
| TAGACTT | 36  |
| TAGAGAA | 101 |
| TAGAGAC | 54  |
| TAGAGAG | 115 |
| TAGAGAT | 126 |
| TAGAGCA | 87  |
| TAGAGCC | 58  |
| TAGAGCG | 22  |
| TAGAGCT | 76  |
| TAGAGGA | 87  |
| TAGAGGC | 14  |
| TAGAGGG | 47  |
| TAGAGGT | 61  |

|         |     |
|---------|-----|
| TAGAGTA | 90  |
| TAGAGTC | 47  |
| TAGAGTG | 65  |
| TAGAGTT | 65  |
| TAGATAA | 90  |
| TAGATAC | 65  |
| TAGATAG | 69  |
| TAGATAT | 101 |
| TAGATCA | 51  |
| TAGATCC | 105 |
| TAGATCG | 29  |
| TAGATCT | 69  |
| TAGATGA | 79  |
| TAGATGC | 61  |
| TAGATGG | 36  |
| TAGATGT | 72  |
| TAGATTA | 123 |
| TAGATTC | 54  |
| TAGATTG | 47  |
| TAGATTT | 126 |
| TAGCAAA | 101 |
| TAGCAAC | 69  |
| TAGCAAG | 87  |
| TAGCAAT | 69  |
| TAGCACA | 58  |
| TAGCACC | 29  |
| TAGCACG | 51  |
| TAGCACT | 54  |
| TAGCAGA | 72  |
| TAGCAGC | 51  |
| TAGCAGG | 29  |
| TAGCAGT | 32  |
| TAGCATA | 79  |
| TAGCATC | 47  |
| TAGCATG | 61  |
| TAGCATT | 69  |
| TAGCCAA | 90  |
| TAGCCAC | 65  |
| TAGCCAG | 54  |
| TAGCCAT | 51  |
| TAGCCCA | 69  |
| TAGCCCC | 58  |
| TAGCCCG | 54  |
| TAGCCCT | 36  |
| TAGCCGA | 29  |
| TAGCCGC | 43  |
| TAGCCGG | 18  |
| TAGCCGT | 54  |
| TAGCCTA | 76  |
| TAGCCTC | 65  |
| TAGCCTG | 32  |
| TAGCCTT | 58  |



|         |     |
|---------|-----|
| TAGCGAA | 32  |
| TAGCGAC | 36  |
| TAGCGAG | 22  |
| TAGCGAT | 14  |
| TAGCGCA | 18  |
| TAGCGCC | 11  |
| TAGCGCG | 25  |
| TAGCGCT | 11  |
| TAGCGGA | 36  |
| TAGCGGC | 43  |
| TAGCGGG | 18  |
| TAGCGGT | 25  |
| TAGCGTA | 22  |
| TAGCGTC | 29  |
| TAGCGTG | 29  |
| TAGCGTT | 43  |
| TAGCTAA | 90  |
| TAGCTAC | 87  |
| TAGCTAG | 166 |
| TAGCTAT | 126 |
| TAGCTCA | 58  |
| TAGCTCC | 54  |
| TAGCTCG | 69  |
| TAGCTCT | 51  |
| TAGCTGA | 69  |
| TAGCTGC | 76  |
| TAGCTGG | 36  |
| TAGCTGT | 47  |
| TAGCTTA | 54  |
| TAGCTTC | 76  |
| TAGCTTG | 72  |
| TAGCTTT | 115 |
| TAGGAAA | 97  |
| TAGGAAC | 72  |
| TAGGAAG | 61  |
| TAGGAAT | 65  |
| TAGGACA | 54  |
| TAGGACC | 25  |
| TAGGACG | 22  |
| TAGGACT | 47  |
| TAGGAGA | 43  |
| TAGGAGC | 43  |
| TAGGAGG | 32  |
| TAGGAGT | 51  |
| TAGGATA | 54  |
| TAGGATC | 36  |
| TAGGATG | 32  |
| TAGGATT | 65  |
| TAGGCAA | 43  |
| TAGGCAC | 32  |
| TAGGCAG | 25  |
| TAGGCAT | 69  |

|          |     |
|----------|-----|
| TAGGCCA  | 69  |
| TAGGCCC  | 29  |
| TAGGCCG  | 32  |
| TAGGCCT  | 47  |
| TAGGCGA  | 43  |
| TAGGCGC  | 14  |
| TAGGCGG  | 43  |
| TAGGCGT  | 25  |
| TAGGCTA  | 29  |
| TAGGCTC  | 25  |
| TAGGCTG  | 25  |
| TAGGCTT  | 69  |
| TAGGGAA  | 25  |
| TAGGGAC  | 40  |
| TAGGGAG  | 43  |
| TAGGGAT  | 36  |
| TAGGGCA  | 43  |
| TAGGGCC  | 36  |
| TAGGGCG  | 22  |
| TAGGGCT  | 51  |
| TAGGGGA  | 61  |
| TAGGGGC  | 54  |
| TAGGGGG  | 32  |
| TAGGGGT  | 43  |
| TAGGGTA  | 51  |
| TAGGGTC  | 14  |
| TAGGGTG  | 54  |
| TAGGGTT  | 51  |
| TAGGTAA  | 29  |
| TAGGTAC  | 40  |
| TAGGTAG  | 29  |
| TAGGTAT  | 47  |
| TAGGTCA  | 47  |
| TAGGTCC  | 14  |
| TAGGTCCG | 32  |
| TAGGTCT  | 51  |
| TAGGTGA  | 79  |
| TAGGTGC  | 36  |
| TAGGTGG  | 47  |
| TAGGTGT  | 58  |
| TAGGTTA  | 40  |
| TAGGTTA  | 40  |
| TAGGTTC  | 43  |
| TAGGTTT  | 79  |
| TAGTAAA  | 112 |
| TAGTAAC  | 32  |
| TAGTAAG  | 61  |
| TAGTAAT  | 83  |
| TAGTACA  | 58  |
| TAGTACC  | 22  |
| TAGTACG  | 22  |
| TAGTACT  | 65  |

|          |     |
|----------|-----|
| TAGTAGA  | 90  |
| TAGTAGC  | 51  |
| TAGTAGG  | 22  |
| TAGTAGT  | 83  |
| TAGTATA  | 108 |
| TAGTATC  | 32  |
| TAGTATG  | 51  |
| TAGTATT  | 54  |
| TAGTCAA  | 61  |
| TAGTCAC  | 51  |
| TAGTCAG  | 40  |
| TAGTCAT  | 72  |
| TAGTCCA  | 83  |
| TAGTCCC  | 32  |
| TAGTCCG  | 29  |
| TAGTCCT  | 43  |
| TAGTCGA  | 25  |
| TAGTCGC  | 11  |
| TAGTCGG  | 18  |
| TAGTCGT  | 29  |
| TAGTCTA  | 47  |
| TAGTCTC  | 76  |
| TAGTCTG  | 25  |
| TAGTCTT  | 72  |
| TAGTGAA  | 61  |
| TAGTGAC  | 51  |
| TAGTGAG  | 76  |
| TAGTGAT  | 69  |
| TAGTGCA  | 54  |
| TAGTGCC  | 51  |
| TAGTGCG  | 25  |
| TAGTGCT  | 69  |
| TAGTGGA  | 83  |
| TAGTGGC  | 47  |
| TAGTGGG  | 36  |
| TAGTGGT  | 72  |
| TAGTGTA  | 61  |
| TAGTGTC  | 47  |
| TAGGTG   | 65  |
| TAGTGTT  | 144 |
| TAGTTAA  | 101 |
| TAGTTAC  | 51  |
| TAGTTAG  | 83  |
| TAGTTAT  | 97  |
| TAGTTCA  | 72  |
| TAGTTCA  | 72  |
| TAGTTCC  | 51  |
| TAGTTCCG | 25  |
| TAGTTGA  | 54  |
| TAGTTGC  | 43  |
| TAGTTGG  | 69  |
| TAGTTGT  | 54  |

|         |     |
|---------|-----|
| TAGTTTA | 101 |
| TAGTTTC | 90  |
| TAGTTTG | 90  |
| TAGTTTT | 112 |
| TATAAAA | 307 |
| TATAAAC | 130 |
| TATAAAG | 87  |
| TATAAAT | 310 |
| TATAACA | 79  |
| TATAACC | 43  |
| TATAACG | 22  |
| TATAACT | 65  |
| TATAAGA | 141 |
| TATAAGC | 69  |
| TATAAGG | 43  |
| TATAAGT | 90  |
| TATAATA | 249 |
| TATAATC | 108 |
| TATAATG | 69  |
| TATAATT | 238 |
| TATACAA | 148 |
| TATACAC | 65  |
| TATACAG | 58  |
| TATACAT | 97  |
| TATACCA | 54  |
| TATACCC | 32  |
| TATACCG | 4   |
| TATACCT | 69  |
| TATACGA | 40  |
| TATACGC | 25  |
| TATACGG | 14  |
| TATACGT | 43  |
| TATACTA | 112 |
| TATACTC | 54  |
| TATACTG | 40  |
| TATACTT | 94  |
| TATAGAA | 130 |
| TATAGAC | 69  |
| TATAGAG | 105 |
| TATAGAT | 115 |
| TATAGCA | 87  |
| TATAGCC | 97  |
| TATAGCG | 32  |
| TATAGCT | 119 |
| TATAGGA | 51  |
| TATAGGC | 29  |
| TATAGGG | 29  |
| TATAGGT | 76  |
| TATAGTA | 79  |
| TATAGTC | 40  |
| TATAGTG | 61  |
| TATAGTT | 97  |

|         |     |
|---------|-----|
| TATATAA | 299 |
| TATATAC | 188 |
| TATATAG | 130 |
| TATATAT | 675 |
| TATATCA | 112 |
| TATATCC | 58  |
| TATATCG | 43  |
| TATATCT | 166 |
| TATATGA | 152 |
| TATATGC | 105 |
| TATATGG | 83  |
| TATATGT | 188 |
| TATATTA | 202 |
| TATATTC | 119 |
| TATATTG | 94  |
| TATATTT | 372 |
| TATCAAA | 119 |
| TATCAAC | 72  |
| TATCAAG | 65  |
| TATCAAT | 94  |
| TATCACA | 79  |
| TATCACC | 58  |
| TATCACG | 32  |
| TATCACT | 76  |
| TATCAGA | 58  |
| TATCAGC | 32  |
| TATCAGG | 32  |
| TATCAGT | 32  |
| TATCATA | 108 |
| TATCATC | 58  |
| TATCATG | 69  |
| TATCATT | 105 |
| TATCCAA | 54  |
| TATCCAC | 54  |
| TATCCAG | 51  |
| TATCCAT | 90  |
| TATCCCA | 32  |
| TATCCCC | 29  |
| TATCCCG | 18  |
| TATCCCT | 76  |
| TATCCGA | 25  |
| TATCCGC | 29  |
| TATCCGG | 32  |
| TATCCGT | 47  |
| TATCCTA | 51  |
| TATCCTC | 51  |
| TATCCTG | 32  |
| TATCCTT | 32  |
| TATCGAA | 43  |
| TATCGAC | 29  |
| TATCGAG | 14  |
| TATCGAT | 40  |

|         |     |
|---------|-----|
| TATCGCA | 14  |
| TATCGCC | 14  |
| TATCGCG | 11  |
| TATCGCT | 29  |
| TATCGGA | 32  |
| TATCGGC | 14  |
| TATCGGG | 22  |
| TATCGGT | 22  |
| TATCGTA | 25  |
| TATCGTC | 14  |
| TATCGTG | 51  |
| TATCGTT | 29  |
| TATCTAA | 94  |
| TATCTAC | 36  |
| TATCTAG | 58  |
| TATCTAT | 130 |
| TATCTCA | 65  |
| TATCTCC | 43  |
| TATCTCG | 29  |
| TATCTCT | 101 |
| TATCTGA | 83  |
| TATCTGC | 25  |
| TATCTGG | 32  |
| TATCTGT | 76  |
| TATCTTA | 101 |
| TATCTTC | 108 |
| TATCTTG | 115 |
| TATCTTT | 126 |
| TATGAAA | 141 |
| TATGAAC | 72  |
| TATGAAG | 58  |
| TATGAAT | 87  |
| TATGACA | 69  |
| TATGACC | 32  |
| TATGACG | 18  |
| TATGACT | 61  |
| TATGAGA | 83  |
| TATGAGA | 83  |
| TATGAGC | 47  |
| TATGAGT | 94  |
| TATGATA | 108 |
| TATGATC | 65  |
| TATGATG | 119 |
| TATGATT | 105 |
| TATGCAA | 83  |
| TATGCAC | 83  |
| TATGCAG | 29  |
| TATGCAT | 130 |
| TATGCCA | 22  |
| TATGCCC | 40  |
| TATGCCG | 54  |
| TATGCCT | 61  |

|          |     |
|----------|-----|
| TATGCGA  | 43  |
| TATGCGC  | 14  |
| TATGCGG  | 14  |
| TATGCGT  | 40  |
| TATGCTA  | 58  |
| TATGCTC  | 51  |
| TATGCTG  | 54  |
| TATGCTT  | 83  |
| TATGGAA  | 61  |
| TATGGAC  | 83  |
| TATGGAG  | 36  |
| TATGGAT  | 90  |
| TATGGCA  | 79  |
| TATGGCC  | 51  |
| TATGGCG  | 36  |
| TATGGCT  | 47  |
| TATGGGA  | 65  |
| TATGGGC  | 18  |
| TATGGGG  | 43  |
| TATGGGT  | 22  |
| TATGGTA  | 51  |
| TATGGTC  | 69  |
| TATGGTG  | 90  |
| TATGGTT  | 87  |
| TATGTAA  | 112 |
| TATGTAC  | 54  |
| TATGTAG  | 47  |
| TATGTAT  | 173 |
| TATGTCA  | 47  |
| TATGTCC  | 43  |
| TATGTCCG | 51  |
| TATGTCT  | 79  |
| TATGTGA  | 94  |
| TATGTGC  | 40  |
| TATGTGG  | 69  |
| TATGTGT  | 123 |
| TATGTTA  | 87  |
| TATGTTC  | 90  |
| TATGTTG  | 144 |
| TATGTTT  | 144 |
| TATTA AA | 220 |
| TATTA AA | 220 |
| TATTAAC  | 47  |
| TATTAAG  | 51  |
| TATTACA  | 108 |
| TATTACC  | 40  |
| TATTACG  | 22  |
| TATTA CT | 90  |
| TATTAGA  | 87  |
| TATTAGC  | 65  |
| TATTAGG  | 61  |
| TATTAGT  | 51  |

|         |     |
|---------|-----|
| TATTATA | 234 |
| TATTATC | 61  |
| TATTATG | 105 |
| TATTATT | 263 |
| TATTCAA | 119 |
| TATTCAC | 76  |
| TATTCAG | 43  |
| TATTCAT | 170 |
| TATTCCA | 51  |
| TATTCCC | 40  |
| TATTCCG | 29  |
| TATTCCT | 79  |
| TATTCGA | 43  |
| TATTCGC | 14  |
| TATTCGG | 11  |
| TATTCGT | 29  |
| TATTCTA | 72  |
| TATTCTC | 90  |
| TATTCTG | 76  |
| TATTCTT | 133 |
| TATTGAA | 101 |
| TATTGAC | 40  |
| TATTGAG | 65  |
| TATTGAT | 87  |
| TATTGCA | 83  |
| TATTGCC | 47  |
| TATTGCG | 4   |
| TATTGCT | 65  |
| TATTGGA | 69  |
| TATTGGC | 43  |
| TATTGGG | 29  |
| TATTGGT | 90  |
| TATTGTA | 58  |
| TATTGTC | 101 |
| TATTGTG | 105 |
| TATTGTT | 148 |
| TATTTAA | 216 |
| TATTTAC | 101 |
| TATTTAG | 155 |
| TATTTAT | 354 |
| TATTTCA | 170 |
| TATTTCC | 83  |
| TATTTCG | 29  |
| TATTTCT | 144 |
| TATTTGA | 152 |
| TATTTGC | 72  |
| TATTTGG | 141 |
| TATTTGT | 166 |
| TATTTTA | 253 |
| TATTTTC | 180 |
| TATTTTG | 220 |
| TATTTTT | 382 |



|         |     |
|---------|-----|
| TCAAAA  | 108 |
| TCAAAC  | 79  |
| TCAAAG  | 69  |
| TCAAAT  | 170 |
| TCAAACA | 141 |
| TCAAACC | 54  |
| TCAAACG | 58  |
| TCAAACT | 119 |
| TCAAAGA | 65  |
| TCAAAGC | 65  |
| TCAAAGG | 90  |
| TCAAAGT | 69  |
| TCAAATA | 155 |
| TCAAATC | 90  |
| TCAAATG | 94  |
| TCAAATT | 148 |
| TCAACAA | 87  |
| TCAACAC | 79  |
| TCAACAG | 61  |
| TCAACAT | 115 |
| TCAACCA | 97  |
| TCAACCC | 61  |
| TCAACCG | 32  |
| TCAACCT | 40  |
| TCAACGA | 51  |
| TCAACGC | 22  |
| TCAACGG | 79  |
| TCAACGT | 14  |
| TCAACTA | 87  |
| TCAACTC | 79  |
| TCAACTG | 25  |
| TCAACTT | 61  |
| TCAAGAA | 97  |
| TCAAGAC | 40  |
| TCAAGAG | 69  |
| TCAAGAT | 97  |
| TCAAGCA | 76  |
| TCAAGCA | 76  |
| TCAAGCG | 36  |
| TCAAGCT | 69  |
| TCAAGGA | 72  |
| TCAAGGC | 36  |
| TCAAGGG | 58  |
| TCAAGGT | 32  |
| TCAAGTA | 54  |
| TCAAGTC | 65  |
| TCAAGTG | 61  |
| TCAAGTT | 76  |
| TCAATAA | 108 |
| TCAATAC | 32  |
| TCAATAG | 43  |
| TCAATAT | 83  |

|         |     |
|---------|-----|
| TCAATCA | 43  |
| TCAATCC | 105 |
| TCAATCG | 43  |
| TCAATCT | 79  |
| TCAATGA | 69  |
| TCAATGC | 43  |
| TCAATGG | 43  |
| TCAATGT | 54  |
| TCAATTA | 97  |
| TCAATTC | 94  |
| TCAATTG | 69  |
| TCAATTT | 130 |
| TCACAAA | 105 |
| TCACAAC | 40  |
| TCACAAG | 76  |
| TCACAAT | 51  |
| TCACACA | 69  |
| TCACACC | 58  |
| TCACACG | 43  |
| TCACACT | 65  |
| TCACAGA | 32  |
| TCACAGC | 22  |
| TCACAGG | 40  |
| TCACAGT | 18  |
| TCACATA | 83  |
| TCACATC | 72  |
| TCACATG | 137 |
| TCACATT | 54  |
| TCACCAA | 87  |
| TCACCAC | 83  |
| TCACCAG | 69  |
| TCACCAT | 79  |
| TCACCCA | 51  |
| TCACCCC | 61  |
| TCACCCG | 47  |
| TCACCCT | 83  |
| TCACCGA | 65  |
| TCACCGC | 69  |
| TCACCGG | 43  |
| TCACCGT | 94  |
| TCACCTA | 83  |
| TCACCTC | 47  |
| TCACCTG | 36  |
| TCACCTT | 61  |
| TCACGAA | 18  |
| TCACGAC | 14  |
| TCACGAG | 54  |
| TCACGAT | 32  |
| TCACGCA | 51  |
| TCACGCC | 65  |
| TCACGCG | 25  |
| TCACGCT | 47  |

|         |     |
|---------|-----|
| TCACGGA | 22  |
| TCACGGC | 25  |
| TCACGGG | 29  |
| TCACGGT | 43  |
| TCACGTA | 29  |
| TCACGTC | 29  |
| TCACGTG | 36  |
| TCACGTT | 25  |
| TCACTAA | 61  |
| TCACTAC | 40  |
| TCACTAG | 76  |
| TCACTAT | 61  |
| TCACTCA | 90  |
| TCACTCC | 79  |
| TCACTCG | 40  |
| TCACTCT | 90  |
| TCACTGA | 36  |
| TCACTGC | 72  |
| TCACTGG | 51  |
| TCACTGT | 83  |
| TCACTTA | 43  |
| TCACTTC | 72  |
| TCACTTG | 126 |
| TCACTTT | 119 |
| TCAGAAA | 105 |
| TCAGAAC | 36  |
| TCAGAAG | 43  |
| TCAGAAT | 25  |
| TCAGACA | 51  |
| TCAGACC | 29  |
| TCAGACG | 47  |
| TCAGACT | 51  |
| TCAGAGA | 47  |
| TCAGAGA | 47  |
| TCAGAGC | 43  |
| TCAGAGG | 40  |
| TCAGATA | 36  |
| TCAGATC | 54  |
| TCAGATG | 58  |
| TCAGATT | 51  |
| TCAGCAA | 65  |
| TCAGCAC | 43  |
| TCAGCAG | 79  |
| TCAGCAT | 32  |
| TCAGCCA | 69  |
| TCAGCCC | 47  |
| TCAGCCG | 47  |
| TCAGCCT | 29  |
| TCAGCGA | 43  |
| TCAGCGC | 32  |
| TCAGCGG | 29  |
| TCAGCGT | 18  |

|         |     |
|---------|-----|
| TCAGCTA | 61  |
| TCAGCTC | 58  |
| TCAGCTG | 36  |
| TCAGCTT | 65  |
| TCAGGAA | 51  |
| TCAGGAC | 11  |
| TCAGGAG | 51  |
| TCAGGAT | 36  |
| TCAGGCA | 14  |
| TCAGGCC | 47  |
| TCAGGCG | 25  |
| TCAGGCT | 47  |
| TCAGGGA | 40  |
| TCAGGGC | 40  |
| TCAGGGG | 29  |
| TCAGGGT | 25  |
| TCAGGTA | 47  |
| TCAGGTC | 32  |
| TCAGGTG | 14  |
| TCAGGTT | 58  |
| TCAGTAA | 36  |
| TCAGTAC | 43  |
| TCAGTAG | 40  |
| TCAGTAT | 36  |
| TCAGTCA | 54  |
| TCAGTCC | 18  |
| TCAGTCG | 43  |
| TCAGTCT | 83  |
| TCAGTGA | 14  |
| TCAGTGC | 43  |
| TCAGTGG | 47  |
| TCAGTGT | 47  |
| TCAGTTA | 51  |
| TCAGTTC | 29  |
| TCAGTTG | 65  |
| TCAGTTT | 105 |
| TCATAAA | 133 |
| TCATAAC | 72  |
| TCATAAG | 58  |
| TCATAAT | 65  |
| TCATACA | 72  |
| TCATACC | 51  |
| TCATACG | 22  |
| TCATACT | 36  |
| TCATAGA | 65  |
| TCATAGC | 29  |
| TCATAGG | 32  |
| TCATAGT | 61  |
| TCATATA | 180 |
| TCATATC | 105 |
| TCATATG | 112 |
| TCATATT | 115 |

|         |     |
|---------|-----|
| TCATCAA | 119 |
| TCATCAC | 108 |
| TCATCAG | 61  |
| TCATCAT | 105 |
| TCATCCA | 105 |
| TCATCCC | 76  |
| TCATCCG | 22  |
| TCATCCT | 79  |
| TCATCGA | 29  |
| TCATCGC | 36  |
| TCATCGG | 58  |
| TCATCGT | 69  |
| TCATCTA | 69  |
| TCATCTC | 119 |
| TCATCTG | 101 |
| TCATCTT | 126 |
| TCATGAA | 76  |
| TCATGAC | 40  |
| TCATGAG | 58  |
| TCATGAT | 115 |
| TCATGCA | 123 |
| TCATGCC | 83  |
| TCATGCG | 43  |
| TCATGCT | 87  |
| TCATGGA | 65  |
| TCATGGC | 43  |
| TCATGGG | 32  |
| TCATGGT | 83  |
| TCATGTA | 123 |
| TCATGTC | 69  |
| TCATGTG | 115 |
| TCATGTT | 112 |
| TCATTAA | 87  |
| TCATTAC | 32  |
| TCATTAG | 51  |
| TCATTAT | 105 |
| TCATTCA | 69  |
| TCATTCC | 126 |
| TCATTCG | 43  |
| TCATTCT | 90  |
| TCATTGA | 94  |
| TCATTGC | 43  |
| TCATTGG | 29  |
| TCATTGT | 58  |
| TCATTTA | 123 |
| TCATTTT | 105 |
| TCATTTG | 105 |
| TCATTTT | 209 |
| TCCAAAA | 133 |
| TCCAAAC | 94  |
| TCCAAAG | 94  |
| TCCAAAT | 130 |

|         |     |
|---------|-----|
| TCCAACA | 76  |
| TCCAACC | 87  |
| TCCAACG | 76  |
| TCCAACT | 58  |
| TCCAAGA | 79  |
| TCCAAGC | 79  |
| TCCAAGG | 43  |
| TCCAAGT | 76  |
| TCCAATA | 65  |
| TCCAATC | 101 |
| TCCAATG | 36  |
| TCCAATT | 115 |
| TCCACAA | 72  |
| TCCACAA | 72  |
| TCCACAC | 58  |
| TCCACAT | 83  |
| TCCACCA | 112 |
| TCCACCC | 65  |
| TCCACCG | 65  |
| TCCACCT | 123 |
| TCCACGA | 14  |
| TCCACGC | 54  |
| TCCACGG | 65  |
| TCCACGT | 58  |
| TCCACTA | 40  |
| TCCACTC | 79  |
| TCCACTG | 90  |
| TCCACTT | 69  |
| TCCAGAA | 76  |
| TCCAGAC | 40  |
| TCCAGAG | 65  |
| TCCAGAT | 105 |
| TCCAGCA | 115 |
| TCCAGCC | 90  |
| TCCAGCG | 32  |
| TCCAGCT | 47  |
| TCCAGGA | 32  |
| TCCAGGC | 47  |
| TCCAGGG | 36  |
| TCCAGGT | 43  |
| TCCAGTA | 40  |
| TCCAGTC | 40  |
| TCCAGTG | 51  |
| TCCAGTT | 32  |
| TCCATAA | 90  |
| TCCATAC | 25  |
| TCCATAG | 58  |
| TCCATAT | 115 |
| TCCATCA | 83  |
| TCCATCC | 141 |
| TCCATCG | 105 |
| TCCATCT | 87  |

|         |     |
|---------|-----|
| TCCATGA | 54  |
| TCCATGC | 72  |
| TCCATGG | 36  |
| TCCATGT | 115 |
| TCCATTA | 61  |
| TCCATTC | 97  |
| TCCATTG | 65  |
| TCCATTT | 112 |
| TCCAAA  | 105 |
| TCCAAC  | 72  |
| TCCAAG  | 79  |
| TCCAAT  | 65  |
| TCCACA  | 87  |
| TCCACC  | 69  |
| TCCACG  | 36  |
| TCCACT  | 47  |
| TCCAGA  | 40  |
| TCCAGC  | 47  |
| TCCAGG  | 47  |
| TCCAGT  | 7   |
| TCCATA  | 51  |
| TCCATC  | 79  |
| TCCATG  | 54  |
| TCCATT  | 58  |
| TCCCAA  | 83  |
| TCCCAC  | 101 |
| TCCCAG  | 43  |
| TCCCAT  | 79  |
| TCCCCA  | 79  |
| TCCCCC  | 61  |
| TCCCCG  | 40  |
| TCCCCT  | 166 |
| TCCCCGA | 43  |
| TCCCCGA | 43  |
| TCCCCGG | 29  |
| TCCCCGT | 69  |
| TCCCCTA | 51  |
| TCCCCTC | 137 |
| TCCCCTG | 32  |
| TCCCCTT | 79  |
| TCCCGAA | 18  |
| TCCCGAC | 18  |
| TCCCGAG | 43  |
| TCCCGAT | 14  |
| TCCCGCA | 22  |
| TCCCGCC | 47  |
| TCCCGCG | 43  |
| TCCCGCT | 47  |
| TCCCGGA | 14  |
| TCCCGGC | 14  |
| TCCCGGG | 25  |
| TCCCGGT | 25  |

|         |     |
|---------|-----|
| TCCCGTA | 22  |
| TCCCGTC | 47  |
| TCCCGTG | 47  |
| TCCCGTT | 47  |
| TCCCTAA | 47  |
| TCCCTAC | 65  |
| TCCCTAG | 51  |
| TCCCTAT | 101 |
| TCCCTCA | 94  |
| TCCCTCC | 130 |
| TCCCTCG | 51  |
| TCCCTCT | 79  |
| TCCCTGA | 32  |
| TCCCTGC | 76  |
| TCCCTGG | 54  |
| TCCCTGT | 61  |
| TCCCTTA | 54  |
| TCCCTTC | 90  |
| TCCCTTG | 90  |
| TCCCTTT | 137 |
| TCCGAAA | 29  |
| TCCGAAC | 40  |
| TCCGAAG | 51  |
| TCCGAAT | 22  |
| TCCGACA | 29  |
| TCCGACC | 36  |
| TCCGACG | 22  |
| TCCGACT | 40  |
| TCCGAGA | 18  |
| TCCGAGC | 69  |
| TCCGAGG | 25  |
| TCCGAGT | 25  |
| TCCGATA | 22  |
| TCCGATC | 76  |
| TCCGATG | 54  |
| TCCGATT | 40  |
| TCCGCAA | 22  |
| TCCGCAC | 43  |
| TCCGCAG | 22  |
| TCCGCAT | 32  |
| TCCGCCA | 40  |
| TCCGCCC | 61  |
| TCCGCCG | 72  |
| TCCGCCT | 47  |
| TCCGCGA | 58  |
| TCCGCGC | 69  |
| TCCGCGG | 14  |
| TCCGCGT | 51  |
| TCCGCTA | 25  |
| TCCGCTC | 54  |
| TCCGCTG | 43  |
| TCCGCTT | 54  |



|          |     |
|----------|-----|
| TCCGGAA  | 25  |
| TCCGGAC  | 43  |
| TCCGGAG  | 14  |
| TCCGGAT  | 36  |
| TCCGGCA  | 29  |
| TCCGGCC  | 79  |
| TCCGGCG  | 43  |
| TCCGGCT  | 61  |
| TCCGGGA  | 18  |
| TCCGGGC  | 36  |
| TCCGGGG  | 43  |
| TCCGGGT  | 43  |
| TCCGGTA  | 40  |
| TCCGGTC  | 54  |
| TCCGGTG  | 202 |
| TCCGGTT  | 51  |
| TCCGTAA  | 22  |
| TCCGTAC  | 29  |
| TCCGTAG  | 18  |
| TCCGTAT  | 47  |
| TCCGTCA  | 18  |
| TCCGTCC  | 87  |
| TCCGTCCG | 40  |
| TCCGTCT  | 29  |
| TCCGTGA  | 22  |
| TCCGTGC  | 58  |
| TCCGTGG  | 25  |
| TCCGTGT  | 40  |
| TCCGTTA  | 25  |
| TCCGTTA  | 25  |
| TCCGTTC  | 47  |
| TCCGTTG  | 54  |
| TCCTAAA  | 87  |
| TCCTAAC  | 40  |
| TCCTAAG  | 54  |
| TCCTAAT  | 51  |
| TCCTACA  | 51  |
| TCCTACC  | 36  |
| TCCTACG  | 36  |
| TCCTACT  | 58  |
| TCCTAGA  | 47  |
| TCCTAGC  | 58  |
| TCCTAGG  | 47  |
| TCCTAGT  | 14  |
| TCCTATA  | 87  |
| TCCTATC  | 58  |
| TCCTATG  | 51  |
| TCCTATT  | 101 |
| TCCTCAA  | 112 |
| TCCTCAC  | 87  |
| TCCTCAG  | 22  |
| TCCTCAT  | 87  |

|         |     |
|---------|-----|
| TCCTCCA | 130 |
| TCCTCCC | 152 |
| TCCTCCG | 94  |
| TCCTCCT | 202 |
| TCCTCGA | 32  |
| TCCTCGC | 87  |
| TCCTCGG | 58  |
| TCCTCGT | 47  |
| TCCTCTA | 105 |
| TCCTCTC | 180 |
| TCCTCTG | 54  |
| TCCTCTT | 166 |
| TCCTGAA | 87  |
| TCCTGAC | 36  |
| TCCTGAG | 36  |
| TCCTGAT | 40  |
| TCCTGCA | 65  |
| TCCTGCC | 87  |
| TCCTGCG | 54  |
| TCCTGCT | 72  |
| TCCTGGA | 22  |
| TCCTGGC | 32  |
| TCCTGGG | 47  |
| TCCTGGT | 47  |
| TCCTGTA | 43  |
| TCCTGTC | 65  |
| TCCTGTG | 51  |
| TCCTGTT | 79  |
| TCCTTAA | 69  |
| TCCTTAC | 29  |
| TCCTTAG | 69  |
| TCCTTAT | 72  |
| TCCTTCA | 79  |
| TCCTTCC | 112 |
| TCCTTCG | 76  |
| TCCTTCT | 97  |
| TCCTTGA | 61  |
| TCCTTGC | 101 |
| TCCTTGG | 87  |
| TCCTTGT | 108 |
| TCCTTTA | 65  |
| TCCTTTC | 108 |
| TCCTTTG | 115 |
| TCCTTTT | 148 |
| TCGAAAA | 54  |
| TCGAAAC | 32  |
| TCGAAAG | 36  |
| TCGAAAT | 43  |
| TCGAACA | 36  |
| TCGAACC | 40  |
| TCGAACG | 40  |
| TCGAACT | 47  |

|         |    |
|---------|----|
| TCGAAGA | 40 |
| TCGAAGC | 40 |
| TCGAAGG | 32 |
| TCGAAGT | 22 |
| TCGAATA | 36 |
| TCGAATC | 22 |
| TCGAATG | 43 |
| TCGAATT | 43 |
| TCGACAA | 43 |
| TCGACAA | 43 |
| TCGACAC | 32 |
| TCGACAG | 29 |
| TCGACCA | 36 |
| TCGACCC | 25 |
| TCGACCG | 76 |
| TCGACCT | 40 |
| TCGACGA | 79 |
| TCGACGC | 22 |
| TCGACGG | 51 |
| TCGACGT | 32 |
| TCGACTA | 22 |
| TCGACTC | 43 |
| TCGACTG | 47 |
| TCGACTT | 43 |
| TCGAGAA | 54 |
| TCGAGAC | 18 |
| TCGAGAG | 65 |
| TCGAGAT | 47 |
| TCGAGCA | 43 |
| TCGAGCC | 32 |
| TCGAGCG | 61 |
| TCGAGCT | 58 |
| TCGAGGA | 43 |
| TCGAGGC | 43 |
| TCGAGGG | 29 |
| TCGAGGT | 32 |
| TCGAGTA | 29 |
| TCGAGTC | 40 |
| TCGAGTG | 43 |
| TCGAGTT | 58 |
| TCGATAA | 22 |
| TCGATAC | 40 |
| TCGATAG | 22 |
| TCGATAT | 47 |
| TCGATCA | 61 |
| TCGATCC | 87 |
| TCGATCG | 76 |
| TCGATCT | 97 |
| TCGATGA | 40 |
| TCGATGC | 51 |
| TCGATGG | 47 |
| TCGATGT | 36 |

|         |    |
|---------|----|
| TCGATTA | 40 |
| TCGATTC | 51 |
| TCGATTG | 51 |
| TCGATTT | 79 |
| TCGCAAA | 40 |
| TCGCAAC | 18 |
| TCGCAAG | 47 |
| TCGCAAT | 25 |
| TCGCACA | 11 |
| TCGCACC | 25 |
| TCGCACG | 14 |
| TCGCACT | 22 |
| TCGCAGA | 18 |
| TCGCAGC | 40 |
| TCGCAGG | 25 |
| TCGCAGT | 11 |
| TCGCATA | 22 |
| TCGCATC | 51 |
| TCGCATG | 58 |
| TCGCATT | 51 |
| TCGCCAA | 58 |
| TCGCCAC | 65 |
| TCGCCAG | 32 |
| TCGCCAT | 47 |
| TCGCCCA | 36 |
| TCGCCCC | 79 |
| TCGCCCG | 36 |
| TCGCCCT | 43 |
| TCGCCGA | 51 |
| TCGCCGA | 51 |
| TCGCCGC | 83 |
| TCGCCGT | 72 |
| TCGCCTA | 32 |
| TCGCCTC | 72 |
| TCGCCTG | 43 |
| TCGCCTT | 25 |
| TCGCGAA | 18 |
| TCGCGAC | 22 |
| TCGCGAG | 25 |
| TCGCGAT | 22 |
| TCGCGCA | 22 |
| TCGCGCC | 40 |
| TCGCGCG | 58 |
| TCGCGCT | 29 |
| TCGCGGA | 40 |
| TCGCGGC | 54 |
| TCGCGGG | 14 |
| TCGCGGT | 18 |
| TCGCGTA | 4  |
| TCGCGTC | 76 |
| TCGCGTG | 32 |
| TCGCGTT | 18 |

|         |    |
|---------|----|
| TCGCTAA | 36 |
| TCGCTAC | 14 |
| TCGCTAG | 43 |
| TCGCTAT | 22 |
| TCGCTCA | 36 |
| TCGCTCC | 61 |
| TCGCTCG | 54 |
| TCGCTCT | 61 |
| TCGCTGA | 11 |
| TCGCTGC | 36 |
| TCGCTGG | 40 |
| TCGCTGT | 36 |
| TCGCTTA | 14 |
| TCGCTTC | 69 |
| TCGCTTG | 43 |
| TCGCTTT | 43 |
| TCGGAAA | 40 |
| TCGGAAC | 32 |
| TCGGAAG | 51 |
| TCGGAAT | 11 |
| TCGGACA | 29 |
| TCGGACC | 43 |
| TCGGACG | 61 |
| TCGGACT | 32 |
| TCGGAGA | 22 |
| TCGGAGC | 43 |
| TCGGAGG | 36 |
| TCGGAGT | 14 |
| TCGGATA | 32 |
| TCGGATC | 51 |
| TCGGATG | 32 |
| TCGGATT | 43 |
| TCGGCAA | 69 |
| TCGGCAC | 32 |
| TCGGCAG | 25 |
| TCGGCAT | 14 |
| TCGGCCA | 61 |
| TCGGCCC | 40 |
| TCGGCCG | 51 |
| TCGGCCT | 51 |
| TCGGCGA | 29 |
| TCGGCGC | 29 |
| TCGGCGG | 54 |
| TCGGCGT | 40 |
| TCGGCTA | 51 |
| TCGGCTC | 72 |
| TCGGCTG | 40 |
| TCGGCTT | 58 |
| TCGGGAA | 29 |
| TCGGGAC | 25 |
| TCGGGAG | 29 |
| TCGGGAT | 18 |

|         |    |
|---------|----|
| TCGGGCA | 32 |
| TCGGGCC | 58 |
| TCGGGCG | 54 |
| TCGGGCT | 47 |
| TCGGGGA | 29 |
| TCGGGGC | 22 |
| TCGGGGG | 32 |
| TCGGGGT | 61 |
| TCGGGTA | 14 |
| TCGGGTC | 25 |
| TCGGGTG | 29 |
| TCGGGTT | 29 |
| TCGGTAA | 25 |
| TCGGTAC | 36 |
| TCGGTAG | 11 |
| TCGGTAT | 40 |
| TCGGTCA | 43 |
| TCGGTCC | 29 |
| TCGGTCG | 40 |
| TCGGTCT | 54 |
| TCGGTGA | 25 |
| TCGGTGC | 36 |
| TCGGTGG | 47 |
| TCGGTGT | 36 |
| TCGGTTA | 36 |
| TCGGTTC | 51 |
| TCGGTTG | 40 |
| TCGGTTT | 87 |
| TCGTAAA | 11 |
| TCGTAAC | 14 |
| TCGTAAG | 18 |
| TCGTAAT | 22 |
| TCGTACA | 36 |
| TCGTACC | 18 |
| TCGTACG | 29 |
| TCGTACT | 43 |
| TCGTAGA | 51 |
| TCGTAGC | 14 |
| TCGTAGG | 25 |
| TCGTAGT | 61 |
| TCGTATA | 25 |
| TCGTATC | 18 |
| TCGTATG | 29 |
| TCGTATT | 36 |
| TCGTCAA | 43 |
| TCGTCAC | 51 |
| TCGTCAG | 32 |
| TCGTCAT | 18 |
| TCGTCCA | 79 |
| TCGTCCC | 65 |
| TCGTCCG | 97 |
| TCGTCCT | 40 |

|         |     |
|---------|-----|
| TCGTCGA | 61  |
| TCGTCGC | 47  |
| TCGTCGG | 65  |
| TCGTCGT | 123 |
| TCGTCTA | 25  |
| TCGTCTC | 90  |
| TCGTCTG | 36  |
| TCGTCTT | 76  |
| TCGTGAA | 36  |
| TCGTGAC | 51  |
| TCGTGAG | 32  |
| TCGTGAT | 18  |
| TCGTGCA | 40  |
| TCGTGCC | 40  |
| TCGTGCG | 22  |
| TCGTGCT | 51  |
| TCGTGGA | 54  |
| TCGTGGC | 58  |
| TCGTGGG | 36  |
| TCGTGGT | 40  |
| TCGTGTA | 69  |
| TCGTGTC | 69  |
| TCGTGTG | 72  |
| TCGTGTT | 51  |
| TCGTTAA | 29  |
| TCGTTAA | 29  |
| TCGTTAG | 40  |
| TCGTTAT | 47  |
| TCGTTCA | 54  |
| TCGTTCC | 61  |
| TCGTTCG | 72  |
| TCGTTCT | 51  |
| TCGTTGA | 40  |
| TCGTTGC | 47  |
| TCGTTGG | 40  |
| TCGTTGT | 47  |
| TCGTTTA | 69  |
| TCGTTTC | 76  |
| TCGTTTG | 61  |
| TCGTTTT | 79  |
| TCTAAAA | 177 |
| TCTAAAC | 69  |
| TCTAAAG | 69  |
| TCTAAAT | 144 |
| TCTAACA | 43  |
| TCTAACC | 51  |
| TCTAACG | 43  |
| TCTAACT | 72  |
| TCTAAGA | 65  |
| TCTAAGC | 18  |
| TCTAAGG | 65  |
| TCTAAGT | 87  |

|         |     |
|---------|-----|
| TCTAATA | 47  |
| TCTAATC | 61  |
| TCTAATG | 72  |
| TCTAATT | 137 |
| TCTACAA | 65  |
| TCTACAC | 54  |
| TCTACAG | 51  |
| TCTACAT | 101 |
| TCTACCA | 29  |
| TCTACCC | 47  |
| TCTACCG | 32  |
| TCTACCT | 79  |
| TCTACGA | 18  |
| TCTACGC | 25  |
| TCTACGG | 36  |
| TCTACGT | 43  |
| TCTACTA | 83  |
| TCTACTC | 58  |
| TCTACTG | 32  |
| TCTACTT | 108 |
| TCTAGAA | 119 |
| TCTAGAC | 61  |
| TCTAGAG | 130 |
| TCTAGAT | 115 |
| TCTAGCA | 54  |
| TCTAGCA | 54  |
| TCTAGCC | 76  |
| TCTAGCT | 69  |
| TCTAGGA | 51  |
| TCTAGGC | 72  |
| TCTAGGG | 36  |
| TCTAGGT | 69  |
| TCTAGTA | 61  |
| TCTAGTC | 47  |
| TCTAGTG | 58  |
| TCTAGTT | 97  |
| TCTATAA | 144 |
| TCTATAC | 29  |
| TCTATAG | 79  |
| TCTATAT | 166 |
| TCTATCA | 83  |
| TCTATCC | 40  |
| TCTATCG | 25  |
| TCTATCT | 76  |
| TCTATGA | 65  |
| TCTATGC | 43  |
| TCTATGG | 29  |
| TCTATGT | 87  |
| TCTATTA | 76  |
| TCTATTC | 54  |
| TCTATTG | 90  |
| TCTATTT | 195 |



|         |     |
|---------|-----|
| TCTCAA  | 101 |
| TCTCAAC | 69  |
| TCTCAAG | 83  |
| TCTCAAT | 87  |
| TCTCACA | 61  |
| TCTCACC | 65  |
| TCTCACG | 51  |
| TCTCACT | 54  |
| TCTCAGA | 51  |
| TCTCAGC | 32  |
| TCTCAGG | 25  |
| TCTCAGT | 32  |
| TCTCATA | 94  |
| TCTCATC | 148 |
| TCTCATG | 90  |
| TCTCATT | 79  |
| TCTCCAA | 112 |
| TCTCCAC | 123 |
| TCTCCAG | 47  |
| TCTCCAT | 79  |
| TCTCCCA | 83  |
| TCTCCCC | 137 |
| TCTCCCG | 47  |
| TCTCCCT | 152 |
| TCTCCGA | 29  |
| TCTCCGC | 36  |
| TCTCCGG | 36  |
| TCTCCGT | 32  |
| TCTCCTA | 69  |
| TCTCCTC | 234 |
| TCTCCTG | 79  |
| TCTCCTT | 130 |
| TCTCGAA | 61  |
| TCTCGAC | 25  |
| TCTCGAG | 25  |
| TCTCGAT | 79  |
| TCTCGCA | 25  |
| TCTCGCC | 94  |
| TCTCGCG | 22  |
| TCTCGCT | 54  |
| TCTCGGA | 47  |
| TCTCGGC | 51  |
| TCTCGGG | 40  |
| TCTCGGT | 61  |
| TCTCGTA | 47  |
| TCTCGTA | 47  |
| TCTCGTG | 58  |
| TCTCGTT | 58  |
| TCTCTAA | 112 |
| TCTCTAC | 69  |
| TCTCTAG | 144 |
| TCTCTAT | 152 |

|         |     |
|---------|-----|
| TCTCTCA | 141 |
| TCTCTCC | 180 |
| TCTCTCG | 83  |
| TCTCTCT | 527 |
| TCTCTGA | 54  |
| TCTCTGC | 79  |
| TCTCTGG | 47  |
| TCTCTGT | 87  |
| TCTCTTA | 83  |
| TCTCTTC | 191 |
| TCTCTTG | 159 |
| TCTCTTT | 141 |
| TCTGAAA | 69  |
| TCTGAAC | 51  |
| TCTGAAG | 43  |
| TCTGAAT | 51  |
| TCTGACA | 43  |
| TCTGACC | 51  |
| TCTGACG | 43  |
| TCTGACT | 29  |
| TCTGAGA | 58  |
| TCTGAGC | 61  |
| TCTGAGG | 32  |
| TCTGAGT | 18  |
| TCTGATA | 54  |
| TCTGATC | 65  |
| TCTGATG | 69  |
| TCTGATT | 69  |
| TCTGCAA | 58  |
| TCTGCAC | 54  |
| TCTGCAG | 51  |
| TCTGCAT | 87  |
| TCTGCCA | 61  |
| TCTGCCC | 40  |
| TCTGCCG | 40  |
| TCTGCCT | 76  |
| TCTGCGA | 32  |
| TCTGCGC | 54  |
| TCTGCGG | 40  |
| TCTGCGT | 51  |
| TCTGCTA | 51  |
| TCTGCTC | 72  |
| TCTGCTG | 112 |
| TCTGCTT | 36  |
| TCTGGAA | 54  |
| TCTGGAC | 36  |
| TCTGGAG | 54  |
| TCTGGAT | 25  |
| TCTGGCA | 51  |
| TCTGGCC | 51  |
| TCTGGCG | 36  |
| TCTGGCT | 40  |

|          |     |
|----------|-----|
| TCTGGGA  | 29  |
| TCTGGGC  | 29  |
| TCTGGGG  | 51  |
| TCTGGGT  | 22  |
| TCTGGTA  | 47  |
| TCTGGTC  | 32  |
| TCTGGTG  | 58  |
| TCTGGTT  | 47  |
| TCTGTAA  | 43  |
| TCTGTAC  | 40  |
| TCTGTAG  | 72  |
| TCTGTAT  | 51  |
| TCTGTCA  | 40  |
| TCTGTCC  | 90  |
| TCTGTCCG | 47  |
| TCTGTCT  | 47  |
| TCTGTGA  | 51  |
| TCTGTGC  | 58  |
| TCTGTGG  | 29  |
| TCTGTGT  | 76  |
| TCTGTTA  | 54  |
| TCTGTTC  | 94  |
| TCTGTTG  | 87  |
| TCTGTTT  | 123 |
| TCTTAAA  | 94  |
| TCTTAAC  | 29  |
| TCTTAAG  | 54  |
| TCTTAAT  | 90  |
| TCTTACA  | 72  |
| TCTTACC  | 22  |
| TCTTACG  | 32  |
| TCTTACT  | 69  |
| TCTTAGA  | 61  |
| TCTTAGC  | 83  |
| TCTTAGG  | 54  |
| TCTTAGT  | 94  |
| TCTTATA  | 76  |
| TCTTATC  | 76  |
| TCTTATG  | 61  |
| TCTTATT  | 155 |
| TCTTCAA  | 126 |
| TCTTCAC  | 90  |
| TCTTCAG  | 61  |
| TCTTCAT  | 123 |
| TCTTCCA  | 79  |
| TCTTCCC  | 119 |
| TCTTCCG  | 72  |
| TCTTCCT  | 170 |
| TCTTCGA  | 69  |
| TCTTCGC  | 76  |
| TCTTCGG  | 51  |
| TCTTCGT  | 94  |

|         |     |
|---------|-----|
| TCTTCTA | 123 |
| TCTTCTC | 170 |
| TCTTCTG | 58  |
| TCTTCTT | 285 |
| TCTTGAA | 76  |
| TCTTGAC | 43  |
| TCTTGAG | 90  |
| TCTTGAT | 112 |
| TCTTGCA | 112 |
| TCTTGCC | 79  |
| TCTTGCG | 36  |
| TCTTGCT | 112 |
| TCTTGGA | 170 |
| TCTTGGC | 94  |
| TCTTGGG | 51  |
| TCTTGGT | 97  |
| TCTTGTA | 90  |
| TCTTGTC | 79  |
| TCTTGTG | 162 |
| TCTTGTT | 162 |
| TCTTTAA | 123 |
| TCTTTAC | 32  |
| TCTTTAG | 115 |
| TCTTTAT | 123 |
| TCTTTCA | 69  |
| TCTTTCC | 123 |
| TCTTTCG | 40  |
| TCTTTCT | 206 |
| TCTTTGA | 112 |
| TCTTTGC | 105 |
| TCTTTGG | 105 |
| TCTTTGT | 162 |
| TCTTTTA | 119 |
| TCTTTTC | 144 |
| TCTTTTG | 180 |
| TCTTTTT | 245 |
| TGAAAAA | 162 |
| TGAAAAC | 115 |
| TGAAAAG | 123 |
| TGAAAAT | 133 |
| TGAAACA | 97  |
| TGAAACC | 58  |
| TGAAACG | 22  |
| TGAAACT | 69  |
| TGAAAGA | 87  |
| TGAAAGC | 54  |
| TGAAAGG | 65  |
| TGAAAGT | 32  |
| TGAAATA | 112 |
| TGAAATC | 87  |
| TGAAATG | 72  |
| TGAAATT | 141 |

|         |     |
|---------|-----|
| TGAACAA | 76  |
| TGAACAC | 61  |
| TGAACAG | 61  |
| TGAACAT | 58  |
| TGAACCA | 94  |
| TGAACCC | 69  |
| TGAACCG | 61  |
| TGAACCT | 58  |
| TGAACGA | 43  |
| TGAACGC | 18  |
| TGAACGG | 36  |
| TGAACGT | 22  |
| TGAACTA | 90  |
| TGAACTC | 51  |
| TGAACTG | 40  |
| TGAACTT | 90  |
| TGAAGAA | 159 |
| TGAAGAA | 159 |
| TGAAGAG | 87  |
| TGAAGAT | 87  |
| TGAAGCA | 47  |
| TGAAGCC | 40  |
| TGAAGCG | 40  |
| TGAAGCT | 47  |
| TGAAGGA | 54  |
| TGAAGGC | 32  |
| TGAAGGG | 36  |
| TGAAGGT | 58  |
| TGAAGTA | 40  |
| TGAAGTC | 51  |
| TGAAGTG | 87  |
| TGAAGTT | 90  |
| TGAATAA | 115 |
| TGAATAC | 29  |
| TGAATAG | 76  |
| TGAATAT | 105 |
| TGAATCA | 87  |
| TGAATCC | 61  |
| TGAATCG | 40  |
| TGAATCT | 72  |
| TGAATGA | 65  |
| TGAATGC | 76  |
| TGAATGG | 58  |
| TGAATGT | 65  |
| TGAATTA | 108 |
| TGAATTC | 51  |
| TGAATTG | 65  |
| TGAATTT | 119 |
| TGACAAA | 115 |
| TGACAAC | 72  |
| TGACAAG | 65  |
| TGACAAT | 72  |

|         |     |
|---------|-----|
| TGACACA | 87  |
| TGACACC | 40  |
| TGACACG | 51  |
| TGACACT | 29  |
| TGACAGA | 36  |
| TGACAGC | 47  |
| TGACAGG | 14  |
| TGACAGT | 51  |
| TGACATA | 54  |
| TGACATC | 51  |
| TGACATG | 108 |
| TGACATT | 108 |
| TGACCAA | 72  |
| TGACCAC | 58  |
| TGACCAG | 29  |
| TGACCAT | 69  |
| TGACCCA | 29  |
| TGACCCC | 22  |
| TGACCCG | 32  |
| TGACCCT | 47  |
| TGACCGA | 36  |
| TGACCGC | 29  |
| TGACCGG | 22  |
| TGACCGT | 22  |
| TGACCTA | 76  |
| TGACCTC | 43  |
| TGACCTG | 29  |
| TGACCTT | 29  |
| TGACGAA | 18  |
| TGACGAC | 65  |
| TGACGAG | 65  |
| TGACGAT | 29  |
| TGACGCA | 22  |
| TGACGCC | 25  |
| TGACGCG | 14  |
| TGACGCT | 18  |
| TGACGGA | 22  |
| TGACGGC | 36  |
| TGACGGG | 11  |
| TGACGGT | 40  |
| TGACGTA | 29  |
| TGACGTC | 36  |
| TGACGTG | 76  |
| TGACGTT | 32  |
| TGACTAA | 108 |
| TGACTAC | 40  |
| TGACTAG | 32  |
| TGACTAT | 54  |
| TGACTCA | 43  |
| TGACTCC | 36  |
| TGACTCG | 25  |
| TGACTCT | 54  |

|         |     |
|---------|-----|
| TGACTGA | 69  |
| TGACTGC | 51  |
| TGACTGG | 54  |
| TGACTGT | 40  |
| TGACTTA | 69  |
| TGACTTC | 61  |
| TGACTTG | 72  |
| TGACTTT | 97  |
| TGAGAAA | 105 |
| TGAGAAC | 32  |
| TGAGAAG | 65  |
| TGAGAAT | 72  |
| TGAGACA | 40  |
| TGAGACA | 40  |
| TGAGACC | 32  |
| TGAGACG | 32  |
| TGAGAGA | 83  |
| TGAGAGC | 72  |
| TGAGAGG | 72  |
| TGAGAGT | 69  |
| TGAGATA | 61  |
| TGAGATC | 54  |
| TGAGATG | 90  |
| TGAGATT | 69  |
| TGAGCAA | 47  |
| TGAGCAC | 76  |
| TGAGCAG | 72  |
| TGAGCAT | 51  |
| TGAGCCA | 90  |
| TGAGCCC | 90  |
| TGAGCCG | 29  |
| TGAGCCT | 61  |
| TGAGCGA | 29  |
| TGAGCGC | 29  |
| TGAGCGG | 25  |
| TGAGCGT | 29  |
| TGAGCTA | 115 |
| TGAGCTC | 76  |
| TGAGCTG | 58  |
| TGAGCTT | 58  |
| TGAGGAA | 54  |
| TGAGGAC | 43  |
| TGAGGAG | 101 |
| TGAGGAT | 58  |
| TGAGGCA | 51  |
| TGAGGCC | 40  |
| TGAGGCG | 32  |
| TGAGGCT | 29  |
| TGAGGGA | 51  |
| TGAGGGC | 36  |
| TGAGGGG | 47  |
| TGAGGGT | 22  |

|         |     |
|---------|-----|
| TGAGGTA | 29  |
| TGAGGTC | 18  |
| TGAGGTG | 40  |
| TGAGGTT | 72  |
| TGAGTAA | 76  |
| TGAGTAC | 47  |
| TGAGTAG | 43  |
| TGAGTAT | 69  |
| TGAGTCA | 43  |
| TGAGTCC | 22  |
| TGAGTCG | 29  |
| TGAGTCT | 36  |
| TGAGTGA | 58  |
| TGAGTGC | 54  |
| TGAGTGG | 65  |
| TGAGTGT | 40  |
| TGAGTTA | 54  |
| TGAGTTC | 79  |
| TGAGTTG | 65  |
| TGAGTTT | 119 |
| TGATAAA | 108 |
| TGATAAC | 40  |
| TGATAAG | 65  |
| TGATAAT | 76  |
| TGATACA | 54  |
| TGATACC | 32  |
| TGATACG | 25  |
| TGATACT | 76  |
| TGATAGA | 101 |
| TGATAGC | 54  |
| TGATAGG | 29  |
| TGATAGT | 40  |
| TGATATA | 119 |
| TGATATC | 40  |
| TGATATG | 65  |
| TGATATT | 152 |
| TGATCAA | 101 |
| TGATCAC | 58  |
| TGATCAG | 51  |
| TGATCAT | 144 |
| TGATCCA | 79  |
| TGATCCC | 32  |
| TGATCCG | 29  |
| TGATCCT | 54  |
| TGATCGA | 65  |
| TGATCGC | 43  |
| TGATCGG | 54  |
| TGATCGT | 32  |
| TGATCTA | 61  |
| TGATCTC | 94  |
| TGATCTG | 72  |
| TGATCTT | 94  |



|          |     |
|----------|-----|
| TGATGAA  | 105 |
| TGATGAC  | 76  |
| TGATGAG  | 94  |
| TGATGAT  | 202 |
| TGATGCA  | 51  |
| TGATGCC  | 79  |
| TGATGCG  | 36  |
| TGATGCT  | 83  |
| TGATGGA  | 65  |
| TGATGGC  | 54  |
| TGATGGG  | 83  |
| TGATGGT  | 79  |
| TGATGTA  | 69  |
| TGATGTC  | 79  |
| TGATGTG  | 130 |
| TGATGTT  | 101 |
| TGATTAA  | 97  |
| TGATTAC  | 32  |
| TGATTAG  | 72  |
| TGATTAT  | 97  |
| TGATTCA  | 87  |
| TGATTCC  | 32  |
| TGATTCCG | 22  |
| TGATTCT  | 83  |
| TGATTGA  | 105 |
| TGATTGC  | 65  |
| TGATTGG  | 22  |
| TGATTGT  | 72  |
| TGATTTA  | 133 |
| TGATTTTC | 65  |
| TGATTTG  | 148 |
| TGATTTT  | 220 |
| TGCAAAA  | 112 |
| TGCAAAC  | 108 |
| TGCAAAG  | 83  |
| TGCAAAT  | 152 |
| TGCAACA  | 97  |
| TGCAACC  | 61  |
| TGCAACG  | 90  |
| TGCAACT  | 108 |
| TGCAAGA  | 87  |
| TGCAAGC  | 83  |
| TGCAAGG  | 61  |
| TGCAAGT  | 79  |
| TGCAATA  | 58  |
| TGCAATA  | 58  |
| TGCAATC  | 72  |
| TGCAATT  | 47  |
| TGCACAA  | 79  |
| TGCACAC  | 108 |
| TGCACAG  | 36  |
| TGCACAT  | 101 |

|         |     |
|---------|-----|
| TGCACCA | 101 |
| TGCACCC | 87  |
| TGCACCG | 87  |
| TGCACCT | 54  |
| TGCACGA | 36  |
| TGCACGC | 65  |
| TGCACGG | 47  |
| TGCACGT | 51  |
| TGCACTA | 69  |
| TGCACTC | 61  |
| TGCACTG | 79  |
| TGCACTT | 87  |
| TGCAGAA | 61  |
| TGCAGAC | 40  |
| TGCAGAG | 76  |
| TGCAGAT | 47  |
| TGCAGCA | 58  |
| TGCAGCC | 61  |
| TGCAGCG | 51  |
| TGCAGCT | 83  |
| TGCAGGA | 58  |
| TGCAGGC | 51  |
| TGCAGGG | 43  |
| TGCAGGT | 76  |
| TGCAGTA | 40  |
| TGCAGTC | 32  |
| TGCAGTG | 69  |
| TGCAGTT | 69  |
| TGCATAA | 101 |
| TGCATAC | 69  |
| TGCATAG | 79  |
| TGCATAT | 101 |
| TGCATCA | 83  |
| TGCATCC | 51  |
| TGCATCG | 22  |
| TGCATCT | 87  |
| TGCATGA | 141 |
| TGCATGC | 216 |
| TGCATGG | 144 |
| TGCATGT | 119 |
| TGCATTA | 97  |
| TGCATTC | 54  |
| TGCATTG | 105 |
| TGCATTT | 184 |
| TGCCAAA | 72  |
| TGCCAAC | 69  |
| TGCCAAG | 72  |
| TGCCAAT | 40  |
| TGCCACA | 43  |
| TGCCACC | 83  |
| TGCCACG | 32  |
| TGCCACT | 51  |

|         |     |
|---------|-----|
| TGCCAGA | 40  |
| TGCCAGC | 58  |
| TGCCAGG | 36  |
| TGCCAGT | 51  |
| TGCCATA | 32  |
| TGCCATC | 87  |
| TGCCATG | 97  |
| TGCCATT | 54  |
| TGCCCAA | 61  |
| TGCCCAC | 51  |
| TGCCCAG | 29  |
| TGCCCAT | 79  |
| TGCCCCA | 25  |
| TGCCCCA | 25  |
| TGCCCCG | 32  |
| TGCCCCT | 54  |
| TGCCCGA | 29  |
| TGCCCGC | 32  |
| TGCCCGG | 14  |
| TGCCCGT | 36  |
| TGCCCTA | 29  |
| TGCCCTC | 72  |
| TGCCCTG | 72  |
| TGCCCTT | 97  |
| TGCCGAA | 43  |
| TGCCGAC | 29  |
| TGCCGAG | 97  |
| TGCCGAT | 32  |
| TGCCGCA | 40  |
| TGCCGCC | 105 |
| TGCCGCG | 43  |
| TGCCGCT | 32  |
| TGCCGGA | 32  |
| TGCCGGC | 58  |
| TGCCGGG | 43  |
| TGCCGGT | 40  |
| TGCCGTA | 25  |
| TGCCGTC | 58  |
| TGCCGTG | 65  |
| TGCCGTT | 40  |
| TGCCTAA | 36  |
| TGCCTAC | 47  |
| TGCCTAG | 29  |
| TGCCTAT | 61  |
| TGCCTCA | 79  |
| TGCCTCC | 61  |
| TGCCTCG | 58  |
| TGCCTCT | 94  |
| TGCCTGA | 51  |
| TGCCTGC | 79  |
| TGCCTGG | 32  |
| TGCCTGT | 76  |

|         |     |
|---------|-----|
| TGCCTTA | 43  |
| TGCCTTC | 79  |
| TGCCTTG | 83  |
| TGCCTTT | 115 |
| TGCGAAA | 36  |
| TGCGAAC | 43  |
| TGCGAAG | 29  |
| TGCGAAT | 14  |
| TGCGACA | 32  |
| TGCGACC | 29  |
| TGCGACG | 43  |
| TGCGACT | 36  |
| TGCGAGA | 29  |
| TGCGAGC | 58  |
| TGCGAGG | 36  |
| TGCGAGT | 11  |
| TGCGATA | 25  |
| TGCGATC | 22  |
| TGCGATG | 22  |
| TGCGATT | 47  |
| TGCGCAA | 32  |
| TGCGCAC | 43  |
| TGCGCAG | 47  |
| TGCGCAT | 18  |
| TGCGCCA | 69  |
| TGCGCCC | 43  |
| TGCGCCG | 29  |
| TGCGCCT | 51  |
| TGCGCGA | 22  |
| TGCGCGC | 87  |
| TGCGCGG | 43  |
| TGCGCGT | 51  |
| TGCGCTA | 29  |
| TGCGCTC | 32  |
| TGCGCTG | 43  |
| TGCGCTT | 29  |
| TGCGGAA | 22  |
| TGCGGAC | 14  |
| TGCGGAG | 47  |
| TGCGGAT | 32  |
| TGCGGCA | 51  |
| TGCGGCC | 47  |
| TGCGGCG | 32  |
| TGCGGCT | 65  |
| TGCGGGA | 25  |
| TGCGGGC | 36  |
| TGCGGGG | 22  |
| TGCGGGT | 36  |
| TGCGGTA | 18  |
| TGCGGTC | 36  |
| TGCGGTG | 14  |
| TGCGGTT | 43  |

|         |     |
|---------|-----|
| TGCGTAA | 14  |
| TGCGTAC | 25  |
| TGCGTAG | 32  |
| TGCGTAT | 25  |
| TGCGTCA | 22  |
| TGCGTCC | 47  |
| TGCGTCG | 32  |
| TGCGTCT | 40  |
| TGCGTGA | 58  |
| TGCGTGA | 58  |
| TGCGTGC | 83  |
| TGCGTGG | 72  |
| TGCGTTA | 7   |
| TGCGTTC | 32  |
| TGCGTTG | 51  |
| TGCGTTT | 54  |
| TGCTAAA | 105 |
| TGCTAAC | 87  |
| TGCTAAG | 36  |
| TGCTAAT | 72  |
| TGCTACA | 83  |
| TGCTACC | 51  |
| TGCTACG | 40  |
| TGCTACT | 54  |
| TGCTAGA | 76  |
| TGCTAGC | 83  |
| TGCTAGG | 18  |
| TGCTAGT | 61  |
| TGCTATA | 123 |
| TGCTATC | 36  |
| TGCTATG | 58  |
| TGCTATT | 72  |
| TGCTCAA | 112 |
| TGCTCAC | 65  |
| TGCTCAG | 25  |
| TGCTCAT | 119 |
| TGCTCCA | 51  |
| TGCTCCC | 83  |
| TGCTCCG | 43  |
| TGCTCCT | 130 |
| TGCTCGA | 43  |
| TGCTCGC | 83  |
| TGCTCGG | 43  |
| TGCTCGT | 47  |
| TGCTCTA | 79  |
| TGCTCTC | 101 |
| TGCTCTG | 79  |
| TGCTCTT | 119 |
| TGCTGAA | 47  |
| TGCTGAC | 51  |
| TGCTGAG | 69  |
| TGCTGAT | 54  |

|          |     |
|----------|-----|
| TGCTGCA  | 61  |
| TGCTGCC  | 72  |
| TGCTGCG  | 36  |
| TGCTGCT  | 108 |
| TGCTGGA  | 43  |
| TGCTGGC  | 29  |
| TGCTGGG  | 58  |
| TGCTGGT  | 69  |
| TGCTGTA  | 58  |
| TGCTGTC  | 36  |
| TGCTGTG  | 72  |
| TGCTGTT  | 58  |
| TGCTTAA  | 79  |
| TGCTTAC  | 36  |
| TGCTTAG  | 36  |
| TGCTTAT  | 90  |
| TGCTTCA  | 72  |
| TGCTTCC  | 94  |
| TGCTTCG  | 58  |
| TGCTTCT  | 108 |
| TGCTTGA  | 94  |
| TGCTTGC  | 72  |
| TGCTTGG  | 51  |
| TGCTTGT  | 159 |
| TGCTTTA  | 97  |
| TGCTTTC  | 87  |
| TGCTTTG  | 105 |
| TGCTTTT  | 137 |
| TGGA AAA | 112 |
| TGGA AAC | 79  |
| TGGA AAG | 90  |
| TGGA AAT | 72  |
| TGGA ACA | 54  |
| TGGA ACC | 61  |
| TGGA ACG | 22  |
| TGGA ACT | 40  |
| TGGA AGA | 94  |
| TGGA AGC | 54  |
| TGGA AGG | 65  |
| TGGA AGT | 76  |
| TGGA ATA | 54  |
| TGGA ATA | 54  |
| TGGA ATC | 36  |
| TGGA ATG | 61  |
| TGGA CAA | 61  |
| TGGA CAC | 54  |
| TGGA CAG | 61  |
| TGGA CAT | 61  |
| TGGA CCA | 87  |
| TGGA CCC | 36  |
| TGGA CCG | 58  |
| TGGA CCT | 72  |

|         |     |
|---------|-----|
| TGGACGA | 43  |
| TGGACGC | 32  |
| TGGACGG | 36  |
| TGGACGT | 40  |
| TGGACTA | 36  |
| TGGACTC | 83  |
| TGGACTG | 65  |
| TGGACTT | 101 |
| TGGAGAA | 72  |
| TGGAGAC | 90  |
| TGGAGAG | 97  |
| TGGAGAT | 83  |
| TGGAGCA | 69  |
| TGGAGCC | 47  |
| TGGAGCG | 36  |
| TGGAGCT | 108 |
| TGGAGGA | 90  |
| TGGAGGC | 108 |
| TGGAGGG | 76  |
| TGGAGGT | 83  |
| TGGAGTA | 54  |
| TGGAGTC | 43  |
| TGGAGTG | 51  |
| TGGAGTT | 72  |
| TGGATAA | 61  |
| TGGATAC | 43  |
| TGGATAG | 22  |
| TGGATAT | 65  |
| TGGATCA | 65  |
| TGGATCC | 90  |
| TGGATCG | 36  |
| TGGATCT | 97  |
| TGGATGA | 105 |
| TGGATGC | 54  |
| TGGATGG | 90  |
| TGGATGT | 115 |
| TGGATTA | 87  |
| TGGATTC | 47  |
| TGGATTG | 79  |
| TGGATTT | 94  |
| TGGCAAA | 51  |
| TGGCAAC | 54  |
| TGGCAAG | 79  |
| TGGCAAT | 40  |
| TGGCACA | 123 |
| TGGCACC | 65  |
| TGGCACG | 32  |
| TGGCACT | 72  |
| TGGCAGA | 43  |
| TGGCAGC | 40  |
| TGGCAGG | 43  |
| TGGCAGT | 32  |

|         |    |
|---------|----|
| TGGCATA | 94 |
| TGGCATC | 79 |
| TGGCATG | 87 |
| TGGCATT | 90 |
| TGGCCAA | 65 |
| TGGCCAC | 72 |
| TGGCCAG | 87 |
| TGGCCAT | 69 |
| TGGCCCA | 32 |
| TGGCCCA | 32 |
| TGGCCCC | 25 |
| TGGCCCT | 32 |
| TGGCCGA | 22 |
| TGGCCGC | 47 |
| TGGCCGG | 54 |
| TGGCCGT | 58 |
| TGGCCTA | 25 |
| TGGCCTC | 51 |
| TGGCCTG | 58 |
| TGGCCTT | 51 |
| TGGCGAA | 36 |
| TGGCGAC | 29 |
| TGGCGAG | 40 |
| TGGCGAT | 29 |
| TGGCGCA | 83 |
| TGGCGCC | 69 |
| TGGCGCG | 32 |
| TGGCGCT | 54 |
| TGGCGGA | 51 |
| TGGCGGC | 61 |
| TGGCGGG | 47 |
| TGGCGGT | 51 |
| TGGCGTA | 25 |
| TGGCGTC | 36 |
| TGGCGTG | 69 |
| TGGCGTT | 29 |
| TGGCTAA | 51 |
| TGGCTAC | 40 |
| TGGCTAG | 61 |
| TGGCTAT | 51 |
| TGGCTCA | 47 |
| TGGCTCC | 40 |
| TGGCTCG | 47 |
| TGGCTCT | 87 |
| TGGCTGA | 54 |
| TGGCTGC | 54 |
| TGGCTGG | 43 |
| TGGCTGT | 58 |
| TGGCTTA | 22 |
| TGGCTTC | 72 |
| TGGCTTG | 61 |
| TGGCTTT | 61 |



|         |     |
|---------|-----|
| TGGGAAA | 65  |
| TGGGAAC | 36  |
| TGGGAAG | 76  |
| TGGGAAT | 47  |
| TGGGACA | 36  |
| TGGGACC | 22  |
| TGGGACG | 36  |
| TGGGACT | 25  |
| TGGGAGA | 54  |
| TGGGAGC | 47  |
| TGGGAGG | 54  |
| TGGGAGT | 36  |
| TGGGATA | 29  |
| TGGGATC | 29  |
| TGGGATG | 43  |
| TGGGATT | 69  |
| TGGGCAA | 61  |
| TGGGCAC | 18  |
| TGGGCAG | 22  |
| TGGGCAT | 40  |
| TGGGCCA | 101 |
| TGGGCCC | 54  |
| TGGGCCG | 32  |
| TGGGCCT | 29  |
| TGGGCGA | 47  |
| TGGGCGC | 25  |
| TGGGCGG | 43  |
| TGGGCGT | 14  |
| TGGGCTA | 51  |
| TGGGCTC | 40  |
| TGGGCTG | 40  |
| TGGGCTT | 61  |
| TGGGGAA | 29  |
| TGGGGAC | 51  |
| TGGGGAG | 51  |
| TGGGGAT | 36  |
| TGGGGCA | 22  |
| TGGGGCC | 47  |
| TGGGGCG | 47  |
| TGGGGCT | 61  |
| TGGGGGA | 32  |
| TGGGGGC | 51  |
| TGGGGGG | 72  |
| TGGGGGT | 61  |
| TGGGGTA | 36  |
| TGGGGTC | 36  |
| TGGGGTG | 54  |
| TGGGGTT | 61  |
| TGGGTAA | 43  |
| TGGGTAC | 29  |
| TGGGTAG | 25  |
| TGGGTAT | 40  |

|         |     |
|---------|-----|
| TGGGTCA | 7   |
| TGGGTCC | 47  |
| TGGGTCG | 65  |
| TGGGTCT | 22  |
| TGGGTGA | 43  |
| TGGGTGC | 54  |
| TGGGTGG | 47  |
| TGGGTGT | 76  |
| TGGGTTA | 43  |
| TGGTTTC | 61  |
| TGGTTTG | 65  |
| TGGTTT  | 69  |
| TGGTAAA | 69  |
| TGGTAAC | 29  |
| TGGTAAG | 32  |
| TGGTAAT | 61  |
| TGGTACA | 43  |
| TGGTACC | 36  |
| TGGTACG | 29  |
| TGGTACT | 25  |
| TGGTAGA | 58  |
| TGGTAGC | 58  |
| TGGTAGG | 32  |
| TGGTAGT | 36  |
| TGGTATA | 54  |
| TGGTATC | 54  |
| TGGTATG | 72  |
| TGGTATT | 101 |
| TGGTCAA | 36  |
| TGGTCAC | 32  |
| TGGTCAG | 43  |
| TGGTCAT | 76  |
| TGGTCCA | 72  |
| TGGTCCC | 22  |
| TGGTCCG | 65  |
| TGGTCCT | 61  |
| TGGTCGA | 47  |
| TGGTCGC | 51  |
| TGGTCGG | 36  |
| TGGTCGT | 65  |
| TGGTCTA | 54  |
| TGGTCTA | 54  |
| TGGTCTG | 58  |
| TGGTCTT | 47  |
| TGGTGAA | 87  |
| TGGTGAC | 58  |
| TGGTGAG | 65  |
| TGGTGAT | 115 |
| TGGTGCA | 119 |
| TGGTGCC | 58  |
| TGGTGCG | 61  |
| TGGTGCT | 76  |

|          |     |
|----------|-----|
| TGGTGGA  | 54  |
| TGGTGGC  | 112 |
| TGGTGGG  | 58  |
| TGGTGGT  | 115 |
| TGGTGTA  | 65  |
| TGGTGTC  | 79  |
| TGGGTG   | 76  |
| TGGTGTT  | 101 |
| TGGTTAA  | 40  |
| TGGTTAC  | 32  |
| TGGTTAG  | 69  |
| TGGTTAT  | 72  |
| TGGTTCA  | 43  |
| TGGTTCC  | 54  |
| TGGTTCCG | 43  |
| TGGTTCT  | 87  |
| TGGTTGA  | 87  |
| TGGTTGC  | 69  |
| TGGTTGG  | 105 |
| TGGTTGT  | 90  |
| TGGTTTA  | 90  |
| TGGTTTC  | 94  |
| TGGTTTG  | 144 |
| TGGTTTT  | 133 |
| TGTAAAA  | 159 |
| TGTAAAC  | 87  |
| TGTAAAG  | 61  |
| TGTAAAT  | 119 |
| TGTAACA  | 54  |
| TGTAACC  | 47  |
| TGTAACG  | 40  |
| TGTAACT  | 79  |
| TGTAAGA  | 65  |
| TGTAAGC  | 40  |
| TGTAAGG  | 43  |
| TGTAAGT  | 36  |
| TGTAATA  | 105 |
| TGTAATC  | 58  |
| TGTAATG  | 69  |
| TGTAATT  | 130 |
| TGTACAA  | 61  |
| TGTACAC  | 72  |
| TGTACAG  | 36  |
| TGTACAT  | 123 |
| TGTACCA  | 54  |
| TGTACCC  | 36  |
| TGTACCG  | 25  |
| TGTACCT  | 47  |
| TGTACGA  | 32  |
| TGTACGC  | 22  |
| TGTACGG  | 25  |
| TGTACGT  | 79  |

|         |     |
|---------|-----|
| TGTA    | 65  |
| TGTACTC | 58  |
| TGTACTG | 72  |
| TGTACTT | 40  |
| TGTAGAA | 97  |
| TGTAGAA | 97  |
| TGTAGAC | 29  |
| TGTAGAT | 87  |
| TGTAGCA | 65  |
| TGTAGCC | 79  |
| TGTAGCG | 29  |
| TGTAGCT | 97  |
| TGTAGGA | 54  |
| TGTAGGC | 29  |
| TGTAGGG | 69  |
| TGTAGGT | 22  |
| TGTAGTA | 47  |
| TGTAGTC | 61  |
| TGTAGTG | 119 |
| TGTAGTT | 61  |
| TGTATAA | 108 |
| TGTATAC | 76  |
| TGTATAG | 61  |
| TGTATAT | 159 |
| TGTATCA | 65  |
| TGTATCC | 43  |
| TGTATCG | 29  |
| TGTATCT | 76  |
| TGTATGA | 72  |
| TGTATGC | 47  |
| TGTATGG | 72  |
| TGTATGT | 87  |
| TGTATTA | 108 |
| TGTATTC | 76  |
| TGTATTG | 65  |
| TGTATTT | 180 |
| TGTCAAA | 97  |
| TGTCAAC | 51  |
| TGTCAAG | 40  |
| TGTCAAT | 83  |
| TGTCACA | 72  |
| TGTCACC | 79  |
| TGTCACG | 51  |
| TGTCACT | 76  |
| TGTCAGA | 29  |
| TGTCAGC | 69  |
| TGTCAGG | 43  |
| TGTCAGT | 51  |
| TGTCATA | 69  |
| TGTCATC | 65  |
| TGTCATG | 97  |
| TGTCATT | 69  |

|         |     |
|---------|-----|
| TGTCAA  | 72  |
| TGTCCAC | 61  |
| TGTCCAG | 32  |
| TGTCCAT | 83  |
| TGTCCCA | 40  |
| TGTCCCC | 29  |
| TGTCCCG | 22  |
| TGTCCCT | 61  |
| TGTCCGA | 36  |
| TGTCCGC | 40  |
| TGTCCGG | 148 |
| TGTCCGT | 32  |
| TGCCTA  | 36  |
| TGCCTC  | 51  |
| TGCCTG  | 72  |
| TGCCTT  | 69  |
| TGTCGAA | 32  |
| TGTCGAC | 58  |
| TGTCGAG | 51  |
| TGTCGAT | 29  |
| TGTCGCA | 47  |
| TGTCGCC | 25  |
| TGTCGCG | 36  |
| TGTCGCT | 36  |
| TGTCGGA | 18  |
| TGTCGGA | 18  |
| TGTCGGG | 40  |
| TGTCGGT | 29  |
| TGTCGTA | 40  |
| TGTCGTC | 65  |
| TGTCGTG | 69  |
| TGTCGTT | 36  |
| TGTCTAA | 83  |
| TGTCTAC | 22  |
| TGTCTAG | 83  |
| TGTCTAT | 94  |
| TGTCTCA | 65  |
| TGTCTCC | 69  |
| TGTCTCG | 54  |
| TGTCTCT | 133 |
| TGTCTGA | 32  |
| TGTCTGC | 90  |
| TGTCTGG | 51  |
| TGTCTGT | 61  |
| TGTCTTA | 65  |
| TGTCTTC | 90  |
| TGTCTTG | 119 |
| TGTCTTT | 159 |
| TGTGAAA | 87  |
| TGTGAAC | 94  |
| TGTGAAG | 83  |
| TGTGAAT | 97  |

|          |     |
|----------|-----|
| TGTGACA  | 83  |
| TGTGACC  | 25  |
| TGTGACG  | 14  |
| TGTGACT  | 47  |
| TGTGAGA  | 76  |
| TGTGAGC  | 43  |
| TGTGAGG  | 47  |
| TGTGAGT  | 65  |
| TGTGATA  | 87  |
| TGTGATC  | 54  |
| TGTGATG  | 123 |
| TGTGATT  | 101 |
| TGTGCAA  | 87  |
| TGTGCAC  | 79  |
| TGTGCAG  | 65  |
| TGTGCAT  | 119 |
| TGTGCCA  | 97  |
| TGTGCCC  | 40  |
| TGTGCCG  | 11  |
| TGTGCCT  | 72  |
| TGTGCGA  | 32  |
| TGTGCGC  | 40  |
| TGTGCGG  | 54  |
| TGTGCGT  | 69  |
| TGTGCTA  | 94  |
| TGTGCTC  | 79  |
| TGTGCTG  | 47  |
| TGTGCTT  | 90  |
| TGTGGAA  | 58  |
| TGTGGAC  | 65  |
| TGTGGAG  | 69  |
| TGTGGAT  | 83  |
| TGTGGCA  | 76  |
| TGTGGCC  | 72  |
| TGTGGCG  | 47  |
| TGTGGCT  | 54  |
| TGTGGGA  | 32  |
| TGTGGGC  | 29  |
| TGTGGGG  | 61  |
| TGTGGGT  | 47  |
| TGTGGTA  | 79  |
| TGTGGTC  | 51  |
| TGTGGTG  | 94  |
| TGTGGTT  | 83  |
| TGTGTAA  | 61  |
| TGTGTAC  | 79  |
| TGTGTAG  | 76  |
| TGTGTAT  | 108 |
| TGTGTCA  | 76  |
| TGTGTCC  | 51  |
| TGTGTCCG | 61  |
| TGTGTCT  | 105 |

|         |     |
|---------|-----|
| TGTGTGA | 58  |
| TGTGTGC | 90  |
| TGTGTGG | 79  |
| TGTGTGT | 137 |
| TGTGTTA | 65  |
| TGTGTTT | 119 |
| TGTGTTG | 166 |
| TGTGTTT | 159 |
| TGTTAAA | 72  |
| TGTTAAC | 32  |
| TGTTAAG | 69  |
| TGTTAAT | 87  |
| TGTTACA | 76  |
| TGTTACC | 43  |
| TGTTACG | 43  |
| TGTTACT | 61  |
| TGTTAGA | 69  |
| TGTTAGC | 72  |
| TGTTAGG | 29  |
| TGTTAGT | 87  |
| TGTTATA | 76  |
| TGTTATC | 76  |
| TGTTATG | 79  |
| TGTTATT | 130 |
| TGTTCAA | 101 |
| TGTTCAC | 83  |
| TGTTCAG | 36  |
| TGTTCAT | 119 |
| TGTTCCA | 72  |
| TGTTCCC | 72  |
| TGTTCCG | 14  |
| TGTTCCT | 72  |
| TGTTCGA | 40  |
| TGTTCGC | 29  |
| TGTTCGG | 47  |
| TGTTCGT | 79  |
| TGTTCTA | 108 |
| TGTTCTC | 87  |
| TGTTCTG | 101 |
| TGTTCTT | 141 |
| TGTTGAA | 94  |
| TGTTGAC | 72  |
| TGTTGAG | 101 |
| TGTTGAT | 166 |
| TGTTGCA | 108 |
| TGTTGCC | 83  |
| TGTTGCG | 40  |
| TGTTGCT | 155 |
| TGTTGGA | 83  |
| TGTTGGC | 76  |
| TGTTGGG | 58  |
| TGTTGGT | 69  |

|         |     |
|---------|-----|
| TGTTGTA | 101 |
| TGTTGTC | 97  |
| TGTTGTG | 130 |
| TGTTGTT | 123 |
| TGTTTAA | 105 |
| TGTTTAC | 58  |
| TGTTTAG | 87  |
| TGTTTAT | 159 |
| TGTTTCA | 108 |
| TGTTTCC | 108 |
| TGTTTCG | 54  |
| TGTTTCT | 137 |
| TGTTTGA | 119 |
| TGTTTGC | 79  |
| TGTTTGG | 162 |
| TGTTTGT | 159 |
| TGTTTTA | 159 |
| TGTTTTC | 101 |
| TGTTTTG | 170 |
| TGTTTTT | 281 |
| TTAAAAA | 274 |
| TTAAAAC | 69  |
| TTAAAAG | 94  |
| TTAAAAT | 220 |
| TTAAACA | 97  |
| TTAAACC | 90  |
| TTAAACG | 29  |
| TTAAACT | 137 |
| TTAAAGA | 126 |
| TTAAAGC | 51  |
| TTAAAGG | 47  |
| TTAAAGT | 97  |
| TTAAATA | 231 |
| TTAAATC | 94  |
| TTAAATG | 126 |
| TTAAATT | 238 |
| TTAACAA | 126 |
| TTAACAC | 47  |
| TTAACAG | 25  |
| TTAACAT | 79  |
| TTAACCA | 29  |
| TTAACCC | 47  |
| TTAACCG | 25  |
| TTAACCT | 36  |
| TTAACGA | 22  |
| TTAACGC | 11  |
| TTAACGG | 22  |
| TTAACGT | 40  |
| TTAACTA | 58  |
| TTAACTC | 76  |
| TTAACTG | 32  |
| TTAACTT | 65  |



|         |     |
|---------|-----|
| TTAAGAA | 87  |
| TTAAGAC | 29  |
| TTAAGAG | 51  |
| TTAAGAT | 76  |
| TTAAGCA | 76  |
| TTAAGCA | 76  |
| TTAAGCC | 25  |
| TTAAGCG | 14  |
| TTAAGGA | 54  |
| TTAAGGC | 51  |
| TTAAGGG | 65  |
| TTAAGGT | 51  |
| TTAAGTA | 61  |
| TTAAGTC | 54  |
| TTAAGTG | 65  |
| TTAAGTT | 87  |
| TTAATAA | 170 |
| TTAATAC | 69  |
| TTAATAG | 79  |
| TTAATAT | 155 |
| TTAATCA | 72  |
| TTAATCC | 58  |
| TTAATCG | 40  |
| TTAATCT | 101 |
| TTAATGA | 87  |
| TTAATGC | 65  |
| TTAATGG | 61  |
| TTAATGT | 101 |
| TTAATTA | 224 |
| TTAATTC | 97  |
| TTAATTG | 87  |
| TTAATTT | 281 |
| TTACAAA | 166 |
| TTACAAC | 54  |
| TTACAAG | 105 |
| TTACAAT | 65  |
| TTACACA | 76  |
| TTACACC | 40  |
| TTACACG | 25  |
| TTACACT | 58  |
| TTACAGA | 43  |
| TTACAGC | 25  |
| TTACAGG | 22  |
| TTACAGT | 29  |
| TTACATA | 101 |
| TTACATC | 61  |
| TTACATG | 51  |
| TTACATT | 61  |
| TTACCAA | 58  |
| TTACCAC | 25  |
| TTACCAG | 29  |
| TTACCAT | 43  |

|         |     |
|---------|-----|
| TTACCCA | 54  |
| TTACCCC | 36  |
| TTACCCG | 14  |
| TTACCCT | 51  |
| TTACCGA | 32  |
| TTACCGC | 18  |
| TTACCGG | 36  |
| TTACCGT | 29  |
| TTACCTA | 51  |
| TTACCTC | 36  |
| TTACCTG | 29  |
| TTACCTT | 43  |
| TTACGAA | 18  |
| TTACGAC | 25  |
| TTACGAG | 11  |
| TTACGAT | 25  |
| TTACGCA | 22  |
| TTACGCC | 22  |
| TTACGCG | 11  |
| TTACGCT | 14  |
| TTACGGA | 22  |
| TTACGGC | 11  |
| TTACGGG | 25  |
| TTACGGT | 25  |
| TTACGTA | 22  |
| TTACGTA | 22  |
| TTACGTC | 14  |
| TTACGTT | 22  |
| TTACTAA | 79  |
| TTACTAC | 51  |
| TTACTAG | 69  |
| TTACTAT | 87  |
| TTACTCA | 54  |
| TTACTCC | 54  |
| TTACTCG | 25  |
| TTACTCT | 101 |
| TTACTGA | 69  |
| TTACTGC | 29  |
| TTACTGG | 32  |
| TTACTGT | 58  |
| TTACTTA | 79  |
| TTACTTC | 36  |
| TTACTTG | 61  |
| TTACTTT | 76  |
| TTAGAAA | 105 |
| TTAGAAC | 36  |
| TTAGAAG | 47  |
| TTAGAAT | 76  |
| TTAGACA | 65  |
| TTAGACA | 65  |
| TTAGACG | 36  |
| TTAGACT | 51  |

|         |     |
|---------|-----|
| TTAGAGA | 72  |
| TTAGAGC | 43  |
| TTAGAGG | 83  |
| TTAGAGT | 61  |
| TTAGATA | 90  |
| TTAGATC | 69  |
| TTAGATG | 58  |
| TTAGATT | 101 |
| TTAGCAA | 83  |
| TTAGCAC | 58  |
| TTAGCAG | 40  |
| TTAGCAT | 61  |
| TTAGCCA | 69  |
| TTAGCCC | 65  |
| TTAGCCG | 14  |
| TTAGCCT | 61  |
| TTAGCGA | 36  |
| TTAGCGC | 29  |
| TTAGCGG | 29  |
| TTAGCGT | 40  |
| TTAGCTA | 90  |
| TTAGCTC | 65  |
| TTAGCTG | 47  |
| TTAGCTT | 101 |
| TTAGGAA | 83  |
| TTAGGAC | 51  |
| TTAGGAG | 36  |
| TTAGGAT | 72  |
| TTAGGCA | 51  |
| TTAGGCC | 43  |
| TTAGGCG | 29  |
| TTAGGCT | 43  |
| TTAGGGA | 61  |
| TTAGGGC | 47  |
| TTAGGGG | 69  |
| TTAGGGT | 54  |
| TTAGGTA | 51  |
| TTAGGTC | 58  |
| TTAGGTG | 69  |
| TTAGGTT | 51  |
| TTAGTAA | 79  |
| TTAGTAC | 61  |
| TTAGTAG | 72  |
| TTAGTAT | 72  |
| TTAGTCA | 72  |
| TTAGTCC | 69  |
| TTAGTCG | 29  |
| TTAGTCT | 87  |
| TTAGTGA | 94  |
| TTAGTGC | 54  |
| TTAGTGG | 61  |
| TTAGTGT | 76  |

|         |     |
|---------|-----|
| TTAGTTA | 69  |
| TTAGTTC | 87  |
| TTAGTTG | 65  |
| TTAGTTT | 105 |
| TTATAAA | 191 |
| TTATAAC | 87  |
| TTATAAG | 72  |
| TTATAAT | 184 |
| TTATACA | 87  |
| TTATACC | 40  |
| TTATACG | 54  |
| TTATACT | 94  |
| TTATAGA | 112 |
| TTATAGC | 105 |
| TTATAGG | 36  |
| TTATAGT | 97  |
| TTATATA | 271 |
| TTATATC | 83  |
| TTATATG | 105 |
| TTATATT | 256 |
| TTATCAA | 101 |
| TTATCAC | 76  |
| TTATCAG | 43  |
| TTATCAT | 112 |
| TTATCCA | 69  |
| TTATCCC | 61  |
| TTATCCG | 47  |
| TTATCCT | 61  |
| TTATCGA | 25  |
| TTATCGC | 22  |
| TTATCGG | 25  |
| TTATCGT | 22  |
| TTATCTA | 97  |
| TTATCTC | 58  |
| TTATCTG | 51  |
| TTATCTT | 173 |
| TTATGAA | 101 |
| TTATGAC | 54  |
| TTATGAG | 43  |
| TTATGAT | 90  |
| TTATGCA | 112 |
| TTATGCC | 32  |
| TTATGCG | 43  |
| TTATGCT | 90  |
| TTATGGA | 83  |
| TTATGGC | 51  |
| TTATGGG | 43  |
| TTATGGT | 79  |
| TTATGTA | 79  |
| TTATGTC | 51  |
| TTATGTG | 94  |
| TTATGTT | 148 |

|         |     |
|---------|-----|
| TTATTAA | 115 |
| TTATTAC | 87  |
| TTATTAG | 97  |
| TTATTAT | 314 |
| TTATTCA | 108 |
| TTATTCC | 58  |
| TTATTCG | 18  |
| TTATTCT | 133 |
| TTATTGA | 97  |
| TTATTGC | 87  |
| TTATTGG | 72  |
| TTATTGT | 166 |
| TTATTTA | 271 |
| TTATTTG | 101 |
| TTATTTT | 198 |
| TTATTTT | 317 |
| TTCAAAA | 152 |
| TTCAAAC | 119 |
| TTCAAAG | 87  |
| TTCAAAT | 170 |
| TTCAACA | 72  |
| TTCAACC | 90  |
| TTCAACG | 25  |
| TTCAACT | 69  |
| TTCAAGA | 115 |
| TTCAAGC | 51  |
| TTCAAGG | 51  |
| TTCAAGT | 83  |
| TTCAATA | 72  |
| TTCAATC | 101 |
| TTCAATG | 61  |
| TTCAATT | 152 |
| TTCACAA | 83  |
| TTCACAC | 43  |
| TTCACAG | 25  |
| TTCACAT | 126 |
| TTCACCA | 72  |
| TTCACCC | 79  |
| TTCACCG | 76  |
| TTCACCT | 58  |
| TTCACGA | 36  |
| TTCACGC | 32  |
| TTCACGG | 29  |
| TTCACGT | 32  |
| TTCACTA | 65  |
| TTCACTC | 65  |
| TTCACTG | 69  |
| TTCACTT | 105 |
| TTCAGAA | 65  |
| TTCAGAC | 43  |
| TTCAGAG | 54  |
| TTCAGAT | 69  |

|         |     |
|---------|-----|
| TTCAGCA | 61  |
| TTCAGCC | 47  |
| TTCAGCG | 25  |
| TTCAGCT | 47  |
| TTCAGGA | 58  |
| TTCAGGC | 43  |
| TTCAGGG | 18  |
| TTCAGGT | 43  |
| TTCAGTA | 58  |
| TTCAGTC | 65  |
| TTCAGTG | 25  |
| TTCAGTT | 94  |
| TTCATAA | 97  |
| TTCATAC | 65  |
| TTCATAG | 72  |
| TTCATAT | 130 |
| TTCATCA | 130 |
| TTCATCC | 83  |
| TTCATCG | 76  |
| TTCATCT | 123 |
| TTCATGA | 83  |
| TTCATGC | 101 |
| TTCATGG | 83  |
| TTCATGT | 123 |
| TTCATTA | 79  |
| TTCATTC | 130 |
| TTCATTG | 69  |
| TTCATTT | 170 |
| TTCCAAA | 108 |
| TTCCAAC | 79  |
| TTCCAAG | 101 |
| TTCCAAT | 94  |
| TTCCACA | 58  |
| TTCCACC | 72  |
| TTCCACG | 58  |
| TTCCACT | 65  |
| TTCCAGA | 69  |
| TTCCAGC | 61  |
| TTCCAGG | 79  |
| TTCCAGT | 43  |
| TTCCATA | 76  |
| TTCCATC | 94  |
| TTCCATG | 69  |
| TTCCATT | 61  |
| TTCCCAA | 90  |
| TTCCCAC | 61  |
| TTCCCAG | 36  |
| TTCCCAT | 61  |
| TTCCCCA | 97  |
| TTCCCCC | 94  |
| TTCCCCG | 54  |
| TTCCCCT | 105 |

|         |     |
|---------|-----|
| TTCCCGA | 18  |
| TTCCCGA | 18  |
| TTCCCGC | 25  |
| TTCCCGG | 29  |
| TTCCCTA | 54  |
| TTCCCTC | 101 |
| TTCCCTG | 61  |
| TTCCCTT | 130 |
| TTCCGAA | 32  |
| TTCCGAC | 22  |
| TTCCGAG | 22  |
| TTCCGAT | 58  |
| TTCCGCA | 22  |
| TTCCGCC | 36  |
| TTCCGCG | 18  |
| TTCCGCT | 36  |
| TTCCGGA | 14  |
| TTCCGGC | 40  |
| TTCCGGG | 43  |
| TTCCGGT | 29  |
| TTCCGTA | 11  |
| TTCCGTC | 32  |
| TTCCGTG | 32  |
| TTCCGTT | 40  |
| TTCCTAA | 69  |
| TTCCTAC | 36  |
| TTCCTAG | 51  |
| TTCCTAT | 83  |
| TTCCTCA | 79  |
| TTCCTCC | 137 |
| TTCCTCG | 54  |
| TTCCTCT | 105 |
| TTCCTGA | 61  |
| TTCCTGC | 83  |
| TTCCTGG | 43  |
| TTCCTGT | 83  |
| TTCCTTA | 90  |
| TTCCTTC | 119 |
| TTCCTTG | 137 |
| TTCCTTT | 184 |
| TTCGAAA | 51  |
| TTCGAAC | 51  |
| TTCGAAG | 29  |
| TTCGAAT | 40  |
| TTCGACA | 36  |
| TTCGACC | 25  |
| TTCGACG | 47  |
| TTCGACT | 32  |
| TTCGAGA | 65  |
| TTCGAGC | 36  |
| TTCGAGG | 25  |
| TTCGAGT | 51  |

|          |     |
|----------|-----|
| TTCGATA  | 29  |
| TTCGATC  | 90  |
| TTCGATG  | 40  |
| TTCGATT  | 61  |
| TTCGCAA  | 32  |
| TTCGCAC  | 11  |
| TTCGCAG  | 22  |
| TTCGCAT  | 54  |
| TTCGCCA  | 32  |
| TTCGCCC  | 51  |
| TTCGCCG  | 54  |
| TTCGCCT  | 29  |
| TTCGCGA  | 11  |
| TTCGCGC  | 22  |
| TTCGCGG  | 25  |
| TTCGCGT  | 14  |
| TTCGCTA  | 14  |
| TTCGCTC  | 43  |
| TTCGCTG  | 25  |
| TTCGCTT  | 65  |
| TTCGGAA  | 29  |
| TTCGGAC  | 22  |
| TTCGGAG  | 18  |
| TTCGGAT  | 65  |
| TTCGGCA  | 4   |
| TTCGGCC  | 32  |
| TTCGGCG  | 47  |
| TTCGGCT  | 51  |
| TTCGGGA  | 25  |
| TTCGGGC  | 32  |
| TTCGGGG  | 29  |
| TTCGGGT  | 32  |
| TTCGGTA  | 29  |
| TTCGGTC  | 40  |
| TTCGGTG  | 40  |
| TTCGGTT  | 97  |
| TTCGTAA  | 29  |
| TTCGTAC  | 18  |
| TTCGTAG  | 32  |
| TTCGTAT  | 32  |
| TTCGTCA  | 54  |
| TTCGTCC  | 90  |
| TTCGTCCG | 87  |
| TTCGTCT  | 54  |
| TTCGTGA  | 51  |
| TTCGTGA  | 51  |
| TTCGTGG  | 51  |
| TTCGTGT  | 69  |
| TTCGTTA  | 61  |
| TTCGTTC  | 112 |
| TTCGTTG  | 36  |
| TTCGTTT  | 119 |



|         |     |
|---------|-----|
| TTCTAAA | 195 |
| TTCTAAC | 65  |
| TTCTAAG | 79  |
| TTCTAAT | 101 |
| TTCTACA | 87  |
| TTCTACC | 65  |
| TTCTACG | 25  |
| TTCTACT | 112 |
| TTCTAGA | 141 |
| TTCTAGC | 40  |
| TTCTAGG | 36  |
| TTCTAGT | 72  |
| TTCTATA | 105 |
| TTCTATC | 61  |
| TTCTATG | 65  |
| TTCTATT | 101 |
| TTCTCAA | 126 |
| TTCTCAC | 43  |
| TTCTCAG | 32  |
| TTCTCAT | 94  |
| TTCTCCA | 72  |
| TTCTCCC | 126 |
| TTCTCCG | 18  |
| TTCTCCT | 177 |
| TTCTCGA | 40  |
| TTCTCGC | 43  |
| TTCTCGG | 54  |
| TTCTCGT | 61  |
| TTCTCTA | 162 |
| TTCTCTC | 155 |
| TTCTCTG | 97  |
| TTCTCTT | 159 |
| TTCTGAA | 58  |
| TTCTGAC | 29  |
| TTCTGAG | 65  |
| TTCTGAT | 58  |
| TTCTGCA | 83  |
| TTCTGCC | 51  |
| TTCTGCG | 29  |
| TTCTGCT | 54  |
| TTCTGGA | 76  |
| TTCTGGC | 47  |
| TTCTGGG | 32  |
| TTCTGGT | 61  |
| TTCTGTA | 65  |
| TTCTGTC | 69  |
| TTCTGTG | 65  |
| TTCTGTT | 101 |
| TTCTTAA | 97  |
| TTCTTAA | 97  |
| TTCTTAC | 69  |
| TTCTTAT | 159 |

|         |     |
|---------|-----|
| TTCTTCA | 130 |
| TTCTTCC | 148 |
| TTCTTCG | 101 |
| TTCTTCT | 263 |
| TTCTTGA | 105 |
| TTCTTGC | 112 |
| TTCTTGG | 94  |
| TTCTTGT | 144 |
| TTCTTTA | 130 |
| TTCTTTC | 137 |
| TTCTTTG | 141 |
| TTCTTTT | 289 |
| TTGAAAA | 195 |
| TTGAAAC | 65  |
| TTGAAAG | 72  |
| TTGAAAT | 166 |
| TTGAACA | 43  |
| TTGAACC | 87  |
| TTGAACG | 14  |
| TTGAACT | 83  |
| TTGAAGA | 69  |
| TTGAAGC | 25  |
| TTGAAGG | 47  |
| TTGAAGT | 94  |
| TTGAATA | 130 |
| TTGAATA | 130 |
| TTGAATG | 79  |
| TTGAATT | 97  |
| TTGACAA | 94  |
| TTGACAC | 47  |
| TTGACAG | 51  |
| TTGACAT | 123 |
| TTGACCA | 54  |
| TTGACCC | 47  |
| TTGACCG | 14  |
| TTGACCT | 40  |
| TTGACGA | 43  |
| TTGACGC | 18  |
| TTGACGG | 18  |
| TTGACGT | 36  |
| TTGACTA | 61  |
| TTGACTC | 58  |
| TTGACTG | 58  |
| TTGACTT | 101 |
| TTGAGAA | 79  |
| TTGAGAC | 58  |
| TTGAGAG | 83  |
| TTGAGAT | 76  |
| TTGAGCA | 58  |
| TTGAGCC | 76  |
| TTGAGCG | 32  |
| TTGAGCT | 90  |

|         |     |
|---------|-----|
| TTGAGGA | 126 |
| TTGAGGC | 51  |
| TTGAGGG | 51  |
| TTGAGGT | 69  |
| TTGAGTA | 83  |
| TTGAGTC | 69  |
| TTGAGTG | 54  |
| TTGAGTT | 101 |
| TTGATAA | 87  |
| TTGATAC | 43  |
| TTGATAG | 72  |
| TTGATAT | 108 |
| TTGATCA | 126 |
| TTGATCC | 69  |
| TTGATCG | 97  |
| TTGATCT | 130 |
| TTGATGA | 119 |
| TTGATGC | 94  |
| TTGATGG | 79  |
| TTGATGT | 90  |
| TTGATTA | 105 |
| TTGATTC | 76  |
| TTGATTG | 83  |
| TTGATTT | 209 |
| TTGCAAA | 159 |
| TTGCAAC | 119 |
| TTGCAAG | 90  |
| TTGCAAT | 69  |
| TTGCACA | 72  |
| TTGCACC | 69  |
| TTGCACG | 47  |
| TTGCACT | 61  |
| TTGCAGA | 72  |
| TTGCAGC | 61  |
| TTGCAGG | 69  |
| TTGCAGT | 65  |
| TTGCATA | 87  |
| TTGCATC | 69  |
| TTGCATG | 137 |
| TTGCATT | 170 |
| TTGCCAA | 65  |
| TTGCCAC | 69  |
| TTGCCAG | 36  |
| TTGCCAT | 94  |
| TTGCCCA | 58  |
| TTGCCCC | 51  |
| TTGCCCG | 29  |
| TTGCCCT | 58  |
| TTGCCGA | 97  |
| TTGCCGC | 61  |
| TTGCCGG | 29  |
| TTGCCGT | 51  |

|         |     |
|---------|-----|
| TTGCCTA | 25  |
| TTGCCTC | 79  |
| TTGCCTG | 43  |
| TTGCCTT | 97  |
| TTGCGAA | 29  |
| TTGCGAC | 43  |
| TTGCGAG | 32  |
| TTGCGAT | 22  |
| TTGCGCA | 32  |
| TTGCGCC | 47  |
| TTGCGCG | 51  |
| TTGCGCT | 29  |
| TTGCGGA | 32  |
| TTGCGGC | 25  |
| TTGCGGG | 29  |
| TTGCGGT | 29  |
| TTGCGTA | 18  |
| TTGCGTC | 36  |
| TTGCGTG | 47  |
| TTGCGTT | 43  |
| TTGCTAA | 115 |
| TTGCTAC | 61  |
| TTGCTAG | 83  |
| TTGCTAT | 76  |
| TTGCTCA | 97  |
| TTGCTCC | 97  |
| TTGCTCG | 79  |
| TTGCTCT | 133 |
| TTGCTGA | 54  |
| TTGCTGC | 40  |
| TTGCTGG | 43  |
| TTGCTGT | 58  |
| TTGCTTA | 65  |
| TTGCTTC | 130 |
| TTGCTTG | 112 |
| TTGCTTT | 166 |
| TTGAAA  | 126 |
| TTGGAAC | 54  |
| TTGGAAG | 90  |
| TTGGAAT | 115 |
| TTGACA  | 79  |
| TTGACC  | 72  |
| TTGACG  | 43  |
| TTGACT  | 119 |
| TTGAGA  | 90  |
| TTGAGC  | 76  |
| TTGAGG  | 108 |
| TTGAGT  | 90  |
| TTGATA  | 90  |
| TTGATC  | 97  |
| TTGATG  | 119 |
| TTGATT  | 112 |

|         |     |
|---------|-----|
| TTGGCAA | 94  |
| TTGGCAC | 76  |
| TTGGCAG | 58  |
| TTGGCAT | 133 |
| TTGGCCA | 97  |
| TTGGCCC | 29  |
| TTGGCCG | 54  |
| TTGGCCT | 40  |
| TTGGCGA | 29  |
| TTGGCGC | 87  |
| TTGGCGG | 47  |
| TTGGCGT | 36  |
| TTGGCTA | 58  |
| TTGGCTC | 76  |
| TTGGCTG | 58  |
| TTGGCTT | 87  |
| TTGGGAA | 51  |
| TTGGGAC | 22  |
| TTGGGAG | 72  |
| TTGGGAT | 51  |
| TTGGGCA | 36  |
| TTGGGCC | 47  |
| TTGGGCG | 29  |
| TTGGGCT | 65  |
| TTGGGGA | 54  |
| TTGGGGC | 40  |
| TTGGGGG | 61  |
| TTGGGGT | 43  |
| TTGGGTA | 47  |
| TTGGGTC | 25  |
| TTGGGTG | 58  |
| TTGGGTT | 83  |
| TTGGTAA | 79  |
| TTGGTAC | 36  |
| TTGGTAG | 61  |
| TTGGTAT | 69  |
| TTGGTCA | 43  |
| TTGGTCC | 54  |
| TTGGTCG | 51  |
| TTGGTCT | 90  |
| TTGGTGA | 148 |
| TTGGTGA | 148 |
| TTGGTGC | 58  |
| TTGGTGT | 123 |
| TTGGTTA | 87  |
| TTGGTTC | 79  |
| TTGGTTG | 108 |
| TTGGTTT | 173 |
| TTGTAAG | 72  |
| TTGTAAC | 58  |
| TTGTAAG | 72  |
| TTGTAAT | 130 |

|          |     |
|----------|-----|
| TTGTACA  | 72  |
| TTGTACC  | 61  |
| TTGTACG  | 22  |
| TTGTA CT | 61  |
| TTGTAGA  | 79  |
| TTGTAGC  | 76  |
| TTGTAGG  | 43  |
| TTGTAGT  | 79  |
| TTGTATA  | 105 |
| TTGTATC  | 87  |
| TTGTATG  | 54  |
| TTGTATT  | 166 |
| TTGTCAA  | 108 |
| TTGTCAC  | 112 |
| TTGTCAG  | 69  |
| TTGTCAT  | 94  |
| TTGTCCA  | 76  |
| TTGTCCC  | 47  |
| TTGTCCG  | 25  |
| TTGTCCT  | 72  |
| TTGTCGA  | 54  |
| TTGTCGC  | 43  |
| TTGTCGG  | 7   |
| TTGTCGT  | 22  |
| TTGTCTA  | 101 |
| TTGTCTC  | 97  |
| TTGTCTG  | 87  |
| TTGTCTT  | 177 |
| TTGTGAA  | 115 |
| TTGTGAC  | 47  |
| TTGTGAG  | 76  |
| TTGTGAT  | 123 |
| TTGTGCA  | 105 |
| TTGTGCC  | 69  |
| TTGTGCG  | 14  |
| TTGTGCT  | 123 |
| TTGTGGA  | 97  |
| TTGTGGC  | 97  |
| TTGTGGG  | 65  |
| TTGTGGT  | 72  |
| TTGTGTA  | 83  |
| TTGTGTC  | 76  |
| TTGTGTG  | 126 |
| TTGTGTT  | 238 |
| TTGTTAA  | 87  |
| TTGTTAA  | 87  |
| TTGTTAC  | 69  |
| TTGTTAG  | 79  |
| TTGTTCA  | 112 |
| TTGTTCC  | 69  |
| TTGTTCG  | 83  |
| TTGTTCT  | 133 |

|         |     |
|---------|-----|
| TTGTTGA | 184 |
| TTGTTGC | 137 |
| TTGTTGG | 105 |
| TTGTTGT | 108 |
| TTGTTTA | 198 |
| TTGTTTC | 148 |
| TTGTTTG | 206 |
| TTGTTTT | 289 |
| TTTAAAA | 271 |
| TTTAAAC | 97  |
| TTTAAAG | 112 |
| TTTAAAT | 310 |
| TTTAACA | 87  |
| TTTAACC | 51  |
| TTTAACG | 18  |
| TTTAACT | 101 |
| TTTAAGA | 101 |
| TTTAAGC | 54  |
| TTTAAGG | 79  |
| TTTAAGT | 115 |
| TTTAATA | 202 |
| TTTAATC | 101 |
| TTTAATG | 115 |
| TTTAATT | 281 |
| TTTACAA | 101 |
| TTTACAC | 61  |
| TTTACAG | 25  |
| TTTACAT | 90  |
| TTTACCA | 69  |
| TTTACCC | 54  |
| TTTACCG | 51  |
| TTTACCT | 54  |
| TTTACGA | 22  |
| TTTACGC | 32  |
| TTTACGG | 25  |
| TTTACGT | 32  |
| TTTACTA | 101 |
| TTTACTC | 69  |
| TTTACTG | 87  |
| TTTACTT | 101 |
| TTTAGAA | 123 |
| TTTAGAC | 47  |
| TTTAGAG | 87  |
| TTTAGAT | 105 |
| TTTAGCA | 94  |
| TTTAGCC | 61  |
| TTTAGCG | 58  |
| TTTAGCT | 97  |
| TTTAGGA | 112 |
| TTTAGGC | 65  |
| TTTAGGG | 72  |
| TTTAGGT | 83  |

|         |     |
|---------|-----|
| TTTAGTA | 108 |
| TTTAGTC | 105 |
| TTTAGTG | 115 |
| TTTAGTT | 152 |
| TTTATAA | 206 |
| TTTATAC | 115 |
| TTTATAG | 137 |
| TTTATAT | 253 |
| TTTATCA | 144 |
| TTTATCC | 97  |
| TTTATCG | 25  |
| TTTATCT | 137 |
| TTTATGA | 108 |
| TTTATGC | 105 |
| TTTATGG | 94  |
| TTTATGT | 148 |
| TTTATTA | 224 |
| TTTATTC | 123 |
| TTTATTG | 144 |
| TTTATTT | 361 |
| TTTCAAA | 184 |
| TTTCAAC | 90  |
| TTTCAAG | 97  |
| TTTCAAT | 126 |
| TTTCACA | 87  |
| TTTCACC | 65  |
| TTTCACG | 32  |
| TTTCACT | 105 |
| TTTCAGA | 54  |
| TTTCAGC | 47  |
| TTTCAGG | 54  |
| TTTCAGT | 83  |
| TTTCATA | 119 |
| TTTCATC | 65  |
| TTTCATG | 133 |
| TTTCATT | 155 |
| TTTCCAA | 155 |
| TTTCCAC | 97  |
| TTTCCAG | 69  |
| TTTCCAT | 79  |
| TTTCCCA | 79  |
| TTTCCCC | 123 |
| TTTCCCG | 54  |
| TTTCCCT | 112 |
| TTTCCGA | 47  |
| TTTCCGC | 29  |
| TTTCCGG | 11  |
| TTTCCGT | 36  |
| TTTCCTA | 61  |
| TTTCCTC | 94  |
| TTTCCTG | 101 |
| TTTCCTT | 177 |



|         |     |
|---------|-----|
| TTTCGAA | 36  |
| TTTCGAC | 25  |
| TTTCGAG | 43  |
| TTTCGAT | 61  |
| TTTCGCA | 47  |
| TTTCGCC | 36  |
| TTTCGCG | 14  |
| TTTCGCT | 54  |
| TTTCGGA | 40  |
| TTTCGGC | 36  |
| TTTCGGG | 25  |
| TTTCGGT | 79  |
| TTTCGTA | 25  |
| TTTCGTA | 25  |
| TTTCGTC | 87  |
| TTTCGTG | 58  |
| TTTCTAA | 195 |
| TTTCTAC | 108 |
| TTTCTAG | 112 |
| TTTCTAT | 94  |
| TTTCTCA | 97  |
| TTTCTCC | 130 |
| TTTCTCG | 94  |
| TTTCTCT | 224 |
| TTTCTGA | 94  |
| TTTCTGC | 69  |
| TTTCTGG | 83  |
| TTTCTGT | 123 |
| TTTCTTA | 144 |
| TTTCTTC | 173 |
| TTTCTTG | 137 |
| TTTCTTT | 314 |
| TTTGAAA | 206 |
| TTTGAAC | 101 |
| TTTGAAG | 97  |
| TTTGAAT | 137 |
| TTTGACA | 105 |
| TTTGACA | 105 |
| TTTGACC | 61  |
| TTTGACT | 119 |
| TTTGAGA | 108 |
| TTTGAGC | 87  |
| TTTGAGG | 94  |
| TTTGAGT | 112 |
| TTTGATA | 141 |
| TTTGATC | 173 |
| TTTGATG | 170 |
| TTTGATT | 152 |
| TTTGCAA | 137 |
| TTTGCAC | 69  |
| TTTGCAG | 101 |
| TTTGCAT | 155 |

|          |     |
|----------|-----|
| TTTGCCA  | 69  |
| TTTGCCC  | 51  |
| TTTGCCG  | 101 |
| TTTGCCT  | 90  |
| TTTGCGA  | 40  |
| TTTGCGC  | 22  |
| TTTGCGG  | 18  |
| TTTGCGT  | 47  |
| TTTGCTA  | 115 |
| TTTGCTC  | 144 |
| TTTGCTG  | 43  |
| TTTGCTT  | 180 |
| TTTGGAA  | 133 |
| TTTGGAC  | 105 |
| TTTGGAG  | 101 |
| TTTGGAT  | 152 |
| TTTGGCA  | 170 |
| TTTGGCC  | 61  |
| TTTGGCG  | 40  |
| TTTGGCT  | 90  |
| TTTGGGA  | 58  |
| TTTGGGC  | 54  |
| TTTGGGG  | 61  |
| TTTGGGT  | 90  |
| TTTGGTA  | 90  |
| TTTGGTC  | 108 |
| TTTGGTG  | 170 |
| TTTGGTT  | 177 |
| TTTGTA   | 173 |
| TTTGTAC  | 47  |
| TTTGTAG  | 69  |
| TTTGTAT  | 159 |
| TTTGTCA  | 137 |
| TTTGTCC  | 83  |
| TTTGTCCG | 25  |
| TTTGTCT  | 188 |
| TTTGTGA  | 141 |
| TTTGTGC  | 97  |
| TTTGTGG  | 97  |
| TTTGTGT  | 191 |
| TTTGTTA  | 115 |
| TTTG TTC | 133 |
| TTTGTTG  | 191 |
| TTTGTTT  | 372 |
| TTTTAAA  | 253 |
| TTTTAAC  | 133 |
| TTTTAAG  | 115 |
| TTTTAAT  | 249 |
| TTTTACA  | 72  |
| TTTTACC  | 97  |
| TTTTACG  | 54  |
| TTTTACT  | 144 |

|         |     |
|---------|-----|
| TTTTAGA | 112 |
| TTTTAGC | 90  |
| TTTTAGG | 87  |
| TTTTAGT | 191 |
| TTTTATA | 238 |
| TTTTATC | 112 |
| TTTTATG | 155 |
| TTTTATT | 368 |
| TTTTCAA | 144 |
| TTTTCAC | 119 |
| TTTTCAG | 90  |
| TTTTCAT | 180 |
| TTTTCCA | 119 |
| TTTTCCC | 144 |
| TTTTCCG | 29  |
| TTTTCCT | 162 |
| TTTTCGA | 25  |
| TTTTCGC | 61  |
| TTTTCGG | 65  |
| TTTTCGT | 112 |
| TTTTCTA | 184 |
| TTTTCTC | 173 |
| TTTTCTG | 112 |
| TTTTCTT | 296 |
| TTTTGAA | 177 |
| TTTTGAC | 79  |
| TTTTGAG | 115 |
| TTTTGAT | 209 |
| TTTTGCA | 184 |
| TTTTGCC | 83  |
| TTTTGCG | 29  |
| TTTTGCT | 144 |
| TTTTGGA | 155 |
| TTTTGGC | 94  |
| TTTTGGG | 87  |
| TTTTGGT | 195 |
| TTTTGTA | 166 |
| TTTTGTC | 130 |
| TTTTGTG | 188 |
| TTTTGTT | 278 |
| TTTTTAA | 310 |
| TTTTTAC | 133 |
| TTTTTAG | 184 |
| TTTTTAT | 346 |
| TTTTTCA | 191 |
| TTTTTCC | 130 |
| TTTTTCG | 76  |
| TTTTTCT | 263 |
| TTTTTGA | 195 |
| TTTTTGC | 123 |
| TTTTTGG | 206 |
| TTTTTGT | 253 |

|         |     |
|---------|-----|
| TTTTTTA | 408 |
| TTTTTTC | 249 |
| TTTTTTG | 310 |
| TTTTTTT | 743 |
