# Supplementary material
Source: PubMed Central journal article supplement (PMC153722)
Supplement: plntcell_15_5_1143__4.pdf [file plntcell_15_5_1143__4.pdf]

|            | Total Promoters | VISTA CNS |
|------------|-----------------|-----------|
| mean       | 60.87           | 86.78     |
| stdev      | 41.67           | 63.94     |
| median     | 51              | 72.14     |
| top 75%    | 76              | 104.61    |
| bottom 25% | 36              | 50.50     |
| skew       | 4.03            | 1.88      |

### Log Likelihood Test for Goodness-of-Fit (G-test)

| Frequency Class | Observed | Expected | Adj Expected | f/f <sup>Λ</sup> | ln(f/f <sup>Λ</sup> ) | f*(ln(f/f <sup>Λ</sup> )) |
|-----------------|----------|----------|--------------|------------------|-----------------------|---------------------------|
| 0-10            | 7        | 109      | 21.33679326  | 0.32807179       | -1.11452282           | -7.80165972               |
| 10-14           | 11       | 466      | 91.21968494  | 0.12058801       | -2.11537544           | -23.2691299               |
| 15-19           | 30       | 383      | 74.972402    | 0.40014724       | -0.91592269           | -27.4776807               |
| 20-24           | 39       | 570      | 111.5777262  | 0.34953213       | -1.0511598            | -40.9952321               |
| 25-29           | 60       | 1442     | 282.2720723  | 0.21256088       | -1.54852684           | -92.9116103               |
| 30-34           | 103      | 860      | 168.3453413  | 0.61183754       | -0.49128848           | -50.6027139               |
| 35-39           | 113      | 891      | 174.4136036  | 0.64788524       | -0.43404169           | -49.0467112               |
| 40-44           | 234      | 1841     | 360.3764806  | 0.64932095       | -0.43182815           | -101.047787               |
| 45-49           | 135      | 840      | 164.4303334  | 0.8210164        | -0.1972122            | -26.6236466               |
| 50-54           | 303      | 1712     | 335.1246794  | 0.90414111       | -0.10076983           | -30.5332599               |
| 55-59           | 125      | 711      | 139.1785322  | 0.89812702       | -0.10744378           | -13.430472                |
| 60-64           | 147      | 675      | 132.1315179  | 1.1125279        | 0.10663481            | 15.6753174                |
| 65-69           | 234      | 1143     | 223.7427036  | 1.04584416       | 0.04482437            | 10.4889022                |
| 70-74           | 117      | 503      | 98.46244963  | 1.18827025       | 0.17249868            | 20.1823457                |
| 75-79           | 209      | 840      | 164.4303334  | 1.27105502       | 0.23984728            | 50.1280808                |
| 80-84           | 87       | 357      | 69.88289168  | 1.2449399        | 0.21908725            | 19.0605911                |
| 85-89           | 108      | 350      | 68.51263891  | 1.57635148       | 0.45511299            | 49.1522028                |
| 90-94           | 157      | 519      | 101.594456   | 1.54535992       | 0.43525684            | 68.3353237                |
| 95-99           | 74       | 220      | 43.06508731  | 1.71832927       | 0.54135246            | 40.0600823                |
| 100-104         | 74       | 217      | 42.47783612  | 1.74208497       | 0.55508266            | 41.0761166                |
| 105-109         | 114      | 311      | 60.87837343  | 1.87258617       | 0.62732045            | 71.5145316                |
| 110-114         | 51       | 135      | 26.42630358  | 1.92989534       | 0.65746577            | 33.5307543                |
| 115-119         | 89       | 225      | 44.0438393   | 2.02071394       | 0.70345088            | 62.6071287                |
| 120-124         | 41       | 97       | 18.9877885   | 2.15928253       | 0.769776              | 31.5608162                |
| 125-150         | 212      | 167      | 32.69031628  | 6.48510091       | 1.86950738            | 396.335564                |
| 151-200         | 169      | 302      | 59.11661986  | 2.85875614       | 1.05038661            | 177.515338                |
| 201-250         | 72       | 99       | 19.37928929  | 3.71530653       | 1.31246119            | 94.4972054                |
| 251-300         | 46       | 49       | 9.591769447  | 4.79577832       | 1.56773602            | 72.1158567                |
| >300            | 46       | 46       | 9.004518256  | 5.10854648       | 1.63091492            | 75.0220862                |

sum g      865.118341  
G            1730.23668
