# Supplementary material
Source: PubMed Central journal article supplement (PMC153722)
Supplement: plntcell_15_5_1143__5.pdf [file plntcell_15_5_1143__5.pdf]

| Accession1 | ID1 | Species1 | Accession2 | Species2 | ID2  | Gene                                    | Coding Identity | BLASTN score | E value | CNS blocks | CNS % | Total Length | Function                |                          |
|------------|-----|----------|------------|----------|------|-----------------------------------------|-----------------|--------------|---------|------------|-------|--------------|-------------------------|--------------------------|
| S69616     | 778 | HV       | AF434703   | TA       | 607  | A1                                      |                 | 88.5         |         |            | 7.0   | 50.2         | structural gene/enzymes |                          |
| U70541     | 827 | OS       | S69616     | HV       | 778  | A1                                      |                 | 82.8         |         |            | 0.0   | 0.0          | structural gene/enzymes |                          |
| U70541     | 827 | OS       | AF010283   | SB       | 531  | A1                                      |                 | 84.4         |         |            | 0.0   | 0.0          | structural gene/enzymes |                          |
| U70541     | 827 | OS       | AF434703   | TA       | 607  | A1                                      |                 | 77.0         |         |            | 0.0   | 0.0          | structural gene/enzymes |                          |
| AF010283   | 531 | SB       | S69616     | HV       | 778  | A1                                      |                 | 86.9         |         |            | 0.0   | 0.0          | structural gene/enzymes |                          |
| AF010283   | 531 | SB       | AF434703   | TA       | 607  | A1                                      |                 | 81.1         |         |            | 0.0   | 0.0          | structural gene/enzymes |                          |
| X05068     | 376 | ZM       | S69616     | HV       | 778  | A1                                      |                 | 82.5         |         |            | 1.0   | 1.9          | structural gene/enzymes |                          |
| X05068     | 376 | ZM       | AF434703   | HV       | 607  | A1                                      |                 | 76.8         |         |            | 0.0   | 0.0          | structural gene/enzymes |                          |
| X05068     | 376 | ZM       | U70541     | OS       | 827  | A1                                      |                 | 81.9         | 159     | 4E-84      | 15.1  | 15.7         | 3053                    | structural genes/enzymes |
| X05068     | 376 | ZM       | AF010283   | SB       | 531  | A1                                      |                 | 85.2         |         |            | 2.0   | 7.1          | structural gene/enzymes |                          |
| AF055898   | 35  | ZM       | AB007404   | OS       | 805  | Alanine aminotransferase                |                 | 93.6         | 101     | 9E-48      | 17.5  | 22.4         | 4523                    | nitrogen metabolism      |
| AF172282   | 808 | OS       | AF253472   | HV       | 708  | alcohol dehydrogenase1 (Adh1)           |                 | 97.6         |         |            | 3.0   | 7.7          | structural gene/enzymes |                          |
| AF172282   | 808 | OS       | X04049     | SB       | 470  | alcohol dehydrogenase1 (Adh1)           |                 | 97.6         |         |            | 5.0   | 9.7          | structural gene/enzymes |                          |
| X04049     | 470 | SB       | AF253472   | HV       | 708  | alcohol dehydrogenase1 (Adh1)           |                 | 97.9         |         |            | 3.0   | 6.4          | structural gene/enzymes |                          |
| X04049     | 470 | ZM       | AF253472   | HV       | 708  | alcohol dehydrogenase1 (Adh1)           |                 | 97.9         |         |            | 3.0   | 7.5          | structural gene/enzymes |                          |
| X04049     | 470 | ZM       | AF172282   | OS       | 808  | alcohol dehydrogenase1 (Adh1)           |                 | 97.6         | 184     | 7E-99      | 16.3  | 22.4         | 4774                    | structural genes/enzymes |
| X04049     | 470 | ZM       | X04049     | SB       | 470  | alcohol dehydrogenase1 (Adh1)           |                 | 100.0        |         |            | 8.0   | 45.5         | structural gene/enzymes |                          |
| X12733     | 868 | HV       |            | TA       | #N/A | Alcohol dehydrogenase2 (Adh2)           |                 | 96.7         |         |            | 8.0   | 78.5         | structural gene/enzymes |                          |
| AF172282   | 808 | OS       | X12733     | HV       | 868  | Alcohol dehydrogenase2 (Adh2)           |                 | 90.8         |         |            | 0.0   | 0.0          | structural gene/enzymes |                          |
| X02915     | 469 | ZM       | X12733     | HV       | 868  | Alcohol dehydrogenase2 (Adh2)           |                 | 79.7         |         |            | 0.0   | 0.0          | structural gene/enzymes |                          |
| X02915     | 469 | ZM       | AF172282   | OS       | 808  | Alcohol dehydrogenase2 (Adh2)           |                 | 83.1         | 210     | 0          | 23.4  | 33.2         | 2007                    | structural genes/enzymes |
| AF215823   | 53  | ZM       | AC084766   | OS       | 810  | aldehyde dehydrogenase Rf2              |                 | 84.3         | 210     | 2E-50      | 1.1   | 1.1          | 15744                   | structural genes/enzymes |
| AF348418   | 497 | ZM       | AF462029   | OS       | 811  | aldehyde dehydrogenase rf2B             |                 | 81.9         | 230     | 2E-56      | 3.4   | 3.2          | 2649                    | structural genes/enzymes |
| X55314     | 870 | ZM       | AP003199   | OS       | 812  | Anthocyaninless2 (A2)                   |                 | 72.8         | 211     | 0          | 9.7   | 10.4         | 1650                    | structural genes/enzymes |
| AJ301645   | 865 | HV       |            | TA       | #N/A | Beta-amylase (Amy2)                     |                 | 98.0         |         |            | 1.0   | 38.3         | starch metabolism       |                          |
| L10345     | 836 | OS       | AJ301645   | HV       | 865  | Beta-amylase (Amy2)                     |                 | 85.2         |         |            | 1.0   | 3.1          | starch metabolism       |                          |
| AF068119   | 38  | ZM       | AJ301645   | HV       | 865  | Beta-amylase (Amy2)                     |                 | 76.3         |         |            | 1.0   | 2.1          | starch metabolism       |                          |
| AF068119   | 38  | ZM       | L10345     | OS       | 836  | Beta-amylase (Amy2)                     |                 | 89.3         | 195     | 0          | 10.0  | 14.9         | 3695                    | starch metabolism        |
| AF334959   | 67  | ZM       | M31616     | OS       | 837  | Brittle2 (Bt2)                          |                 | 88.7         | 174     | 3E-91      | 10.0  | 11.5         | 1105                    | starch metabolism        |
| U14599     | 348 | ZM       | AC092749   | OS       | 813  | Bronze-2 glutathione-S-transferase      |                 | 74.3         | 416     | 1E-113     | 13.6  | 14.3         | 809                     | structural genes/enzymes |
| L27484     | 310 | ZM       | AP003073   | OS       | 850  | Calcium-dependent protein kinase (CDPK) |                 | 76.8         | 202     | 0          | 10.8  | 11.6         | 2490                    | regulatory               |
| AY061804   | 489 | ZM       | AP004161   | OS       | #N/A | calpain-like protein (dek1)             |                 | 477          | 0       | 0          | 7.3   | 7.7          | 3388                    | regulatory               |
| L05934     | 307 | ZM       | D29966     | OS       | 816  | Catalase (Cat3)                         |                 | 90.9         | 319     | 0          | 7.2   | 8.4          | 4292                    | structural genes/enzymes |
| X60135     | 380 | ZM       | D64013     | OS       | 814  | Catalase1 (Cat1)                        |                 | 97.4         | 434     | 0          | 16.6  | 23.0         | 4158                    | structural genes/enzymes |
| Z54358     | 389 | ZM       | AF162665   | OS       | 797  | catalase2 (Cat2)                        |                 | 93.5         | 291     | 1E-74      | 11.7  | 14.6         | 2135                    | structural genes/enzymes |
| AF043347   | 32  | ZM       | AF155121   | OS       | 838  | Cell wall invertase (incw4)             |                 | 82.8         | 241     | 0          | 7.9   | 8.0          | 3282                    | starch metabolism        |
| X58339     | 867 | HV       |            | TA       | #N/A | chalcone synthase                       |                 | 78.8         |         |            | 4.0   | 59.6         | structural gene/enzymes |                          |
| AP003380   | 818 | OS       | X58339     | HV       | 867  | chalcone synthase                       |                 | 95.2         |         |            | 1.0   | 1.3          | structural gene/enzymes |                          |
| X60204     | 478 | ZM       | X58339     | HV       | 867  | chalcone synthase                       |                 | 90.8         |         |            | 0.0   | 0.0          | structural gene/enzymes |                          |
| X60205     | 381 | ZM       | AC087723   | OS       | 817  | Chalcone synthase (C2)                  |                 | 64.9         | 69      | 7E-29      | 28.1  | 33.8         | 962                     | structural genes/enzymes |
| X60204     | 478 | ZM       | AP003380   | OS       | 818  | chalcone synthase, white pollen locus   |                 | 74.3         | 198     | 6E-47      | 14.1  | 16.6         | 2553                    | structural genes/enzymes |
| X12735     | 869 | HV       | M10144     | TA       | #N/A | chlorophyll a/b binding protein (cab1)  |                 | 89.9         |         |            | 0.0   | 0.0          | photosynthesis          |                          |
| AF162665   | 797 | OS       | X12735     | HV       | 869  | chlorophyll a/b binding protein (cab1)  |                 | 88.8         |         |            | 0.0   | 0.0          | photosynthesis          |                          |
| AF162665   | 797 | OS       | M10144     | TA       | #N/A | chlorophyll a/b binding protein (cab1)  |                 | 89.0         |         |            | 0.0   | 0.0          | photosynthesis          |                          |
| X14794     | 472 | ZM       | X12735     | HV       | 869  | chlorophyll a/b binding protein (cab1)  |                 | 90.6         |         |            | 1.0   | 11.6         | photosynthesis          |                          |
| X14794     | 472 | ZM       | M10144     | HV       | #N/A | chlorophyll a/b binding protein (cab1)  |                 | 89.8         |         |            | 0.0   | 0.0          | photosynthesis          |                          |
| X14794     | 472 | ZM       | AF162665   | OS       | 797  | chlorophyll a/b binding protein (cab1)  |                 | 85.5         | 117     | 1E-22      | 14.1  | 16.6         | 2553                    | photosynthesis           |
| X68678     | 393 | ZM       | L29469     | OS       | 783  | Cyclophilin.                            |                 | 91.3         | 213     | 0          | 4.2   | 4.6          | 3571                    | housekeeping             |
| AF007786   | 20  | ZM       | U38199     | OS       | 819  | cystathionine gamma-synthase            |                 | 90.1         | 557     | 1E-155     | 16.0  | 17.9         | 5450                    | structural genes/enzymes |
| D63342     | 302 | ZM       | M29259     | OS       | 820  | Cysteine proteinase inhibitor           |                 | 78.6         | 61      | 3E-24      | 11.6  | 12.5         | 1809                    | structural genes/enzymes |
| AF063403   | 36  | ZM       | AC092388   | OS       | 830  | cytosine-5 DNA methyltransferase ZMET1  |                 | 73.8         | 86      | 1E-13      | 26.6  | 20.8         | 3388                    | structural genes/enzymes |
| AX085557   | 204 | ZM       | X91806     | OS       | 800  | Dull1-like starch-synthase              |                 | 95.3         | 280     | 5E-72      | 19.7  | 25.3         | 609                     | starch metabolism        |
| AF225411   | 54  | ZM       | AP003106   | OS       | 821  | Exoglucanase precursor (exg1)           |                 | 78.9         | 38      | 2E-10      | 9.0   | 9.9          | 2333                    | structural genes/enzymes |
| X83076     | 404 | ZM       | AF370029   | OS       | #N/A | Ferredoxin I                            |                 | 82.7         | 77      | 6E-35      | 24.8  | 30.6         | 2539                    | photosynthesis           |

|          |     |    |               |    |      |                                                  |       |      |            |      |      |      |                          |
|----------|-----|----|---------------|----|------|--------------------------------------------------|-------|------|------------|------|------|------|--------------------------|
| AB001386 | 15  | ZM | D30794        | OS | 799  | Ferredoxin VI                                    | 80.6  | 66   | 3E-27      | 12.6 | 15.3 | 1511 | photosynthesis           |
| Z22760   | 420 | ZM | X91806        | OS | 800  | Ferredoxin-NADP reductase                        | 94.9  | 256  | 1E-64      | 8.8  | 9.6  | 1245 | photosynthesis           |
| AF101045 | 842 | OS | AF010283      | SB | 531  | Gene X putative transcription factor (X)         | 76.0  |      |            | 0.0  | 0.0  |      | regulatory               |
| AF434193 | 486 | ZM | AF010283      | SB | 531  | Gene X putative transcription factor (X)         | 86.8  |      |            | 1.0  | 33.7 |      | regulatory               |
| D63956   | 304 | ZM | D63955        | OS | 851  | Gmlip15 (bZIP factor)                            | 75.8  | 33   | 0.0000002  | 6.9  | 8.5  | 2617 | transcription factor     |
| AF298118 | 64  | ZM | AP002855      | OS | 852  | Golden2                                          | 56.7  | 94   | 1E-43      | 12.4 | 15.8 | 3787 | transcription factor     |
| U09989   | 345 | ZM | D31843        | OS | 784  | H(+)-transporting ATPase (Mha1)                  | 90.1  | 116  | 2E-56      | 1.5  | 1.8  | 6454 | housekeeping             |
| X03714   | 362 | ZM | AF432915      | OS | 822  | heat shock protein 70                            | 80.9  | 373  | 1E-99      | 31.4 | 32.9 | 541  | structural genes/enzymes |
| S59780   | 340 | ZM | Z11920        | OS | 823  | Heat shock protein HSP82                         | 92.7  | 399  | 0          | 5.3  | 5.8  | 1322 | structural genes/enzymes |
| AB026295 | 785 | OS | X00937        | TA | 595  | Histone H3                                       | 100.0 |      |            | 0.0  | 0.0  |      | housekeeping             |
| M13379   | 319 | ZM | X00937        | HV | 595  | Histone H3                                       | 100.0 |      |            | 0.0  | 0.0  |      | housekeeping             |
| M13379   | 319 | ZM | AB026295      | OS | 785  | Histone H3 (H3C4)                                | 100.0 | 275  | 0          | 10.5 | 10.8 | 854  | housekeeping             |
| M13370   | 316 | ZM | AC073166      | OS | 786  | Histone H4 (H4C14)                               | 100.0 | 225  | 0          | 19.4 | 19.9 | 824  | housekeeping             |
| X63134   | 382 | ZM | X61280        | OS | 824  | Hydroxy-rice glycoprotein (HRGP)                 | 54.0  | 51   | 2E-18      | 15.2 | 21.8 | 657  | structural genes/enzymes |
| X61280   | 824 | OS | X56010        | SB | 540  | Hydroxy-rich glycoprotein (HGRP)                 | 60.8  |      |            | 1.0  | 2.2  |      | structural gene/enzymes  |
| AJ131535 | 424 | ZM | X56010        | SB | 540  | Hydroxy-rich glycoprotein (HGRP)                 | 87.5  |      |            | 6.0  | 10.2 |      | structural genes/enzymes |
| AF048900 | 153 | ZM | AP002861      | OS | 853  | Indeterminate spikelet 1 (ids1)                  |       | 32   | 0.0000004  | 10.5 | 10.7 | 665  | transcription factor     |
| Z11754   | 419 | ZM | D16685        | OS | 787  | Lactate dehydrogenase.                           | 58.7  | 230  | 0          | 11.4 | 11.5 | 1936 | housekeeping             |
| AF334960 | 68  | ZM | M31616        | OS | 837  | Leaf ADP-glucose pyrophosphorylase small subunit | 82.7  | 184  | 3E-97      | 12.3 | 15.3 | 4979 | starch metabolism        |
| AF451895 | 488 | ZM | U70541        | OS | 827  | Liguleless1 (lg1)                                | 84.9  | 236  | 0          | 12.4 | 18.5 | 5944 | transcription factor     |
| AJ224847 | 428 | ZM | AP002836      | OS | 863  | Me gene expressed I immature embryo              | 79.6  | 46   | 6E-15      | 16.0 | 17.9 | 5450 | unknown                  |
| S57628   | 494 | ZM | U46159        | OS | 826  | metallothionein-like gene                        | 77.6  | 66   | 0.0000001  | 19.0 | 19.8 | 1630 | structural genes/enzymes |
| AJ238786 | 430 | ZM | AP003047      | OS | 788  | Mus2 for DNA mismatch repair                     | 71.5  | 32   | 0.000003   | 4.8  | 6.4  | 8068 | housekeeping             |
| AF153448 | 48  | ZM | X15820        | OS | #N/A | Nitrate reductase1                               | 90.1  | 846  | 0          | 2.3  | 2.3  | 5218 | nitrogen metabolism      |
| U43930   | 828 | ZM | U43930        | OS | 828  | Oleosin (ole16)                                  | 87.2  | 232  | 0          | 8.0  | 11.2 | 1000 | structural genes/enzymes |
| X59546   | 379 | ZM | U26660        | OS | #N/A | Pdc mRNA for pyruvate decarboxylase              | 93.3  | 409  | 0          | 9.0  | 11.6 | 2211 | housekeeping             |
| AP003052 | 801 | OS | X63756        | SB | 537  | Phosphoenolpyruvate carboxylase                  | 86.2  |      |            | 0.0  | 0.0  |      | photosynthesis           |
| E17154   | 305 | ZM | X63756        | SB | 537  | Phosphoenolpyruvate carboxylase                  | 93.0  |      |            | 3.0  | 28.4 |      | photosynthesis           |
| X15239   | 370 | ZM | AP003052      | OS | 801  | Phosphoenolpyruvate carboxylase (PEPC1)          | 87.2  | 274  | 0          | 7.3  | 7.4  | 3168 | photosynthesis           |
| Z33611   | 422 | ZM | AP003411      | OS | 791  | Phosphoglycerate mutase                          | 94.4  | 98   | 8E-47      | 13.1 | 14.5 | 992  | housekeeping             |
| X66422   | 390 | ZM | AP003140      | OS | 829  | Polygalacturonase (PG)                           | 44.2  | 32   | 0.0000009  | 7.8  | 8.2  | 2828 | structural genes/enzymes |
| S94464   | 465 | ZM | AP003725      | OS | 792  | polyubiquitin (Ubiquitin 1)                      | 72.2  | 503  | 0          | 6.2  | 8.3  | 3251 | housekeeping             |
| S94466   | 466 | ZM | AF184279      | OS | 793  | polyubiquitin2                                   | 85.7  | 1439 | 0          | 14.1 | 15.4 | 1838 | housekeeping             |
| X79065   | 871 | ZM | AF294427      | OS | 789  | proliferating cell nuclear antigen (PCNA)        | 97.7  | 229  | 0          | 25.4 | 29.9 | 355  | housekeeping             |
| Y11649   | 417 | ZM | AB036786      | OS | 858  | Protein kinase alpha subunit (CK2)               | 96.4  | 96   | 1E-44      | 7.8  | 8.9  | 6419 | regulatory               |
| AF063403 | 36  | ZM | AC092388      | OS | 830  | putative cytosine-5 DNA methyltransferase ZMET1  | 73.8  | 86   | 1E-13      | 14.5 | 17.7 | 3388 | regulatory               |
| AF370004 | 496 | ZM | AC121364      | OS | #N/A | pyruvate decarboxylase2                          |       | 105  | 7E-50      | 3.6  | 6.5  | 3345 | housekeeping             |
| AF370006 | 495 | ZM | AC122144      | OS | 831  | pyruvate decarboxylase3                          | 94.3  | 262  | 6E-67      | 13.6 | 15.4 | 5960 | housekeeping             |
| X15994   | 374 | ZM | AC092750      | OS | 832  | RAB-17                                           |       | 114  | 5E-56      | 13.2 | 22.7 | 1137 | structural genes/enzymes |
| X59138   | 378 | ZM | AC099401      | OS | 833  | Rab28                                            | 73.1  | 99   | 2E-48      | 24.7 | 24.3 | 1012 | structural genes/enzymes |
| X67733   | 392 | ZM | AF229199      | OS | 859  | Receptor-like protein kinase (PK1)               |       | 35   | 0.00000002 | 13.3 | 13.9 | 2034 | regulatory               |
| AF101045 | 842 | OS | M81603        | SB | 330  | Shrunken2 (Sh2)                                  | 100.0 |      |            | 10.0 | 17.0 |      | starch metabolism        |
| M81603   | 330 | ZM | AF101045      | OS | 842  | Shrunken2 (Sh2)                                  | 84.9  | 103  | 7E-49      | 5.7  | 6.7  | 5949 | starch metabolism        |
| M81603   | 330 | ZM | M81603        | SB | 330  | Shrunken2 (Sh2)                                  | 93.4  |      |            | 2.0  | 63.0 |      | starch metabolism        |
| D10838   | 843 | OS | AJ237897      | TA | 630  | Starch branching enzyme (Sbe1)                   | 80.2  |      |            | 2.0  | 2.8  |      | starch metabolism        |
| AF072724 | 439 | ZM | AJ237897      | HV | 630  | Starch branching enzyme (Sbe1)                   | 82.2  |      |            | 2.0  | 2.6  |      | starch metabolism        |
| AF072724 | 439 | ZM | D10838        | OS | 843  | Starch branching enzyme I (Sbe1)                 | 82.3  | 503  | 0          | 12.1 | 30.0 | 5363 | starch metabolism        |
| AF228486 | 55  | ZM | AB023498      | OS | 844  | Starch branching enzyme2a (Sbe2a)                |       | 44   | 7E-14      | 7.4  | 5.2  | 4202 | starch metabolism        |
| AF072725 | 440 | ZM | From Monsanto | OS | 845  | Starch branching enzyme1b (Sbe2b/Ae)             | 85.2  | 98   | 6E-47      | 7.1  | 13.7 | 6863 | starch metabolism        |
| AF234163 | 864 | HV | AF091802      | TA | 633  | Starch Synthase                                  | 99.1  |      |            | 4.0  | 17.7 |      | starch metabolism        |
| D38221   | 846 | OS | AF234163      | HV | 864  | Starch Synthase                                  | 80.3  |      |            | 1.0  | 20.9 |      | starch metabolism        |
| D38221   | 846 | OS | AF091802      | TA | 633  | Starch Synthase                                  | 89.9  |      |            | 0.0  | 0.0  |      | starch metabolism        |
| AF036891 | 25  | ZM | AF234163      | HV | 864  | Starch Synthase                                  | 80.6  |      |            | 0.0  | 0.0  |      | starch metabolism        |
| AF036891 | 25  | ZM | AF091802      | HV | 633  | Starch Synthase                                  | 81.7  |      |            | 0.0  | 0.0  |      | starch metabolism        |
| AF036891 | 25  | ZM | D38221        | OS | 846  | Starch synthaseI (Ss1)                           | 86.8  | 811  | 0          | 16.0 | 22.9 | 1123 | starch metabolism        |
| X02382   | 361 | ZM | X64770        | OS | 847  | Sucrose synthase (Sh1)                           | 96.3  | 138  | 9E-70      | 18.3 | 24.6 | 5562 | starch metabolism        |

|          |     |    |          |    |      |                                        |      |      |       |      |      |      |                          |
|----------|-----|----|----------|----|------|----------------------------------------|------|------|-------|------|------|------|--------------------------|
| L29418   | 311 | ZM | AC084380 | OS | 848  | Sucrose synthase (Sus1)                | 97.4 | 175  | 9E-92 | 14.9 | 20.8 | 7305 | starch metabolism        |
| AF030882 | 23  | ZM | AB015615 | OS | 849  | Sugary1 (Su1)                          | 87.5 | 97   | 1E-46 | 1.1  | 1.5  | 9183 | starch metabolism        |
| U34726   | 353 | ZM | L19435   | OS | 834  | Superoxide dismutase 4 (sod4)          | 92.7 | 81   | 4E-36 | 11.6 | 15.2 | 2671 | structural genes/enzymes |
| AF149016 | 47  | ZM | AP003278 | OS | 835  | tapetum-specific endoxylanase          | 93.9 | 918  | 0     | 16.9 | 33.3 | 2722 | structural genes/enzymes |
| AY043215 | 866 | OS | AF466204 | SB | #N/A | Teosinte branched 1 (tb1)              | 61.7 |      |       | 2.0  | 36.7 |      | regulatory               |
| AF377732 | 78  | ZM | AF466204 | SB | #N/A | Teosinte branched 1 (tb1)              | 79.8 |      |       | 4.0  | 37.3 |      | regulatory               |
| AF348319 | 70  | ZM | AB058397 | OS | 860  | terminal ear1                          | 92.0 | 892  | 0     | 20.9 | 27.7 | 6074 | regulatory               |
| AF264877 | 58  | ZM | AC096688 | OS | #N/A | translational elongation factor EF-TuM |      | 268  | 2E-68 | 14.4 | 18.1 | 4646 | housekeeping             |
| X15704   | 372 | ZM | AF182523 | OS | 780  | tubulin A2                             | 98.7 | 402  | 0     | 7.2  | 7.7  | 3612 | housekeeping             |
| M60171   | 328 | ZM | AF182523 | OS | 780  | tubulin A3                             | 95.1 | 316  | 0     | 10.4 | 10.7 | 2590 | housekeeping             |
| X15704   | 372 | ZM | AF182523 | OS | 780  | tubulin A1                             | 98.7 | 402  | 0     | 14.4 | 15.0 | 2229 | housekeeping             |
| AJ420859 | 508 | ZM | AF474922 | OS | 794  | tubulin A5                             | 82.6 | 208  | 2E-50 | 3.0  | 3.7  | 2326 | housekeeping             |
| AJ420858 | 509 | ZM | D86611   | OS | 795  | tubulin A6                             | 50.6 | 1126 | 0     | 9.1  | 9.0  | 1211 | housekeeping             |
| AF486508 | 724 | HV | AY050175 | TA | 578  | Waxy1                                  | 95.1 |      |       | 0.0  | 0.0  |      | starch metabolism        |
| AF141954 | 840 | OS | X07931   | HV | #N/A | Waxy1                                  | 87.7 |      |       | 0.0  | 0.0  |      | starch metabolism        |
| AF141954 | 840 | OS | AY050175 | TA | 578  | Waxy1                                  | 84.7 |      |       | 0.0  | 0.0  |      | starch metabolism        |
| X03935   | 363 | ZM | X07931   | HV | #N/A | Waxy1                                  | 87.1 |      |       | 0.0  | 0.0  |      | starch metabolism        |
| X03935   | 363 | ZM | AY050175 | HV | 578  | Waxy1                                  | 84.5 |      |       | 0.0  | 0.0  |      | starch metabolism        |
| X03935   | 363 | ZM | AF141954 | OS | 840  | Waxy1                                  | 87.2 | 163  | 7E-85 | 5.3  | 6.3  | 3184 | starch metabolism        |
| X91883   | 411 | ZM | AP003105 | OS | 861  | ZEMb                                   | 23.7 | 95   | 1E-44 | 17.8 | 27.0 | 1853 | transcription factor     |
| AX085359 | 203 | ZM | AF345911 | OS | 862  | ZMADS2 MADS-box gene                   | 53.7 | 53   | 3E-19 | 10.4 | 11.5 | 4335 | transcription factor     |
