# Supplementary material
Source: PubMed Central journal article supplement (PMC153722)

| Occurrence Frequency | Promoter Sequences | VISTA CNS |
|----------------------|--------------------|-----------|
| 4                    | 36                 | 2         |
| 7                    | 73                 | 5         |
| 11                   | 186                | 5         |
| 14                   | 280                | 6         |
| 18                   | 383                | 30        |
| 22                   | 570                | 39        |
| 25                   | 646                | 60        |
| 32                   | 860                | 103       |
| 36                   | 891                | 113       |
| 40                   | 935                | 116       |
| 43                   | 906                | 118       |
| 47                   | 840                | 135       |
| 51                   | 915                | 157       |
| 54                   | 797                | 146       |
| 58                   | 711                | 125       |
| 61                   | 675                | 147       |
| 65                   | 578                | 125       |
| 69                   | 565                | 109       |
| 72                   | 503                | 117       |
| 76                   | 442                | 106       |
| 79                   | 398                | 103       |
| 83                   | 357                | 87        |
| 87                   | 350                | 108       |
| 90                   | 263                | 77        |
| 94                   | 256                | 80        |
| 97                   | 220                | 74        |
| 101                  | 217                | 74        |
| 105                  | 174                | 64        |
| 108                  | 137                | 50        |
| 112                  | 135                | 51        |
| 115                  | 119                | 45        |
| 119                  | 106                | 44        |
| 123                  | 97                 | 41        |
| 126                  | 84                 | 38        |
| 130                  | 83                 | 34        |
| 133                  | 71                 | 38        |
| 137                  | 67                 | 31        |
| 141                  | 53                 | 14        |
| 144                  | 56                 | 31        |
| 148                  | 51                 | 26        |
| 152                  | 32                 | 17        |
| 155                  | 30                 | 19        |
| 159                  | 30                 | 14        |
| 162                  | 25                 | 16        |

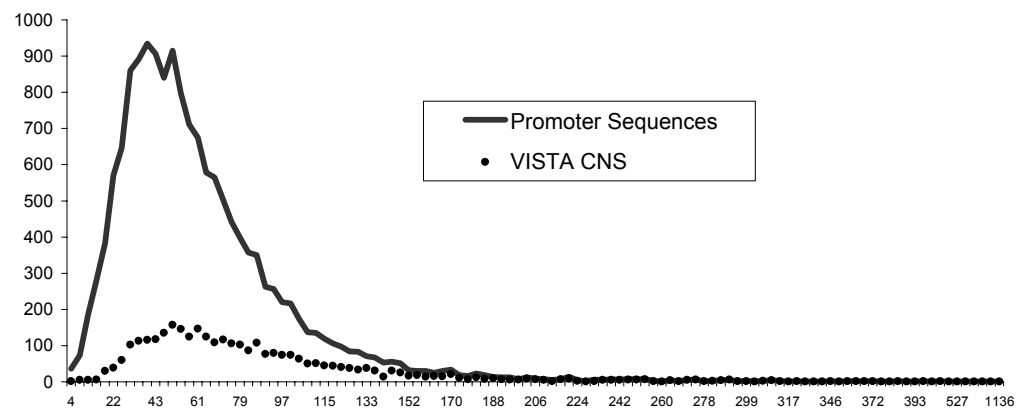

|     |    |    |
|-----|----|----|
| 166 | 30 | 15 |
| 170 | 34 | 21 |
| 173 | 19 | 11 |
| 177 | 16 | 7  |
| 180 | 23 | 12 |
| 184 | 19 | 8  |
| 188 | 13 | 10 |
| 191 | 12 | 7  |
| 195 | 12 | 6  |
| 198 | 7  | 6  |
| 202 | 12 | 9  |
| 206 | 9  | 7  |
| 209 | 7  | 5  |
| 213 | 5  | 2  |
| 216 | 7  | 7  |
| 220 | 14 | 9  |
| 224 | 4  | 3  |
| 227 | 2  | 1  |
| 231 | 6  | 2  |
| 234 | 5  | 5  |
| 238 | 7  | 5  |
| 242 | 6  | 5  |
| 245 | 8  | 6  |
| 249 | 7  | 6  |
| 253 | 8  | 7  |
| 256 | 3  | 2  |
| 260 | 1  | 1  |
| 263 | 4  | 4  |
| 267 | 2  | 2  |
| 271 | 5  | 5  |
| 274 | 6  | 6  |
| 278 | 2  | 2  |
| 281 | 3  | 3  |
| 285 | 4  | 4  |
| 289 | 5  | 6  |
| 292 | 2  | 2  |
| 299 | 3  | 2  |
| 303 | 1  | 1  |
| 307 | 3  | 3  |
| 310 | 4  | 4  |
| 314 | 3  | 2  |
| 317 | 1  | 1  |
| 321 | 2  | 2  |
| 325 | 1  | 1  |
| 339 | 1  | 1  |

|         |             |          |
|---------|-------------|----------|
| 343     | 1           | 1        |
| 346     | 2           | 2        |
| 354     | 1           | 1        |
| 357     | 2           | 2        |
| 361     | 2           | 2        |
| 368     | 2           | 2        |
| 372     | 2           | 2        |
| 379     | 1           | 1        |
| 382     | 1           | 1        |
| 386     | 2           | 2        |
| 390     | 1           | 1        |
| 393     | 1           | 1        |
| 408     | 2           | 2        |
| 411     | 1           | 1        |
| 462     | 2           | 2        |
| 473     | 1           | 1        |
| 527     | 1           | 1        |
| 570     | 1           | 1        |
| 620     | 1           | 1        |
| 675     | 1           | 1        |
| 743     | 1           | 1        |
| 1136    | 1           | 1        |
| sum     | 15581       | 3206     |
| Average | 140.3693694 | 28.88288 |

Supplement: plntcell_15_5_1143__3.pdf [file plntcell_15_5_1143__3.pdf]
